# Supplementary material for: The RNA-binding profile of Acinus, a peripheral component of the exon junction complex, reveals its role in splicing regulation
Source: RNA. 2016 Sep;22(9):1411–26. doi: 10.1261/rna.057158.116 (PMC4986896; doi:10.1261/rna.057158.116)
Supplement: Supplemental Material [file supp_057158.116_Supp_Table_S1.xlsx]

## Sheet: CLIP+
chr	intron_start	intron_end	strd	gene_name	reads_AciL	reads_AciS	reads_T7Aci	reads_ContL	reads_ContS	reads_T7ContL	reads_Aci	reads_Cont	delta_pir	reliable_delta_pir
chr6	28264723	28265671	+	PGBD1	7	5	12	0	1	0	24	1	78.8567	YES
chr17	46053020	46053234	+	CDK5RAP3	127	90	49	2	2	0	266	4	56.31	YES
chr17	37872193	37872553	+	ERBB2	35	15	41	1	0	0	91	1	52.6333	YES
chr3	49935119	49935483	-	MST1R	84	35	41	10	1	0	160	11	52.0867	YES
chr3	49162918	49163179	-	LAMB2	33	16	15	1	0	0	64	1	47.6467	YES
chr3	48629901	48630002	-	COL7A1	31	18	20	0	1	0	69	1	38.85	YES
chr3	49166758	49167036	-	LAMB2	50	37	23	0	2	0	110	2	38.18	YES
chr12	48528822	48529073	+	PFKM	45	40	33	2	1	0	118	3	33.41	YES
chr15	43713373	43714052	-	TP53BP1	25	21	21	0	0	3	67	3	32.5733	YES
chr9	140100365	140100683	+	NDOR1	15	24	35	3	1	0	74	4	32.37	YES
chr16	24741168	24741573	+	TNRC6A	6	5	7	1	0	0	18	1	31.6233	YES
chr7	100280401	100280634	-	GIGYF1	31	15	39	3	3	0	85	6	30.6	YES
chr17	72768194	72768356	-	NAT9	45	23	56	3	4	0	124	7	29.8467	YES
chr22	51065481	51065593	-	ARSA	12	8	9	0	0	0	29	0	29.8167	YES
chr9	140109655	140109858	+	NDOR1	25	10	39	1	0	0	74	1	28.9767	YES
chr19	10822976	10823228	+	QTRT1	127	44	128	3	7	0	299	10	27.6433	YES
chr6	43402587	43403488	+	ABCC10	13	13	18	1	1	1	44	3	27.1767	YES
chr9	35663072	35663318	-	C9orf100	32	15	7	0	3	0	54	3	25.5267	YES
chr12	48189164	48189369	-	HDAC7	15	5	38	1	1	0	58	2	25.0567	YES
chr1	3417873	3418359	-	MEGF6	138	74	67	8	8	5	279	21	23.8867	YES
chr1	16532163	16532425	-	ARHGEF19	30	34	35	4	0	2	99	6	23.85	YES
chr16	2980012	2980413	+	FLYWCH1	5	6	5	0	0	0	16	0	22.98	YES
chr18	8376596	8378262	+	PTPRM	90	57	47	7	7	2	194	16	22.9067	YES
chr16	89597217	89598311	+	SPG7	20	11	40	1	0	0	71	1	22.0033	YES
chr3	48631982	48632507	-	COL7A1	43	25	48	0	1	0	116	1	21.9833	YES
chr7	44799828	44800023	+	ZMIZ2	68	21	40	1	1	0	129	2	21.92	YES
chr2	131127764	131128129	+	PTPN18	36	18	32	1	1	0	86	2	21.6733	YES
chr19	47983665	47984016	-	KPTN	31	15	31	4	2	1	77	7	21.64	YES
chr11	66136671	66136839	-	SLC29A2	18	10	23	3	0	0	51	3	21.1667	YES
chr11	67816762	67817129	+	TCIRG1	62	38	46	4	2	0	146	6	20.2967	YES
chr11	108165787	108168013	+	ATM	30	22	10	5	1	0	62	6	19.98	YES
chr5	157216576	157218710	-	CLINT1	68	40	62	11	8	4	170	23	19.9267	YES
chr10	75566570	75566865	-	NDST2	33	19	17	0	3	1	69	4	19.9033	YES
chr7	4829561	4830089	+	KIAA0415	19	18	58	1	3	0	95	4	19.7633	YES
chr11	67810499	67810837	+	TCIRG1	63	35	36	3	7	0	134	10	19.5367	YES
chr3	48608712	48609433	-	COL7A1	85	59	72	4	3	0	216	7	19.1467	YES
chr2	242438830	242439587	-	STK25	77	56	123	5	3	2	256	10	19.1	YES
chr5	141312967	141313804	+	KIAA0141	8	5	14	0	1	0	27	1	19.0733	YES
chr6	170878868	170880497	+	TBP	29	23	20	1	2	1	72	4	19.0533	YES
chr16	705890	706301	+	WDR90	88	55	168	6	3	2	311	11	18.75	YES
chr16	30001127	30002104	+	TAOK2	13	17	22	0	3	1	52	4	17.43	YES
chr13	111289597	111290588	+	CARKD	14	8	25	1	1	2	47	4	17.3633	YES
chr2	74702530	74702738	-	CCDC142	7	13	27	1	1	0	47	2	17.25	YES
chr16	89882395	89882944	-	FANCA	8	7	17	0	0	2	32	2	17.2233	YES
chr1	155253927	155254329	+	HCN3	38	37	31	3	2	3	106	8	17.1867	YES
chr9	140108521	140108655	+	NDOR1	9	10	16	1	1	0	35	2	16.86	YES
chrX	53113805	53113936	+	TSPYL2	41	29	25	2	0	3	95	5	16.4533	YES
chr14	24031803	24032588	-	AP1G2	24	19	12	0	2	0	55	2	16.4133	YES
chr22	20102971	20103194	-	TRMT2A	37	21	25	0	3	1	83	4	16.3167	YES
chrX	153696903	153697005	+	PLXNA3	12	8	19	0	0	0	39	0	15.76	YES
chr6	43014340	43014617	-	CUL7	23	9	5	0	0	0	37	0	15.73	YES
chr16	707222	707761	+	WDR90	40	20	81	1	2	1	141	4	15.6767	YES
chr8	145739747	145739825	-	RECQL4	12	21	27	0	0	0	60	0	15.6667	YES
chr6	109772904	109773448	-	MICAL1	44	35	29	0	3	1	108	4	15.4633	YES
chr22	50661022	50662569	-	TUBGCP6	43	38	37	0	4	3	118	7	15.4533	YES
chr16	88799141	88799685	-	FAM38A	382	210	438	25	17	7	1030	49	15.4333	YES
chr12	120606105	120607972	-	GCN1L1	93	59	227	8	9	9	379	26	15.3633	YES
chr17	3561470	3563151	+	CTNS	20	11	43	0	2	5	74	7	15.1233	YES
chr1	10521760	10523114	-	DFFA	41	26	49	0	5	4	116	9	15.0233	YES
chr3	49160807	49160879	-	LAMB2	17	6	9	0	0	0	32	0	14.9133	YES
chr7	149426461	149427236	+	KRBA1	16	11	29	0	0	0	56	0	14.7833	YES
chr16	716793	716904	+	WDR90	5	5	10	0	0	0	20	0	14.6867	YES
chr6	109762832	109763176	+	SMPD2	13	16	23	0	2	0	52	2	14.6167	YES
chr22	50684257	50684338	-	HDAC10	6	6	9	0	0	0	21	0	14.5667	YES
chr17	43009611	43010040	-	KIF18B	79	39	106	7	6	3	224	16	14.0933	YES
chr17	3560090	3561298	+	CTNS	17	11	28	1	1	0	56	2	14.0433	YES
chr14	45578984	45579296	+	PRPF39	29	24	8	3	2	0	61	5	13.95	YES
chr14	24033066	24033254	-	AP1G2	38	25	32	1	1	0	95	2	13.9167	YES
chr19	2476629	2477026	+	GADD45B	10	5	57	0	0	1	72	1	13.87	YES
chr16	56926073	56926864	+	SLC12A3	251	170	42	7	17	1	463	25	13.7467	YES
chr2	201724470	201724847	-	CLK1	13	5	14	2	1	0	32	3	13.5667	YES
chr1	52823589	52824002	-	CC2D1B	20	8	24	4	0	0	52	4	13.5267	YES
chr17	7220893	7221106	-	NEURL4	10	5	22	0	1	0	37	1	13.0067	YES
chr15	101561388	101562049	+	LRRK1	71	45	59	6	4	0	175	10	12.7267	YES
chr2	27677030	27677220	-	IFT172	16	13	8	0	0	0	37	0	12.66	YES
chr16	70500858	70501276	+	FUK	11	7	7	0	0	0	25	0	12.5467	YES
chr8	22885955	22886041	-	TNFRSF10B	8	12	15	0	2	1	35	3	12.54	YES
chr15	43699769	43700140	-	TP53BP1	6	5	9	0	0	0	20	0	12.5133	YES
chr20	60885368	60885474	-	LAMA5	120	82	148	8	3	0	350	11	12.4833	YES
chr2	27680844	27680992	-	IFT172	21	17	6	0	0	1	44	1	12.41	YES
chr4	25392638	25393959	+	ANAPC4	33	44	10	0	8	0	87	8	12.3367	YES
chr3	53891718	53892745	+	IL17RB	23	10	13	3	2	0	46	5	12.11	YES
chr15	42114876	42115136	+	MAPKBP1	19	5	13	0	1	0	37	1	12.1	YES
chr12	95451655	95452085	-	NR2C1	21	18	6	4	3	0	45	7	11.9967	YES
chr20	60897815	60898511	-	LAMA5	509	240	682	28	46	10	1431	84	11.84	YES
chr1	1326246	1328775	-	CCNL2	632	458	250	50	72	28	1340	150	11.71	YES
chr20	57568820	57569164	+	TH1L	42	19	34	2	3	2	95	7	11.6067	YES
chr16	2142594	2142954	-	PKD1	6	13	9	0	1	0	28	1	11.53	YES
chr19	19105296	19105952	-	SUGP2	185	106	135	8	10	2	426	20	11.4533	YES
chr3	49932807	49932879	-	MST1R	19	16	16	2	0	0	51	2	11.4467	YES
chr16	67866219	67866357	-	CENPT	14	9	13	2	0	0	36	2	11.2667	YES
chr13	96239984	96241407	-	DZIP1	21	23	8	1	3	0	52	4	11.26	YES
chr3	48602635	48602842	-	COL7A1	46	29	28	4	3	0	103	7	11.25	YES
chr15	85341277	85341545	+	ZNF592	17	17	17	0	2	2	51	4	11.2233	YES
chr14	23533467	23533563	-	ACIN1	7	6	12	1	0	0	25	1	11.2	YES
chr3	49934850	49934952	-	MST1R	6	10	10	0	2	1	26	3	11.1633	YES
chr1	11718451	11718589	+	FBXO44	17	10	8	0	0	0	35	0	11.02	YES
chr15	65112186	65113180	-	PIF1	8	5	19	1	0	0	32	1	10.98	YES
chr15	75650960	75651044	-	MAN2C1	15	12	28	0	1	0	55	1	10.83	YES
chr2	101644895	101645952	-	TBC1D8	10	13	21	0	1	0	44	1	10.76	YES
chr12	52449944	52450277	+	NR4A1	5	5	16	1	0	1	26	2	10.7533	YES
chr2	241530429	241531349	+	CAPN10	19	13	33	1	2	0	65	3	10.5833	YES
chr22	21348559	21348846	+	LZTR1	17	21	50	0	0	0	88	0	10.3767	YES
chr14	59939809	59942586	-	C14orf149	30	26	17	5	3	0	73	8	10.3333	YES
chr1	201843501	201843959	+	IPO9	40	21	30	0	3	3	91	6	10.2233	YES
chr6	43309950	43310413	-	ZNF318	14	5	8	0	1	0	27	1	10.1733	YES
chr12	58022930	58023934	-	B4GALNT1	19	32	23	2	1	0	74	3	10.13	YES
chr17	73487982	73488554	+	KIAA0195	47	22	57	1	1	2	126	4	10.1133	YES
chrX	48565019	48565827	+	SUV39H1	9	6	40	1	0	0	55	1	10.0967	YES
chr17	74087317	74090494	-	EXOC7	81	39	124	12	5	2	244	19	10.0733	YES
chr1	179078034	179078342	-	ABL2	18	10	141	0	2	3	169	5	10.0233	YES
chr12	121017401	121017576	-	POP5	7	11	6	0	1	0	24	1	9.88333	YES
chr1	153913083	153913379	-	DENND4B	31	13	37	1	0	4	81	5	9.85	YES
chr16	3335755	3336022	+	ZNF263	5	5	12	0	0	1	22	1	9.82333	YES
chr12	109971364	109972395	+	UBE3B	9	7	9	1	1	0	25	2	9.76667	YES
chr1	21100104	21103089	-	HP1BP3	356	266	90	27	50	11	712	88	9.73333	YES
chr8	38125980	38126399	-	PPAPDC1B	19	11	8	0	1	0	38	1	9.41667	YES
chr16	731881	732019	+	STUB1	36	20	50	0	0	0	106	0	9.40333	YES
chr11	67270190	67271573	-	PITPNM1	18	10	74	3	1	2	102	6	9.40333	YES
chr1	153905254	153905336	-	DENND4B	10	16	14	1	2	1	40	4	9.33667	YES
chr12	54107685	54107916	-	CALCOCO1	29	13	7	1	0	0	49	1	9.29667	YES
chr11	65632287	65632487	+	MUS81	28	10	20	0	1	0	58	1	9.23	YES
chr3	46720778	46721919	-	ALS2CL	48	31	51	6	5	4	130	15	9.15667	YES
chr7	44796139	44796545	+	ZMIZ2	16	7	12	1	0	0	35	1	9.12	YES
chr11	66595836	66605837	+	C11orf80	15	15	8	0	0	1	38	1	9.06	YES
chr3	129150422	129151345	-	MBD4	27	28	21	2	4	0	76	6	9.04333	YES
chr17	26960770	26960912	-	KIAA0100	27	22	44	4	0	0	93	4	8.99667	YES
chr15	28421915	28422095	-	HERC2	12	15	5	1	0	0	32	1	8.98	YES
chr20	62321219	62321439	+	RTEL1	19	6	26	1	1	0	51	2	8.95	YES
chr17	79864054	79864339	-	PCYT2	12	7	14	0	1	0	33	1	8.80667	YES
chrX	48341183	48341373	+	FTSJ1	23	11	17	0	1	0	51	1	8.71667	YES
chr9	131397539	131397936	-	WDR34	26	21	25	1	1	0	72	2	8.69333	YES
chr8	145725775	145725869	+	PPP1R16A	20	6	26	0	1	0	52	1	8.50333	YES
chr17	79649180	79650042	-	ARL16	8	6	6	0	0	0	20	0	8.50333	YES
chr12	57499383	57499973	-	STAT6	60	39	81	1	3	1	180	5	8.39333	YES
chr16	30762603	30762869	+	PHKG2	27	15	14	1	0	1	56	2	8.38667	YES
chr11	800015	800130	-	LRDD	17	12	7	0	0	0	36	0	8.38	YES
chr1	26610974	26611954	-	UBXN11	49	40	84	7	8	3	173	18	8.33667	YES
chr11	124493130	124494826	+	TBRG1	10	12	8	0	0	0	30	0	8.21333	YES
chr3	48712181	48715996	-	NCKIPSD	39	32	34	0	2	1	105	3	8.17	YES
chr14	24709138	24709269	-	TINF2	11	6	6	0	1	1	23	2	8.15333	YES
chr1	151380717	151380884	-	POGZ	46	19	9	1	2	0	74	3	8.14	YES
chr11	64680874	64681292	-	ATG2A	22	11	43	1	2	0	76	3	8.09333	YES
chr21	34131581	34132087	-	GCFC1	56	34	62	4	0	3	152	7	8.06667	YES
chr6	43592800	43593099	-	GTPBP2	101	64	51	2	2	4	216	8	8.04667	YES
chr6	52957623	52958263	+	FBXO9	57	40	16	2	4	1	113	7	7.97	YES
chr19	2206797	2207572	+	DOT1L	18	9	51	3	1	1	78	5	7.93	YES
chr1	115322837	115323057	-	SIKE1	5	11	20	1	0	0	36	1	7.87333	YES
chr2	47220668	47221495	+	TTC7A	77	45	50	8	9	2	172	19	7.85667	YES
chr16	67226774	67226911	+	E2F4	32	13	69	1	1	3	114	5	7.81	YES
chrX	70347318	70347742	+	MED12	43	22	41	2	4	3	106	9	7.77333	YES
chr20	3897698	3899317	+	PANK2	42	15	38	5	3	6	95	14	7.75	YES
chr16	89759876	89760580	+	CDK10	60	33	144	9	4	2	237	15	7.71667	YES
chr11	62400987	62401781	-	GANAB	71	34	47	6	4	4	152	14	7.7	YES
chr19	36590520	36591649	+	WDR62	10	13	19	0	2	0	42	2	7.51333	YES
chr16	30012362	30012734	+	INO80E	10	10	9	0	0	0	29	0	7.44	YES
chr17	2598821	2599452	-	KIAA0664	122	39	385	5	6	9	546	20	7.33667	YES
chr6	44270648	44270802	-	AARS2	10	8	5	1	0	0	23	1	7.29333	YES
chr9	35751410	35751623	+	RGP1	26	14	7	0	0	1	47	1	7.29	YES
chr14	21554026	21555159	+	ARHGEF40	10	8	8	2	1	0	26	3	7.21667	YES
chr9	132400939	132401480	-	ASB6	10	14	25	1	0	1	49	2	7.21333	YES
chr1	100613883	100614180	+	CCDC76	6	9	8	0	1	1	23	2	7.18667	YES
chr17	80350411	80356071	-	C17orf101	41	27	21	2	5	1	89	8	7.15	YES
chr7	4823092	4823319	+	KIAA0415	49	28	95	3	2	5	172	10	7.08	YES
chr2	239003164	239005441	+	SCLY	11	5	31	2	1	0	47	3	7.06333	YES
chr2	242437765	242438053	-	STK25	24	16	38	1	2	0	78	3	7.01	YES
chr17	53014588	53016284	+	TOM1L1	31	22	10	1	4	2	63	7	7.00333	YES
chr3	42674316	42675071	+	NKTR	41	32	14	4	3	1	87	8	6.99333	YES
chr11	64575153	64575362	-	MEN1	18	8	22	2	0	0	48	2	6.98	YES
chr8	145150132	145150735	+	CYC1	31	9	52	5	0	0	92	5	6.94333	YES
chr22	51019983	51020177	-	CHKB	21	6	26	0	1	1	53	2	6.92667	YES
chr6	44197784	44198083	+	SLC29A1	27	21	23	2	1	0	71	3	6.90667	YES
chr17	36872082	36872619	+	MLLT6	122	50	133	2	5	4	305	11	6.86333	YES
chr12	57492862	57493076	-	STAT6	18	9	27	3	0	0	54	3	6.80667	YES
chr10	134016330	134017265	+	DPYSL4	16	12	17	1	1	0	45	2	6.78333	YES
chr8	145619254	145619327	-	CPSF1	12	8	11	1	0	0	31	1	6.78	YES
chr15	85191186	85191767	-	WDR73	33	26	37	2	4	0	96	6	6.71333	YES
chr2	220471240	220471433	+	STK11IP	14	6	7	1	0	0	27	1	6.69	YES
chr16	70542368	70543133	-	COG4	133	52	43	5	5	0	228	10	6.66333	YES
chr16	1568359	1569881	-	IFT140	8	5	8	1	1	0	21	2	6.65	YES
chr3	100064523	100065024	+	NIT2	48	47	12	0	5	1	107	6	6.63333	YES
chr11	47753114	47754088	-	FNBP4	207	123	132	8	8	3	462	19	6.63	YES
chr7	100281256	100281440	-	GIGYF1	6	5	25	0	0	0	36	0	6.63	YES
chr1	46725772	46726213	+	RAD54L	41	49	17	2	1	0	107	3	6.62	YES
chr2	240951114	240954155	-	NDUFA10	107	79	109	8	14	10	295	32	6.59333	YES
chr20	39986675	39986876	+	LPIN3	11	10	16	0	1	0	37	1	6.58	YES
chr16	56867319	56868039	+	NUP93	22	13	22	0	1	1	57	2	6.54	YES
chr1	110031723	110032551	+	ATXN7L2	18	8	42	2	0	0	68	2	6.53667	YES
chr1	117624570	117626639	+	TTF2	139	67	64	9	13	1	270	23	6.53667	YES
chr3	46718229	46718338	-	ALS2CL	30	16	23	2	0	0	69	2	6.48333	YES
chr3	48668154	48668425	-	SLC26A6	22	18	25	2	1	1	65	4	6.39333	YES
chr22	50943583	50943657	-	LMF2	8	6	16	0	0	0	30	0	6.37333	YES
chr19	990365	990851	+	WDR18	17	5	41	2	0	1	63	3	6.37	YES
chr9	139726823	139728171	+	C9orf86	76	71	79	7	7	3	226	17	6.32	YES
chr5	139940340	139940602	-	APBB3	12	13	7	0	0	0	32	0	6.29333	YES
chr22	50965713	50966016	-	TYMP	11	14	19	0	1	0	44	1	6.22667	YES
chr15	34655921	34656213	-	LPCAT4	20	6	17	1	1	2	43	4	6.22667	YES
chr15	75655090	75656339	-	MAN2C1	31	26	41	3	0	6	98	9	6.21333	YES
chr14	60592542	60600687	+	C14orf135	16	11	8	1	0	0	35	1	6.21	YES
chr1	55518085	55518322	+	PCSK9	75	90	57	13	10	0	222	23	6.19667	YES
chr8	145666254	145666348	-	NFKBIL2	7	6	26	0	0	0	39	0	6.19	YES
chr11	66136143	66136530	-	SLC29A2	29	23	75	5	1	0	127	6	6.14667	YES
chr9	111681182	111681532	-	IKBKAP	18	21	7	0	0	0	46	0	6.11333	YES
chr21	46600360	46602499	+	ADARB1	468	301	345	45	59	23	1114	127	6.10333	YES
chr1	163298095	163298635	+	NUF2	37	20	7	6	4	0	64	10	6.10333	YES
chr11	722166	722400	+	EPS8L2	49	19	68	4	2	0	136	6	6.09333	YES
chr19	10227865	10229343	-	EIF3G	44	35	61	4	7	2	140	13	6.04667	YES
chr1	110591861	110592081	+	FAM40A	17	11	12	1	0	1	40	2	6.02667	YES
chr14	50246394	50246465	+	KLHDC2	29	33	7	0	0	0	69	0	6.00333	YES
chr15	42127843	42128345	+	JMJD7	17	8	16	0	1	0	41	1	5.98667	YES
chr2	219561325	219561761	+	STK36	31	21	17	0	3	3	69	6	5.97667	YES
chr11	73064058	73066577	+	ARHGEF17	28	24	18	1	1	0	70	2	5.93333	YES
chr16	88783620	88785981	-	FAM38A	396	291	379	12	17	5	1066	34	5.92	YES
chr10	69750158	69750660	-	HERC4	102	51	26	5	5	5	179	15	5.89667	YES
chr16	1712837	1715057	+	CRAMP1L	5	5	20	0	1	0	30	1	5.84	YES
chr2	174228624	174229522	+	CDCA7	119	107	39	3	4	5	265	12	5.81667	YES
chr12	49448535	49448682	-	MLL2	6	12	33	0	0	1	51	1	5.78667	YES
chr17	7605108	7605661	+	WRAP53	7	8	12	0	0	0	27	0	5.74333	YES
chr16	1717402	1717962	+	CRAMP1L	6	5	9	0	1	0	20	1	5.74	YES
chr20	62319124	62319289	+	RTEL1	15	5	23	0	1	0	43	1	5.60667	YES
chr3	47045884	47045984	+	NBEAL2	13	12	8	0	0	1	33	1	5.60333	YES
chr12	56549377	56551251	+	MYL6B	21	12	13	0	0	0	46	0	5.6	YES
chr1	110282116	110282861	-	GSTM3	20	9	32	4	0	1	61	5	5.54667	YES
chr19	3573799	3574380	+	HMG20B	160	41	164	5	2	3	365	10	5.49333	YES
chr11	68846489	68847301	+	TPCN2	40	41	54	3	5	1	135	9	5.41	YES
chrX	18942253	18942498	-	PHKA2	62	47	16	1	1	0	125	2	5.38667	YES
chr12	123461518	123462988	+	OGFOD2	34	16	24	2	2	3	74	7	5.32	YES
chr7	138719425	138720398	-	ZC3HAV1L	16	13	30	0	2	0	59	2	5.32	YES
chr1	153913525	153913706	-	DENND4B	8	10	22	0	2	0	40	2	5.30333	YES
chr19	50919981	50920301	+	POLD1	7	6	20	0	0	0	33	0	5.26	YES
chr22	50663022	50664222	-	TUBGCP6	12	8	15	0	0	0	35	0	5.25	YES
chr11	64573243	64573703	-	MEN1	36	11	35	0	1	4	82	5	5.24667	YES
chr22	50685396	50686120	-	HDAC10	21	10	7	3	2	0	38	5	5.15333	YES
chr3	49935645	49935950	-	MST1R	7	8	7	0	0	0	22	0	5.10333	YES
chr7	100281781	100281859	-	GIGYF1	10	7	12	0	0	0	29	0	5.09	YES
chr11	62370362	62370620	-	EML3	39	44	51	3	4	0	134	7	5.08333	YES
chr1	161132517	161132708	+	USP21	21	9	14	2	0	0	44	2	5.05667	YES
chr1	207933070	207934593	+	CD46	63	43	20	4	8	1	126	13	5.02333	YES
chr16	29815387	29816134	+	KIF22	66	50	77	8	4	2	193	14	5.01667	YES
chr2	128047078	128047264	-	ERCC3	75	71	113	4	5	2	259	11	5.01	YES
chr2	220097914	220098007	+	ANKZF1	11	8	7	0	0	1	26	1	5	YES
chr11	62549806	62550164	+	TAF6L	6	5	13	0	0	0	24	0	5	YES
chr13	33095587	33096318	-	N4BP2L2	42	22	6	4	4	1	70	9	4.95333	YES
chr11	66026294	66029212	+	KLC2	20	15	54	0	3	0	89	3	4.94333	YES
chr1	78414460	78414839	-	FUBP1	196	151	42	5	16	5	389	26	4.92667	YES
chr19	7706740	7706919	+	STXBP2	6	5	9	0	1	0	20	1	4.85333	YES
chr16	2548398	2549357	+	TBC1D24	14	6	26	1	1	1	46	3	4.84667	YES
chr17	34866757	34867203	-	MYO19	43	44	36	2	0	1	123	3	4.82667	YES
chr4	957079	958963	-	DGKQ	23	10	36	4	0	2	69	6	4.81667	YES
chr11	62401848	62402292	-	GANAB	92	44	36	3	6	2	172	11	4.80667	YES
chr16	89805383	89805540	-	FANCA	21	6	11	1	0	0	38	1	4.77333	YES
chr8	145657844	145658970	-	NFKBIL2	22	10	43	0	1	0	75	1	4.77	YES
chr20	60903502	60903899	-	LAMA5	677	384	549	30	40	4	1610	74	4.76667	YES
chr1	3394591	3394987	+	ARHGEF16	7	10	12	1	0	0	29	1	4.76333	YES
chr19	46281900	46282521	-	DMPK	34	19	22	4	2	0	75	6	4.75667	YES
chr1	15892676	15893593	+	DNAJC16	14	10	6	2	0	0	30	2	4.74333	YES
chr20	34081400	34082350	+	CEP250	42	24	45	3	2	0	111	5	4.70667	YES
chr7	30058740	30062280	-	FKBP14	39	20	13	5	1	0	72	6	4.67	YES
chr9	135782223	135782687	-	TSC1	16	13	12	0	1	2	41	3	4.67	YES
chr3	24004097	24006467	+	NR1D2	9	6	11	1	0	2	26	3	4.66667	YES
chr11	6498499	6498947	-	ARFIP2	50	31	85	2	4	0	166	6	4.66667	YES
chr12	132625566	132625819	-	DDX51	8	7	18	1	0	1	33	2	4.65	YES
chr8	145580576	145580649	-	FBXL6	10	5	29	0	0	0	44	0	4.65	YES
chrX	48434056	48434701	+	RBM3	223	134	127	3	9	2	484	14	4.64667	YES
chr16	88786692	88786792	-	FAM38A	43	27	45	2	2	0	115	4	4.64667	YES
chr3	126748380	126748716	+	PLXNA1	32	14	58	0	0	2	104	2	4.62333	YES
chr17	8170217	8170345	+	PFAS	11	10	24	0	1	0	45	1	4.61333	YES
chr1	1233494	1233749	-	ACAP3	22	18	45	0	2	1	85	3	4.60333	YES
chr22	39136438	39137011	-	SUN2	19	16	12	0	0	0	47	0	4.58667	YES
chr19	1119621	1119904	-	SBNO2	19	6	33	0	0	0	58	0	4.58667	YES
chr10	104159476	104159836	+	NFKB2	26	21	39	1	2	3	86	6	4.58	YES
chr14	21463061	21463323	+	METT11D1	38	30	13	1	3	0	81	4	4.57667	YES
chr1	226047050	226048559	-	TMEM63A	39	15	24	1	3	3	78	7	4.56333	YES
chr11	134131785	134132413	+	ACAD8	13	12	6	1	0	0	31	1	4.55333	YES
chr15	78577682	78578382	-	WDR61	23	5	10	1	0	0	38	1	4.52333	YES
chr9	134386855	134387427	+	POMT1	24	16	13	4	2	0	53	6	4.52	YES
chr3	48731674	48732126	-	IP6K2	50	33	61	5	6	1	144	12	4.51333	YES
chr1	171763668	171765621	+	METTL13	10	19	17	0	3	1	46	4	4.48	YES
chr1	213415641	213415911	+	RPS6KC1	19	27	6	2	2	1	52	5	4.45	YES
chr17	1411521	1412471	-	INPP5K	9	5	14	1	0	0	28	1	4.43667	YES
chr7	103002536	103003132	+	PSMC2	28	13	17	0	1	3	58	4	4.42333	YES
chr2	160075873	160076202	+	TANC1	28	21	12	0	3	0	61	3	4.42333	YES
chr22	38690541	38694790	-	CSNK1E	534	275	575	34	55	10	1384	99	4.41667	YES
chr1	46738475	46739026	+	RAD54L	11	16	17	2	2	1	44	5	4.39333	YES
chr2	27262033	27262608	+	TMEM214	39	33	21	1	0	0	93	1	4.37	YES
chr19	40719096	40719423	+	MAP3K10	16	10	27	0	0	0	53	0	4.37	YES
chr3	129231256	129233231	+	IFT122	11	13	28	1	0	0	52	1	4.34	YES
chrX	47424539	47424650	+	ARAF	8	11	7	0	0	0	26	0	4.33667	YES
chr17	3936297	3937308	-	ZZEF1	23	7	5	2	0	0	35	2	4.31333	YES
chr1	197094086	197094175	-	ASPM	35	20	11	4	1	0	66	5	4.3	YES
chr2	219544804	219545325	+	STK36	8	9	8	0	0	1	25	1	4.29667	YES
chr22	50636425	50636503	+	TRABD	50	18	41	0	0	0	109	0	4.24667	YES
chr5	1035589	1036371	+	NKD2	15	6	10	0	0	2	31	2	4.24333	YES
chr20	37394162	37394880	+	ACTR5	11	17	8	1	2	0	36	3	4.19	YES
chr11	64030281	64030969	+	PLCB3	33	11	49	0	1	2	93	3	4.18667	YES
chr1	100732181	100733707	+	RTCD1	32	30	22	2	2	1	84	5	4.18	YES
chr2	27427800	27428217	-	SLC5A6	40	27	59	0	2	0	126	2	4.16667	YES
chr17	1940251	1943048	+	DPH1	15	24	30	0	2	0	69	2	4.16333	YES
chr19	36110661	36110913	+	HAUS5	19	19	33	0	0	0	71	0	4.15	YES
chr19	36592220	36592565	+	WDR62	12	5	9	0	0	0	26	0	4.15	YES
chr3	128628265	128628863	+	ACAD9	24	12	23	1	2	1	59	4	4.14333	YES
chr1	153662859	153665581	+	NPR1	43	27	32	2	3	1	102	6	4.14	YES
chr12	21659911	21661316	+	GOLT1B	18	11	11	0	1	0	40	1	4.11333	YES
chr4	8230372	8233702	+	SH3TC1	27	30	45	3	5	1	102	9	4.09	YES
chr16	8733020	8734987	+	C16orf68	5	10	6	0	1	0	21	1	4.08	YES
chr10	75560518	75560774	+	KIAA0913	14	9	18	0	0	0	41	0	4.07667	YES
chr2	109089356	109091990	+	GCC2	20	19	11	0	1	2	50	3	4.06333	YES
chr22	29925229	29927819	-	THOC5	28	30	58	0	6	0	116	6	4.06	YES
chr11	64668565	64669433	-	ATG2A	11	8	29	0	1	2	48	3	4.05	YES
chr11	67265794	67266066	-	PITPNM1	16	22	31	0	4	2	69	6	4.04333	YES
chr19	39908333	39908544	+	PLEKHG2	31	19	24	2	3	0	74	5	4.03	YES
chr11	71940797	71940967	+	INPPL1	63	22	37	1	3	0	122	4	4.01333	YES
chr15	75649244	75650541	-	MAN2C1	7	11	9	1	0	1	27	2	4	YES
chr8	145138404	145138616	+	GPAA1	48	30	28	1	6	0	106	7	3.99333	YES
chr1	161010121	161010365	-	USF1	24	14	10	2	1	0	48	3	3.99	YES
chr7	100479035	100479279	+	SRRT	122	51	87	3	5	1	260	9	3.97	YES
chr1	22828178	22828791	+	ZBTB40	26	14	16	0	1	0	56	1	3.95	YES
chr2	152980450	152982739	-	STAM2	11	11	10	1	1	0	32	2	3.93	YES
chr14	20760287	20763470	-	TTC5	7	7	5	0	0	0	19	0	3.91333	YES
chr3	50098981	50099394	+	RBM6	42	30	27	3	1	0	99	4	3.90667	YES
chr8	144695774	144695920	-	TSTA3	8	9	22	0	0	0	39	0	3.89333	YES
chr12	50028386	50028881	+	PRPF40B	22	8	9	0	0	0	39	0	3.87333	YES
chr11	32996890	32997879	+	QSER1	5	5	6	0	0	1	16	1	3.86333	YES
chr17	8110207	8110493	-	AURKB	72	24	55	0	1	0	151	1	3.85333	YES
chr12	116444217	116445215	-	MED13L	25	14	13	0	2	0	52	2	3.85333	YES
chr16	67174498	67178196	+	C16orf70	21	15	26	2	1	1	62	4	3.84333	YES
chr1	19565797	19566311	-	KIAA0090	43	21	17	1	1	1	81	3	3.81667	YES
chr5	176729180	176729397	-	RAB24	126	42	42	2	3	3	210	8	3.81333	YES
chr9	35740360	35740522	-	GBA2	44	42	32	2	1	0	118	3	3.81333	YES
chr22	20127416	20127637	+	ZDHHC8	44	20	34	3	1	0	98	4	3.81333	YES
chr11	62379069	62379907	-	EML3	16	7	32	1	1	0	55	2	3.81333	YES
chr1	153912281	153912631	-	DENND4B	72	59	81	5	6	2	212	13	3.80667	YES
chr1	225155286	225156460	+	DNAH14	55	47	28	7	8	1	130	16	3.78667	YES
chr8	1851618	1853736	+	ARHGEF10	37	33	26	6	1	2	96	9	3.77	YES
chr7	102108825	102109000	+	LRWD1	13	19	29	0	0	0	61	0	3.74667	YES
chr15	34651947	34652311	-	LPCAT4	36	27	50	0	1	0	113	1	3.71333	YES
chr16	15123914	15125591	+	PDXDC1	5	19	6	1	0	0	30	1	3.70667	YES
chr1	155723206	155724165	-	GON4L	11	14	13	1	0	0	38	1	3.69667	YES
chr15	91455510	91455771	+	MAN2A2	28	23	45	0	0	1	96	1	3.69333	YES
chr16	67979124	67979271	-	SLC12A4	15	14	13	0	0	0	42	0	3.68667	YES
chr6	74516796	74517805	+	CD109	11	10	5	2	2	0	26	4	3.66333	YES
chr8	145620767	145621562	-	CPSF1	52	44	127	0	4	0	223	4	3.66	YES
chr10	118681028	118687302	-	KIAA1598	10	21	13	0	3	0	44	3	3.65667	YES
chr2	233745961	233746895	-	NGEF	20	5	6	0	0	1	31	1	3.65667	YES
chr21	43329633	43332440	-	C2CD2	15	10	9	0	1	1	34	2	3.64667	YES
chr14	24620098	24620339	+	RNF31	13	6	21	0	0	0	40	0	3.64	YES
chr15	75652553	75652905	-	MAN2C1	32	19	52	0	2	0	103	2	3.63667	YES
chr12	49054403	49061475	-	C12orf41	74	64	45	5	6	1	183	12	3.63	YES
chr14	21967516	21967635	-	METTL3	36	26	20	1	0	1	82	2	3.62	YES
chr11	563318	563557	+	RASSF7	6	6	10	0	0	0	22	0	3.60333	YES
chr2	27246346	27246963	+	MAPRE3	17	7	12	0	1	0	36	1	3.57667	YES
chr12	121880834	121881482	-	KDM2B	10	14	52	1	0	0	76	1	3.56667	YES
chr9	135786501	135786839	-	TSC1	20	13	10	0	0	0	43	0	3.56	YES
chr19	11516103	11517094	-	RGL3	13	11	11	0	0	0	35	0	3.55667	YES
chr3	9516267	9516751	+	SETD5	66	42	52	1	2	4	160	7	3.53	YES
chr7	102963080	102963149	-	DNAJC2	37	29	123	4	1	0	189	5	3.52667	YES
chr1	23408860	23409671	+	KDM1A	32	25	22	2	5	0	79	7	3.51	YES
chr2	97268600	97269986	-	KIAA1310	7	5	6	0	0	1	18	1	3.49	YES
chrX	70586345	70587348	+	TAF1	31	41	59	5	3	4	131	12	3.48667	YES
chr6	90435116	90437551	-	MDN1	42	39	46	1	5	4	127	10	3.47667	YES
chr22	20077335	20077498	+	DGCR8	30	16	18	0	0	3	64	3	3.46333	YES
chr17	58022880	58023911	+	RPS6KB1	11	12	19	1	2	2	42	5	3.45	YES
chr19	10906116	10906736	+	DNM2	105	71	58	12	4	2	234	18	3.43667	YES
chr4	178272704	178274461	+	NEIL3	20	9	5	2	0	0	34	2	3.42667	YES
chrX	48370324	48370713	+	PORCN	8	6	5	0	0	1	19	1	3.42333	YES
chr16	30724137	30724528	+	SRCAP	33	14	37	2	1	0	84	3	3.40667	YES
chr15	30011343	30012561	-	TJP1	24	26	15	3	2	1	65	6	3.40333	YES
chr9	134404972	134405872	-	UCK1	12	5	27	0	1	0	44	1	3.4	YES
chr19	56171588	56171881	+	U2AF2	24	19	93	2	1	0	136	3	3.38333	YES
chr11	118252239	118253303	+	UBE4A	56	28	33	6	4	5	117	15	3.37	YES
chr1	91966506	91967210	+	CDC7	14	11	33	0	1	2	58	3	3.34333	YES
chr7	131193788	131194123	-	PODXL	47	47	76	3	9	1	170	13	3.34333	YES
chr3	52727346	52727423	+	GNL3	46	24	53	1	3	0	123	4	3.32333	YES
chr6	90365688	90366418	-	MDN1	10	5	9	0	0	1	24	1	3.31667	YES
chr20	47851626	47852686	+	DDX27	29	15	79	5	1	2	123	8	3.31	YES
chr17	2595392	2595654	-	KIAA0664	57	21	109	1	2	0	187	3	3.31	YES
chr11	57194126	57194358	-	SLC43A3	15	11	19	3	1	0	45	4	3.30667	YES
chr22	20074207	20074684	+	DGCR8	25	24	32	0	2	1	81	3	3.27667	YES
chr11	63721522	63721809	+	NAA40	20	13	12	0	0	1	45	1	3.27333	YES
chr1	155785692	155786002	-	GON4L	54	31	12	8	0	0	97	8	3.27	YES
chr1	153906348	153906610	-	DENND4B	59	44	87	0	0	0	190	0	3.26333	YES
chr3	51672338	51673434	+	RAD54L2	14	7	19	2	0	0	40	2	3.24	YES
chr11	126133940	126134085	-	SRPR	6	5	8	0	0	0	19	0	3.23333	YES
chr1	110169535	110169796	+	AMPD2	35	11	53	0	2	0	99	2	3.23	YES
chr17	73221560	73221792	+	NUP85	22	8	12	0	0	0	42	0	3.22667	YES
chr3	31661323	31663588	+	STT3B	22	14	17	0	0	0	53	0	3.20667	YES
chr17	7847567	7847793	+	CNTROB	5	5	14	1	0	2	24	3	3.2	YES
chr16	87365117	87367491	-	FBXO31	13	5	44	2	0	2	62	4	3.19333	YES
chr17	79170856	79171511	-	AZI1	11	5	15	0	0	0	31	0	3.16667	YES
chr9	140708961	140710398	+	EHMT1	40	31	76	2	4	3	147	9	3.15	YES
chr10	103785006	103789394	-	C10orf76	19	18	9	0	0	0	46	0	3.14667	YES
chrX	128722241	128722862	+	OCRL	20	11	5	0	2	0	36	2	3.13667	YES
chr3	47030461	47030574	+	NBEAL2	11	10	12	0	1	0	33	1	3.13	YES
chr7	1476493	1477170	-	MICALL2	35	15	33	4	3	0	83	7	3.12	YES
chr19	10221079	10221160	+	PPAN	16	15	36	1	0	0	67	1	3.11667	YES
chr4	1953959	1955050	+	WHSC1	47	17	33	4	2	0	97	6	3.11667	YES
chr6	152589301	152590289	-	SYNE1	14	7	5	0	0	0	26	0	3.11667	YES
chr16	109825	110213	-	RHBDF1	8	6	5	1	0	0	19	1	3.11667	YES
chr4	25407242	25408450	+	ANAPC4	7	23	14	0	1	0	44	1	3.10667	YES
chrX	48935407	48935495	-	WDR45	11	8	7	1	1	0	26	2	3.10333	YES
chr12	113729764	113730738	+	TPCN1	19	9	5	1	1	0	33	2	3.10333	YES
chr1	1686916	1687696	-	NADK	42	33	79	5	6	0	154	11	3.09333	YES
chr8	22053101	22054192	+	BMP1	6	11	10	0	1	0	27	1	3.07667	YES
chr12	57691171	57691872	-	R3HDM2	30	31	18	0	1	1	79	2	3.07333	YES
chr22	30394847	30398868	+	MTMR3	25	11	10	1	1	0	46	2	3.06333	YES
chr17	74015735	74017548	-	EVPL	7	7	14	0	0	0	28	0	3.04	YES
chr4	71691149	71691840	-	GRSF1	51	39	24	1	2	3	114	6	3.02	YES
chr12	49171520	49171890	-	ADCY6	14	12	14	1	0	0	40	1	3.01333	YES
chr17	30664974	30665226	-	C17orf75	11	11	6	0	0	0	28	0	3.01333	YES
chr13	115007756	115008731	+	CDC16	41	18	18	2	3	1	77	6	3.01	YES
chr16	67864452	67865118	-	CENPT	65	43	78	2	1	8	186	11	2.99	YES
chr11	65387404	65387809	+	PCNXL3	17	12	25	0	0	0	54	0	2.98667	YES
chr16	28109961	28112778	-	XPO6	84	66	155	13	11	2	305	26	2.98667	YES
chr6	33652721	33653135	+	ITPR3	150	56	228	2	1	3	434	6	2.97	YES
chr15	40477581	40477751	+	BUB1B	15	17	12	0	0	0	44	0	2.96667	YES
chr10	104118487	104119026	+	GBF1	22	20	5	3	2	0	47	5	2.96333	YES
chr16	75634247	75636982	-	ADAT1	19	13	18	2	0	2	50	4	2.95333	YES
chrX	40511132	40513615	-	MED14	24	20	32	3	2	5	76	10	2.94333	YES
chr22	40805023	40805253	+	SGSM3	53	15	33	1	1	0	101	2	2.93333	YES
chr5	1075606	1076252	-	SLC12A7	33	15	41	0	2	1	89	3	2.93333	YES
chr15	43738789	43739563	-	TP53BP1	42	19	10	0	1	2	71	3	2.91333	YES
chr13	115051876	115051993	+	UPF3A	13	41	8	0	1	0	62	1	2.91	YES
chr12	80200114	80201005	-	PPP1R12A	11	5	9	0	0	1	25	1	2.90667	YES
chr4	39465226	39466665	+	LIAS	11	6	5	0	0	0	22	0	2.90333	YES
chr11	65293822	65294253	+	SCYL1	18	8	21	2	0	1	47	3	2.88667	YES
chr12	109644662	109646969	+	ACACB	18	16	5	0	1	1	39	2	2.88	YES
chrX	100653556	100653772	-	GLA	8	9	8	0	0	1	25	1	2.86333	YES
chr2	27449188	27449392	+	CAD	26	22	23	2	2	0	71	4	2.85	YES
chrX	49103387	49103956	+	CCDC22	22	6	11	0	0	0	39	0	2.84667	YES
chr3	14176733	14177306	+	TMEM43	33	18	43	0	3	2	94	5	2.84	YES
chr17	74391943	74392208	-	UBE2O	7	11	19	0	0	0	37	0	2.83333	YES
chr3	49737206	49737659	+	RNF123	19	17	41	1	0	0	77	1	2.82667	YES
chr11	71943381	71943669	+	INPPL1	116	26	53	2	0	2	195	4	2.82333	YES
chr22	20049207	20050860	+	C22orf25	15	9	50	3	1	0	74	4	2.79667	YES
chr7	100728853	100730286	+	TRIM56	10	9	15	0	0	2	34	2	2.79333	YES
chr17	7127195	7127286	+	ACADVL	26	27	24	0	3	1	77	4	2.78333	YES
chr3	15116438	15117112	-	ZFYVE20	26	9	17	1	1	2	52	4	2.77667	YES
chr7	100479863	100481690	+	SRRT	315	138	380	26	23	6	833	55	2.77333	YES
chr22	42273426	42273945	+	SREBF2	28	18	22	2	2	3	68	7	2.76333	YES
chr20	39795500	39796491	+	PLCG1	76	44	67	2	6	2	187	10	2.76333	YES
chr3	63965844	63967861	+	ATXN7	25	12	13	3	0	1	50	4	2.75667	YES
chr3	50616358	50617274	+	HEMK1	8	7	12	0	1	0	27	1	2.75333	YES
chr20	60894070	60894739	-	LAMA5	350	215	384	23	38	7	949	68	2.74667	YES
chr11	62364888	62365081	-	MTA2	45	16	45	3	3	1	106	7	2.74	YES
chr9	13122170	13123151	-	MPDZ	16	10	9	2	0	1	35	3	2.73	YES
chr7	23235535	23236298	+	NUPL2	20	7	14	0	0	0	41	0	2.72667	YES
chr11	74336619	74340261	+	POLD3	34	26	23	5	4	1	83	10	2.69333	YES
chr15	68504202	68506627	-	CLN6	19	18	62	2	3	1	99	6	2.67333	YES
chr21	33694895	33696800	-	URB1	75	70	82	11	10	3	227	24	2.66667	YES
chr8	90993752	90994949	-	NBN	10	10	9	2	0	0	29	2	2.66333	YES
chr2	27591331	27591520	-	EIF2B4	25	12	29	0	0	0	66	0	2.65333	YES
chr17	41898427	41901298	-	MPP3	15	8	33	2	1	6	56	9	2.65333	YES
chr3	49927494	49927917	-	MST1R	5	5	20	1	1	0	30	2	2.64667	YES
chr17	73230884	73231194	+	NUP85	69	34	20	0	3	0	123	3	2.64	YES
chr7	151841967	151842237	-	MLL3	17	11	9	2	1	0	37	3	2.63333	YES
chr7	1539658	1539805	-	INTS1	11	13	19	2	1	0	43	3	2.62667	YES
chr12	120599863	120600650	-	GCN1L1	43	36	64	1	3	0	143	4	2.62667	YES
chr16	68330714	68331136	+	SLC7A6	33	12	22	0	2	0	67	2	2.61667	YES
chr16	240570	242925	-	LUC7L	19	13	49	2	2	0	81	4	2.61	YES
chr16	8738583	8739964	+	C16orf68	35	16	28	2	3	0	79	5	2.60667	YES
chr11	18111838	18111980	-	SAAL1	10	15	5	0	0	0	30	0	2.58667	YES
chr11	130780266	130781527	-	SNX19	25	10	6	3	1	0	41	4	2.56333	YES
chr4	1207394	1208130	-	CTBP1	13	8	27	1	0	0	48	1	2.55333	YES
chr1	86046731	86047047	+	CYR61	7	7	83	1	0	0	97	1	2.55	YES
chr10	103868081	103868785	-	LDB1	84	68	115	10	7	2	267	19	2.54667	YES
chr15	75651495	75651668	-	MAN2C1	42	25	31	2	1	1	98	4	2.52	YES
chr5	74037435	74041502	-	GFM2	12	5	9	0	0	0	26	0	2.51333	YES
chr19	41119436	41119821	+	LTBP4	85	57	40	1	10	1	182	12	2.51	YES
chr12	13220231	13221237	+	KIAA1467	5	6	7	0	0	0	18	0	2.49	YES
chr2	74734275	74734702	-	PCGF1	9	10	28	0	0	1	47	1	2.48667	YES
chr11	71942234	71942541	+	INPPL1	69	33	50	3	2	1	152	6	2.48	YES
chr3	52724721	52724960	+	GNL3	12	12	14	0	2	2	38	4	2.48	YES
chr12	48529167	48531503	+	PFKM	23	11	17	1	2	1	51	4	2.48	YES
chrX	53222515	53222618	-	KDM5C	5	11	30	0	0	1	46	1	2.47667	YES
chr5	6742711	6743824	+	PAPD7	48	50	43	4	9	5	141	18	2.47333	YES
chr15	41817347	41819095	-	RPAP1	11	17	24	2	0	3	52	5	2.47	YES
chr12	49959999	49960504	-	MCRS1	29	9	22	4	1	0	60	5	2.46333	YES
chr22	50894012	50894644	-	SBF1	12	12	48	1	1	3	72	5	2.46	YES
chr7	8124648	8125822	+	GLCCI1	22	31	23	0	6	0	76	6	2.46	YES
chr8	145659663	145660193	-	NFKBIL2	5	8	45	0	1	0	58	1	2.44333	YES
chr11	47827865	47828621	-	NUP160	19	13	22	1	2	2	54	5	2.42667	YES
chr9	91965768	91972325	+	SECISBP2	37	31	26	7	5	3	94	15	2.39667	YES
chr12	113705762	113706546	+	TPCN1	33	24	41	0	3	0	98	3	2.35667	YES
chr7	100283703	100283802	-	GIGYF1	17	5	23	1	0	2	45	3	2.35333	YES
chr2	96858899	96858979	-	STARD7	9	12	6	0	0	0	27	0	2.35	YES
chr16	67231550	67231769	+	E2F4	10	12	21	0	2	0	43	2	2.35	YES
chr12	53666642	53668600	+	ESPL1	23	28	28	0	5	1	79	6	2.35	YES
chr3	49042604	49043150	+	P4HTM	28	31	13	0	0	0	72	0	2.34333	YES
chr11	47317131	47317447	+	MADD	10	9	8	0	0	0	27	0	2.34	YES
chr17	7837865	7838306	+	CNTROB	15	5	8	1	0	0	28	1	2.34	YES
chr7	151834010	151835880	-	MLL3	39	29	54	4	4	7	122	15	2.32667	YES
chr1	113242605	113242840	+	MOV10	39	25	14	0	0	0	78	0	2.31667	YES
chr1	24123638	24124184	-	GALE	14	8	16	0	0	1	38	1	2.31	YES
chr2	43518908	43519242	-	THADA	26	36	6	0	0	0	68	0	2.29333	YES
chr19	49458220	49458804	+	BAX	5	9	30	0	0	0	44	0	2.29333	YES
chr9	140080809	140081932	-	ANAPC2	55	29	110	3	5	2	194	10	2.29	YES
chr17	73567182	73567747	+	LLGL2	13	9	16	0	0	3	38	3	2.28333	YES
chr1	68947296	68949632	-	DEPDC1	63	67	35	10	8	1	165	19	2.28333	YES
chr1	41474387	41474465	+	CTPS	138	100	55	2	7	0	293	9	2.27333	YES
chr22	40805530	40805685	+	SGSM3	11	6	8	0	0	0	25	0	2.27333	YES
chr2	39085979	39088140	-	DHX57	9	5	12	0	0	0	26	0	2.26667	YES
chrX	24226488	24227016	+	ZFX	40	23	11	3	2	0	74	5	2.25333	YES
chr7	6178826	6179758	+	USP42	11	7	7	1	0	0	25	1	2.25333	YES
chr12	57036616	57037186	-	ATP5B	104	84	52	2	4	7	240	13	2.24667	YES
chr1	55534781	55537486	-	USP24	32	10	25	2	2	1	67	5	2.23333	YES
chr21	34045842	34050954	-	SYNJ1	18	20	16	0	2	2	54	4	2.22333	YES
chr3	48502199	48505143	+	ATRIP	22	13	21	2	1	1	56	4	2.20667	YES
chr9	14120624	14125630	-	NFIB	8	6	8	1	1	0	22	2	2.19667	YES
chr11	65358064	65359270	+	EHBP1L1	36	17	42	2	2	0	95	4	2.18	YES
chrX	153582096	153582282	-	FLNA	14	9	27	0	0	0	50	0	2.17333	YES
chr11	124971200	124972027	-	TMEM218	12	5	8	1	0	1	25	2	2.17	YES
chr4	672823	673702	+	MYL5	5	8	8	0	0	0	21	0	2.16667	YES
chr8	42176194	42176787	+	IKBKB	34	23	26	2	4	0	83	6	2.16333	YES
chr9	139279267	139281936	-	SNAPC4	22	10	42	1	1	3	74	5	2.14333	YES
chr18	55269719	55270043	-	NARS	56	50	32	2	1	0	138	3	2.14	YES
chr20	62317226	62318990	+	RTEL1	92	59	218	5	8	1	369	14	2.13333	YES
chr1	154231507	154232423	+	UBAP2L	10	12	23	0	2	0	45	2	2.12667	YES
chr19	50365139	50365300	-	PNKP	31	6	18	0	1	0	55	1	2.12333	YES
chr7	99707697	99707822	-	TAF6	32	16	15	0	0	0	63	0	2.12	YES
chr3	48621049	48621150	-	COL7A1	16	14	10	3	1	1	40	5	2.12	YES
chr1	46032693	46033653	+	AKR1A1	38	48	42	3	4	1	128	8	2.12	YES
chr11	9165033	9165643	-	DENND5A	6	8	14	1	1	0	28	2	2.12	YES
chr11	6638385	6638531	-	TPP1	22	24	9	1	0	0	55	1	2.11333	YES
chr6	136980517	136990420	-	MAP3K5	15	30	18	1	3	2	63	6	2.11	YES
chr4	160265212	160266257	+	RAPGEF2	14	8	7	2	1	1	29	4	2.11	YES
chr1	225599143	225600155	-	LBR	56	32	32	5	5	3	120	13	2.11	YES
chr11	57175370	57176647	-	SLC43A3	75	77	58	1	15	0	210	16	2.11	YES
chr12	69107589	69109406	+	NUP107	87	43	40	7	8	3	170	18	2.10333	YES
chr5	70858348	70860580	+	BDP1	8	5	8	0	1	0	21	1	2.09333	YES
chr11	108100051	108106396	+	ATM	14	13	6	0	1	0	33	1	2.08667	YES
chr3	51664405	51664720	+	RAD54L2	9	12	8	0	1	0	29	1	2.08667	YES
chr13	114549563	114550998	-	GAS6	7	25	7	1	2	0	39	3	2.08	YES
chr16	67863992	67864292	-	CENPT	76	20	71	3	3	1	167	7	2.06667	YES
chr11	67374548	67375866	+	NDUFV1	63	36	117	2	6	0	216	8	2.06333	YES
chr17	4445187	4445758	-	MYBBP1A	27	9	117	2	1	1	153	4	2.04667	YES
chr16	710715	711050	+	WDR90	6	5	17	1	0	1	28	2	2.04667	YES
chr10	127429771	127431626	+	C10orf137	42	32	32	1	3	6	106	10	2.04333	YES
chr4	1730515	1732613	+	TACC3	34	37	94	4	7	0	165	11	2.04	YES
chr2	242051855	242054457	-	PASK	29	26	39	5	5	0	94	10	2.04	YES
chr16	67862747	67863325	-	CENPT	18	11	27	0	1	2	56	3	2.02333	YES
chr10	116730200	116731893	+	TRUB1	8	10	9	1	0	1	27	2	2.01333	YES
chr2	242650904	242651392	+	ING5	22	7	8	0	1	0	37	1	2.01333	YES
chr15	42457312	42457915	-	VPS39	10	7	14	0	0	0	31	0	2.01333	YES
chr12	121017727	121018917	-	POP5	38	21	28	5	1	0	87	6	2.01	YES
chr11	763945	764287	+	TALDO1	5	5	11	0	0	0	21	0	2	YES
chr19	18239269	18239675	+	MAST3	27	30	12	0	2	0	69	2	1.99667	YES
chr20	2636861	2637046	+	NOP56	78	32	129	5	3	3	239	11	1.99333	YES
chr14	20917173	20917329	-	OSGEP	18	18	9	0	0	0	45	0	1.98667	YES
chr12	12976254	12976803	+	DDX47	49	38	37	1	6	3	124	10	1.98	YES
chr12	113726040	113726562	+	TPCN1	46	35	42	6	1	0	123	7	1.97667	YES
chr9	15465579	15466745	-	PSIP1	11	8	8	2	1	0	27	3	1.97333	YES
chr3	15455670	15457278	-	METTL6	6	5	7	0	0	1	18	1	1.97	YES
chr6	131924345	131925317	-	MED23	14	9	5	0	1	1	28	2	1.95667	YES
chr12	111956232	111957682	-	ATXN2	23	14	40	3	2	2	77	7	1.95667	YES
chr5	137495289	137495757	-	BRD8	9	25	7	0	4	0	41	4	1.95667	YES
chr16	2221607	2222191	+	TRAF7	25	6	44	1	1	1	75	3	1.95333	YES
chr16	28846721	28846869	+	ATXN2L	6	5	31	0	0	1	42	1	1.94333	YES
chr18	6982590	6983097	-	LAMA1	240	126	46	2	4	0	412	6	1.93	YES
chr20	2634040	2635059	+	NOP56	47	31	59	2	2	0	137	4	1.93	YES
chr1	185274776	185276145	-	IVNS1ABP	241	186	106	4	12	4	533	20	1.92333	YES
chr1	249149658	249149756	-	ZNF692	8	13	8	0	0	0	29	0	1.91667	YES
chr22	51018260	51018402	-	CHKB	10	14	14	1	0	0	38	1	1.91333	YES
chr6	43495944	43496565	-	XPO5	12	5	14	0	0	0	31	0	1.91333	YES
chr12	120594797	120595652	-	GCN1L1	47	23	52	0	2	2	122	4	1.91	YES
chr14	96997924	96998667	+	PAPOLA	33	9	19	0	1	0	61	1	1.9	YES
chr9	131258421	131260691	+	ODF2	9	7	11	0	1	0	27	1	1.88333	YES
chr2	242440212	242440892	-	STK25	20	8	42	4	1	0	70	5	1.88	YES
chrX	70348569	70348963	+	MED12	52	26	30	0	0	1	108	1	1.87333	YES
chr5	139915124	139916973	+	ANKHD1	36	16	32	2	1	0	84	3	1.87333	YES
chr17	8451727	8451961	-	MYH10	8	7	6	0	0	0	21	0	1.87333	YES
chr17	73221925	73222145	+	NUP85	14	8	26	0	0	0	48	0	1.87	YES
chr7	151900150	151902190	-	MLL3	10	6	6	0	1	1	22	2	1.87	YES
chr2	220466163	220466362	+	STK11IP	11	20	7	0	0	0	38	0	1.86	YES
chr15	41854917	41856381	+	TYRO3	7	9	15	0	1	1	31	2	1.86	YES
chr20	47585815	47587656	+	ARFGEF2	30	17	17	0	2	0	64	2	1.85333	YES
chr13	39600525	39602363	-	C13orf23	10	10	9	1	1	1	29	3	1.85	YES
chr3	25770810	25773809	-	NGLY1	20	13	9	4	1	0	42	5	1.83667	YES
chr13	73321250	73327827	+	C13orf34	18	15	6	3	2	1	39	6	1.83667	YES
chr10	134021656	134022537	-	STK32C	12	6	33	1	1	3	51	5	1.83333	YES
chr19	17449551	17449762	+	GTPBP3	27	6	26	1	0	0	59	1	1.83	YES
chr12	53580294	53581284	+	ZNF740	15	15	10	3	0	0	40	3	1.82667	YES
chr20	60887107	60887228	-	LAMA5	33	21	45	3	3	0	99	6	1.82333	YES
chr12	49089613	49089781	-	CCNT1	5	10	8	0	0	0	23	0	1.82	YES
chr3	49069707	49070054	-	QRICH1	9	8	11	0	0	0	28	0	1.81667	YES
chr8	103279236	103281205	-	UBR5	30	18	19	1	2	3	67	6	1.81	YES
chr2	242438200	242438403	-	STK25	13	9	28	0	0	0	50	0	1.80333	YES
chr11	66619418	66619909	-	PC	18	7	9	2	0	0	34	2	1.80333	YES
chr19	7622171	7623735	+	PNPLA6	17	17	30	1	3	0	64	4	1.80333	YES
chr3	49152551	49152660	-	USP19	6	6	15	0	0	0	27	0	1.79667	YES
chr19	46281132	46281384	-	DMPK	7	11	12	1	1	0	30	2	1.79333	YES
chr11	62482852	62482971	-	HNRNPUL2	7	6	9	0	0	0	22	0	1.78667	YES
chr2	220075198	220075432	-	ABCB6	31	20	15	0	0	0	66	0	1.78333	YES
chr20	19977487	19981256	+	RIN2	9	6	8	0	0	0	23	0	1.77333	YES
chr5	60837793	60839281	+	ZSWIM6	7	12	14	0	0	2	33	2	1.77	YES
chr17	7133475	7133603	-	DVL2	10	8	6	1	1	0	24	2	1.77	YES
chr17	40822724	40823011	-	PLEKHH3	5	5	11	0	0	2	21	2	1.77	YES
chr14	93728024	93730130	-	BTBD7	9	7	5	0	1	0	21	1	1.76667	YES
chr7	892305	892446	+	SUN1	31	6	17	0	1	0	54	1	1.76333	YES
chr7	1512023	1512707	-	INTS1	27	27	52	0	2	0	106	2	1.76	YES
chrX	47106819	47107009	+	USP11	25	16	22	0	1	0	63	1	1.75333	YES
chr3	49348171	49348946	-	USP4	12	7	7	0	0	0	26	0	1.75333	YES
chr19	18976976	18977329	+	UPF1	12	8	27	1	1	1	47	3	1.75	YES
chr20	60912784	60912859	-	LAMA5	30	32	38	0	2	0	100	2	1.74	YES
chr9	130670861	130672229	-	ST6GALNAC4	13	5	34	2	1	1	52	4	1.74	YES
chr10	101455880	101458290	+	ENTPD7	13	6	6	0	1	0	25	1	1.73667	YES
chr2	42511844	42513408	+	EML4	14	7	10	1	0	0	31	1	1.72333	YES
chr6	34847841	34848065	-	TAF11	12	8	8	0	0	0	28	0	1.72	YES
chr16	89650180	89650435	+	CPNE7	19	14	67	1	2	0	100	3	1.71667	YES
chr2	220078049	220078160	-	ABCB6	10	18	5	0	1	0	33	1	1.71	YES
chr2	86363686	86364104	+	PTCD3	9	6	22	1	0	1	37	2	1.70667	YES
chr15	75942915	75949302	+	SNX33	10	10	13	2	0	1	33	3	1.69667	YES
chr12	58021642	58021904	-	B4GALNT1	10	17	21	0	1	0	48	1	1.69	YES
chr1	6272477	6272741	+	RNF207	19	20	40	2	3	0	79	5	1.68	YES
chr17	56082962	56083161	-	SRSF1	97	82	68	2	4	8	247	14	1.67667	YES
chr16	4749178	4750970	-	ANKS3	14	13	35	1	1	1	62	3	1.67667	YES
chr16	67911749	67912068	+	EDC4	40	24	35	1	3	1	99	5	1.67	YES
chr10	113932077	113932727	-	GPAM	5	5	5	1	0	0	15	1	1.66333	YES
chr19	50105176	50117789	+	PRR12	12	6	26	2	1	1	44	4	1.66	YES
chr2	27425749	27426100	-	SLC5A6	33	31	25	2	2	0	89	4	1.65667	YES
chr16	2354152	2358450	-	ABCA3	35	21	33	0	1	2	89	3	1.65	YES
chr1	32793279	32794668	+	HDAC1	29	23	23	1	3	0	75	4	1.64	YES
chr10	103345914	103347002	-	POLL	5	6	13	1	1	0	24	2	1.64	YES
chr15	75182996	75183719	+	MPI	9	7	14	0	0	0	30	0	1.63333	YES
chr1	153924143	153924493	-	CRTC2	9	9	20	0	1	0	38	1	1.63	YES
chr6	122749102	122752574	+	HSF2	15	15	14	2	0	2	44	4	1.62667	YES
chr1	1328841	1330773	-	CCNL2	39	23	33	3	4	5	95	12	1.62333	YES
chr1	11190835	11193136	-	MTOR	33	23	34	3	3	3	90	9	1.62	YES
chr19	44235827	44237009	-	C19orf61	27	14	26	2	2	0	67	4	1.61667	YES
chr6	33659706	33660504	+	ITPR3	123	46	162	1	7	6	331	14	1.61	YES
chr2	32733327	32734804	+	BIRC6	27	27	14	1	0	2	68	3	1.59333	YES
chr3	52440393	52440844	-	BAP1	26	21	37	1	0	0	84	1	1.59	YES
chr1	43213989	43215856	-	LEPRE1	6	9	16	1	0	0	31	1	1.58333	YES
chr14	75572700	75573204	-	NEK9	28	16	5	1	2	0	49	3	1.58	YES
chr11	67939177	67941270	-	SUV420H1	7	7	11	1	0	0	25	1	1.58	YES
chr3	10343059	10345709	-	SEC13	6	5	14	1	1	0	25	2	1.58	YES
chr22	44368882	44369115	+	SAMM50	33	16	7	1	0	0	56	1	1.57667	YES
chr10	121336263	121336591	-	TIAL1	71	56	24	0	6	2	151	8	1.57667	YES
chr2	96933475	96933573	+	CIAO1	12	11	18	0	0	0	41	0	1.57	YES
chr20	61908004	61908556	+	ARFGAP1	62	37	47	5	1	1	146	7	1.56667	YES
chr3	48638274	48638407	-	UQCRC1	29	17	18	0	0	1	64	1	1.56333	YES
chr14	105846492	105847293	+	PACS2	11	6	13	0	0	0	30	0	1.55333	YES
chr3	50615307	50616251	+	HEMK1	6	10	6	1	0	0	22	1	1.55	YES
chr12	56574886	56575265	-	SMARCC2	72	35	39	3	5	0	146	8	1.54667	YES
chr17	42398600	42398801	-	SLC25A39	144	78	168	4	6	3	390	13	1.54333	YES
chr20	30193617	30193855	+	ID1	39	24	145	3	3	0	208	6	1.53667	YES
chr2	39509696	39513992	-	MAP4K3	24	25	15	3	3	3	64	9	1.53333	YES
chr10	99130839	99131829	-	RRP12	30	19	81	1	2	1	130	4	1.52	YES
chr21	45739299	45739966	+	PFKL	35	16	48	0	0	0	99	0	1.51667	YES
chr19	45854980	45855466	-	ERCC2	17	5	29	0	0	0	51	0	1.51	YES
chr20	33595444	33596466	-	TRPC4AP	51	43	19	1	1	0	113	2	1.50667	YES
chr10	103869801	103870285	-	LDB1	17	7	11	3	0	0	35	3	1.50333	YES
chr1	153719547	153719754	+	INTS3	44	31	14	3	1	0	89	4	1.5	YES
chrX	153225866	153226992	-	HCFC1	32	34	41	4	5	2	107	11	1.49333	YES
chr20	44592630	44594266	-	ZNF335	23	13	38	2	2	0	74	4	1.48333	YES
chr22	22324779	22326248	-	TOP3B	20	15	19	3	3	2	54	8	1.48333	YES
chr1	6605241	6609630	-	NOL9	74	62	54	9	5	1	190	15	1.48	YES
chr12	49171015	49171192	-	ADCY6	16	19	13	0	2	0	48	2	1.48	YES
chr1	150802457	150804293	-	ARNT	29	16	8	0	3	1	53	4	1.48	YES
chr12	53663870	53664161	+	ESPL1	10	9	23	0	1	0	42	1	1.47667	YES
chr19	17320519	17321141	+	MYO9B	26	12	37	2	2	2	75	6	1.47667	YES
chrX	153698955	153699447	+	PLXNA3	16	15	26	0	0	0	57	0	1.47333	YES
chr1	27689513	27689932	-	MAP3K6	20	8	12	0	1	0	40	1	1.46667	YES
chr16	418636	419067	-	MRPL28	11	6	22	0	0	0	39	0	1.46333	YES
chr3	148759456	148759952	-	HLTF	13	13	7	1	2	0	33	3	1.46	YES
chr1	201969144	201970503	+	RNPEP	15	11	8	1	2	0	34	3	1.45667	YES
chr1	150049310	150049746	+	VPS45	20	18	23	0	2	0	61	2	1.45333	YES
chr4	8237283	8238004	+	SH3TC1	5	8	6	0	1	0	19	1	1.45333	YES
chr15	91456637	91456843	+	MAN2A2	30	26	37	1	0	1	93	2	1.45	YES
chr6	161529892	161530786	+	MAP3K4	10	12	6	0	0	0	28	0	1.44667	YES
chr9	32974560	32984628	-	APTX	39	26	89	4	5	13	154	22	1.44667	YES
chr5	140075431	140075687	+	HARS2	31	24	8	2	0	1	63	3	1.44	YES
chr1	46733282	46736330	+	RAD54L	9	19	16	0	1	0	44	1	1.44	YES
chr12	1023288	1023596	-	RAD52	17	18	10	1	1	0	45	2	1.44	YES
chr6	90406294	90408583	-	MDN1	23	7	9	0	0	0	39	0	1.43333	YES
chrX	24761447	24763534	+	POLA1	34	35	34	1	7	1	103	9	1.43333	YES
chr16	28855423	28855550	-	TUFM	17	20	14	0	0	0	51	0	1.42667	YES
chr17	48456929	48457672	+	EME1	7	13	8	0	0	0	28	0	1.42667	YES
chr9	33468565	33468749	-	NOL6	19	9	14	0	1	0	42	1	1.42667	YES
chr1	44134971	44137175	+	KDM4A	12	19	18	1	2	0	49	3	1.42333	YES
chr1	111984012	111984646	-	WDR77	55	44	44	1	8	0	143	9	1.42	YES
chr18	47809732	47809884	-	CXXC1	15	15	19	0	0	0	49	0	1.41667	YES
chr9	90312120	90313570	+	DAPK1	9	6	7	0	0	0	22	0	1.41667	YES
chr10	103916832	103916945	+	NOLC1	31	12	28	2	1	0	71	3	1.41667	YES
chr17	80050896	80051094	-	FASN	32	10	56	0	0	1	98	1	1.40333	YES
chr11	134132517	134134801	+	ACAD8	8	9	9	1	1	1	26	3	1.4	YES
chr21	46603426	46604388	+	ADARB1	181	125	14	5	15	0	320	20	1.4	YES
chr20	62571660	62571730	-	UCKL1	6	5	13	0	1	0	24	1	1.4	YES
chr19	1111093	1111504	-	SBNO2	16	8	43	1	0	0	67	1	1.39667	YES
chr3	47047554	47047654	+	NBEAL2	8	5	6	0	0	0	19	0	1.39333	YES
chr11	12883862	12886384	+	TEAD1	149	86	119	18	17	5	354	40	1.39	YES
chr21	47831982	47832750	+	PCNT	29	9	19	0	0	1	57	1	1.38667	YES
chr11	126136818	126137069	-	SRPR	15	5	13	1	0	0	33	1	1.38333	YES
chr6	37429422	37429745	+	FTSJD2	15	23	5	0	1	0	43	1	1.38	YES
chr11	67066596	67067000	+	ANKRD13D	27	14	54	4	1	3	95	8	1.37667	YES
chr3	128890127	128890288	-	CNBP	14	12	9	1	0	0	35	1	1.37333	YES
chr16	70711803	70712154	-	MTSS1L	12	14	21	0	1	1	47	2	1.36667	YES
chr6	44200166	44200543	+	SLC29A1	15	8	13	0	0	1	36	1	1.35667	YES
chr14	74193676	74194160	-	C14orf43	7	8	20	0	0	1	35	1	1.35	YES
chr17	46048519	46048727	+	CDK5RAP3	11	7	16	0	1	0	34	1	1.35	YES
chr8	38801356	38803641	+	PLEKHA2	17	14	9	3	2	0	40	5	1.34667	YES
chr10	103919782	103919989	+	NOLC1	34	24	88	3	1	0	146	4	1.34	YES
chr2	27456405	27456493	+	CAD	17	7	23	0	0	0	47	0	1.34	YES
chrX	129155126	129156871	+	BCORL1	11	13	19	1	2	0	43	3	1.33333	YES
chr4	79236889	79238521	+	FRAS1	16	17	24	2	3	1	57	6	1.33333	YES
chr10	134038028	134038736	-	STK32C	24	13	50	1	1	0	87	2	1.33	YES
chr8	145011411	145012318	-	PLEC	52	45	126	6	4	0	223	10	1.32667	YES
chr1	161133772	161133953	+	USP21	17	8	14	2	1	0	39	3	1.32667	YES
chr7	66262494	66264309	+	RABGEF1	5	5	11	0	1	1	21	2	1.31667	YES
chr22	17626008	17629337	-	CECR5	10	12	42	0	1	3	64	4	1.31333	YES
chrX	153197569	153197768	-	NAA10	53	27	54	0	3	1	134	4	1.31333	YES
chr19	10668359	10668444	-	KRI1	6	9	27	0	0	1	42	1	1.31333	YES
chr11	9166661	9167216	-	DENND5A	11	5	5	2	1	1	21	4	1.31	YES
chr16	50346103	50346800	+	ADCY7	12	11	7	1	1	0	30	2	1.3	YES
chr17	7217041	7217224	-	GPS2	8	5	12	0	1	0	25	1	1.3	YES
chr19	2121879	2123356	-	AP3D1	27	21	39	2	1	0	87	3	1.29667	YES
chr12	56211897	56212782	+	ORMDL2	10	12	21	2	2	0	43	4	1.29333	YES
chr1	220327400	220330611	-	RAB3GAP2	10	29	10	0	1	1	49	2	1.28667	YES
chr19	7998456	7998748	-	TIMM44	15	6	32	2	0	2	53	4	1.28333	YES
chr19	47878966	47879180	+	DHX34	7	5	13	0	0	0	25	0	1.28333	YES
chr8	145140042	145140191	+	GPAA1	17	14	6	1	1	0	37	2	1.27667	YES
chr9	139326438	139326930	-	INPP5E	10	7	21	0	0	0	38	0	1.27667	YES
chr3	3188308	3189133	+	TRNT1	7	9	21	0	1	0	37	1	1.27	YES
chr11	34149147	34152359	+	NAT10	9	7	9	1	0	0	25	1	1.27	YES
chr3	9516841	9517166	+	SETD5	36	20	20	0	4	1	76	5	1.26667	YES
chr17	7132767	7132906	-	DVL2	30	17	11	2	0	2	58	4	1.26333	YES
chr9	33466424	33466566	-	NOL6	6	6	15	0	0	0	27	0	1.26333	YES
chr17	4084668	4085475	-	ANKFY1	12	8	10	0	0	0	30	0	1.26	YES
chrX	47039906	47040613	+	RBM10	20	11	29	3	1	0	60	4	1.25333	YES
chr20	60906186	60907427	-	LAMA5	238	167	230	20	30	4	635	54	1.25333	YES
chr19	44057061	44057133	-	XRCC1	7	5	10	0	0	0	22	0	1.25	YES
chr11	47745725	47746019	-	FNBP4	9	9	8	0	0	0	26	0	1.24667	YES
chr17	18148587	18148667	-	FLII	7	7	22	0	0	2	36	2	1.24667	YES
chr3	52510616	52511589	+	NISCH	7	6	7	0	0	1	20	1	1.24333	YES
chr17	73482508	73484012	+	KIAA0195	8	6	10	0	1	0	24	1	1.24	YES
chr6	33651946	33652133	+	ITPR3	10	13	25	0	0	1	48	1	1.23333	YES
chr7	26231959	26232114	-	HNRNPA2B1	205	163	164	15	31	16	532	62	1.23333	YES
chr17	43321393	43321542	+	FMNL1	14	17	9	0	2	0	40	2	1.22667	YES
chr1	55587180	55589119	-	USP24	25	10	18	2	2	2	53	6	1.22667	YES
chr2	113405042	113405229	+	SLC20A1	19	9	27	0	0	0	55	0	1.22333	YES
chr12	132416858	132423717	+	PUS1	52	27	50	4	5	3	129	12	1.22	YES
chr19	7592515	7592749	+	MCOLN1	7	8	8	0	0	0	23	0	1.20667	YES
chr17	73657789	73658558	-	RECQL5	6	7	7	1	1	0	20	2	1.20667	YES
chr16	1552406	1552645	+	TELO2	9	5	23	0	0	0	37	0	1.20333	YES
chr22	30886234	30887559	-	SEC14L4	5	7	6	0	0	1	18	1	1.2	YES
chr17	80206891	80207306	-	CSNK1D	22	8	24	0	1	0	54	1	1.19667	YES
chr9	140469296	140470531	-	WDR85	156	111	108	9	14	6	375	29	1.19667	YES
chr2	89028856	89034068	+	RPIA	7	7	7	1	1	1	21	3	1.19667	YES
chr1	109801702	109803663	+	CELSR2	5	6	13	0	1	0	24	1	1.19667	YES
chr1	57171892	57173147	+	PRKAA2	12	7	9	0	1	0	28	1	1.19333	YES
chr11	126110940	126120400	+	FAM118B	8	7	5	1	0	0	20	1	1.19333	YES
chr8	21958484	21958950	+	FAM160B2	7	6	8	1	0	0	21	1	1.19333	YES
chr11	68822266	68822642	+	TPCN2	11	15	15	0	0	0	41	0	1.18667	YES
chr11	63720038	63720227	+	NAA40	12	7	9	0	0	0	28	0	1.18333	YES
chr22	45731264	45732208	+	FAM118A	8	5	5	0	0	0	18	0	1.18333	YES
chr21	30414850	30415743	+	USP16	17	13	5	0	2	0	35	2	1.18	YES
chr1	17293067	17294697	+	CROCC	5	5	8	0	0	0	18	0	1.18	YES
chr15	89866743	89867045	-	POLG	9	27	23	1	4	0	59	5	1.17667	YES
chr3	48628250	48628896	-	COL7A1	60	24	78	3	4	1	162	8	1.17667	YES
chr5	176943449	176943725	-	DDX41	12	6	35	0	0	0	53	0	1.17667	YES
chr22	45607989	45608145	-	C22orf9	15	7	11	1	0	1	33	2	1.17333	YES
chr1	153907441	153908535	-	DENND4B	23	17	32	4	1	0	72	5	1.17	YES
chr4	44680805	44682457	+	GUF1	11	15	25	2	0	4	51	6	1.17	YES
chr11	126144917	126145221	+	FOXRED1	13	6	16	0	1	0	35	1	1.17	YES
chr3	180326599	180327417	+	TTC14	13	13	25	2	1	1	51	4	1.16667	YES
chr19	9054349	9056172	-	MUC16	7	10	8	0	1	0	25	1	1.16667	YES
chr19	33134538	33135230	-	ANKRD27	7	8	8	0	0	0	23	0	1.16667	YES
chr7	100280854	100280926	-	GIGYF1	9	5	9	0	0	0	23	0	1.16667	YES
chr11	93425197	93428662	+	KIAA1731	15	7	5	1	1	1	27	3	1.16333	YES
chr1	16246013	16247364	+	SPEN	12	8	10	0	1	2	30	3	1.16	YES
chr21	47697632	47699906	-	MCM3AP	35	32	49	5	0	3	116	8	1.15333	YES
chr17	73897355	73897792	-	MRPL38	30	13	35	1	1	1	78	3	1.15333	YES
chr15	43766966	43767762	-	TP53BP1	32	10	11	0	0	0	53	0	1.15	YES
chr20	57564077	57564542	+	TH1L	76	40	17	2	4	2	133	8	1.14667	YES
chr1	156534484	156535818	-	IQGAP3	51	38	31	4	4	1	120	9	1.14667	YES
chr1	1424655	1425636	+	ATAD3B	20	10	88	0	2	1	118	3	1.14667	YES
chr17	26512292	26518046	+	NLK	7	6	7	1	1	0	20	2	1.14333	YES
chr19	41114510	41115435	+	LTBP4	39	33	35	2	3	1	107	6	1.14	YES
chr2	27591007	27591238	-	EIF2B4	20	9	20	1	1	3	49	5	1.14	YES
chr20	60886364	60886456	-	LAMA5	10	7	37	0	1	0	54	1	1.14	YES
chr2	37286131	37287723	-	HEATR5B	16	20	15	1	3	0	51	4	1.14	YES
chr1	3385501	3385996	+	ARHGEF16	5	6	5	0	0	0	16	0	1.14	YES
chr5	37049404	37051880	+	NIPBL	17	5	8	2	0	1	30	3	1.13667	YES
chr1	151379108	151379386	-	POGZ	9	25	7	0	0	0	41	0	1.13333	YES
chr14	20825680	20825796	+	PARP2	12	7	6	0	0	0	25	0	1.13	YES
chr1	3551859	3552507	-	WDR8	34	8	8	0	0	0	50	0	1.12667	YES
chr3	47046081	47046461	+	NBEAL2	90	38	56	0	1	0	184	1	1.12333	YES
chr6	90460252	90461149	-	MDN1	13	5	7	2	0	0	25	2	1.12333	YES
chr1	44132227	44132624	+	KDM4A	12	5	5	1	0	0	22	1	1.12333	YES
chr11	126134435	126134853	-	SRPR	27	20	19	0	0	0	66	0	1.12	YES
chrX	153608380	153608593	+	EMD	19	7	19	1	0	0	45	1	1.12	YES
chr16	569025	569753	+	RAB11FIP3	16	6	24	3	1	0	46	4	1.12	YES
chr3	179470162	179472519	+	USP13	5	5	7	0	1	1	17	2	1.12	YES
chr11	66611836	66612339	+	RCE1	9	9	7	0	0	1	25	1	1.11333	YES
chr2	99788110	99790377	-	MITD1	10	12	11	1	1	2	33	4	1.11	YES
chr9	2827152	2828674	-	KIAA0020	54	92	44	7	13	2	190	22	1.11	YES
chr11	64029138	64029423	+	PLCB3	24	7	27	0	0	0	58	0	1.11	YES
chr2	55899182	55900027	-	PNPT1	26	22	59	2	4	3	107	9	1.11	YES
chr17	26966661	26966918	-	KIAA0100	21	16	14	0	0	0	51	0	1.1	YES
chr11	65320454	65320634	-	LTBP3	15	20	12	2	0	0	47	2	1.09667	YES
chr2	85785729	85786039	-	GGCX	26	30	9	0	4	0	65	4	1.09333	YES
chr16	1821173	1821280	-	NME3	24	20	14	1	2	0	58	3	1.09	YES
chr19	1918990	1923068	+	SCAMP4	18	16	46	3	2	1	80	6	1.08667	YES
chr12	112229224	112229864	+	ALDH2	12	5	13	0	0	0	30	0	1.08667	YES
chr19	36556918	36557158	+	WDR62	18	5	18	0	1	0	41	1	1.08333	YES
chr4	79205703	79207558	+	FRAS1	18	16	11	3	1	0	45	4	1.07667	YES
chr3	186508045	186508114	-	RFC4	33	20	5	2	3	0	58	5	1.07333	YES
chr15	40705287	40707087	+	IVD	34	17	15	1	1	3	66	5	1.07333	YES
chr17	42931004	42931636	-	EFTUD2	55	42	28	0	3	0	125	3	1.07333	YES
chr17	4789922	4790404	+	MINK1	15	5	22	0	1	0	42	1	1.07333	YES
chr17	80016293	80016656	-	DUS1L	40	33	81	4	3	1	154	8	1.06667	YES
chr6	33648227	33648326	+	ITPR3	7	8	24	0	0	0	39	0	1.06667	YES
chr14	23776489	23776968	+	BCL2L2	12	6	8	0	1	0	26	1	1.06667	YES
chr3	190345239	190347138	+	IL1RAP	6	8	6	1	1	0	20	2	1.06333	YES
chr3	48464357	48464913	-	PLXNB1	9	11	15	1	1	2	35	4	1.06	YES
chr17	62553841	62557617	-	SMURF2	13	11	6	0	2	1	30	3	1.06	YES
chr11	71940275	71940508	+	INPPL1	38	18	28	2	1	2	84	5	1.05667	YES
chrX	153670142	153670457	+	GDI1	16	7	11	0	1	2	34	3	1.05333	YES
chr6	131926626	131927618	-	MED23	8	11	10	0	0	0	29	0	1.05	YES
chr1	55523883	55524171	+	PCSK9	30	22	22	0	3	0	74	3	1.04667	YES
chr17	4621319	4621555	+	ARRB2	15	8	6	0	0	0	29	0	1.03667	YES
chr2	27446617	27446784	+	CAD	16	9	15	0	0	0	40	0	1.03333	YES
chr1	242013889	242015593	+	EXO1	27	25	15	1	1	0	67	2	1.03	YES
chr16	67983822	67984221	-	SLC12A4	12	9	25	0	0	0	46	0	1.02667	YES
chr3	47449446	47449834	+	PTPN23	35	7	32	0	1	0	74	1	1.02333	YES
chr16	27504618	27506083	-	GTF3C1	15	21	23	0	0	1	59	1	1.02	YES
chr7	87473179	87476263	-	SLC25A40	46	27	8	3	3	0	81	6	1.02	YES
chr12	122614177	122614487	+	MLXIP	13	8	8	0	1	0	29	1	1.02	YES
chr16	29814259	29814769	+	KIF22	6	8	9	1	0	0	23	1	1.02	YES
chr9	130569968	130570512	+	FPGS	9	7	10	0	0	0	26	0	1.01333	YES
chr5	148682090	148685868	+	AFAP1L1	13	8	15	0	0	0	36	0	1.01	YES
chr1	110592183	110592964	+	FAM40A	5	10	8	1	1	0	23	2	1.00667	YES
chr1	1562825	1563052	+	MIB2	7	9	10	0	0	0	26	0	1.00333	YES
chr12	49231441	49231724	-	DDX23	25	16	43	0	2	0	84	2	1.00333	YES
chr19	14521985	14522317	-	DDX39	27	16	58	0	0	1	101	1	1	YES
chr2	27261106	27261351	+	TMEM214	6	8	14	0	0	1	28	1	1	YES
chr11	8747757	8751496	-	ST5	7	6	11	0	1	0	24	1	1	YES
chr17	60107375	60108804	-	MED13	9	6	9	1	1	0	24	2	0.996667	YES
chr19	16987390	16988355	+	SIN3B	24	6	12	1	0	0	42	1	0.993333	YES
chr11	6499429	6499967	-	ARFIP2	40	29	40	6	5	0	109	11	0.993333	YES
chr17	79429073	79429765	+	BAHCC1	5	7	13	0	0	0	25	0	0.99	YES
chr9	34616111	34617881	-	DCTN3	11	12	7	1	0	0	30	1	0.99	YES
chr19	10262222	10262425	-	DNMT1	46	10	55	0	0	0	111	0	0.99	YES
chr17	62587268	62589557	-	SMURF2	11	6	10	2	0	1	27	3	0.986667	YES
chr5	1078874	1079512	-	SLC12A7	19	8	44	3	0	0	71	3	0.983333	YES
chr5	891403	891754	-	BRD9	12	5	56	0	0	0	73	0	0.976667	YES
chr13	51953709	51956164	-	INTS6	6	11	6	1	1	1	23	3	0.976667	YES
chr3	12627299	12629089	-	RAF1	57	40	73	10	7	7	170	24	0.973333	YES
chr21	33694255	33694787	-	URB1	43	33	37	1	5	0	113	6	0.966667	YES
chr1	145578480	145578636	+	PIAS3	11	12	6	0	0	0	29	0	0.96	YES
chr20	62319959	62320407	+	RTEL1	34	30	94	2	5	0	158	7	0.96	YES
chr16	69374236	69375082	+	NIP7	9	6	32	0	0	3	47	3	0.956667	YES
chr12	39069577	39071253	-	CPNE8	10	17	13	2	0	2	40	4	0.953333	YES
chr17	34871026	34871700	-	MYO19	49	45	25	7	4	0	119	11	0.953333	YES
chr19	12812487	12812565	-	TNPO2	11	8	18	0	0	0	37	0	0.953333	YES
chr6	83947550	83949257	-	ME1	33	21	13	0	0	0	67	0	0.95	YES
chr11	123598971	123599833	-	ZNF202	5	5	9	0	1	0	19	1	0.95	YES
chr8	33356796	33357845	-	C8orf41	6	5	6	0	1	0	17	1	0.946667	YES
chr9	140671297	140672333	+	EHMT1	36	16	20	4	1	0	72	5	0.946667	YES
chr15	35159811	35162952	-	AQR	7	9	12	0	0	0	28	0	0.946667	YES
chr4	47888017	47892629	-	NFXL1	36	11	14	3	2	0	61	5	0.946667	YES
chr1	97278485	97278584	+	PTBP2	27	18	9	0	0	0	54	0	0.943333	YES
chr7	45141214	45141423	-	TBRG4	23	17	44	4	0	0	84	4	0.94	YES
chr8	41397524	41399327	+	GINS4	17	9	25	0	0	2	51	2	0.94	YES
chr14	102515007	102515776	+	DYNC1H1	131	76	98	8	5	0	305	13	0.936667	YES
chr10	135113618	135116295	-	TUBGCP2	10	15	25	1	1	1	50	3	0.936667	YES
chr11	64034025	64034656	+	PLCB3	15	8	10	1	1	0	33	2	0.936667	YES
chr12	56637918	56638136	-	ANKRD52	27	5	14	0	0	0	46	0	0.936667	YES
chr15	91479213	91479514	+	UNC45A	15	14	17	0	2	0	46	2	0.933333	YES
chr13	37577145	37578652	+	EXOSC8	26	20	6	0	2	0	52	2	0.93	YES
chr6	119245293	119252584	-	MCM9	5	8	6	0	0	0	19	0	0.93	YES
chr10	74033819	74033914	+	DDIT4	9	7	19	1	1	0	35	2	0.93	YES
chr19	7996074	7997511	-	TIMM44	20	21	73	1	1	2	114	4	0.926667	YES
chr17	1580989	1581811	-	PRPF8	9	10	13	0	0	0	32	0	0.926667	YES
chr9	131760903	131761450	+	NUP188	33	7	11	0	0	0	51	0	0.926667	YES
chr15	101602896	101605556	+	LRRK1	27	14	78	5	2	3	119	10	0.923333	YES
chr11	64899823	64900202	-	SYVN1	33	17	24	0	3	0	74	3	0.92	YES
chr3	183907720	183908786	+	ABCF3	15	22	10	2	1	0	47	3	0.92	YES
chr17	80045911	80045991	-	FASN	28	21	53	0	0	0	102	0	0.92	YES
chr2	70443632	70444017	-	TIA1	9	19	8	0	3	0	36	3	0.92	YES
chr13	77798668	77799569	-	MYCBP2	9	13	8	0	1	0	30	1	0.916667	YES
chr7	6213365	6217453	-	CYTH3	15	7	6	2	0	0	28	2	0.916667	YES
chrX	47106621	47106702	+	USP11	8	6	7	0	1	0	21	1	0.916667	YES
chr12	52574393	52574686	-	KRT80	11	9	15	0	1	0	35	1	0.913333	YES
chrX	71822124	71822968	-	PHKA1	27	18	13	2	2	1	58	5	0.91	YES
chr8	141567336	141568583	-	EIF2C2	23	19	53	2	3	5	95	10	0.91	YES
chr17	26912672	26912881	-	SPAG5	37	22	18	3	1	0	77	4	0.906667	YES
chr3	196792320	196792578	-	DLG1	16	18	5	3	1	0	39	4	0.906667	YES
chr1	113238874	113239058	+	MOV10	53	24	31	0	4	0	108	4	0.906667	YES
chr1	52826222	52826645	-	CC2D1B	12	15	19	2	0	2	46	4	0.903333	YES
chr14	23239488	23239669	+	OXA1L	47	28	26	0	5	1	101	6	0.9	YES
chr20	62065257	62069977	-	KCNQ2	8	5	12	0	1	0	25	1	0.9	YES
chr7	141349134	141351324	+	AGK	29	22	35	2	2	1	86	5	0.896667	YES
chr19	13002337	13002644	+	GCDH	29	25	35	1	0	4	89	5	0.893333	YES
chr9	33464975	33465204	-	NOL6	12	7	25	0	1	3	44	4	0.893333	YES
chr19	47995377	47996217	-	NAPA	17	9	42	0	0	2	68	2	0.893333	YES
chr3	128623349	128624963	+	ACAD9	34	37	45	6	3	2	116	11	0.883333	YES
chr19	47768204	47769867	+	CCDC9	6	5	6	1	0	0	17	1	0.883333	YES
chr11	111591787	111592553	+	SIK2	31	14	9	6	2	0	54	8	0.88	YES
chr16	68265598	68265704	-	ESRP2	9	7	9	0	0	0	25	0	0.88	YES
chr1	146765407	146766090	+	CHD1L	12	5	5	0	0	0	22	0	0.88	YES
chr1	173953758	173961892	-	RC3H1	13	8	5	1	0	1	26	2	0.873333	YES
chr8	28645407	28651323	-	INTS9	5	5	7	0	0	1	17	1	0.873333	YES
chr12	49168302	49168473	-	ADCY6	10	17	11	1	0	0	38	1	0.873333	YES
chr5	179306198	179306627	-	TBC1D9B	12	8	24	0	0	0	44	0	0.87	YES
chrX	153135696	153135842	-	L1CAM	9	5	9	1	0	0	23	1	0.87	YES
chr20	60774314	60775738	+	GTPBP5	20	11	34	0	2	1	65	3	0.866667	YES
chr17	26960181	26960300	-	KIAA0100	16	5	15	1	0	0	36	1	0.863333	YES
chr16	29810069	29810295	+	KIF22	15	17	12	0	0	0	44	0	0.86	YES
chr4	155467366	155468162	-	PLRG1	10	15	5	0	1	1	30	2	0.86	YES
chr12	49435489	49435699	-	MLL2	14	16	29	1	1	3	59	5	0.86	YES
chr5	176523181	176523287	+	FGFR4	8	6	7	0	0	0	21	0	0.856667	YES
chr17	28811789	28817143	+	GOSR1	27	23	13	1	1	0	63	2	0.853333	YES
chr11	47196865	47197401	-	ARFGAP2	21	13	22	2	1	1	56	4	0.853333	YES
chr1	243493995	243504340	+	SDCCAG8	10	9	16	1	1	1	35	3	0.853333	YES
chr12	6958594	6958728	-	CDCA3	11	7	8	0	1	0	26	1	0.853333	YES
chr16	68264931	68265080	-	ESRP2	9	7	20	0	0	0	36	0	0.853333	YES
chr7	100482460	100482543	+	SRRT	6	5	33	0	1	0	44	1	0.853333	YES
chr17	78350764	78351561	+	RNF213	10	8	9	2	0	1	27	3	0.85	YES
chr16	1816144	1816220	+	MAPK8IP3	5	6	6	0	0	0	17	0	0.85	YES
chr9	133573015	133573548	+	EXOSC2	25	6	11	1	1	0	42	2	0.843333	YES
chr7	151842381	151843683	-	MLL3	24	20	14	0	3	2	58	5	0.843333	YES
chr17	8167920	8168212	+	PFAS	15	12	27	0	0	0	54	0	0.84	YES
chr20	57276215	57282178	+	NPEPL1	21	17	20	3	0	0	58	3	0.836667	YES
chr2	27258921	27259354	+	TMEM214	16	7	13	0	1	0	36	1	0.836667	YES
chr3	183885500	183885685	+	DVL3	10	6	9	0	0	0	25	0	0.836667	YES
chr8	42183616	42186641	+	IKBKB	23	16	21	4	2	1	60	7	0.836667	YES
chr5	819728	821975	-	ZDHHC11	12	13	21	2	1	0	46	3	0.833333	YES
chrX	153133914	153134015	-	L1CAM	14	6	9	0	0	0	29	0	0.826667	YES
chr19	18963881	18964060	+	UPF1	9	10	25	1	1	0	44	2	0.826667	YES
chr2	153494189	153496471	+	FMNL2	22	14	41	4	2	5	77	11	0.823333	YES
chr4	106164936	106180775	+	TET2	7	7	7	1	1	1	21	3	0.823333	YES
chr12	62785210	62785595	+	USP15	19	6	6	0	1	1	31	2	0.823333	YES
chr17	4799128	4799297	+	MINK1	7	14	13	0	0	0	34	0	0.82	YES
chr11	65425971	65426188	-	RELA	5	6	8	1	0	1	19	2	0.82	YES
chr20	62297433	62298821	+	RTEL1	5	10	13	0	2	2	28	4	0.82	YES
chr3	108301931	108303911	-	KIAA1524	11	11	8	2	0	0	30	2	0.816667	YES
chr12	110931037	110933816	-	VPS29	16	11	7	1	2	0	34	3	0.816667	YES
chr1	154226566	154227311	+	UBAP2L	79	46	61	5	6	4	186	15	0.813333	YES
chr3	57302516	57303568	+	APPL1	13	17	7	1	0	1	37	2	0.813333	YES
chr11	34156134	34156721	+	NAT10	18	12	16	2	1	0	46	3	0.813333	YES
chrX	70464321	70464639	-	ZMYM3	17	7	9	0	1	0	33	1	0.813333	YES
chr14	90764725	90767582	-	C14orf102	5	7	6	1	1	1	18	3	0.813333	YES
chr21	43171406	43176684	-	RIPK4	15	12	32	1	2	0	59	3	0.813333	YES
chr3	52562328	52562461	-	NT5DC2	6	5	9	0	1	0	20	1	0.813333	YES
chr20	2637542	2637726	+	NOP56	8	5	41	0	1	2	54	3	0.81	YES
chr16	4385395	4386725	+	GLIS2	10	10	17	1	0	0	37	1	0.81	YES
chr7	1523807	1524733	-	INTS1	39	17	85	3	2	0	141	5	0.806667	YES
chr9	131505025	131512894	-	ZER1	6	6	8	0	0	0	20	0	0.806667	YES
chr2	220500614	220501023	+	SLC4A3	5	8	7	0	0	0	20	0	0.803333	YES
chr3	12573159	12574160	+	TSEN2	23	15	32	4	2	0	70	6	0.796667	YES
chr11	709609	710421	+	EPS8L2	45	35	36	1	7	1	116	9	0.796667	YES
chr17	62498668	62499043	-	DDX5	11	6	14	1	1	2	31	4	0.793333	YES
chr17	40823577	40824103	-	PLEKHH3	20	23	35	4	3	0	78	7	0.79	YES
chr19	19035789	19037111	+	DDX49	6	7	34	0	0	0	47	0	0.786667	YES
chr14	24626848	24627106	+	RNF31	15	6	17	0	1	0	38	1	0.786667	YES
chrX	153580065	153580251	-	FLNA	22	12	55	3	0	2	89	5	0.783333	YES
chr12	58109754	58109874	+	OS9	15	28	9	0	0	0	52	0	0.78	YES
chr21	45540984	45542057	+	PWP2	9	6	36	1	0	0	51	1	0.78	YES
chr3	121388203	121395739	-	GOLGB1	13	5	10	2	1	0	28	3	0.78	YES
chr7	129945761	129946626	+	CPA4	475	321	182	32	41	0	978	73	0.776667	YES
chrX	48853770	48854565	-	GRIPAP1	6	15	7	1	3	1	28	5	0.773333	YES
chr16	89805698	89805885	-	FANCA	12	9	18	2	0	0	39	2	0.77	YES
chr17	43004447	43005393	-	KIF18B	16	16	53	2	0	1	85	3	0.766667	YES
chr1	201824052	201824251	+	IPO9	51	18	13	0	2	1	82	3	0.766667	YES
chr17	37881656	37881959	+	ERBB2	10	5	9	1	0	0	24	1	0.766667	YES
chr1	201839987	201840288	+	IPO9	10	9	6	2	1	1	25	4	0.766667	YES
chr2	96964159	96964340	-	SNRNP200	28	21	11	0	0	0	60	0	0.763333	YES
chr16	730685	731151	+	STUB1	42	13	72	4	1	0	127	5	0.763333	YES
chr14	102471021	102471098	+	DYNC1H1	38	33	7	1	4	0	78	5	0.763333	YES
chr1	211444652	211447551	+	RCOR3	62	27	20	4	5	2	109	11	0.76	YES
chr7	134881090	134882744	-	WDR91	14	12	12	1	0	1	38	2	0.76	YES
chr21	44317158	44323291	+	NDUFV3	60	80	36	11	16	3	176	30	0.76	YES
chr4	3123160	3124615	+	HTT	7	12	6	0	1	0	25	1	0.756667	YES
chr11	65302854	65303423	+	SCYL1	7	8	21	0	0	0	36	0	0.756667	YES
chr7	128595440	128597277	-	TNPO3	19	24	26	3	4	4	69	11	0.756667	YES
chrX	153578576	153579276	-	FLNA	42	33	96	1	5	2	171	8	0.753333	YES
chr16	67227074	67227374	+	E2F4	11	7	26	1	1	0	44	2	0.753333	YES
chr5	132223285	132223537	-	AFF4	8	7	10	0	0	1	25	1	0.75	YES
chr1	156508826	156509165	-	IQGAP3	13	11	15	1	2	0	39	3	0.75	YES
chr22	46793746	46794420	-	CELSR1	7	9	10	1	1	0	26	2	0.743333	YES
chr1	158061347	158063128	+	KIRREL	40	40	105	6	8	3	185	17	0.743333	YES
chr5	6604799	6605385	-	NSUN2	92	35	146	8	2	7	273	17	0.74	YES
chr12	19475602	19489448	+	PLEKHA5	5	9	6	0	0	0	20	0	0.74	YES
chr1	16528357	16528910	-	ARHGEF19	33	17	25	1	2	1	75	4	0.74	YES
chr6	90500121	90503480	-	MDN1	5	8	14	0	1	1	27	2	0.74	YES
chr15	56974676	56981238	-	ZNF280D	13	7	16	1	1	1	36	3	0.74	YES
chr6	33639084	33639805	+	ITPR3	73	49	171	3	8	6	293	17	0.736667	YES
chr11	113702716	113704141	-	USP28	22	6	14	3	0	1	42	4	0.736667	YES
chr1	147119369	147120047	-	ACP6	33	19	9	3	1	1	61	5	0.736667	YES
chr9	139310844	139311402	+	PMPCA	57	36	48	3	3	1	141	7	0.733333	YES
chr6	43480939	43481096	-	YIPF3	5	6	9	0	0	0	20	0	0.733333	YES
chr21	45217982	45219450	+	RRP1	28	16	80	1	3	2	124	6	0.733333	YES
chr15	50902159	50903289	-	TRPM7	28	15	16	4	2	0	59	6	0.73	YES
chr15	41030775	41032330	-	FAM82A2	15	7	31	2	1	1	53	4	0.73	YES
chr3	48453419	48453646	-	PLXNB1	34	16	9	0	0	0	59	0	0.73	YES
chr4	155462087	155463338	-	PLRG1	19	15	7	0	0	1	41	1	0.726667	YES
chr16	70287285	70287616	-	AARS	18	13	22	0	1	3	53	4	0.726667	YES
chr22	24437722	24439365	+	CABIN1	68	55	22	8	1	0	145	9	0.723333	YES
chr7	99220264	99221679	+	ZNF498	12	12	18	2	1	1	42	4	0.723333	YES
chr7	148769566	148771477	-	ZNF786	5	6	6	0	1	0	17	1	0.723333	YES
chr8	23290668	23291829	-	ENTPD4	11	8	21	2	1	0	40	3	0.72	YES
chr11	108181043	108183137	+	ATM	8	11	5	1	0	0	24	1	0.72	YES
chr1	53333311	53333398	+	ZYG11A	5	7	5	0	0	0	17	0	0.72	YES
chr1	222833000	222833075	+	MIA3	10	15	5	0	1	0	30	1	0.716667	YES
chr2	201719419	201719726	-	CLK1	17	11	9	0	1	0	37	1	0.716667	YES
chr1	22837841	22838168	+	ZBTB40	6	6	9	0	0	0	21	0	0.713333	YES
chr3	49738143	49738923	+	RNF123	12	5	33	0	0	0	50	0	0.713333	YES
chr11	66131896	66133406	-	SLC29A2	25	21	25	0	3	2	71	5	0.71	YES
chr8	41386916	41387702	+	GINS4	8	8	10	0	0	0	26	0	0.71	YES
chrX	153995658	153996576	+	DKC1	22	13	16	2	2	0	51	4	0.71	YES
chr1	153733395	153734045	+	INTS3	80	67	13	3	0	0	160	3	0.706667	YES
chr16	56913140	56913453	+	SLC12A3	60	36	13	3	0	0	109	3	0.703333	YES
chr3	195974390	195975077	-	PCYT1A	13	14	15	1	1	1	42	3	0.703333	YES
chr17	37814280	37814657	+	STARD3	22	10	14	0	1	0	46	1	0.703333	YES
chr17	7126185	7126451	+	ACADVL	306	176	229	1	9	5	711	15	0.7	YES
chr16	88791928	88792002	-	FAM38A	23	21	36	4	2	0	80	6	0.7	YES
chr1	982338	982706	+	AGRN	124	50	120	2	3	3	294	8	0.696667	YES
chr19	19243564	19243938	-	TMEM161A	10	13	28	2	0	0	51	2	0.696667	YES
chr1	985710	985806	+	AGRN	10	11	31	0	0	1	52	1	0.696667	YES
chr17	27000529	27001300	+	SUPT6H	6	7	21	0	1	1	34	2	0.696667	YES
chr16	22278198	22284946	+	EEF2K	11	13	15	1	1	1	39	3	0.693333	YES
chr1	38048538	38049467	-	GNL2	23	20	25	0	2	1	68	3	0.693333	YES
chr10	114200454	114201949	-	ZDHHC6	14	20	15	2	4	3	49	9	0.693333	YES
chr21	45509815	45511803	+	TRAPPC10	14	5	7	0	1	0	26	1	0.693333	YES
chr17	20906387	20907514	-	USP22	6	5	19	1	0	0	30	1	0.693333	YES
chr1	222886285	222889025	+	C1orf58	16	9	19	0	1	0	44	1	0.686667	YES
chr9	130550972	130551456	+	CDK9	19	8	16	0	1	0	43	1	0.686667	YES
chr20	57561919	57562762	+	TH1L	33	30	11	4	4	0	74	8	0.686667	YES
chr12	100612365	100613785	+	ACTR6	12	11	5	0	2	1	28	3	0.686667	YES
chr11	117265908	117266262	+	CEP164	26	6	24	0	0	2	56	2	0.68	YES
chr6	152632009	152637983	-	SYNE1	9	6	8	1	0	0	23	1	0.68	YES
chr17	38548364	38548469	-	TOP2A	21	13	7	0	0	0	41	0	0.676667	YES
chr5	86704004	86705106	-	CCNH	8	9	9	1	0	0	26	1	0.673333	YES
chr19	4941641	4941756	+	UHRF1	12	7	16	0	0	0	35	0	0.673333	YES
chr12	10373158	10374385	+	GABARAPL1	38	22	14	6	2	0	74	8	0.67	YES
chr1	206904608	206904984	+	MAPKAPK2	13	9	9	2	0	0	31	2	0.67	YES
chr7	139724686	139725996	-	PARP12	12	7	19	1	0	3	38	4	0.67	YES
chr2	220044486	220044831	+	FAM134A	8	5	7	1	1	0	20	2	0.67	YES
chr7	128657111	128658010	-	TNPO3	31	16	15	3	1	1	62	5	0.666667	YES
chr9	131398047	131398559	-	WDR34	27	31	32	2	3	0	90	5	0.666667	YES
chr7	99709453	99709544	-	TAF6	8	6	5	0	1	0	19	1	0.666667	YES
chr4	106164085	106164726	+	TET2	10	5	5	0	1	0	20	1	0.663333	YES
chr12	9094537	9095011	-	M6PR	9	12	11	0	1	2	32	3	0.66	YES
chr22	21106044	21107190	-	PI4KA	7	18	15	0	2	0	40	2	0.66	YES
chr1	104080107	104083971	+	RNPC3	24	25	5	3	3	0	54	6	0.66	YES
chr3	126737372	126739044	+	PLXNA1	27	11	53	2	2	1	91	5	0.66	YES
chr17	79180672	79180924	-	AZI1	6	10	10	0	1	0	26	1	0.656667	YES
chr16	2333360	2334279	-	ABCA3	23	7	31	0	0	1	61	1	0.656667	YES
chr12	6442314	6442532	-	TNFRSF1A	15	5	8	2	0	0	28	2	0.653333	YES
chr10	7213019	7213856	-	SFMBT2	8	9	6	0	0	1	23	1	0.653333	YES
chr6	151334957	151336015	+	MTHFD1L	26	16	16	2	3	0	58	5	0.653333	YES
chr3	47889447	47889669	+	DHX30	24	12	28	0	2	0	64	2	0.65	YES
chr2	37267662	37268275	-	HEATR5B	15	11	5	0	0	0	31	0	0.65	YES
chr10	70514585	70515126	+	CCAR1	8	10	5	0	1	0	23	1	0.65	YES
chr19	12822428	12825634	-	TNPO2	10	6	39	1	1	0	55	2	0.65	YES
chr2	55750959	55756013	+	CCDC104	15	6	5	1	0	0	26	1	0.65	YES
chr21	47766123	47766656	+	PCNT	23	15	25	4	3	0	63	7	0.65	YES
chr20	34220157	34220232	-	CPNE1	16	13	10	0	1	0	39	1	0.646667	YES
chr16	69729283	69730262	+	NFAT5	7	13	12	0	0	0	32	0	0.646667	YES
chr11	68564402	68566685	-	CPT1A	83	97	98	5	16	2	278	23	0.646667	YES
chr14	102348609	102349593	+	PPP2R5C	35	36	20	3	2	0	91	5	0.646667	YES
chr12	65637250	65639448	+	LEMD3	5	5	10	0	1	0	20	1	0.643333	YES
chr4	88053017	88053422	+	AFF1	17	8	10	2	0	0	35	2	0.64	YES
chr17	1968974	1972071	-	SMG6	6	15	9	0	2	0	30	2	0.64	YES
chr7	1535190	1535791	-	INTS1	31	28	47	0	2	3	106	5	0.636667	YES
chr11	129753102	129753964	-	NFRKB	13	9	13	0	0	0	35	0	0.636667	YES
chr20	60898913	60899135	-	LAMA5	7	6	20	0	1	0	33	1	0.636667	YES
chr1	183520326	183520952	+	SMG7	10	9	9	0	0	1	28	1	0.636667	YES
chr4	1332406	1332861	+	MAEA	5	10	8	0	1	0	23	1	0.633333	YES
chr8	19218826	19221582	+	SH2D4A	44	36	34	1	0	0	114	1	0.633333	YES
chr1	153744917	153745114	+	INTS3	67	27	33	2	1	0	127	3	0.633333	YES
chr19	14520686	14521027	-	DDX39	96	54	172	6	4	1	322	11	0.633333	YES
chr1	978838	978917	+	AGRN	8	7	36	0	0	0	51	0	0.633333	YES
chr11	724830	725727	+	EPS8L2	41	15	23	0	0	0	79	0	0.63	YES
chr10	75530230	75530466	+	SEC24C	21	12	9	0	0	1	42	1	0.626667	YES
chr17	2597334	2597416	-	KIAA0664	9	7	20	0	0	0	36	0	0.626667	YES
chr3	183962510	183962985	-	ALG3	16	20	36	3	3	0	72	6	0.626667	YES
chr22	46749765	46751340	+	TRMU	23	10	73	2	2	0	106	4	0.623333	YES
chr12	133237751	133238112	-	POLE	45	53	47	1	6	2	145	9	0.623333	YES
chr5	94848323	94849274	-	TTC37	24	15	11	0	2	0	50	2	0.623333	YES
chr17	8109958	8110067	-	AURKB	13	5	25	0	0	0	43	0	0.62	YES
chr4	83346037	83347189	-	HNRPDL	285	258	87	14	24	8	630	46	0.62	YES
chrX	153695815	153695887	+	PLXNA3	6	6	8	0	0	1	20	1	0.62	YES
chr13	113974786	113975718	+	LAMP1	36	17	42	0	3	1	95	4	0.62	YES
chr10	134010606	134011918	+	DPYSL4	11	5	16	2	0	2	32	4	0.62	YES
chr10	104158622	104159044	+	NFKB2	10	13	8	0	0	0	31	0	0.616667	YES
chr7	100855232	100855533	-	PLOD3	12	10	36	0	1	0	58	1	0.616667	YES
chr19	1057084	1057312	+	ABCA7	29	8	12	0	0	0	49	0	0.616667	YES
chr12	50045996	50047008	-	FMNL3	5	8	10	0	1	0	23	1	0.613333	YES
chr19	46027136	46027354	+	VASP	11	7	9	1	0	0	27	1	0.613333	YES
chr2	96935094	96936848	+	CIAO1	5	8	8	1	1	0	21	2	0.613333	YES
chr1	145518273	145522513	+	PEX11B	13	7	5	2	1	0	25	3	0.613333	YES
chr17	80041302	80041392	-	FASN	12	8	14	0	0	1	34	1	0.61	YES
chr17	40720578	40720854	+	MLX	36	13	25	0	2	0	74	2	0.61	YES
chr16	28845737	28845826	+	ATXN2L	11	13	10	0	0	1	34	1	0.606667	YES
chr17	3968124	3969740	-	ZZEF1	9	11	8	0	1	0	28	1	0.606667	YES
chr1	109756751	109757168	+	SARS	15	8	29	2	0	1	52	3	0.606667	YES
chr20	34263125	34268658	-	NFS1	32	44	33	1	6	4	109	11	0.606667	YES
chr17	27074966	27075034	+	TRAF4	9	9	9	0	0	0	27	0	0.603333	YES
chr1	22176992	22178038	-	HSPG2	33	12	24	3	1	0	69	4	0.6	YES
chr16	2373690	2374404	-	ABCA3	12	8	16	2	0	1	36	3	0.6	YES
chr8	23056962	23057398	-	TNFRSF10A	7	6	15	1	0	2	28	3	0.6	YES
chr15	41641440	41643185	+	NUSAP1	55	48	15	1	3	0	118	4	0.596667	YES
chr17	80013099	80013615	+	GPS1	17	19	37	0	0	0	73	0	0.593333	YES
chr11	57100624	57100908	-	SSRP1	12	7	15	0	0	0	34	0	0.593333	YES
chr7	102967132	102968102	-	DNAJC2	21	26	13	0	1	0	60	1	0.59	YES
chr5	61826613	61832528	+	IPO11	10	8	9	0	1	0	27	1	0.59	YES
chr17	79870491	79871649	-	SIRT7	16	10	25	2	2	0	51	4	0.586667	YES
chr19	48640946	48643227	-	LIG1	111	82	144	16	12	0	337	28	0.583333	YES
chr3	136665138	136667100	+	NCK1	10	13	6	2	0	0	29	2	0.583333	YES
chr1	93671189	93672663	+	CCDC18	7	7	9	0	1	0	23	1	0.583333	YES
chr7	6210946	6213283	-	CYTH3	19	21	39	2	4	2	79	8	0.583333	YES
chr17	27896378	27898608	+	TP53I13	5	5	18	0	0	1	28	1	0.583333	YES
chr2	27551799	27551987	-	GTF3C2	17	15	30	0	2	0	62	2	0.58	YES
chr7	94157563	94162516	+	CASD1	10	10	10	0	2	0	30	2	0.58	YES
chr19	17448474	17448816	+	GTPBP3	5	7	23	1	0	0	35	1	0.576667	YES
chr8	145533583	145534859	+	HSF1	48	22	101	6	1	1	171	8	0.576667	YES
chr17	73732776	73733402	+	ITGB4	22	24	29	1	2	0	75	3	0.573333	YES
chr19	805188	806407	+	PTBP1	95	55	252	5	5	5	402	15	0.573333	YES
chr17	38325700	38325850	+	CASC3	6	8	6	0	0	1	20	1	0.573333	YES
chr7	127229649	127230119	+	ARF5	15	6	11	3	1	0	32	4	0.573333	YES
chr20	62292850	62293202	+	RTEL1	10	6	20	1	0	2	36	3	0.57	YES
chr20	61438958	61439598	+	OGFR	8	5	36	1	0	2	49	3	0.57	YES
chr12	121879037	121879959	-	KDM2B	8	11	14	0	2	0	33	2	0.566667	YES
chr19	4442339	4442921	+	CHAF1A	10	18	68	0	1	1	96	2	0.566667	YES
chr1	249150146	249150486	-	ZNF692	27	18	48	3	3	0	93	6	0.566667	YES
chr3	14188880	14189407	-	XPC	14	17	6	0	3	0	37	3	0.566667	YES
chr5	179048037	179048242	-	HNRNPH1	209	117	122	7	14	3	448	24	0.563333	YES
chr6	152553401	152554915	-	SYNE1	15	8	5	0	1	0	28	1	0.563333	YES
chr17	46925529	46925683	+	CALCOCO2	12	7	7	2	0	0	26	2	0.563333	YES
chr9	6981119	6984165	+	KDM4C	39	34	29	4	6	0	102	10	0.563333	YES
chr19	9002674	9003292	-	MUC16	27	11	11	2	2	0	49	4	0.563333	YES
chr1	153911522	153912064	-	DENND4B	12	15	36	1	0	1	63	2	0.56	YES
chr12	48180487	48181494	-	HDAC7	5	7	12	0	1	0	24	1	0.56	YES
chr17	80019230	80019493	-	DUS1L	6	7	10	0	0	0	23	0	0.56	YES
chr12	122727056	122729115	-	VPS33A	6	6	8	1	0	0	20	1	0.56	YES
chr12	46758340	46758426	-	SLC38A2	16	12	8	3	0	0	36	3	0.556667	YES
chr13	21555788	21557362	-	LATS2	18	10	11	0	0	0	39	0	0.556667	YES
chr9	15453204	15457957	+	SNAPC3	13	19	18	1	3	3	50	7	0.556667	YES
chr5	147774468	147778561	+	FBXO38	20	16	17	3	3	2	53	8	0.556667	YES
chr12	56720744	56721147	-	PAN2	8	11	8	1	0	0	27	1	0.556667	YES
chr16	1545625	1547036	+	TELO2	32	26	63	1	5	4	121	10	0.556667	YES
chr11	34982066	34988186	+	PDHX	8	10	12	1	0	0	30	1	0.553333	YES
chr17	79526443	79532530	-	NPLOC4	82	51	53	6	7	5	186	18	0.553333	YES
chrX	153761344	153761790	-	G6PD	9	13	11	0	0	0	33	0	0.55	YES
chr17	2238191	2238553	-	TSR1	13	7	16	0	1	0	36	1	0.55	YES
chr20	34219096	34219189	-	CPNE1	21	6	6	1	0	0	33	1	0.55	YES
chr20	34218413	34218662	-	CPNE1	68	30	43	5	4	3	141	12	0.546667	YES
chr2	209138458	209141435	+	PIKFYVE	19	14	12	2	2	1	45	5	0.546667	YES
chr3	121491561	121500589	-	IQCB1	20	11	17	4	2	0	48	6	0.546667	YES
chr1	156502899	156503564	-	IQGAP3	11	6	26	0	1	0	43	1	0.546667	YES
chr10	104160249	104160411	+	NFKB2	23	34	20	2	1	2	77	5	0.543333	YES
chr8	68076744	68084650	+	CSPP1	14	34	12	2	3	0	60	5	0.543333	YES
chr11	10821304	10821636	-	EIF4G2	56	41	31	4	3	4	128	11	0.54	YES
chr14	71051661	71052472	-	MED6	11	12	12	1	1	1	35	3	0.54	YES
chr12	109945541	109947400	+	UBE3B	14	12	9	0	0	0	35	0	0.54	YES
chr10	3185694	3186483	-	PITRM1	16	15	15	1	2	0	46	3	0.54	YES
chr17	27237388	27238129	-	PHF12	12	6	11	0	1	0	29	1	0.54	YES
chr14	20942735	20942931	+	PNP	6	11	6	0	2	0	23	2	0.54	YES
chr6	79911444	79911992	-	HMGN3	93	127	15	3	7	1	235	11	0.533333	YES
chr10	99221380	99221584	-	MMS19	12	7	6	0	0	0	25	0	0.533333	YES
chr14	71500754	71502781	+	PCNX	12	6	6	2	1	0	24	3	0.533333	YES
chr8	41467475	41468254	+	AGPAT6	34	16	19	1	1	1	69	3	0.53	YES
chr4	123109244	123111154	+	KIAA1109	32	25	10	1	5	0	67	6	0.53	YES
chr19	47984291	47986417	-	KPTN	10	12	11	2	1	0	33	3	0.526667	YES
chr1	156498403	156498707	-	IQGAP3	22	10	27	4	0	0	59	4	0.526667	YES
chr19	47587713	47588312	-	ZC3H4	6	7	29	0	0	0	42	0	0.526667	YES
chr19	10506020	10506110	-	CDC37	22	23	127	1	4	1	172	6	0.526667	YES
chr8	141754867	141756858	-	PTK2	36	20	17	5	4	0	73	9	0.526667	YES
chr11	71944567	71944698	+	INPPL1	60	56	31	0	1	0	147	1	0.523333	YES
chr14	24654187	24654388	-	IPO4	18	7	41	0	1	0	66	1	0.523333	YES
chr2	180014122	180016004	-	SESTD1	6	5	6	1	0	0	17	1	0.523333	YES
chr12	49418730	49419964	-	MLL2	25	11	14	1	0	1	50	2	0.52	YES
chr19	11141570	11143965	+	SMARCA4	53	27	104	8	3	6	184	17	0.52	YES
chr17	33430564	33433404	-	RAD51L3	8	5	10	1	0	0	23	1	0.52	YES
chr17	80045130	80045200	-	FASN	14	12	16	0	0	0	42	0	0.516667	YES
chr7	158715241	158716261	+	WDR60	13	10	13	0	0	0	36	0	0.516667	YES
chr1	44072130	44072484	+	PTPRF	32	11	79	3	2	1	122	6	0.516667	YES
chr19	38610523	38621137	+	SIPA1L3	11	5	14	0	0	0	30	0	0.516667	YES
chr12	56814919	56815134	-	TIMELESS	23	17	27	0	3	0	67	3	0.516667	YES
chr9	139405724	139407472	-	NOTCH1	9	15	27	1	1	0	51	2	0.513333	YES
chr2	128927965	128928778	+	UGGT1	19	14	7	1	1	0	40	2	0.513333	YES
chr4	1741730	1742552	+	TACC3	6	14	33	1	1	0	53	2	0.513333	YES
chr2	27259655	27259944	+	TMEM214	17	13	27	2	1	1	57	4	0.513333	YES
chr2	192548531	192548955	+	OBFC2A	17	10	7	0	1	1	34	2	0.513333	YES
chr15	76235996	76248272	-	NRG4	17	17	26	3	2	2	60	7	0.513333	YES
chrX	107863657	107865032	+	COL4A5	11	17	6	2	2	0	34	4	0.513333	YES
chr12	4628047	4634419	-	C12orf4	16	5	21	3	0	3	42	6	0.513333	YES
chr11	62445107	62445252	-	UBXN1	18	8	8	0	1	0	34	1	0.51	YES
chr19	12826554	12829842	-	TNPO2	16	13	28	1	2	3	57	6	0.51	YES
chr7	150814865	150815296	+	AGAP3	32	32	37	1	5	0	101	6	0.51	YES
chr16	58048231	58051237	+	C16orf57	15	6	14	2	0	1	35	3	0.51	YES
chr15	90767221	90768199	+	SEMA4B	5	6	16	0	0	0	27	0	0.51	YES
chr7	107543993	107545402	+	DLD	74	56	27	5	9	4	157	18	0.506667	YES
chr11	61188046	61188861	-	CPSF7	67	56	45	7	9	3	168	19	0.506667	YES
chr11	71941316	71941405	+	INPPL1	14	11	12	2	1	0	37	3	0.503333	YES
chr3	142168445	142171969	-	ATR	21	9	17	2	0	2	47	4	0.503333	YES
chr1	205767180	205767796	-	SLC41A1	16	20	12	0	1	0	48	1	0.5	YES
chr2	220466438	220466709	+	STK11IP	16	14	8	0	0	0	38	0	0.5	YES
chr8	87557067	87558822	+	CPNE3	10	5	8	0	1	0	23	1	0.5	YES
chr6	7211182	7211805	+	RREB1	11	8	6	1	0	0	25	1	0.496667	YES
chr4	144461649	144464661	+	SMARCA5	7	7	15	1	1	1	29	3	0.496667	YES
chr5	137504378	137504910	-	BRD8	15	14	11	0	1	0	40	1	0.493333	YES
chr11	62365863	62365993	-	MTA2	13	17	21	0	1	0	51	1	0.493333	YES
chr9	131386767	131387381	+	SPTAN1	89	80	61	2	9	0	230	11	0.493333	YES
chr1	12401943	12402955	+	VPS13D	12	27	5	1	2	0	44	3	0.486667	YES
chr12	122999775	123001773	-	RSRC2	15	10	21	1	2	0	46	3	0.486667	YES
chr3	53215749	53217136	+	PRKCD	15	5	11	2	1	0	31	3	0.486667	YES
chr1	6604983	6605104	-	NOL9	8	8	9	0	0	0	25	0	0.483333	YES
chr14	103187715	103188523	+	RCOR1	10	7	10	0	1	2	27	3	0.483333	YES
chr4	151827558	151829485	-	LRBA	10	7	8	0	1	0	25	1	0.483333	YES
chr10	99228862	99229402	-	MMS19	6	12	8	0	0	1	26	1	0.48	YES
chrX	153593855	153594391	-	FLNA	46	10	121	0	1	1	177	2	0.48	YES
chr17	80043279	80043357	-	FASN	24	7	36	2	0	0	67	2	0.48	YES
chr1	160187499	160188113	-	DCAF8	6	15	7	0	1	0	28	1	0.476667	YES
chrX	48895968	48896631	-	TFE3	8	13	9	0	2	1	30	3	0.476667	YES
chr20	43533773	43534641	+	YWHAB	10	5	11	1	1	0	26	2	0.476667	YES
chr1	28861893	28862382	+	RCC1	6	5	5	1	0	0	16	1	0.476667	YES
chr12	6959023	6959630	-	CDCA3	7	8	6	1	1	0	21	2	0.476667	YES
chr2	27261401	27261569	+	TMEM214	9	11	7	0	0	0	27	0	0.473333	YES
chr11	92901338	92913962	-	SLC36A4	9	9	13	0	1	0	31	1	0.473333	YES
chr1	113235552	113236639	+	MOV10	52	67	63	10	9	2	182	21	0.47	YES
chr1	155764943	155774739	-	GON4L	14	12	6	0	1	1	32	2	0.47	YES
chr16	89713123	89713610	-	CHMP1A	9	11	25	0	1	1	45	2	0.47	YES
chr5	153429578	153432479	+	MFAP3	7	12	21	0	1	3	40	4	0.466667	YES
chrX	48434993	48435413	+	RBM3	17	11	19	0	1	1	47	2	0.466667	YES
chr9	35684548	35685060	-	TPM2	188	73	185	7	7	0	446	14	0.466667	YES
chr17	2239435	2239624	-	TSR1	17	10	25	3	1	1	52	5	0.466667	YES
chr11	3700939	3704429	-	NUP98	7	5	6	0	0	0	18	0	0.466667	YES
chr11	71941513	71941839	+	INPPL1	17	6	24	0	1	0	47	1	0.466667	YES
chr8	22472515	22472937	+	KIAA1967	18	6	28	1	0	1	52	2	0.466667	YES
chr9	131028161	131028248	-	GOLGA2	6	6	11	0	0	0	23	0	0.466667	YES
chr2	32626454	32626530	+	BIRC6	11	7	11	0	0	0	29	0	0.463333	YES
chr11	47843374	47843638	-	NUP160	24	15	6	2	1	0	45	3	0.46	YES
chr19	40486054	40486192	+	PSMC4	22	14	44	0	0	3	80	3	0.46	YES
chr16	1836957	1837677	+	NUBP2	8	9	25	0	0	3	42	3	0.46	YES
chr20	62323191	62324157	+	RTEL1	13	14	53	1	0	0	80	1	0.456667	YES
chr22	36886315	36889679	-	FOXRED2	6	12	12	1	0	0	30	1	0.456667	YES
chr7	73604249	73604576	+	EIF4H	62	25	17	2	4	1	104	7	0.456667	YES
chr17	1381487	1381703	-	MYO1C	21	5	10	0	1	0	36	1	0.456667	YES
chr15	41340475	41341484	-	INO80	7	5	6	0	1	0	18	1	0.456667	YES
chr16	88793052	88793122	-	FAM38A	14	5	9	0	0	0	28	0	0.456667	YES
chr16	74506310	74508443	-	GLG1	22	21	16	1	2	1	59	4	0.453333	YES
chr8	117864336	117864787	-	RAD21	15	16	9	2	2	0	40	4	0.453333	YES
chr15	42456685	42457193	-	VPS39	5	6	6	0	0	0	17	0	0.453333	YES
chr9	35738150	35738228	-	GBA2	11	9	5	0	0	1	25	1	0.45	YES
chr12	65134469	65136920	-	GNS	24	9	6	0	1	0	39	1	0.45	YES
chr17	2239025	2239330	-	TSR1	18	14	34	1	2	0	66	3	0.45	YES
chr6	170119015	170121100	-	PHF10	18	25	9	3	4	0	52	7	0.446667	YES
chr2	64144098	64147016	-	VPS54	16	25	14	2	4	2	55	8	0.446667	YES
chr20	17599325	17600277	-	RRBP1	13	5	7	0	0	0	25	0	0.446667	YES
chr7	102952579	102952653	+	PMPCB	62	67	7	0	2	0	136	2	0.443333	YES
chr9	95072958	95073427	-	NOL8	7	10	9	1	1	1	26	3	0.443333	YES
chr8	125339663	125342988	-	TMEM65	16	18	13	2	3	0	47	5	0.443333	YES
chr10	70204841	70206052	-	DNA2	20	17	5	3	3	0	42	6	0.443333	YES
chr12	70738009	70739959	+	CNOT2	16	10	15	2	2	3	41	7	0.443333	YES
chr12	6672679	6672777	-	NOP2	16	20	52	0	0	0	88	0	0.443333	YES
chr17	41907476	41908611	-	MPP3	23	18	31	4	2	0	72	6	0.44	YES
chr6	33656209	33656432	+	ITPR3	9	9	8	0	0	0	26	0	0.44	YES
chr17	18251755	18256985	-	SHMT1	17	22	12	2	3	2	51	7	0.44	YES
chr10	124754240	124755509	-	IKZF5	6	6	13	0	1	0	25	1	0.44	YES
chr20	42311527	42315491	+	MYBL2	33	16	37	2	3	0	86	5	0.44	YES
chr17	47122428	47123251	+	IGF2BP1	22	5	33	4	1	0	60	5	0.44	YES
chr15	52353698	52356098	+	MAPK6	5	6	6	0	1	0	17	1	0.436667	YES
chr1	111990199	111991240	-	WDR77	42	31	67	4	6	2	140	12	0.436667	YES
chr11	65109034	65111215	+	DPF2	15	5	26	3	0	0	46	3	0.436667	YES
chr14	20822407	20822967	+	PARP2	7	8	11	0	0	0	26	0	0.433333	YES
chr3	111805393	111812206	+	C3orf52	6	7	17	1	0	1	30	2	0.433333	YES
chr20	54972898	54974022	+	CSTF1	5	7	7	0	0	0	19	0	0.433333	YES
chr12	113602091	113603448	-	DDX54	8	6	14	1	1	0	28	2	0.433333	YES
chr17	61893034	61894227	+	DDX42	7	6	7	0	1	0	20	1	0.433333	YES
chr11	61069832	61070053	-	DDB1	5	5	10	0	1	0	20	1	0.433333	YES
chr2	114513122	114513946	-	SLC35F5	22	9	12	1	0	2	43	3	0.43	YES
chr16	29990830	29992981	+	TAOK2	22	26	22	1	2	3	70	6	0.43	YES
chr5	154300986	154304028	-	GEMIN5	5	9	8	1	1	1	22	3	0.43	YES
chr1	110553980	110554983	+	AHCYL1	77	43	27	6	5	4	147	15	0.43	YES
chr19	15466182	15469777	-	AKAP8	17	7	30	0	0	3	54	3	0.43	YES
chr17	40128789	40129278	-	DNAJC7	11	10	25	0	2	0	46	2	0.43	YES
chr9	133952722	133954535	+	LAMC3	5	10	21	1	1	0	36	2	0.426667	YES
chr7	150768385	150768476	+	SLC4A2	15	10	39	2	1	0	64	3	0.426667	YES
chr2	55906931	55907846	-	PNPT1	11	9	7	1	1	0	27	2	0.426667	YES
chr1	10218541	10221199	+	UBE4B	13	12	23	2	2	1	48	5	0.426667	YES
chr1	45218927	45219404	+	KIF2C	10	10	13	1	2	0	33	3	0.426667	YES
chr19	12834180	12834582	-	TNPO2	16	5	20	1	0	0	41	1	0.423333	YES
chr17	7125401	7125495	+	ACADVL	81	30	80	0	4	1	191	5	0.423333	YES
chr6	34839703	34840089	+	UHRF1BP1	15	10	9	0	1	1	34	2	0.423333	YES
chr2	242194574	242194788	-	HDLBP	11	9	10	0	0	0	30	0	0.423333	YES
chr1	154962734	154962814	+	FLAD1	8	9	12	0	0	0	29	0	0.423333	YES
chr11	16822623	16823214	-	PLEKHA7	8	12	7	0	2	0	27	2	0.423333	YES
chr9	35738630	35738748	-	GBA2	15	15	13	0	1	0	43	1	0.42	YES
chr9	33467867	33468027	-	NOL6	18	6	24	0	0	0	48	0	0.42	YES
chr18	21115665	21116636	-	NPC1	10	5	6	1	0	0	21	1	0.42	YES
chr4	13615286	13615819	-	BOD1L	10	9	15	0	0	0	34	0	0.42	YES
chr21	33975603	33976434	-	C21orf59	17	8	12	0	0	1	37	1	0.416667	YES
chr1	154557821	154558228	-	ADAR	56	37	31	4	6	0	124	10	0.416667	YES
chr5	179298531	179299891	-	TBC1D9B	72	41	78	2	3	0	191	5	0.413333	YES
chr3	50385333	50385554	-	NPRL2	7	5	14	0	1	0	26	1	0.413333	YES
chr2	74754491	74754597	-	AUP1	13	20	20	0	2	0	53	2	0.41	YES
chr9	137005934	137006631	+	WDR5	16	7	33	0	1	0	56	1	0.41	YES
chr12	72028606	72029222	-	ZFC3H1	17	6	12	0	0	0	35	0	0.41	YES
chr7	97820190	97820925	+	LMTK2	8	5	5	0	1	0	18	1	0.41	YES
chr10	127522516	127524672	+	BCCIP	17	8	17	3	0	0	42	3	0.406667	YES
chr22	36913479	36914809	-	EIF3D	26	26	22	1	0	3	74	4	0.403333	YES
chr17	18208535	18210204	-	TOP3A	27	10	27	1	0	1	64	2	0.403333	YES
chr6	149833439	149838489	-	PPIL4	29	27	42	4	5	8	98	17	0.4	YES
chr3	183519317	183521043	+	YEATS2	19	7	10	2	0	0	36	2	0.396667	YES
chr8	21996575	21996928	-	REEP4	9	6	10	1	0	0	25	1	0.396667	YES
chr3	50095996	50097081	+	RBM6	28	12	14	0	0	0	54	0	0.393333	YES
chr1	153905507	153905672	-	DENND4B	10	7	13	0	0	0	30	0	0.393333	YES
chr11	77066888	77069942	-	PAK1	43	28	17	3	3	3	88	9	0.393333	YES
chr2	9624680	9628275	+	IAH1	13	8	8	2	0	0	29	2	0.393333	YES
chr12	75900390	75900561	-	KRR1	11	6	10	0	0	0	27	0	0.393333	YES
chr2	153486239	153486338	+	FMNL2	7	8	5	0	1	0	20	1	0.39	YES
chr2	26998545	26999239	+	C2orf18	5	5	20	0	1	2	30	3	0.39	YES
chr19	12825984	12826056	-	TNPO2	44	28	48	1	0	0	120	1	0.39	YES
chr3	128976704	128979175	+	COPG	36	17	32	2	1	5	85	8	0.386667	YES
chr2	220432298	220432439	-	OBSL1	7	13	20	0	0	0	40	0	0.386667	YES
chr17	61901772	61901996	-	FTSJ3	6	10	12	0	0	0	28	0	0.386667	YES
chr1	26582357	26584087	+	CCDC21	9	6	10	0	0	1	25	1	0.386667	YES
chr17	7468905	7469033	+	SENP3	7	5	12	1	1	0	24	2	0.386667	YES
chr2	37439183	37439477	-	CEBPZ	7	5	8	0	0	0	20	0	0.386667	YES
chr1	53352726	53358453	+	ZYG11A	19	20	26	1	4	3	65	8	0.383333	YES
chr21	33974284	33974581	-	C21orf59	8	7	16	1	0	1	31	2	0.383333	YES
chr11	46703733	46709722	-	ARHGAP1	15	13	14	1	2	0	42	3	0.383333	YES
chr11	129748439	129751337	-	NFRKB	9	5	11	0	0	1	25	1	0.383333	YES
chr10	24889860	24890906	-	ARHGAP21	19	11	5	3	1	1	35	5	0.38	YES
chr5	7885968	7886727	+	MTRR	20	11	16	4	2	3	47	9	0.38	YES
chr5	38952528	38953086	-	RICTOR	14	10	6	0	2	0	30	2	0.38	YES
chr3	142136072	142137345	-	XRN1	20	21	15	3	2	1	56	6	0.376667	YES
chr2	219612951	219613558	+	TTLL4	6	15	13	0	0	0	34	0	0.376667	YES
chr11	71209575	71212347	+	NADSYN1	12	13	24	0	1	3	49	4	0.376667	YES
chrX	70357234	70357407	+	MED12	5	8	16	1	0	0	29	1	0.373333	YES
chr9	100388280	100389679	-	TSTD2	9	6	10	0	0	1	25	1	0.373333	YES
chr11	66983421	66985201	+	KDM2A	11	12	18	0	0	2	41	2	0.373333	YES
chr1	231396430	231398468	+	GNPAT	13	9	5	2	1	1	27	4	0.373333	YES
chr3	47890570	47890681	+	DHX30	5	8	7	0	1	0	20	1	0.373333	YES
chr3	141678683	141682653	-	TFDP2	18	10	6	3	2	0	34	5	0.373333	YES
chr20	34219948	34220084	-	CPNE1	19	16	37	0	0	0	72	0	0.37	YES
chr16	23692380	23693384	+	PLK1	8	11	23	0	1	0	42	1	0.37	YES
chr11	47813543	47814337	-	NUP160	24	11	10	4	0	0	45	4	0.37	YES
chr2	54122214	54122719	-	PSME4	19	10	16	1	1	1	45	3	0.37	YES
chr6	75800015	75801038	-	COL12A1	7	10	6	0	1	0	23	1	0.37	YES
chr14	105836238	105843104	+	PACS2	14	10	20	1	2	0	44	3	0.37	YES
chr5	112151291	112154662	+	APC	9	13	6	0	0	0	28	0	0.366667	YES
chrX	79948551	79951406	-	BRWD3	10	9	13	1	0	2	32	3	0.366667	YES
chr17	39983879	39985041	-	NT5C3L	16	8	8	0	1	0	32	1	0.366667	YES
chr3	52727063	52727202	+	GNL3	15	8	15	0	0	0	38	0	0.366667	YES
chr10	101656155	101657842	-	DNMBP	10	7	19	1	1	0	36	2	0.366667	YES
chr2	27607956	27608613	-	PPM1G	9	7	18	0	0	0	34	0	0.366667	YES
chr12	111158971	111159939	-	PPP1CC	14	13	11	1	2	0	38	3	0.366667	YES
chr9	138374662	138375795	+	KIAA0649	5	6	12	1	0	0	23	1	0.366667	YES
chr3	185390458	185393083	-	IGF2BP2	34	32	37	1	6	2	103	9	0.366667	YES
chr15	91448954	91449074	+	MAN2A2	5	5	5	0	0	0	15	0	0.366667	YES
chr17	80047049	80047125	-	FASN	5	5	7	0	0	0	17	0	0.366667	YES
chr2	234343131	234343414	+	DGKD	23	15	5	4	0	0	43	4	0.363333	YES
chr1	246720024	246720682	-	TFB2M	5	9	13	0	0	0	27	0	0.363333	YES
chr7	24705307	24705639	+	MPP6	15	13	5	0	2	0	33	2	0.363333	YES
chr17	4451945	4452626	-	MYBBP1A	8	5	31	1	0	0	44	1	0.363333	YES
chr8	1873571	1874542	+	ARHGEF10	8	5	5	0	0	0	18	0	0.363333	YES
chr3	50325703	50325839	-	IFRD2	27	14	45	0	1	0	86	1	0.363333	YES
chr5	37326070	37327730	-	NUP155	37	31	16	2	1	0	84	3	0.36	YES
chr17	80863930	80865636	+	TBCD	21	16	23	0	0	1	60	1	0.36	YES
chr3	50684257	50684553	+	MAPKAPK3	9	14	12	0	0	0	35	0	0.36	YES
chr16	2808549	2808985	+	SRRM2	19	36	38	3	4	3	93	10	0.36	YES
chr8	21997043	21997475	-	REEP4	12	7	9	2	0	0	28	2	0.36	YES
chr22	22039203	22040771	+	PPIL2	7	6	18	1	1	0	31	2	0.36	YES
chr18	12724619	12725437	+	PSMG2	6	5	6	0	1	0	17	1	0.36	YES
chr17	34859861	34861135	-	MYO19	45	44	53	3	7	1	142	11	0.356667	YES
chr1	153914833	153915031	-	DENND4B	22	15	25	3	3	0	62	6	0.353333	YES
chr3	124996654	124997967	-	ZNF148	9	15	7	1	0	0	31	1	0.35	YES
chr11	67048255	67048563	+	ADRBK1	35	12	19	1	1	0	66	2	0.35	YES
chr19	19166738	19168224	+	ARMC6	15	12	74	2	0	2	101	4	0.35	YES
chr2	160031696	160032862	+	TANC1	12	12	12	1	0	0	36	1	0.35	YES
chr3	148757944	148759276	-	HLTF	17	10	11	1	1	0	38	2	0.35	YES
chr11	10821896	10821978	-	EIF4G2	14	9	17	0	0	1	40	1	0.35	YES
chr11	64031268	64031492	+	PLCB3	10	8	8	1	1	0	26	2	0.35	YES
chr17	76969305	76970769	-	LGALS3BP	5	8	18	1	1	0	31	2	0.35	YES
chr5	176862123	176863073	+	GRK6	12	8	27	0	0	0	47	0	0.35	YES
chr1	44071115	44071199	+	PTPRF	8	7	27	0	0	1	42	1	0.35	YES
chr18	21044278	21044482	+	RIOK3	7	7	9	0	0	1	23	1	0.35	YES
chr18	33724998	33725910	+	ELP2	11	6	5	0	1	0	22	1	0.35	YES
chr3	167747091	167747567	-	GOLIM4	16	6	6	0	0	0	28	0	0.35	YES
chr7	150767999	150768158	+	SLC4A2	10	12	28	0	0	2	50	2	0.346667	YES
chr4	24541923	24542462	-	DHX15	22	24	29	2	4	1	75	7	0.346667	YES
chr17	4455588	4455745	-	MYBBP1A	8	8	7	0	0	0	23	0	0.346667	YES
chr17	17721689	17722326	-	SREBF1	61	29	60	3	4	2	150	9	0.346667	YES
chr12	6669493	6669612	-	NOP2	39	12	74	1	1	0	125	2	0.343333	YES
chr14	20823107	20823910	+	PARP2	12	9	6	2	1	0	27	3	0.343333	YES
chr1	120493461	120496165	-	NOTCH2	8	9	7	1	1	0	24	2	0.343333	YES
chr17	17722549	17722633	-	SREBF1	6	14	15	1	2	1	35	4	0.343333	YES
chr1	156707569	156707822	-	MRPL24	7	5	11	1	1	0	23	2	0.343333	YES
chr1	204082263	204083448	+	SOX13	13	8	8	2	1	0	29	3	0.34	YES
chr6	74475878	74476481	+	CD109	8	6	5	0	0	0	19	0	0.34	YES
chr11	57457676	57457806	+	ZDHHC5	8	5	6	0	0	1	19	1	0.34	YES
chr15	91490145	91491025	+	UNC45A	11	16	21	0	1	0	48	1	0.336667	YES
chr12	56998584	56998856	-	BAZ2A	20	16	32	1	0	0	68	1	0.336667	YES
chr2	37121177	37126665	-	STRN	18	14	8	3	1	1	40	5	0.336667	YES
chr11	47765716	47767607	-	FNBP4	5	8	10	1	1	1	23	3	0.336667	YES
chr20	34144043	34144743	+	ERGIC3	11	5	27	0	1	0	43	1	0.333333	YES
chr14	21458758	21460282	+	METT11D1	15	14	5	1	2	0	34	3	0.33	YES
chr2	219267129	219267757	+	CTDSP1	29	17	62	1	3	0	108	4	0.33	YES
chr14	102493882	102493955	+	DYNC1H1	23	14	11	0	0	0	48	0	0.326667	YES
chr16	11862952	11864638	-	ZC3H7A	23	17	13	2	2	0	53	4	0.326667	YES
chr20	60886841	60886975	-	LAMA5	22	8	37	3	0	0	67	3	0.326667	YES
chr6	33636934	33638101	+	ITPR3	8	10	22	0	2	0	40	2	0.326667	YES
chr4	24542572	24543495	-	DHX15	22	19	21	0	2	2	62	4	0.323333	YES
chr7	55459604	55466115	+	LANCL2	14	6	21	1	1	1	41	3	0.323333	YES
chr11	123471257	123474133	+	GRAMD1B	11	6	46	1	1	4	63	6	0.323333	YES
chr3	126734164	126735359	+	PLXNA1	28	5	55	1	0	2	88	3	0.323333	YES
chr6	136682318	136683587	-	MAP7	15	8	9	0	1	0	32	1	0.32	YES
chr9	131468159	131468991	+	PKN3	15	8	39	1	1	0	62	2	0.32	YES
chr17	45234491	45234595	-	CDC27	21	14	6	0	2	0	41	2	0.32	YES
chr6	136566008	136570174	-	FAM54A	5	7	11	0	1	0	23	1	0.32	YES
chr17	42940275	42941022	-	EFTUD2	8	13	12	0	2	0	33	2	0.32	YES
chr4	844873	845537	-	GAK	8	6	26	0	1	0	40	1	0.32	YES
chr8	38097883	38099767	+	DDHD2	10	5	7	0	1	0	22	1	0.32	YES
chr2	48035567	48036296	-	FBXO11	19	15	12	1	1	1	46	3	0.316667	YES
chr1	93584959	93586105	+	MTF2	31	22	21	5	2	0	74	7	0.316667	YES
chr18	19433180	19437090	+	MIB1	6	6	5	0	1	0	17	1	0.316667	YES
chr7	16721030	16722404	+	BZW2	21	15	11	3	3	1	47	7	0.316667	YES
chrX	153678084	153678230	+	FAM50A	30	19	33	0	2	0	82	2	0.316667	YES
chr11	65321375	65321521	-	LTBP3	7	9	21	0	0	0	37	0	0.316667	YES
chr15	91450144	91450538	+	MAN2A2	24	7	20	2	1	1	51	4	0.316667	YES
chr17	7465581	7466382	+	SENP3	16	7	59	3	1	2	82	6	0.316667	YES
chrX	69510001	69510287	+	KIF4A	5	5	9	0	0	1	19	1	0.316667	YES
chr3	13381799	13383247	-	NUP210	26	22	27	2	2	2	75	6	0.313333	YES
chr5	126154835	126156601	+	LMNB1	8	8	9	0	1	0	25	1	0.313333	YES
chr12	133242037	133244088	-	POLE	18	13	17	2	2	0	48	4	0.313333	YES
chr9	13192295	13193165	-	MPDZ	9	5	5	0	0	0	19	0	0.313333	YES
chr17	80040555	80040789	-	FASN	16	12	24	0	0	0	52	0	0.31	YES
chr15	101606947	101608875	+	LRRK1	7	11	19	1	2	0	37	3	0.31	YES
chr2	170489758	170492601	+	PPIG	6	5	8	1	1	0	19	2	0.31	YES
chr20	3176000	3180646	-	DDRGK1	5	5	7	0	0	0	17	0	0.31	YES
chr16	2224335	2225111	+	TRAF7	14	18	39	1	1	0	71	2	0.306667	YES
chr3	184019447	184019634	+	PSMD2	32	10	51	2	0	1	93	3	0.306667	YES
chr18	72180955	72183462	+	CNDP2	14	5	22	0	0	4	41	4	0.306667	YES
chr5	177638972	177639973	-	AGXT2L2	13	9	10	1	0	1	32	2	0.306667	YES
chr16	599472	599614	+	SOLH	7	5	28	0	0	0	40	0	0.306667	YES
chr16	722385	722488	+	RHOT2	29	17	57	1	0	0	103	1	0.306667	YES
chr16	58752205	58752430	-	GOT2	16	7	10	2	0	0	33	2	0.303333	YES
chr12	6969656	6970116	+	USP5	9	7	7	0	0	0	23	0	0.303333	YES
chr9	134016098	134019666	+	NUP214	123	72	54	8	13	5	249	26	0.303333	YES
chr3	49716383	49717025	+	APEH	12	10	12	0	2	1	34	3	0.303333	YES
chr9	131475922	131476324	+	PKN3	9	7	13	0	0	0	29	0	0.3	YES
chr2	170419861	170425693	-	FASTKD1	12	8	15	1	1	2	35	4	0.3	YES
chr19	50304316	50304646	+	AP2A1	5	8	13	0	0	0	26	0	0.3	YES
chr11	68179089	68181156	+	LRP5	7	6	30	0	0	0	43	0	0.3	YES
chr12	56554105	56555170	+	MYL6	57	56	84	6	11	3	197	20	0.3	YES
chr19	6452491	6453991	-	SLC25A23	11	10	9	1	0	0	30	1	0.296667	YES
chr5	154305635	154306944	-	GEMIN5	5	8	8	1	0	0	21	1	0.296667	YES
chr8	145107502	145107668	-	OPLAH	7	5	6	0	0	0	18	0	0.296667	YES
chr3	47552717	47555026	-	C3orf75	5	5	10	1	0	2	20	3	0.296667	YES
chr7	150751553	150752113	-	CDK5	12	8	22	1	1	1	42	3	0.296667	YES
chr13	51948933	51950183	-	INTS6	11	18	5	0	3	0	34	3	0.293333	YES
chr12	49884515	49888523	+	SPATS2	35	21	15	3	4	2	71	9	0.293333	YES
chr11	65824427	65824736	+	SF3B2	6	5	6	0	0	0	17	0	0.293333	YES
chr14	50300215	50301080	-	SDCCAG1	19	26	9	2	0	0	54	2	0.29	YES
chr16	2222601	2223182	+	TRAF7	18	11	29	2	1	0	58	3	0.29	YES
chr2	54891829	54893051	+	SPTBN1	24	9	10	0	1	0	43	1	0.29	YES
chr12	101723228	101727078	+	UTP20	6	8	16	0	0	0	30	0	0.29	YES
chrX	53227059	53227671	-	KDM5C	30	15	59	0	2	5	104	7	0.29	YES
chr16	2487324	2488070	+	CCNF	5	5	16	0	1	2	26	3	0.29	YES
chr12	121747667	121756079	-	ANAPC5	38	17	24	4	1	1	79	6	0.286667	YES
chr7	44609503	44609613	-	DDX56	6	22	20	0	4	0	48	4	0.286667	YES
chr15	91492951	91493383	+	UNC45A	12	5	11	1	0	1	28	2	0.286667	YES
chr1	78401730	78407707	+	NEXN	10	13	16	2	2	0	39	4	0.286667	YES
chr17	73049201	73055604	+	KCTD2	11	12	9	1	1	1	32	3	0.283333	YES
chr15	101586358	101588698	+	LRRK1	6	8	14	1	0	0	28	1	0.283333	YES
chr2	27455093	27455315	+	CAD	65	34	55	6	4	1	154	11	0.283333	YES
chrX	49029831	49030681	+	PLP2	21	25	31	3	2	0	77	5	0.28	YES
chr2	207655411	207656406	+	FASTKD2	17	10	11	0	1	0	38	1	0.28	YES
chrX	71840752	71842958	-	PHKA1	26	19	14	3	2	1	59	6	0.28	YES
chr5	58287832	58289198	-	PDE4D	39	34	21	2	6	1	94	9	0.28	YES
chr12	121765035	121766118	-	ANAPC5	42	43	29	1	8	4	114	13	0.28	YES
chr1	52260527	52263920	-	NRD1	27	35	32	2	7	2	94	11	0.28	YES
chr5	177571110	177573114	+	RMND5B	14	10	14	1	2	1	38	4	0.28	YES
chr2	27549761	27550043	-	GTF3C2	10	5	5	0	0	0	20	0	0.28	YES
chr12	51118670	51121485	+	DIP2B	8	10	13	0	0	1	31	1	0.276667	YES
chr19	5706004	5707070	-	LONP1	11	9	32	0	1	1	52	2	0.276667	YES
chr1	19584016	19584326	+	MRTO4	14	8	22	0	0	2	44	2	0.276667	YES
chr15	94911021	94913315	+	MCTP2	73	66	15	13	13	3	154	29	0.276667	YES
chr12	57038740	57038954	-	ATP5B	8	5	5	1	0	1	18	2	0.276667	YES
chr19	1120023	1122137	-	SBNO2	48	19	120	9	3	0	187	12	0.276667	YES
chr19	17531444	17533140	+	FAM125A	20	10	30	2	2	1	60	5	0.276667	YES
chr3	33434107	33434803	-	UBP1	33	10	15	0	2	2	58	4	0.273333	YES
chr11	62363810	62363929	-	MTA2	20	13	14	2	0	0	47	2	0.273333	YES
chr1	156914990	156915836	-	ARHGEF11	52	30	31	0	4	1	113	5	0.273333	YES
chr2	25062901	25064127	-	ADCY3	14	13	8	1	0	0	35	1	0.27	YES
chr4	184204060	184205378	+	WWC2	9	11	12	0	0	1	32	1	0.27	YES
chr19	48624580	48626190	-	LIG1	8	8	11	0	0	0	27	0	0.27	YES
chr17	42287842	42288159	-	UBTF	5	6	35	0	0	0	46	0	0.27	YES
chr2	86364264	86364591	+	PTCD3	8	10	9	0	2	0	27	2	0.27	YES
chr19	19768218	19770409	-	ATP13A1	29	20	26	1	0	2	75	3	0.266667	YES
chr3	136162247	136170874	-	STAG1	11	10	15	1	1	2	36	4	0.266667	YES
chr3	48637144	48637495	-	UQCRC1	13	15	13	0	3	2	41	5	0.266667	YES
chr17	27075197	27075279	+	TRAF4	9	5	9	0	1	0	23	1	0.266667	YES
chr11	72408695	72408955	-	ARAP1	18	12	17	0	0	0	47	0	0.266667	YES
chr16	23491209	23491965	-	GGA2	7	11	14	1	0	1	32	2	0.263333	YES
chr16	72130909	72131575	+	DHX38	24	21	21	1	1	2	66	4	0.263333	YES
chr5	179044934	179044989	-	HNRNPH1	35	55	24	4	4	3	114	11	0.263333	YES
chr17	7802862	7803213	+	CHD3	13	10	12	0	0	0	35	0	0.263333	YES
chr17	27816776	27818801	+	TAOK1	8	10	7	0	2	0	25	2	0.263333	YES
chr5	95088055	95091099	+	RHOBTB3	5	5	12	1	1	1	22	3	0.263333	YES
chr17	47021338	47022042	-	SNF8	19	5	12	1	0	0	36	1	0.263333	YES
chr4	140281783	140282877	+	NAA15	33	21	17	3	4	2	71	9	0.26	YES
chr12	123095448	123097658	+	KNTC1	5	5	7	1	1	1	17	3	0.26	YES
chr2	10924453	10925059	-	PDIA6	11	19	23	2	2	0	53	4	0.256667	YES
chr17	26965661	26966332	-	KIAA0100	22	18	15	1	3	0	55	4	0.256667	YES
chr19	33134259	33134336	-	ANKRD27	8	6	8	0	1	0	22	1	0.256667	YES
chr11	62362107	62362452	-	MTA2	12	11	13	0	2	0	36	2	0.256667	YES
chr17	39974780	39975461	+	FKBP10	34	24	47	5	4	1	105	10	0.253333	YES
chr16	28844676	28844759	+	ATXN2L	18	10	26	2	0	1	54	3	0.253333	YES
chr1	224473833	224475476	-	NVL	11	9	5	0	0	0	25	0	0.253333	YES
chr5	34807963	34808688	+	RAI14	12	7	11	2	0	0	30	2	0.253333	YES
chr14	64905891	64906843	+	MTHFD1	40	18	23	6	3	0	81	9	0.253333	YES
chr7	92935317	92938135	+	CCDC132	12	6	14	0	0	0	32	0	0.253333	YES
chr12	990166	990857	+	WNK1	17	17	15	2	3	2	49	7	0.253333	YES
chr1	65304273	65305285	-	JAK1	6	5	22	0	1	0	33	1	0.253333	YES
chr10	93756328	93757359	+	BTAF1	13	5	5	1	0	0	23	1	0.253333	YES
chr15	73052869	73064123	-	ADPGK	7	7	17	1	1	1	31	3	0.25	YES
chr1	22083196	22084155	-	USP48	9	17	6	0	3	0	32	3	0.25	YES
chr9	137694842	137696820	+	COL5A1	5	5	9	1	1	0	19	2	0.25	YES
chr7	129037166	129040130	+	AHCYL2	5	5	6	1	0	0	16	1	0.25	YES
chr6	25492253	25495338	+	LRRC16A	16	19	10	3	1	0	45	4	0.246667	YES
chr2	37449707	37450312	-	CEBPZ	13	11	23	2	0	3	47	5	0.246667	YES
chr7	99687370	99688021	+	COPS6	51	40	66	5	4	0	157	9	0.246667	YES
chr14	105179647	105179781	+	INF2	16	9	25	1	0	0	50	1	0.246667	YES
chr20	60714254	60714836	-	PSMA7	43	22	20	0	3	0	85	3	0.246667	YES
chr9	139350246	139350504	-	SEC16A	5	7	21	0	0	0	33	0	0.246667	YES
chrX	53578442	53579271	-	HUWE1	17	12	17	0	2	0	46	2	0.246667	YES
chr10	60556287	60558158	+	BICC1	12	6	10	0	0	0	28	0	0.246667	YES
chr8	48874241	48874612	+	MCM4	7	6	7	0	0	0	20	0	0.246667	YES
chr3	48445998	48447130	-	PLXNB1	5	6	8	1	0	0	19	1	0.246667	YES
chr2	100013362	100015210	+	EIF5B	10	5	14	0	1	1	29	2	0.246667	YES
chr8	144696624	144696793	-	TSTA3	19	17	50	0	2	0	86	2	0.246667	YES
chr16	2051193	2051583	-	ZNF598	15	15	52	0	0	0	82	0	0.243333	YES
chr14	35873005	35873623	-	NFKBIA	14	10	12	2	1	0	36	3	0.243333	YES
chr10	96322485	96322568	+	HELLS	10	14	6	0	2	0	30	2	0.243333	YES
chr14	58896152	58897365	+	KIAA0586	8	6	5	1	1	0	19	2	0.243333	YES
chr11	43351609	43352057	+	API5	5	10	9	0	2	0	24	2	0.243333	YES
chr12	120582253	120582442	-	GCN1L1	17	5	17	0	1	0	39	1	0.243333	YES
chr20	60886151	60886217	-	LAMA5	21	30	60	2	1	1	111	4	0.24	YES
chr16	57803868	57804438	-	KIFC3	13	10	15	0	0	0	38	0	0.24	YES
chr7	77268049	77268535	+	PTPN12	16	9	5	1	1	0	30	2	0.24	YES
chr15	59784589	59799411	+	FAM81A	12	9	9	0	1	0	30	1	0.24	YES
chr12	48359129	48359620	+	TMEM106C	24	11	8	1	1	1	43	3	0.236667	YES
chr2	27445205	27445386	+	CAD	10	9	14	0	1	0	33	1	0.236667	YES
chr17	27013808	27014105	+	SUPT6H	8	8	13	0	0	0	29	0	0.236667	YES
chr7	44797161	44797446	+	ZMIZ2	5	8	10	1	0	0	23	1	0.236667	YES
chr11	57578959	57581782	+	CTNND1	6	15	6	0	2	0	27	2	0.236667	YES
chr11	125439470	125442353	+	EI24	13	7	30	2	0	2	50	4	0.236667	YES
chr1	44071294	44071910	+	PTPRF	12	6	61	2	1	0	79	3	0.236667	YES
chr20	43254326	43255096	-	ADA	7	5	14	1	0	0	26	1	0.236667	YES
chr1	207262935	207263652	+	C4BPB	45	35	22	5	4	0	102	9	0.236667	YES
chr12	49416659	49418360	-	MLL2	31	23	59	4	4	2	113	10	0.236667	YES
chr7	133979832	133981142	-	SLC35B4	27	16	15	2	1	0	58	3	0.233333	YES
chr3	130452975	130454712	-	PIK3R4	10	12	15	1	0	1	37	2	0.233333	YES
chr3	48613869	48613954	-	COL7A1	6	9	9	1	0	0	24	1	0.233333	YES
chr3	122821342	122821597	+	PDIA5	20	7	6	2	1	0	33	3	0.233333	YES
chr3	9714443	9719000	+	MTMR14	9	7	8	1	1	1	24	3	0.233333	YES
chr12	58145126	58145282	-	CDK4	9	6	18	0	1	0	33	1	0.233333	YES
chr10	104849666	104850367	-	NT5C2	15	6	15	1	0	0	36	1	0.233333	YES
chr17	80007883	80008277	-	RFNG	73	50	73	0	6	0	196	6	0.233333	YES
chr12	102110591	102113900	+	CHPT1	12	20	20	1	1	0	52	2	0.23	YES
chr1	175957549	175958497	-	RFWD2	16	12	14	2	0	0	42	2	0.23	YES
chr13	113738382	113739205	+	MCF2L	21	11	20	0	0	0	52	0	0.23	YES
chr3	194146259	194147803	-	ATP13A3	7	9	27	0	1	0	43	1	0.23	YES
chr2	27609147	27609955	-	PPM1G	14	9	7	2	0	0	30	2	0.23	YES
chr9	131344172	131344757	+	SPTAN1	73	53	12	2	6	0	138	8	0.23	YES
chr11	67077811	67079061	+	SSH3	10	7	34	0	1	0	51	1	0.23	YES
chr12	50490756	50492496	+	SMARCD1	6	7	5	0	1	1	18	2	0.23	YES
chr11	89943763	89944382	-	CHORDC1	6	18	6	0	0	0	30	0	0.226667	YES
chr2	86350886	86352117	+	PTCD3	37	38	32	0	3	5	107	8	0.226667	YES
chr4	3138054	3142236	+	HTT	12	12	9	0	0	0	33	0	0.226667	YES
chr1	55562846	55563270	-	USP24	21	11	7	0	0	0	39	0	0.226667	YES
chr20	34262540	34262966	-	NFS1	12	7	10	0	1	0	29	1	0.226667	YES
chr5	176333049	176334114	-	UIMC1	9	18	13	0	3	1	40	4	0.226667	YES
chr1	172560212	172569203	+	C1orf9	7	6	9	0	1	1	22	2	0.226667	YES
chr2	178305765	178307134	+	AGPS	26	34	10	1	6	1	70	8	0.226667	YES
chr5	179227260	179227483	-	MGAT4B	17	10	20	0	2	0	47	2	0.226667	YES
chr9	139794125	139794873	+	TRAF2	9	5	6	0	0	0	20	0	0.226667	YES
chr9	139316429	139317546	+	PMPCA	17	6	42	1	1	0	65	2	0.223333	YES
chr12	133245526	133248800	-	POLE	5	10	8	1	0	0	23	1	0.223333	YES
chr15	91459487	91461423	+	MAN2A2	17	24	56	1	4	1	97	6	0.223333	YES
chr2	180810443	180815238	-	CWC22	5	6	11	0	1	0	22	1	0.223333	YES
chr9	20862712	20865924	+	KIAA1797	24	41	32	1	7	3	97	11	0.223333	YES
chr22	41605938	41609896	+	L3MBTL2	5	11	24	1	2	0	40	3	0.223333	YES
chr9	124530913	124532824	+	DAB2IP	10	11	18	0	1	1	39	2	0.22	YES
chr15	78585615	78587287	-	WDR61	9	10	15	0	1	0	34	1	0.22	YES
chr1	11142936	11147504	-	EXOSC10	40	14	10	0	2	0	64	2	0.22	YES
chr10	28345553	28347423	-	MPP7	6	7	12	1	0	1	25	2	0.22	YES
chr12	53677952	53679707	+	ESPL1	13	6	11	0	1	0	30	1	0.22	YES
chr3	100071347	100073615	+	NIT2	11	5	10	2	1	0	26	3	0.22	YES
chr12	46591601	46591701	-	SLC38A1	23	7	7	0	0	0	37	0	0.216667	YES
chr9	20715410	20717792	+	KIAA1797	22	20	14	1	3	0	56	4	0.216667	YES
chr3	186512567	186515323	-	RFC4	26	13	8	5	2	0	47	7	0.216667	YES
chr16	24971301	24975517	-	ARHGAP17	8	5	10	1	0	1	23	2	0.216667	YES
chr9	127683520	127684001	-	GOLGA1	12	20	11	0	1	0	43	1	0.213333	YES
chr2	9484765	9484859	+	ASAP2	10	15	6	2	0	0	31	2	0.213333	YES
chr14	55429270	55429455	-	WDHD1	12	8	7	0	0	0	27	0	0.213333	YES
chr19	282810	287473	-	PPAP2C	7	6	5	0	0	0	18	0	0.213333	YES
chr7	99950291	99950383	+	PILRB	33	28	47	4	4	1	108	9	0.213333	YES
chr3	160129873	160130113	+	SMC4	23	13	10	0	0	1	46	1	0.21	YES
chr3	183681377	183682972	-	ABCC5	7	13	17	0	0	0	37	0	0.21	YES
chr3	10128949	10130132	+	FANCD2	5	11	6	0	1	0	22	1	0.21	YES
chr9	35062136	35062213	-	VCP	7	9	10	0	0	0	26	0	0.21	YES
chr7	135282167	135282745	+	NUP205	58	58	21	5	7	3	137	15	0.21	YES
chr7	129821560	129824023	-	TMEM209	12	14	14	1	2	1	40	4	0.21	YES
chr3	25672431	25673936	-	TOP2B	36	44	14	5	4	0	94	9	0.206667	YES
chr19	16318961	16319840	+	AP1M1	32	17	29	0	2	0	78	2	0.206667	YES
chr20	33050027	33057852	+	ITCH	45	22	11	2	4	0	78	6	0.206667	YES
chr4	184626224	184627959	+	C4orf41	12	15	5	0	3	1	32	4	0.206667	YES
chr14	50912840	50914131	-	MAP4K5	9	5	6	0	1	1	20	2	0.206667	YES
chr17	27183601	27184956	+	ERAL1	5	13	7	0	0	0	25	0	0.203333	YES
chrX	153052609	153052918	-	IDH3G	20	5	10	0	0	0	35	0	0.203333	YES
chr11	70184560	70185276	+	PPFIA1	11	13	14	0	1	0	38	1	0.203333	YES
chr7	100851006	100852133	-	PLOD3	14	12	37	1	1	3	63	5	0.203333	YES
chr9	132839658	132841908	+	GPR107	13	10	8	2	1	1	31	4	0.203333	YES
chr2	171693394	171699078	+	GAD1	30	25	25	4	4	3	80	11	0.203333	YES
chr7	120480164	120496751	-	TSPAN12	13	6	19	2	1	0	38	3	0.203333	YES
chr19	15508667	15510112	-	AKAP8L	25	20	95	4	4	1	140	9	0.203333	YES
chr12	56816777	56817057	-	TIMELESS	14	21	18	0	0	0	53	0	0.2	YES
chr5	179226311	179226505	-	MGAT4B	22	25	48	3	2	0	95	5	0.2	YES
chrX	16870246	16870673	-	RBBP7	6	15	14	0	2	0	35	2	0.2	YES
chr12	56668916	56669779	-	CS	12	6	16	1	0	1	34	2	0.2	YES
chr11	46797934	46798988	-	CKAP5	16	29	8	1	2	0	53	3	0.196667	YES
chr12	133250294	133251983	-	POLE	25	20	49	2	2	4	94	8	0.196667	YES
chr11	107197780	107200643	-	CWF19L2	19	18	12	3	2	0	49	5	0.196667	YES
chr1	22174587	22175135	-	HSPG2	15	8	13	0	0	0	36	0	0.196667	YES
chr6	13616005	13616694	+	NOL7	6	6	9	0	1	0	21	1	0.196667	YES
chr9	139686811	139687270	+	TMEM141	5	6	12	0	1	0	23	1	0.196667	YES
chr17	79477860	79477952	-	ACTG1	6	6	37	1	0	0	49	1	0.196667	YES
chr5	176923525	176924528	-	PDLIM7	8	5	20	0	1	1	33	2	0.196667	YES
chr1	160194910	160195380	-	DCAF8	15	5	7	0	0	0	27	0	0.193333	YES
chr21	33746082	33747706	-	URB1	5	12	6	1	0	0	23	1	0.193333	YES
chr7	129091589	129093067	+	FAM40B	14	8	9	0	0	1	31	1	0.193333	YES
chr1	186325582	186326528	-	TPR	67	61	92	5	8	7	220	20	0.193333	YES
chr16	89952375	89954059	+	TCF25	6	7	19	1	1	0	32	2	0.193333	YES
chr1	52256322	52256571	-	NRD1	8	7	7	0	0	0	22	0	0.193333	YES
chr10	112343721	112343940	+	SMC3	13	25	6	0	0	0	44	0	0.19	YES
chr1	163298698	163306540	+	NUF2	18	14	10	2	0	0	42	2	0.19	YES
chr9	139358193	139358871	-	SEC16A	27	8	10	0	1	0	45	1	0.19	YES
chr10	115889731	115890905	-	C10orf118	17	6	8	0	0	0	31	0	0.19	YES
chr14	64675664	64676145	+	SYNE2	30	20	8	2	1	1	58	4	0.186667	YES
chr16	28124372	28128638	-	XPO6	50	33	54	7	4	7	137	18	0.186667	YES
chr22	43267476	43272142	-	PACSIN2	9	6	21	0	1	3	36	4	0.186667	YES
chr7	1515708	1515864	-	INTS1	6	6	28	0	1	0	40	1	0.186667	YES
chr17	36962649	36963017	-	CWC25	14	6	19	0	0	0	39	0	0.186667	YES
chr12	123353110	123355436	-	VPS37B	11	6	14	2	0	2	31	4	0.186667	YES
chr3	158364737	158366829	+	GFM1	9	6	13	0	0	1	28	1	0.186667	YES
chr7	105146504	105146635	-	PUS7	10	11	10	0	2	0	31	2	0.186667	YES
chr19	10790604	10791021	+	ILF3	12	13	29	0	1	3	54	4	0.183333	YES
chr2	135180491	135185935	+	MGAT5	12	13	6	0	1	1	31	2	0.183333	YES
chr17	2601885	2603675	-	KIAA0664	12	11	43	1	1	1	66	3	0.183333	YES
chr12	72026798	72027043	-	ZFC3H1	20	18	8	0	2	0	46	2	0.183333	YES
chr2	128939865	128941248	+	UGGT1	11	6	7	2	1	1	24	4	0.183333	YES
chr17	80526078	80529599	+	FOXK2	17	5	13	1	1	1	35	3	0.183333	YES
chr16	74496529	74497253	-	GLG1	7	5	7	1	0	0	19	1	0.183333	YES
chr3	49064320	49064392	-	IMPDH2	13	24	20	0	2	0	57	2	0.18	YES
chrX	24721465	24722505	+	POLA1	42	45	19	0	5	2	106	7	0.18	YES
chr4	154276864	154279625	+	MND1	11	6	6	1	0	0	23	1	0.18	YES
chrX	53579403	53579598	-	HUWE1	7	6	12	0	0	1	25	1	0.18	YES
chr12	108918284	108919233	-	SART3	6	6	9	0	0	1	21	1	0.18	YES
chr1	120491750	120493346	-	NOTCH2	18	21	10	3	4	0	49	7	0.18	YES
chr17	18136117	18137091	+	LLGL1	18	17	14	2	0	0	49	2	0.176667	YES
chr17	4448471	4448553	-	MYBBP1A	22	13	45	0	0	0	80	0	0.176667	YES
chr3	160952644	160952909	+	NMD3	19	12	6	0	0	0	37	0	0.176667	YES
chr3	124461114	124462761	+	UMPS	5	7	7	0	1	1	19	2	0.176667	YES
chr11	8938915	8940883	+	C11orf17	12	7	9	2	0	0	28	2	0.176667	YES
chr1	55609877	55611670	-	USP24	14	6	8	0	0	0	28	0	0.176667	YES
chr6	33657976	33658693	+	ITPR3	46	20	57	5	4	1	123	10	0.176667	YES
chr1	150550968	150551318	-	MCL1	23	7	130	2	1	3	160	6	0.176667	YES
chr1	161132181	161132404	+	USP21	36	10	9	0	2	0	55	2	0.173333	YES
chr4	79516592	79516947	+	ANXA3	61	45	15	0	5	0	121	5	0.173333	YES
chr17	38572321	38572673	-	TOP2A	10	8	6	2	1	0	24	3	0.173333	YES
chr10	104242861	104243916	-	ACTR1A	16	7	11	0	1	1	34	2	0.173333	YES
chr7	128034654	128034942	-	IMPDH1	24	20	51	2	3	0	95	5	0.173333	YES
chr3	48630372	48630534	-	COL7A1	13	11	13	0	2	0	37	2	0.173333	YES
chr21	46360102	46363598	+	C21orf70	11	15	39	2	3	2	65	7	0.173333	YES
chr2	233709285	233710441	+	GIGYF2	12	5	23	0	0	0	40	0	0.173333	YES
chr1	151373065	151373239	+	PSMB4	45	34	16	2	2	0	95	4	0.17	YES
chr10	129911867	129914754	-	MKI67	131	104	132	13	13	6	367	32	0.17	YES
chr15	90773738	90774165	-	CIB1	11	6	6	2	1	0	23	3	0.17	YES
chr21	45732178	45732860	+	PFKL	7	6	10	1	1	0	23	2	0.17	YES
chr13	46554140	46559431	-	ZC3H13	13	5	14	0	1	0	32	1	0.17	YES
chr17	5276750	5280410	+	RABEP1	6	5	8	1	1	0	19	2	0.17	YES
chr20	21327189	21328783	+	XRN2	10	5	5	1	0	1	20	2	0.17	YES
chr17	48560849	48561066	+	RSAD1	14	10	11	1	1	0	35	2	0.166667	YES
chr8	23156461	23159539	-	LOXL2	15	16	47	3	1	0	78	4	0.166667	YES
chr7	150913116	150915166	-	ABCF2	13	11	12	1	0	2	36	3	0.166667	YES
chr1	6713012	6713970	-	DNAJC11	33	19	52	1	2	0	104	3	0.166667	YES
chr17	40139929	40140749	-	DNAJC7	14	17	25	0	2	2	56	4	0.166667	YES
chrX	48435498	48435852	+	RBM3	27	23	40	2	3	1	90	6	0.166667	YES
chr5	179991594	179991674	+	CNOT6	8	7	6	1	0	0	21	1	0.166667	YES
chr1	38283155	38287792	-	MTF1	7	6	21	0	0	0	34	0	0.166667	YES
chr17	40460352	40461064	+	STAT5A	5	5	7	0	1	0	17	1	0.166667	YES
chr20	60902726	60902921	-	LAMA5	14	15	21	1	2	0	50	3	0.163333	YES
chr11	3794970	3797111	-	NUP98	11	6	7	0	1	1	24	2	0.163333	YES
chr12	121768476	121769149	-	ANAPC5	26	23	7	2	4	0	56	6	0.163333	YES
chr5	167933205	167933726	+	RARS	19	10	12	1	2	0	41	3	0.163333	YES
chr22	41734360	41735004	+	ZC3H7B	10	5	18	0	1	0	33	1	0.163333	YES
chr2	170425763	170428162	-	FASTKD1	12	12	14	0	0	2	38	2	0.16	YES
chr19	17273277	17273797	+	MYO9B	7	11	7	0	0	0	25	0	0.16	YES
chr16	68380184	68381113	+	PRMT7	14	13	15	0	2	0	42	2	0.16	YES
chr1	180959246	180962498	-	STX6	11	5	15	0	1	0	31	1	0.16	YES
chr7	148486919	148487401	+	CUL1	11	5	11	1	0	1	27	2	0.16	YES
chrX	47428433	47428937	+	ARAF	38	18	39	0	2	3	95	5	0.156667	YES
chr17	39976714	39977198	+	FKBP10	36	27	153	7	5	4	216	16	0.156667	YES
chr1	150049858	150053423	+	VPS45	20	10	12	3	2	1	42	6	0.156667	YES
chr12	49719942	49720450	+	TROAP	5	6	8	0	0	0	19	0	0.156667	YES
chr12	7077759	7078660	-	PHB2	32	22	44	3	1	2	98	6	0.153333	YES
chr17	26969354	26969886	-	KIAA0100	10	16	8	0	0	0	34	0	0.153333	YES
chr1	173795925	173797470	+	DARS2	20	13	5	4	1	0	38	5	0.153333	YES
chr5	5447874	5447953	+	KIAA0947	10	12	7	0	0	0	29	0	0.153333	YES
chr1	160263254	160264273	-	COPA	15	10	17	2	1	2	42	5	0.153333	YES
chrX	41205876	41206111	+	DDX3X	5	8	8	0	0	0	21	0	0.153333	YES
chr1	113232721	113234286	+	MOV10	14	6	13	2	0	1	33	3	0.153333	YES
chr13	98654846	98654937	+	IPO5	5	6	6	0	0	1	17	1	0.153333	YES
chr4	83348718	83349170	-	HNRPDL	11	11	13	2	2	2	35	6	0.153333	YES
chr22	44369204	44371934	+	SAMM50	18	21	36	0	1	2	75	3	0.15	YES
chr15	65448195	65449181	-	CLPX	14	16	7	0	1	1	37	2	0.15	YES
chr12	12976951	12977473	+	DDX47	7	11	7	1	1	0	25	2	0.15	YES
chr6	74528259	74530184	+	CD109	5	10	5	0	0	0	20	0	0.15	YES
chr8	144896289	144897383	-	SCRIB	7	8	52	1	1	0	67	2	0.15	YES
chrX	39913296	39913508	-	BCOR	20	20	6	4	1	0	46	5	0.146667	YES
chr20	60890004	60890083	-	LAMA5	17	8	29	0	0	0	54	0	0.146667	YES
chr1	153735839	153736307	+	INTS3	10	14	8	1	2	0	32	3	0.146667	YES
chr19	54653494	54655962	+	CNOT3	10	6	26	1	1	0	42	2	0.146667	YES
chr20	30904678	30914573	+	KIF3B	7	5	7	1	1	0	19	2	0.146667	YES
chrX	153580816	153580920	-	FLNA	16	5	33	3	0	0	54	3	0.146667	YES
chrX	153596107	153596209	-	FLNA	9	5	17	0	0	0	31	0	0.146667	YES
chr19	1428995	1429965	+	DAZAP1	18	13	39	2	1	4	70	7	0.143333	YES
chr1	204429070	204429451	-	PIK3C2B	18	11	7	0	1	0	36	1	0.143333	YES
chr12	6618959	6619240	+	NCAPD2	12	11	5	0	1	0	28	1	0.143333	YES
chr5	154278871	154280898	-	GEMIN5	5	7	5	1	0	0	17	1	0.143333	YES
chr10	121609089	121612561	-	C10orf119	18	12	10	1	2	0	40	3	0.143333	YES
chr17	26943216	26943396	-	KIAA0100	30	6	12	0	0	0	48	0	0.143333	YES
chr2	17947957	17950004	+	GEN1	22	20	14	2	4	0	56	6	0.143333	YES
chr4	76711951	76714842	+	USO1	9	20	6	0	1	1	35	2	0.14	YES
chr15	91017366	91017716	+	IQGAP1	46	27	11	4	3	0	84	7	0.14	YES
chr6	43514490	43515344	-	XPO5	8	8	7	1	0	0	23	1	0.14	YES
chr9	116035719	116037661	-	CDC26	6	6	20	0	1	2	32	3	0.14	YES
chr6	135751139	135752345	-	AHI1	9	17	5	0	3	0	31	3	0.14	YES
chr16	84792414	84792968	+	USP10	11	5	7	0	1	0	23	1	0.14	YES
chr2	15768642	15768761	+	DDX1	10	5	5	0	0	0	20	0	0.14	YES
chrX	41204578	41204656	+	DDX3X	8	15	10	0	0	1	33	1	0.136667	YES
chr22	36715681	36716264	-	MYH9	31	12	25	1	1	0	68	2	0.136667	YES
chr17	65714205	65715789	+	NOL11	10	10	19	0	0	0	39	0	0.136667	YES
chr1	204433261	204433577	-	PIK3C2B	15	9	6	0	1	0	30	1	0.136667	YES
chr2	109388328	109388944	+	RANBP2	10	5	11	0	1	0	26	1	0.136667	YES
chr7	2406084	2406159	+	EIF3B	30	23	22	2	0	0	75	2	0.133333	YES
chr7	150761455	150761612	+	SLC4A2	23	29	63	2	2	0	115	4	0.133333	YES
chr10	81925954	81926645	-	ANXA11	30	14	24	5	0	0	68	5	0.133333	YES
chr1	156761585	156764456	+	PRCC	29	11	14	2	1	1	54	4	0.133333	YES
chr2	109393688	109397724	+	RANBP2	25	10	20	3	1	1	55	5	0.133333	YES
chr11	67207911	67208595	-	CORO1B	19	10	12	2	1	0	41	3	0.133333	YES
chr6	90459471	90460072	-	MDN1	14	10	7	2	1	1	31	4	0.133333	YES
chr22	18562781	18566202	+	PEX26	13	10	7	0	1	0	30	1	0.133333	YES
chr16	1503896	1504411	-	CLCN7	7	9	8	0	0	0	24	0	0.133333	YES
chr2	96958834	96959053	-	SNRNP200	12	8	8	0	0	0	28	0	0.133333	YES
chr2	182778661	182779942	+	SSFA2	13	7	17	0	1	0	37	1	0.133333	YES
chr14	21882578	21883096	-	CHD8	19	13	5	0	2	1	37	3	0.133333	YES
chr20	61541373	61542125	-	DIDO1	6	6	24	1	1	0	36	2	0.133333	YES
chr12	56815278	56815510	-	TIMELESS	23	11	5	2	2	0	39	4	0.133333	YES
chr1	114964259	114967212	-	TRIM33	25	10	16	3	2	1	51	6	0.133333	YES
chr17	40267054	40267740	-	KAT2A	52	33	110	5	2	0	195	7	0.13	YES
chr11	35747712	35756973	+	TRIM44	6	11	11	1	1	0	28	2	0.13	YES
chr3	4706981	4709060	+	ITPR1	34	28	6	6	4	0	68	10	0.13	YES
chr17	15961379	15961784	-	NCOR1	9	7	5	0	0	0	21	0	0.13	YES
chr11	20398264	20403723	+	HTATIP2	10	6	13	1	0	0	29	1	0.13	YES
chr10	104158281	104158495	+	NFKB2	29	17	34	1	3	2	80	6	0.13	YES
chr7	134135655	134136337	-	AKR1B1	27	16	51	0	3	1	94	4	0.13	YES
chr17	4453649	4455174	-	MYBBP1A	13	5	48	2	0	0	66	2	0.13	YES
chr13	28004759	28006867	+	GTF3A	9	5	8	1	0	0	22	1	0.13	YES
chr7	148506248	148506401	-	EZH2	6	5	5	0	0	0	16	0	0.13	YES
chr4	13579256	13581551	-	BOD1L	16	14	7	1	1	0	37	2	0.13	YES
chr18	691107	691203	-	ENOSF1	9	5	11	0	0	0	25	0	0.13	YES
chr16	70590238	70590788	+	SF3B3	31	20	13	2	1	0	64	3	0.126667	YES
chr3	9488992	9489369	+	SETD5	17	12	10	0	1	0	39	1	0.126667	YES
chr7	73106977	73107658	+	WBSCR22	15	23	37	0	2	2	75	4	0.126667	YES
chr11	63971095	63971525	+	STIP1	18	8	46	3	0	0	72	3	0.126667	YES
chr1	186359984	186360827	+	C1orf27	5	7	6	1	1	0	18	2	0.126667	YES
chr2	106717575	106721249	-	UXS1	5	7	6	1	0	1	18	2	0.126667	YES
chr7	92938255	92940477	+	CCDC132	5	10	10	0	2	0	25	2	0.126667	YES
chr15	59180755	59181628	-	SLTM	12	5	8	1	1	1	25	3	0.126667	YES
chr4	185618958	185621973	-	MLF1IP	26	29	11	1	5	2	66	8	0.126667	YES
chr1	245019461	245019758	-	HNRNPU	39	33	22	5	2	0	94	7	0.123333	YES
chr5	140954714	140955796	-	DIAPH1	23	19	19	0	2	2	61	4	0.123333	YES
chr2	233681743	233684536	+	GIGYF2	13	9	22	1	1	3	44	5	0.123333	YES
chr3	47043779	47043860	+	NBEAL2	12	7	21	0	0	0	40	0	0.123333	YES
chr22	31324195	31328345	-	MORC2	17	20	29	2	4	0	66	6	0.123333	YES
chr22	18222255	18226568	-	BID	7	5	14	1	0	0	26	1	0.123333	YES
chr3	51992366	51992805	-	PCBP4	7	5	9	0	0	0	21	0	0.123333	YES
chr1	55600087	55603187	-	USP24	6	5	7	0	0	0	18	0	0.123333	YES
chr16	68266192	68266273	-	ESRP2	8	5	8	0	0	0	21	0	0.12	YES
chr2	42510113	42511773	+	EML4	28	11	5	2	1	1	44	4	0.12	YES
chr2	128878873	128880759	+	UGGT1	10	9	5	0	1	0	24	1	0.12	YES
chr16	31201720	31202062	+	FUS	8	9	14	0	1	1	31	2	0.12	YES
chr19	19165131	19166073	+	ARMC6	7	9	27	0	0	1	43	1	0.12	YES
chr5	33459967	33461006	+	TARS	85	51	23	1	8	4	159	13	0.12	YES
chr20	34317288	34317383	-	RBM39	48	30	20	4	0	0	98	4	0.116667	YES
chr1	204400922	204401327	-	PIK3C2B	15	10	10	2	0	0	35	2	0.116667	YES
chr15	91483704	91485666	+	UNC45A	9	10	23	1	0	2	42	3	0.116667	YES
chr4	83748786	83750152	-	SEC31A	20	9	8	4	1	0	37	5	0.116667	YES
chr10	7841158	7841734	+	ATP5C1	57	39	17	1	5	0	113	6	0.116667	YES
chr2	240958057	240960613	-	NDUFA10	6	7	22	1	1	0	35	2	0.116667	YES
chr19	3546424	3547269	-	C19orf28	96	46	47	4	7	0	189	11	0.116667	YES
chr1	32794762	32796178	+	HDAC1	14	12	21	0	2	0	47	2	0.113333	YES
chrX	153595219	153595764	-	FLNA	36	25	81	1	0	1	142	2	0.113333	YES
chr2	203759350	203760787	-	WDR12	19	18	19	1	0	1	56	2	0.113333	YES
chr20	2641237	2641342	-	IDH3B	7	18	16	0	0	1	41	1	0.113333	YES
chr3	142747489	142751625	+	SR140	29	11	7	1	1	0	47	2	0.113333	YES
chr6	125621806	125622994	-	HDDC2	6	7	5	0	1	1	18	2	0.113333	YES
chr14	102482827	102483102	+	DYNC1H1	28	6	10	2	0	0	44	2	0.113333	YES
chrX	47060400	47060674	+	UBA1	16	6	14	0	0	0	36	0	0.113333	YES
chr1	109893625	109896988	-	SORT1	29	22	12	5	4	2	63	11	0.113333	YES
chr14	102471574	102472224	+	DYNC1H1	24	11	14	0	2	0	49	2	0.113333	YES
chr9	116049109	116050454	+	PRPF4	12	5	5	1	1	1	22	3	0.113333	YES
chr7	44736157	44736512	+	OGDH	12	5	8	1	0	0	25	1	0.113333	YES
chr11	118883973	118885703	+	CCDC84	12	14	5	1	0	0	31	1	0.11	YES
chr10	126662968	126670277	+	ZRANB1	19	12	13	3	1	2	44	6	0.11	YES
chr13	99042375	99043065	+	FARP1	9	9	8	1	0	0	26	1	0.11	YES
chr9	139360915	139361408	-	SEC16A	28	16	34	1	2	0	78	3	0.11	YES
chr7	2415163	2416584	+	EIF3B	75	79	126	12	11	7	280	30	0.11	YES
chrX	153588956	153589675	-	FLNA	24	13	20	2	2	0	57	4	0.11	YES
chr10	120810834	120816251	-	EIF3A	15	12	14	3	2	1	41	6	0.11	YES
chr13	111932698	111932884	+	ARHGEF7	11	10	8	0	2	0	29	2	0.11	YES
chr19	10291246	10291453	-	DNMT1	6	5	8	0	1	0	19	1	0.11	YES
chr2	36668644	36669757	+	CRIM1	5	5	20	0	1	0	30	1	0.11	YES
chr17	39919574	39920964	-	JUP	17	5	13	1	0	0	35	1	0.11	YES
chr2	113418150	113418718	+	SLC20A1	5	5	10	0	0	0	20	0	0.11	YES
chr1	116932330	116932834	+	ATP1A1	24	17	15	0	0	2	56	2	0.106667	YES
chr6	82922511	82923943	-	IBTK	5	9	7	1	0	0	21	1	0.106667	YES
chr7	92141018	92143161	-	PEX1	5	8	5	0	0	0	18	0	0.106667	YES
chr2	3197938	3200651	-	TSSC1	10	6	15	2	1	0	31	3	0.106667	YES
chr7	107576102	107577537	-	LAMB1	11	5	8	2	0	0	24	2	0.106667	YES
chr3	52964447	52964956	-	SFMBT1	20	21	6	1	0	0	47	1	0.103333	YES
chr2	242194996	242195598	-	HDLBP	17	16	25	3	1	0	58	4	0.103333	YES
chr11	124519693	124524550	-	SIAE	13	14	17	0	1	0	44	1	0.103333	YES
chr8	98718979	98725889	+	MTDH	7	13	12	1	1	1	32	3	0.103333	YES
chr17	48156291	48156439	+	ITGA3	28	19	10	1	2	0	57	3	0.103333	YES
chrX	153060210	153061888	+	SSR4	32	9	76	6	1	2	117	9	0.103333	YES
chr16	4029277	4033232	-	ADCY9	16	9	64	1	1	3	89	5	0.103333	YES
chr5	14397264	14398988	+	TRIO	13	9	42	2	1	4	64	7	0.103333	YES
chr11	14529313	14532417	-	PSMA1	7	9	8	0	0	0	24	0	0.103333	YES
chr11	77817993	77820487	-	ALG8	17	14	29	0	2	3	60	5	0.103333	YES
chr14	102467402	102467481	+	DYNC1H1	10	7	7	1	1	0	24	2	0.103333	YES
chrX	153586937	153587351	-	FLNA	50	30	88	7	5	3	168	15	0.103333	YES
chr16	46652285	46655168	-	SHCBP1	7	6	6	0	1	0	19	1	0.103333	YES
chr6	33657188	33657810	+	ITPR3	7	5	23	0	0	1	35	1	0.103333	YES
chr17	1562843	1563134	-	PRPF8	24	18	8	2	0	0	50	2	0.1	YES
chr7	156626487	156629506	-	LMBR1	15	17	17	2	1	2	49	5	0.1	YES
chr1	214811345	214813263	+	CENPF	12	7	15	0	1	0	34	1	0.1	YES
chr7	102045131	102047880	+	PRKRIP1	8	7	15	0	0	2	30	2	0.1	YES
chr19	15365074	15366107	-	BRD4	9	6	23	0	1	0	38	1	0.1	YES
chr17	40140915	40141421	-	DNAJC7	5	6	7	0	0	0	18	0	0.1	YES
chr8	87440047	87442925	+	WWP1	32	25	14	5	5	0	71	10	0.1	YES
chr19	8531273	8532418	+	HNRNPM	20	15	15	2	3	3	50	8	0.1	YES
chr1	197104373	197108896	-	ASPM	15	28	27	1	1	2	70	4	0.1	YES
chrX	153762712	153763382	-	G6PD	17	15	15	2	1	2	47	5	0.1	YES
chrX	55027013	55027978	+	APEX2	14	14	14	0	1	1	42	2	0.1	YES
chr4	113186224	113186889	+	AP1AR	9	12	5	0	2	0	26	2	0.0966667	YES
chr2	216199728	216200757	+	ATIC	18	19	8	3	1	0	45	4	0.0966667	YES
chr2	44152297	44153031	-	LRPPRC	12	12	14	0	0	1	38	1	0.0966667	YES
chr5	112874879	112876664	+	YTHDC2	9	11	5	0	0	0	25	0	0.0966667	YES
chr17	8159726	8159841	+	PFAS	12	7	8	0	1	0	27	1	0.0966667	YES
chr1	44083583	44084300	+	PTPRF	23	6	51	1	1	3	80	5	0.0966667	YES
chr12	75895781	75897683	-	KRR1	10	6	18	1	1	1	34	3	0.0966667	YES
chr11	65825877	65826300	+	SF3B2	18	20	12	0	2	2	50	4	0.0933333	YES
chr20	30738679	30742905	+	TM9SF4	28	34	58	3	6	3	120	12	0.0933333	YES
chr1	183495903	183497090	+	SMG7	10	14	6	0	0	1	30	1	0.0933333	YES
chr1	32690077	32691771	+	EIF3I	6	14	7	0	0	1	27	1	0.0933333	YES
chr3	128629657	128631349	+	ACAD9	13	7	14	0	0	1	34	1	0.0933333	YES
chr1	153636951	153637695	-	ILF2	21	18	16	3	0	1	55	4	0.0933333	YES
chr20	61574536	61574846	+	C20orf11	11	8	7	0	0	0	26	0	0.0933333	YES
chr19	47585553	47587601	-	ZC3H4	10	7	7	2	1	0	24	3	0.0933333	YES
chr1	236736129	236737501	-	HEATR1	11	6	17	0	0	3	34	3	0.0933333	YES
chr10	871257	871703	-	LARP4B	10	10	11	0	2	0	31	2	0.0933333	YES
chr9	100424427	100425235	+	NCBP1	21	14	14	1	1	2	49	4	0.09	YES
chr12	48358207	48359064	+	TMEM106C	8	9	7	0	1	0	24	1	0.09	YES
chr15	89848930	89849237	+	FANCI	28	14	7	1	2	0	49	3	0.09	YES
chr19	13039272	13039348	-	FARSA	5	15	15	0	1	0	35	1	0.09	YES
chr3	193382786	193384084	+	OPA1	5	12	7	1	0	0	24	1	0.09	YES
chr6	33654297	33654785	+	ITPR3	17	9	32	2	1	1	58	4	0.09	YES
chr3	142735214	142735683	+	SR140	13	12	19	1	2	2	44	5	0.09	YES
chr8	29953045	29959413	+	LEPROTL1	7	17	10	0	3	0	34	3	0.09	YES
chr2	232319979	232320111	-	NCL	11	5	45	0	1	3	61	4	0.09	YES
chr2	105706454	105708858	+	MRPS9	7	5	5	0	0	0	17	0	0.09	YES
chr2	198405162	198413059	+	MOBKL3	6	5	7	0	0	0	18	0	0.09	YES
chr16	89836668	89836971	-	FANCA	71	27	38	1	0	0	136	1	0.09	YES
chr4	1696568	1697928	-	SLBP	20	8	13	0	0	0	41	0	0.0866667	YES
chr1	154525649	154527210	-	UBE2Q1	21	20	32	3	2	0	73	5	0.0866667	YES
chr10	69692538	69695909	-	HERC4	15	26	37	2	2	0	78	4	0.0866667	YES
chr7	11101469	11101590	+	PHF14	5	10	8	0	0	1	23	1	0.0866667	YES
chr5	93966449	93978977	+	ANKRD32	24	28	9	1	3	0	61	4	0.0866667	YES
chr22	45601794	45607836	-	C22orf9	5	9	36	1	1	0	50	2	0.0866667	YES
chr9	134525630	134526196	-	RAPGEF1	10	9	5	1	0	0	24	1	0.0866667	YES
chr17	42289375	42290186	-	UBTF	18	8	51	2	1	2	77	5	0.0866667	YES
chrX	53651637	53652117	-	HUWE1	34	21	16	0	4	1	71	5	0.0866667	YES
chr2	61725928	61725999	-	XPO1	13	16	5	1	1	1	34	3	0.0833333	YES
chr19	13035818	13035903	-	FARSA	14	15	12	0	0	0	41	0	0.0833333	YES
chr2	136536650	136537752	+	UBXN4	10	15	6	0	0	0	31	0	0.0833333	YES
chr20	39800930	39801060	+	PLCG1	11	7	9	0	0	0	27	0	0.0833333	YES
chr20	21346343	21349100	+	XRN2	12	6	8	0	0	1	26	1	0.0833333	YES
chr3	47770585	47777523	-	SMARCC1	16	21	17	2	0	0	54	2	0.0833333	YES
chr7	55223640	55224225	+	EGFR	62	40	103	4	3	7	205	14	0.0833333	YES
chr13	79941008	79942864	-	RBM26	6	10	5	0	1	0	21	1	0.0833333	YES
chr5	900665	901455	+	TRIP13	16	8	12	3	0	0	36	3	0.0833333	YES
chr14	102477290	102478211	+	DYNC1H1	24	15	19	1	2	1	58	4	0.0833333	YES
chr5	94818336	94820427	-	TTC37	11	11	6	0	2	0	28	2	0.0833333	YES
chr15	59497685	59500879	-	MYO1E	24	16	47	2	3	2	87	7	0.0833333	YES
chr4	71845009	71847696	+	MOBKL1A	7	12	7	1	1	1	26	3	0.08	YES
chr1	110171118	110171264	+	AMPD2	12	8	15	0	0	2	35	2	0.08	YES
chr14	64564865	64565464	+	SYNE2	46	37	9	0	6	0	92	6	0.08	YES
chr12	104337098	104337515	+	HSP90B1	104	50	47	3	10	3	201	16	0.08	YES
chr15	25223466	25223553	+	SNURF	6	5	5	0	0	0	16	0	0.08	YES
chr16	56866301	56867126	+	NUP93	6	5	6	0	0	0	17	0	0.08	YES
chr1	226054864	226055587	-	TMEM63A	49	50	17	6	4	0	116	10	0.08	YES
chr6	33644867	33645280	+	ITPR3	46	27	67	4	3	2	140	9	0.08	YES
chr16	89642480	89643946	+	CPNE7	15	7	52	2	1	1	74	4	0.0766667	YES
chr1	160275564	160276143	-	COPA	25	28	14	4	5	1	67	10	0.0766667	YES
chr10	127412506	127413886	+	C10orf137	25	22	44	4	2	2	91	8	0.0766667	YES
chr8	97316410	97318671	+	PTDSS1	19	10	20	1	1	0	49	2	0.0766667	YES
chr15	59224643	59225602	-	SLTM	10	7	13	1	1	1	30	3	0.0766667	YES
chrX	153227100	153227672	-	HCFC1	8	7	13	0	1	0	28	1	0.0766667	YES
chr1	151372664	151372917	+	PSMB4	9	12	10	0	2	2	31	4	0.0766667	YES
chr17	40068796	40069967	-	ACLY	13	6	10	0	0	1	29	1	0.0766667	YES
chr10	105165866	105166365	+	PDCD11	12	6	15	0	0	1	33	1	0.0766667	YES
chr2	96943689	96943974	-	SNRNP200	6	6	7	0	0	1	19	1	0.0766667	YES
chr11	3707425	3712576	-	NUP98	17	5	14	1	1	0	36	2	0.0766667	YES
chr10	105181325	105182744	+	PDCD11	31	16	35	0	2	7	82	9	0.0766667	YES
chr1	22204747	22204925	-	HSPG2	13	6	5	1	0	0	24	1	0.0766667	YES
chrX	48933605	48934088	-	WDR45	6	5	17	0	0	1	28	1	0.0766667	YES
chr3	195789517	195789724	-	TFRC	70	57	12	4	6	2	139	12	0.0766667	YES
chr1	156532458	156532925	-	IQGAP3	76	63	62	4	4	0	201	8	0.0766667	YES
chr1	46488991	46489443	+	MAST2	28	5	28	1	1	0	61	2	0.0733333	YES
chr8	103300495	103301680	-	UBR5	13	17	6	2	1	0	36	3	0.0733333	YES
chr1	1341267	1342288	-	MRPL20	20	19	27	1	3	1	66	5	0.0733333	YES
chr16	30775707	30776258	+	RNF40	6	6	7	0	0	1	19	1	0.0733333	YES
chr5	175777741	175779624	-	KIAA1191	6	5	10	0	0	0	21	0	0.0733333	YES
chr14	105930905	105931010	+	MTA1	5	5	16	0	0	0	26	0	0.0733333	YES
chr17	73236494	73236892	-	GGA3	15	10	39	0	1	4	64	5	0.07	YES
chr20	60894852	60895614	-	LAMA5	103	64	104	5	12	3	271	20	0.07	YES
chr16	70599428	70601313	+	SF3B3	16	14	24	2	1	0	54	3	0.07	YES
chr11	3746450	3752620	-	NUP98	15	20	13	2	2	0	48	4	0.07	YES
chr14	102511036	102514153	+	DYNC1H1	35	24	46	2	3	0	105	5	0.07	YES
chr16	69782233	69782820	-	NOB1	14	7	12	2	0	0	33	2	0.07	YES
chr1	6592140	6592522	-	NOL9	16	8	13	1	0	2	37	3	0.07	YES
chr12	109692140	109693944	+	ACACB	7	20	8	1	3	0	35	4	0.0666667	YES
chr7	2414242	2415023	+	EIF3B	20	15	27	1	1	1	62	3	0.0666667	YES
chr17	16012227	16021201	-	NCOR1	5	15	20	0	1	4	40	5	0.0666667	YES
chr7	158485649	158486000	-	NCAPG2	22	13	9	1	0	1	44	2	0.0666667	YES
chr4	10077109	10078927	-	WDR1	10	10	23	0	0	3	43	3	0.0666667	YES
chr11	77825036	77825311	-	ALG8	7	8	13	1	1	0	28	2	0.0666667	YES
chr2	39535147	39536601	-	MAP4K3	9	14	5	0	2	1	28	3	0.0666667	YES
chr21	33713834	33716878	-	URB1	20	21	22	2	4	0	63	6	0.0666667	YES
chr3	183705706	183706359	-	ABCC5	7	5	8	0	1	0	20	1	0.0666667	YES
chr20	18523817	18526599	+	SEC23B	6	5	6	1	0	0	17	1	0.0666667	YES
chr17	38146183	38146346	+	PSMD3	19	12	13	0	0	2	44	2	0.0666667	YES
chr10	105201733	105201969	+	PDCD11	9	9	29	0	1	1	47	2	0.0633333	YES
chr12	89993077	89995102	-	ATP2B1	28	13	12	3	1	2	53	6	0.0633333	YES
chr3	47476628	47484361	-	SCAP	17	11	8	0	1	1	36	2	0.0633333	YES
chr17	46933550	46937675	+	CALCOCO2	8	10	5	1	0	0	23	1	0.0633333	YES
chr17	35582027	35583259	-	ACACA	25	23	21	2	4	3	69	9	0.0633333	YES
chr7	99695572	99695763	-	MCM7	41	11	50	0	2	1	102	3	0.0633333	YES
chr21	45175646	45175831	+	PDXK	5	5	9	0	0	0	19	0	0.0633333	YES
chrX	70355104	70356130	+	MED12	29	11	13	3	2	2	53	7	0.0633333	YES
chr17	7407111	7411569	+	POLR2A	10	8	27	2	1	5	45	8	0.06	YES
chr12	132528857	132529215	+	EP400	17	6	6	3	0	1	29	4	0.06	YES
chr16	57493633	57493962	+	COQ9	9	6	7	0	0	0	22	0	0.06	YES
chr2	111408362	111411012	-	BUB1	13	20	14	1	1	2	47	4	0.06	YES
chr11	118355030	118355576	+	MLL	16	15	7	1	0	1	38	2	0.06	YES
chr3	189681888	189688604	-	LEPREL1	19	13	24	2	0	3	56	5	0.06	YES
chr2	27560426	27560792	-	GTF3C2	17	12	9	0	0	0	38	0	0.06	YES
chr17	1370636	1370773	-	MYO1C	12	11	9	0	0	0	32	0	0.06	YES
chr16	30721450	30722074	+	SRCAP	35	20	40	3	2	0	95	5	0.06	YES
chr17	30696474	30696617	+	ZNF207	9	9	10	0	0	0	28	0	0.06	YES
chr16	74502962	74503882	-	GLG1	8	7	8	0	0	0	23	0	0.06	YES
chr9	35685778	35689142	-	TPM2	30	18	59	2	3	2	107	7	0.06	YES
chr5	137288399	137289024	-	FAM13B	7	6	8	0	0	1	21	1	0.06	YES
chr3	184648357	184654033	+	VPS8	34	25	11	1	5	1	70	7	0.06	YES
chr19	4684822	4685637	-	DPP9	13	12	37	1	2	2	62	5	0.06	YES
chr17	1557311	1558643	-	PRPF8	13	8	17	0	0	0	38	0	0.0566667	YES
chr17	65717643	65718695	+	NOL11	5	8	5	1	0	0	18	1	0.0566667	YES
chr1	53694627	53699213	-	MAGOH	18	7	24	1	1	4	49	6	0.0566667	YES
chr7	72857159	72858313	-	BAZ1B	11	6	12	0	1	0	29	1	0.0566667	YES
chr19	39321807	39321948	-	ECH1	8	6	11	0	0	0	25	0	0.0566667	YES
chr22	38890808	38890890	-	DDX17	6	5	6	1	0	0	17	1	0.0566667	YES
chr22	50632084	50632768	+	TRABD	6	9	27	1	0	2	42	3	0.0566667	YES
chr15	63354477	63354774	+	TPM1	5	6	5	0	1	0	16	1	0.0566667	YES
chr5	38482321	38482690	-	LIFR	8	5	9	0	0	1	22	1	0.0566667	YES
chr3	49008138	49011131	+	ARIH2	29	23	28	1	4	0	80	5	0.0533333	YES
chr12	101715408	101720858	+	UTP20	9	6	9	1	1	0	24	2	0.0533333	YES
chr5	134126243	134130539	+	DDX46	12	12	15	0	0	0	39	0	0.0533333	YES
chr3	58097609	58097875	+	FLNB	7	6	5	0	0	0	18	0	0.0533333	YES
chr1	114499434	114499745	+	HIPK1	6	6	5	0	0	0	17	0	0.0533333	YES
chr9	35068061	35068247	-	VCP	6	6	8	0	0	0	20	0	0.0533333	YES
chr2	11355539	11355635	-	ROCK2	19	10	12	0	2	2	41	4	0.0533333	YES
chr17	7473812	7473998	+	SENP3	9	10	13	0	2	0	32	2	0.0533333	YES
[truncated: 2,839 more rows]

## Sheet: CLIP-
chr	intron_start	intron_end	strd	gene_name	reads_AciL	reads_AciS	reads_T7Aci	reads_ContL	reads_ContS	reads_T7ContL	reads_Aci	reads_Cont	delta_pir	reliable_delta_pir
chr1	905982	906065	+	PLEKHN1	0	0	0	0	0	0	0	0	-0.676667	YES
chr1	1222680	1222887	+	SCNN1D	0	0	0	0	0	0	0	0	1.15	YES
chr1	1229314	1229469	-	ACAP3	0	0	0	0	0	0	0	0	3.34	YES
chr1	1231661	1231804	-	ACAP3	0	0	0	0	0	0	0	0	0	YES
chr1	1849602	1849691	-	TMEM52	0	0	0	0	0	0	0	0	-2.85	YES
chr1	2103630	2103739	+	PRKCZ	0	0	0	0	0	0	0	0	0.0433333	YES
chr1	3644782	3645890	+	TP73	0	0	0	0	0	0	0	0	0	YES
chr1	3698166	3699224	-	LRRC47	0	0	0	0	0	0	0	0	-0.00666667	YES
chr1	6157418	6158544	+	KCNAB2	0	0	0	0	0	0	0	0	2.53333	YES
chr1	6269257	6269327	+	RNF207	0	0	0	0	0	0	0	0	-1.09333	YES
chr1	9780968	9781184	+	PIK3CD	0	0	0	0	0	0	0	0	0	YES
chr1	9994919	9995549	-	LZIC	0	0	0	0	0	0	0	0	0.243333	YES
chr1	10067807	10068230	+	RBP7	0	0	0	0	0	0	0	0	0	YES
chr1	10190675	10190772	+	UBE4B	0	0	0	0	0	0	0	0	0.543333	YES
chr1	10396801	10397131	+	KIF1B	0	0	0	0	0	0	0	0	0	YES
chr1	10423403	10425157	+	KIF1B	0	0	0	0	0	0	0	0	0	YES
chr1	10710813	10710997	-	CASZ1	0	0	0	0	0	0	0	0	0	YES
chr1	10714276	10714475	-	CASZ1	0	0	0	0	0	0	0	0	-0.68	YES
chr1	11199493	11199589	-	MTOR	0	0	0	0	0	0	0	0	0	YES
chr1	11259461	11259597	-	MTOR	0	0	0	0	0	0	0	0	-0.22	YES
chr1	11734874	11735138	-	MAD2L2	0	0	0	0	0	0	0	0	0.06	YES
chr1	11737672	11740409	-	MAD2L2	0	0	0	0	0	0	0	0	0.0533333	YES
chr1	11898500	11898591	+	CLCN6	0	0	0	0	0	0	0	0	-1.59	YES
chr1	12320852	12321004	+	VPS13D	0	0	0	0	0	0	0	0	0	YES
chr1	12422907	12423127	+	VPS13D	0	0	0	0	0	0	0	0	0	YES
chr1	15890607	15890777	+	DNAJC16	0	0	0	0	0	0	0	0	0	YES
chr1	15892495	15892576	+	DNAJC16	0	0	0	0	0	0	0	0	-7.01	YES
chr1	16268916	16269023	-	ZBTB17	0	0	0	0	0	0	0	0	2.58333	YES
chr1	16271335	16271431	-	ZBTB17	0	0	0	0	0	0	0	0	0	YES
chr1	16532579	16532674	-	ARHGEF19	0	0	0	0	0	0	0	0	-0.223333	YES
chr1	17296949	17297130	+	CROCC	0	0	0	0	0	0	0	0	2.36667	YES
chr1	17313452	17313540	-	ATP13A2	0	0	0	0	0	0	0	0	-0.746667	YES
chr1	17318625	17318737	-	ATP13A2	0	0	0	0	0	0	0	0	-0.25	YES
chr1	17326808	17326894	-	ATP13A2	0	0	0	0	0	0	0	0	0	YES
chr1	17331317	17331508	-	ATP13A2	0	0	0	0	0	0	0	0	-0.283333	YES
chr1	17332052	17332178	-	ATP13A2	0	0	0	0	0	0	0	0	-0.483333	YES
chr1	19209693	19209772	-	ALDH4A1	0	0	0	0	0	0	0	0	-0.0566667	YES
chr1	19510391	19510509	-	UBR4	0	0	0	0	0	0	0	0	-0.21	YES
chr1	19545977	19546062	-	KIAA0090	0	0	0	0	0	0	0	0	0.153333	YES
chr1	20073093	20073655	-	TMCO4	0	0	0	0	0	0	0	0	0	YES
chr1	20828683	20829714	-	MUL1	0	0	0	0	0	0	0	0	-0.0333333	YES
chr1	21191206	21191608	-	EIF4G3	0	0	0	0	0	0	0	0	-0.08	YES
chr1	21546625	21548239	-	ECE1	0	0	0	0	0	0	0	0	0.376667	YES
chr1	21571597	21573713	-	ECE1	0	0	0	0	0	0	0	0	0	YES
chr1	21938075	21938208	-	RAP1GAP	0	0	0	0	0	0	0	0	-0.423333	YES
chr1	21940200	21940478	-	RAP1GAP	0	0	0	0	0	0	0	0	0	YES
chr1	22154413	22154522	-	HSPG2	0	0	0	0	0	0	0	0	-0.396667	YES
chr1	22182406	22183507	-	HSPG2	0	0	0	0	0	0	0	0	0.163333	YES
chr1	22201223	22201383	-	HSPG2	0	0	0	0	0	0	0	0	0	YES
chr1	22222460	22222667	-	HSPG2	0	0	0	0	0	0	0	0	0	YES
chr1	23234662	23235514	+	EPHB2	0	0	0	0	0	0	0	0	0	YES
chr1	23239093	23239954	+	EPHB2	0	0	0	0	0	0	0	0	-0.583333	YES
chr1	23760026	23760118	-	ASAP3	0	0	0	0	0	0	0	0	0	YES
chr1	23782520	23782614	-	ASAP3	0	0	0	0	0	0	0	0	0	YES
chr1	24175330	24180849	-	FUCA1	0	0	0	0	0	0	0	0	0.45	YES
chr1	25551592	25553932	-	SYF2	0	0	0	0	0	0	0	0	0.186667	YES
chr1	26140485	26140567	+	SEPN1	0	0	0	0	0	0	0	0	-1.45667	YES
chr1	26301142	26303172	-	PAFAH2	0	0	0	0	0	0	0	0	0	YES
chr1	26507102	26507205	+	CNKSR1	0	0	0	0	0	0	0	0	1.33333	YES
chr1	26509748	26509836	+	CNKSR1	0	0	0	0	0	0	0	0	-0.07	YES
chr1	26510322	26510561	+	CNKSR1	0	0	0	0	0	0	0	0	3.53333	YES
chr1	26898102	26898339	+	RPS6KA1	0	0	0	0	0	0	0	0	-0.306667	YES
chr1	27087588	27087874	+	ARID1A	0	0	0	0	0	0	0	0	0	YES
chr1	27100209	27100292	+	ARID1A	0	0	0	0	0	0	0	0	-0.323333	YES
chr1	27432579	27434138	-	SLC9A1	0	0	0	0	0	0	0	0	0	YES
chr1	27608777	27609828	+	WDTC1	0	0	0	0	0	0	0	0	0	YES
chr1	27682591	27682878	-	MAP3K6	0	0	0	0	0	0	0	0	-0.443333	YES
chr1	27682992	27683080	-	MAP3K6	0	0	0	0	0	0	0	0	-0.58	YES
chr1	27684068	27684201	-	MAP3K6	0	0	0	0	0	0	0	0	1.23333	YES
chr1	27685103	27685199	-	MAP3K6	0	0	0	0	0	0	0	0	0	YES
chr1	27879441	27879584	-	AHDC1	0	0	0	0	0	0	0	0	0	YES
chr1	27992987	27994736	-	IFI6	0	0	0	0	0	0	0	0	-0.0333333	YES
chr1	27994887	27994968	-	IFI6	0	0	0	0	0	0	0	0	0.02	YES
chr1	28279870	28280864	+	SMPDL3B	0	0	0	0	0	0	0	0	0.563333	YES
chr1	28281038	28282194	+	SMPDL3B	0	0	0	0	0	0	0	0	0	YES
chr1	28282376	28282459	+	SMPDL3B	0	0	0	0	0	0	0	0	0	YES
chr1	29357000	29359604	+	EPB41	0	0	0	0	0	0	0	0	0	YES
chr1	29631362	29631863	+	PTPRU	0	0	0	0	0	0	0	0	0	YES
chr1	29638066	29638154	+	PTPRU	0	0	0	0	0	0	0	0	0	YES
chr1	29638272	29639063	+	PTPRU	0	0	0	0	0	0	0	0	-0.12	YES
chr1	29651839	29652110	+	PTPRU	0	0	0	0	0	0	0	0	0.33	YES
chr1	32052357	32052439	+	TINAGL1	0	0	0	0	0	0	0	0	-0.143333	YES
chr1	32207327	32207400	-	BAI2	0	0	0	0	0	0	0	0	-1.01	YES
chr1	32797184	32797276	+	HDAC1	0	0	0	0	0	0	0	0	0.276667	YES
chr1	33361345	33361510	-	TMEM54	0	0	0	0	0	0	0	0	-1.69333	YES
chr1	33760617	33760747	+	ZNF362	0	0	0	0	0	0	0	0	0	YES
chr1	33760907	33764530	+	ZNF362	0	0	0	0	0	0	0	0	-0.813333	YES
chr1	35220797	35222907	+	GJB5	0	0	0	0	0	0	0	0	-1.08667	YES
chr1	35915607	35915958	-	KIAA0319L	0	0	0	0	0	0	0	0	0.0366667	YES
chr1	36203699	36204055	-	CLSPN	0	0	0	0	0	0	0	0	0	YES
chr1	36204184	36204736	-	CLSPN	0	0	0	0	0	0	0	0	0.336667	YES
chr1	36204859	36204965	-	CLSPN	0	0	0	0	0	0	0	0	-0.17	YES
chr1	36226518	36226696	-	CLSPN	0	0	0	0	0	0	0	0	-0.203333	YES
chr1	36645159	36645266	+	MAP7D1	0	0	0	0	0	0	0	0	0.176667	YES
chr1	36809581	36809720	-	STK40	0	0	0	0	0	0	0	0	-3.18667	YES
chr1	36898191	36904356	-	OSCP1	0	0	0	0	0	0	0	0	0	YES
chr1	37974925	37975055	-	MEAF6	0	0	0	0	0	0	0	0	0	YES
chr1	38148833	38148990	-	C1orf109	0	0	0	0	0	0	0	0	-0.166667	YES
chr1	38352677	38353022	-	INPP5B	0	0	0	0	0	0	0	0	0	YES
chr1	38464821	38464928	-	FHL3	0	0	0	0	0	0	0	0	0	YES
chr1	39750883	39750968	+	MACF1	0	0	0	0	0	0	0	0	0	YES
chr1	39782202	39782885	+	MACF1	0	0	0	0	0	0	0	0	0	YES
chr1	39788388	39788581	+	MACF1	0	0	0	0	0	0	0	0	0	YES
chr1	39790018	39790317	+	MACF1	0	0	0	0	0	0	0	0	0	YES
chr1	39826674	39827031	+	MACF1	0	0	0	0	0	0	0	0	0	YES
chr1	40433589	40434005	+	MFSD2A	0	0	0	0	0	0	0	0	-5.68	YES
chr1	40530043	40530145	+	CAP1	0	0	0	0	0	0	0	0	-0.00333333	YES
chr1	41006385	41007286	+	ZNF684	0	0	0	0	0	0	0	0	-0.69	YES
chr1	43218041	43218207	-	LEPRE1	0	0	0	0	0	0	0	0	0	YES
chr1	43908939	43909022	+	KIAA0467	0	0	0	0	0	0	0	0	0	YES
chr1	43913370	43913519	+	KIAA0467	0	0	0	0	0	0	0	0	-1.93333	YES
chr1	43914156	43914282	+	KIAA0467	0	0	0	0	0	0	0	0	-8.67667	YES
chr1	43917519	43917605	-	HYI	0	0	0	0	0	0	0	0	1.84333	YES
chr1	44386223	44386453	+	ST3GAL3	0	0	0	0	0	0	0	0	0	YES
chr1	44426686	44426837	+	IPO13	0	0	0	0	0	0	0	0	-0.04	YES
chr1	44433169	44433257	+	IPO13	0	0	0	0	0	0	0	0	-0.11	YES
chr1	44460835	44461272	+	CCDC24	0	0	0	0	0	0	0	0	1.43	YES
chr1	44461343	44461449	+	CCDC24	0	0	0	0	0	0	0	0	-0.863333	YES
chr1	44461529	44461609	+	CCDC24	0	0	0	0	0	0	0	0	-1.69667	YES
chr1	45267424	45267516	+	PLK3	0	0	0	0	0	0	0	0	-0.806667	YES
chr1	45470479	45471465	-	HECTD3	0	0	0	0	0	0	0	0	-0.496667	YES
chr1	45472944	45473084	-	HECTD3	0	0	0	0	0	0	0	0	0.153333	YES
chr1	45475155	45475239	-	HECTD3	0	0	0	0	0	0	0	0	0	YES
chr1	45476379	45476560	-	HECTD3	0	0	0	0	0	0	0	0	-0.0166667	YES
chr1	45485820	45486296	-	ZSWIM5	0	0	0	0	0	0	0	0	0.5	YES
chr1	45501496	45501710	-	ZSWIM5	0	0	0	0	0	0	0	0	1.34	YES
chr1	45504746	45506063	-	ZSWIM5	0	0	0	0	0	0	0	0	0	YES
chr1	45524432	45525770	-	ZSWIM5	0	0	0	0	0	0	0	0	0	YES
chr1	45797007	45797091	-	MUTYH	0	0	0	0	0	0	0	0	1.92667	YES
chr1	46650788	46650896	+	TSPAN1	0	0	0	0	0	0	0	0	-0.57	YES
chr1	46650981	46651157	+	TSPAN1	0	0	0	0	0	0	0	0	2.22333	YES
chr1	46657896	46657979	-	POMGNT1	0	0	0	0	0	0	0	0	-0.57	YES
chr1	46743653	46743743	+	RAD54L	0	0	0	0	0	0	0	0	0.68	YES
chr1	53262064	53262405	+	ZYG11B	0	0	0	0	0	0	0	0	0	YES
chr1	53362270	53363108	-	ECHDC2	0	0	0	0	0	0	0	0	-2.38	YES
chr1	54344076	54344314	-	YIPF1	0	0	0	0	0	0	0	0	0	YES
chr1	55599837	55600000	-	USP24	0	0	0	0	0	0	0	0	0	YES
chr1	62228587	62228684	+	INADL	0	0	0	0	0	0	0	0	1.15	YES
chr1	62941615	62941737	-	DOCK7	0	0	0	0	0	0	0	0	-0.22	YES
chr1	63099250	63100443	-	DOCK7	0	0	0	0	0	0	0	0	0	YES
chr1	63269534	63270842	+	ATG4C	0	0	0	0	0	0	0	0	0	YES
chr1	65309899	65310436	-	JAK1	0	0	0	0	0	0	0	0	-0.09	YES
chr1	65831618	65831730	+	DNAJC6	0	0	0	0	0	0	0	0	0	YES
chr1	65852613	65854018	+	DNAJC6	0	0	0	0	0	0	0	0	0	YES
chr1	65855133	65855229	+	DNAJC6	0	0	0	0	0	0	0	0	0	YES
chr1	70832221	70833299	+	HHLA3	0	0	0	0	0	0	0	0	-0.383333	YES
chr1	78046755	78047460	-	ZZZ3	0	0	0	0	0	0	0	0	-0.0233333	YES
chr1	82432294	82433709	+	LPHN2	0	0	0	0	0	0	0	0	0	YES
chr1	82435072	82435997	+	LPHN2	0	0	0	0	0	0	0	0	0	YES
chr1	82436219	82437535	+	LPHN2	0	0	0	0	0	0	0	0	-0.563333	YES
chr1	82450396	82450942	+	LPHN2	0	0	0	0	0	0	0	0	0	YES
chr1	85029102	85029417	-	CTBS	0	0	0	0	0	0	0	0	0	YES
chr1	85403561	85403663	-	MCOLN2	0	0	0	0	0	0	0	0	0	YES
chr1	85498476	85498554	-	MCOLN3	0	0	0	0	0	0	0	0	0	YES
chr1	85787252	85790422	-	DDAH1	0	0	0	0	0	0	0	0	-0.09	YES
chr1	85790567	85816097	-	DDAH1	0	0	0	0	0	0	0	0	0.06	YES
chr1	85816218	85817188	-	DDAH1	0	0	0	0	0	0	0	0	0	YES
chr1	85817263	85824430	-	DDAH1	0	0	0	0	0	0	0	0	0	YES
chr1	89325695	89325822	-	GTF2B	0	0	0	0	0	0	0	0	-0.0166667	YES
chr1	89418836	89420831	-	CCBL2	0	0	0	0	0	0	0	0	0	YES
chr1	89434498	89435091	-	CCBL2	0	0	0	0	0	0	0	0	-0.126667	YES
chr1	89474824	89475074	-	GBP3	0	0	0	0	0	0	0	0	0	YES
chr1	89575554	89575846	-	GBP2	0	0	0	0	0	0	0	0	0	YES
chr1	93705031	93705239	+	CCDC18	0	0	0	0	0	0	0	0	-0.283333	YES
chr1	95358074	95360373	+	SLC44A3	0	0	0	0	0	0	0	0	0	YES
chr1	95368745	95368958	-	CNN3	0	0	0	0	0	0	0	0	0.97	YES
chr1	99156742	99157090	+	SNX7	0	0	0	0	0	0	0	0	0	YES
chr1	100177720	100177973	-	FRRS1	0	0	0	0	0	0	0	0	0	YES
chr1	100178072	100181141	-	FRRS1	0	0	0	0	0	0	0	0	-0.776667	YES
chr1	100214325	100214452	-	FRRS1	0	0	0	0	0	0	0	0	3.15333	YES
chr1	100378074	100379082	+	AGL	0	0	0	0	0	0	0	0	0	YES
chr1	109807251	109807489	+	CELSR2	0	0	0	0	0	0	0	0	0	YES
chr1	109807632	109807812	+	CELSR2	0	0	0	0	0	0	0	0	-0.3	YES
chr1	109815351	109815454	+	CELSR2	0	0	0	0	0	0	0	0	0.16	YES
chr1	109815959	109816057	+	CELSR2	0	0	0	0	0	0	0	0	-1.23667	YES
chr1	110009520	110009680	+	SYPL2	0	0	0	0	0	0	0	0	0.63	YES
chr1	110173416	110173564	+	AMPD2	0	0	0	0	0	0	0	0	0.02	YES
chr1	110603664	110604056	-	ALX3	0	0	0	0	0	0	0	0	0	YES
chr1	113253234	113253365	-	PPM1J	0	0	0	0	0	0	0	0	0	YES
chr1	113642905	113643041	+	LRIG2	0	0	0	0	0	0	0	0	0	YES
chr1	114438115	114438378	-	AP4B1	0	0	0	0	0	0	0	0	0.406667	YES
chr1	114438661	114438879	-	AP4B1	0	0	0	0	0	0	0	0	2.17	YES
chr1	114439088	114440461	-	AP4B1	0	0	0	0	0	0	0	0	0.93	YES
chr1	114440566	114441339	-	AP4B1	0	0	0	0	0	0	0	0	1.75	YES
chr1	114441424	114442525	-	AP4B1	0	0	0	0	0	0	0	0	0.836667	YES
chr1	114443023	114443857	-	AP4B1	0	0	0	0	0	0	0	0	1.81667	YES
chr1	145457105	145457235	-	POLR3GL	0	0	0	0	0	0	0	0	-1.05667	YES
chr1	145458004	145459651	-	POLR3GL	0	0	0	0	0	0	0	0	0	YES
chr1	150676671	150676752	-	HORMAD1	0	0	0	0	0	0	0	0	0	YES
chr1	150999804	151001261	+	PRUNE	0	0	0	0	0	0	0	0	-0.28	YES
chr1	151089993	151090432	+	GABPB2	0	0	0	0	0	0	0	0	0	YES
chr1	151337182	151337401	-	SELENBP1	0	0	0	0	0	0	0	0	-0.0433333	YES
chr1	151337521	151337664	-	SELENBP1	0	0	0	0	0	0	0	0	1.03667	YES
chr1	151338161	151338243	-	SELENBP1	0	0	0	0	0	0	0	0	0.103333	YES
chr1	151498267	151499450	+	CGN	0	0	0	0	0	0	0	0	-1.23333	YES
chr1	151499584	151501825	+	CGN	0	0	0	0	0	0	0	0	0	YES
chr1	151509370	151509680	+	CGN	0	0	0	0	0	0	0	0	-0.933333	YES
chr1	151747283	151747540	-	TDRKH	0	0	0	0	0	0	0	0	0.28	YES
chr1	151747643	151747867	-	TDRKH	0	0	0	0	0	0	0	0	0	YES
chr1	151751483	151751578	-	TDRKH	0	0	0	0	0	0	0	0	0.32	YES
chr1	153534068	153536209	-	S100A2	0	0	0	0	0	0	0	0	0.0833333	YES
chr1	154898960	154901499	-	PMVK	0	0	0	0	0	0	0	0	0.0633333	YES
chr1	154920025	154920117	-	PBXIP1	0	0	0	0	0	0	0	0	0	YES
chr1	155110575	155110655	+	RAG1AP1	0	0	0	0	0	0	0	0	-0.606667	YES
chr1	155790448	155791264	-	GON4L	0	0	0	0	0	0	0	0	0	YES
chr1	156263001	156263110	-	C1orf85	0	0	0	0	0	0	0	0	-0.07	YES
chr1	156264028	156264155	-	C1orf85	0	0	0	0	0	0	0	0	-0.37	YES
chr1	156612068	156615838	+	BCAN	0	0	0	0	0	0	0	0	0	YES
chr1	156615938	156616592	+	BCAN	0	0	0	0	0	0	0	0	0	YES
chr1	156705702	156706423	+	C1orf66	0	0	0	0	0	0	0	0	-1.38	YES
chr1	158059419	158059507	+	KIRREL	0	0	0	0	0	0	0	0	0.3	YES
chr1	160261720	160261801	-	COPA	0	0	0	0	0	0	0	0	0.11	YES
chr1	160969538	160969665	-	F11R	0	0	0	0	0	0	0	0	-0.17	YES
chr1	160970568	160970809	-	F11R	0	0	0	0	0	0	0	0	-0.143333	YES
chr1	161136725	161136889	+	PPOX	0	0	0	0	0	0	0	0	-1.41	YES
chr1	161198295	161198504	+	TOMM40L	0	0	0	0	0	0	0	0	-0.66	YES
chr1	161334941	161335315	-	C1orf192	0	0	0	0	0	0	0	0	0	YES
chr1	161335493	161335987	-	C1orf192	0	0	0	0	0	0	0	0	0	YES
chr1	161336069	161336228	-	C1orf192	0	0	0	0	0	0	0	0	0	YES
chr1	161722255	161722864	+	DUSP12	0	0	0	0	0	0	0	0	-0.14	YES
chr1	169952524	169953722	-	KIFAP3	0	0	0	0	0	0	0	0	0	YES
chr1	172538283	172539186	+	C1orf9	0	0	0	0	0	0	0	0	0	YES
chr1	173799900	173800672	+	DARS2	0	0	0	0	0	0	0	0	0.0233333	YES
chr1	173822706	173822932	+	DARS2	0	0	0	0	0	0	0	0	0.0466667	YES
chr1	180158810	180159567	+	QSOX1	0	0	0	0	0	0	0	0	0	YES
chr1	180240670	180240969	+	LHX4	0	0	0	0	0	0	0	0	13.9567	YES
chr1	183085811	183085901	+	LAMC1	0	0	0	0	0	0	0	0	0	YES
chr1	183091080	183091197	+	LAMC1	0	0	0	0	0	0	0	0	0.0633333	YES
chr1	183529409	183532329	-	NCF2	0	0	0	0	0	0	0	0	1.49333	YES
chr1	183532442	183532568	-	NCF2	0	0	0	0	0	0	0	0	0.653333	YES
chr1	184686147	184686673	-	EDEM3	0	0	0	0	0	0	0	0	0	YES
chr1	186291545	186291649	-	TPR	0	0	0	0	0	0	0	0	-0.0666667	YES
chr1	193045778	193046042	+	TROVE2	0	0	0	0	0	0	0	0	0.306667	YES
chr1	193051430	193051691	+	TROVE2	0	0	0	0	0	0	0	0	-0.673333	YES
chr1	197875028	197876278	+	C1orf53	0	0	0	0	0	0	0	0	-0.0733333	YES
chr1	201777739	201777830	+	NAV1	0	0	0	0	0	0	0	0	-0.4	YES
chr1	201780886	201781030	+	NAV1	0	0	0	0	0	0	0	0	0	YES
chr1	201782387	201786215	+	NAV1	0	0	0	0	0	0	0	0	-0.49	YES
chr1	201860697	201860927	+	SHISA4	0	0	0	0	0	0	0	0	0	YES
chr1	203676352	203676989	+	ATP2B4	0	0	0	0	0	0	0	0	0.223333	YES
chr1	203680237	203681087	+	ATP2B4	0	0	0	0	0	0	0	0	0	YES
chr1	204109247	204110442	-	ETNK2	0	0	0	0	0	0	0	0	0	YES
chr1	205132135	205132850	-	DSTYK	0	0	0	0	0	0	0	0	0	YES
chr1	207642061	207642144	+	CR2	0	0	0	0	0	0	0	0	0	YES
chr1	207643448	207644084	+	CR2	0	0	0	0	0	0	0	0	0	YES
chr1	207647231	207647585	+	CR2	0	0	0	0	0	0	0	0	0	YES
chr1	207651416	207652601	+	CR2	0	0	0	0	0	0	0	0	0.813333	YES
chr1	208206855	208207837	-	PLXNA2	0	0	0	0	0	0	0	0	0.653333	YES
chr1	208211820	208212169	-	PLXNA2	0	0	0	0	0	0	0	0	0	YES
chr1	208224769	208225671	-	PLXNA2	0	0	0	0	0	0	0	0	0	YES
chr1	209796525	209796849	-	LAMB3	0	0	0	0	0	0	0	0	-0.416667	YES
chr1	211847856	211848725	-	NEK2	0	0	0	0	0	0	0	0	0	YES
chr1	215775297	215775426	+	KCTD3	0	0	0	0	0	0	0	0	0	YES
chr1	220142299	220142399	-	EPRS	0	0	0	0	0	0	0	0	0.27	YES
chr1	220275947	220276028	+	IARS2	0	0	0	0	0	0	0	0	0	YES
chr1	222761908	222763068	-	TAF1A	0	0	0	0	0	0	0	0	0	YES
chr1	222832856	222832963	+	MIA3	0	0	0	0	0	0	0	0	-0.0333333	YES
chr1	227300124	227300371	-	CDC42BPA	0	0	0	0	0	0	0	0	0	YES
chr1	228284964	228285042	+	ARF1	0	0	0	0	0	0	0	0	-0.0366667	YES
chr1	229631313	229631638	-	NUP133	0	0	0	0	0	0	0	0	0.373333	YES
chr1	231362572	231362718	-	C1orf131	0	0	0	0	0	0	0	0	-0.453333	YES
chr1	231411067	231411150	+	GNPAT	0	0	0	0	0	0	0	0	0.36	YES
chr1	236708216	236711311	+	LGALS8	0	0	0	0	0	0	0	0	-3.12667	YES
chr1	236767428	236767721	-	HEATR1	0	0	0	0	0	0	0	0	0.126667	YES
chr1	237015938	237016247	+	MTR	0	0	0	0	0	0	0	0	0	YES
chr1	245246787	245246923	+	EFCAB2	0	0	0	0	0	0	0	0	0	YES
chr1	246923379	246923472	+	SCCPDH	0	0	0	0	0	0	0	0	0	YES
chr10	436034	436203	-	DIP2C	0	0	0	0	0	0	0	0	0	YES
chr10	3180317	3180426	-	PITRM1	0	0	0	0	0	0	0	0	0.18	YES
chr10	5925131	5925931	-	ANKRD16	0	0	0	0	0	0	0	0	0.69	YES
chr10	6263491	6263603	+	PFKFB3	0	0	0	0	0	0	0	0	0	YES
chr10	8055801	8056599	+	TAF3	0	0	0	0	0	0	0	0	0.26	YES
chr10	12160918	12162180	+	DHTKD1	0	0	0	0	0	0	0	0	0	YES
chr10	12203121	12204211	+	SEC61A2	0	0	0	0	0	0	0	0	-0.513333	YES
chr10	13214481	13214624	+	MCM10	0	0	0	0	0	0	0	0	0.653333	YES
chr10	14881985	14882073	+	HSPA14	0	0	0	0	0	0	0	0	-0.11	YES
chr10	14909295	14909734	+	HSPA14	0	0	0	0	0	0	0	0	-0.36	YES
chr10	16859084	16859313	-	RSU1	0	0	0	0	0	0	0	0	-1.27	YES
chr10	23408381	23409686	+	MSRB2	0	0	0	0	0	0	0	0	-0.776667	YES
chr10	24809183	24810710	+	KIAA1217	0	0	0	0	0	0	0	0	0	YES
chr10	25310838	25312104	+	THNSL1	0	0	0	0	0	0	0	0	0.313333	YES
chr10	29812957	29813400	-	SVIL	0	0	0	0	0	0	0	0	0	YES
chr10	29818774	29819535	-	SVIL	0	0	0	0	0	0	0	0	0	YES
chr10	32326307	32326447	-	KIF5B	0	0	0	0	0	0	0	0	0	YES
chr10	50944224	50944402	-	OGDHL	0	0	0	0	0	0	0	0	-0.736667	YES
chr10	50945905	50945992	-	OGDHL	0	0	0	0	0	0	0	0	-1.9	YES
chr10	62631410	62631942	-	RHOBTB1	0	0	0	0	0	0	0	0	0.256667	YES
chr10	65357905	65358929	+	REEP3	0	0	0	0	0	0	0	0	0	YES
chr10	70143672	70143807	-	RUFY2	0	0	0	0	0	0	0	0	0	YES
chr10	70673036	70673146	+	DDX50	0	0	0	0	0	0	0	0	0	YES
chr10	70764882	70765487	+	KIAA1279	0	0	0	0	0	0	0	0	0	YES
chr10	70980255	70986962	+	HKDC1	0	0	0	0	0	0	0	0	0.81	YES
chr10	71010192	71010288	+	HKDC1	0	0	0	0	0	0	0	0	-0.426667	YES
chr10	72293830	72294180	+	KIAA1274	0	0	0	0	0	0	0	0	0	YES
chr10	72636419	72636951	+	SGPL1	0	0	0	0	0	0	0	0	0	YES
chr10	74916212	74916325	-	ECD	0	0	0	0	0	0	0	0	0	YES
chr10	75301280	75301390	-	USP54	0	0	0	0	0	0	0	0	0	YES
chr10	75529492	75529593	+	SEC24C	0	0	0	0	0	0	0	0	-0.166667	YES
chr10	75562840	75562946	-	NDST2	0	0	0	0	0	0	0	0	-5.44333	YES
chr10	75565528	75565657	-	NDST2	0	0	0	0	0	0	0	0	0.116667	YES
chr10	75883669	75884137	-	AP3M1	0	0	0	0	0	0	0	0	0.146667	YES
chr10	75884283	75885905	-	AP3M1	0	0	0	0	0	0	0	0	0.216667	YES
chr10	75889000	75889664	-	AP3M1	0	0	0	0	0	0	0	0	0	YES
chr10	76780572	76780883	+	MYST4	0	0	0	0	0	0	0	0	0	YES
chr10	79571816	79571972	-	DLG5	0	0	0	0	0	0	0	0	0.383333	YES
chr10	81064989	81065289	+	ZMIZ1	0	0	0	0	0	0	0	0	-0.53	YES
chr10	87482899	87484108	-	GRID1	0	0	0	0	0	0	0	0	0	YES
chr10	87614373	87615785	-	GRID1	0	0	0	0	0	0	0	0	0	YES
chr10	89473068	89473800	+	PAPSS2	0	0	0	0	0	0	0	0	0	YES
chr10	89474621	89474741	+	PAPSS2	0	0	0	0	0	0	0	0	0	YES
chr10	89501128	89503129	+	PAPSS2	0	0	0	0	0	0	0	0	0	YES
chr10	89504989	89505588	+	PAPSS2	0	0	0	0	0	0	0	0	2.96667	YES
chr10	90341467	90341958	-	RNLS	0	0	0	0	0	0	0	0	0	YES
chr10	90699456	90700985	-	ACTA2	0	0	0	0	0	0	0	0	-2.81	YES
chr10	90707144	90708558	-	ACTA2	0	0	0	0	0	0	0	0	-0.04	YES
chr10	93220323	93221010	+	HECTD2	0	0	0	0	0	0	0	0	0	YES
chr10	93257940	93258628	+	HECTD2	0	0	0	0	0	0	0	0	0	YES
chr10	93590772	93590859	+	TNKS2	0	0	0	0	0	0	0	0	0	YES
chr10	94366474	94366915	+	KIF11	0	0	0	0	0	0	0	0	0	YES
chr10	94714499	94715336	+	EXOC6	0	0	0	0	0	0	0	0	0	YES
chr10	95351870	95353579	-	RBP4	0	0	0	0	0	0	0	0	0	YES
chr10	95360561	95360674	-	RBP4	0	0	0	0	0	0	0	0	0	YES
chr10	95360804	95360927	-	RBP4	0	0	0	0	0	0	0	0	0	YES
chr10	98988983	98989520	-	ARHGAP19	0	0	0	0	0	0	0	0	0	YES
chr10	103292190	103292708	+	BTRC	0	0	0	0	0	0	0	0	0.173333	YES
chr10	103360620	103360959	+	DPCD	0	0	0	0	0	0	0	0	0.283333	YES
chr10	103371168	103371384	-	FBXW4	0	0	0	0	0	0	0	0	0.193333	YES
chr10	103869265	103869356	-	LDB1	0	0	0	0	0	0	0	0	-0.24	YES
chr10	104184318	104184405	-	CUEDC2	0	0	0	0	0	0	0	0	0	YES
chr10	104233499	104233575	+	TMEM180	0	0	0	0	0	0	0	0	-6.06667	YES
chr10	105046917	105048116	+	INA	0	0	0	0	0	0	0	0	0.533333	YES
chr10	105139529	105139640	+	TAF5	0	0	0	0	0	0	0	0	0	YES
chr10	105147110	105147277	+	TAF5	0	0	0	0	0	0	0	0	-1.04667	YES
chr10	105761331	105761929	+	SLK	0	0	0	0	0	0	0	0	0	YES
chr10	111637626	111637757	-	XPNPEP1	0	0	0	0	0	0	0	0	0	YES
chr10	112349467	112349649	+	SMC3	0	0	0	0	0	0	0	0	0	YES
chr10	112360305	112360779	+	SMC3	0	0	0	0	0	0	0	0	-0.0433333	YES
chr10	113928283	113928610	-	GPAM	0	0	0	0	0	0	0	0	0	YES
chr10	115605563	115606960	-	DCLRE1A	0	0	0	0	0	0	0	0	0	YES
chr10	116225587	116227939	-	ABLIM1	0	0	0	0	0	0	0	0	0	YES
chr10	120928046	120928688	-	PRDX3	0	0	0	0	0	0	0	0	0	YES
chr10	121551549	121551668	+	INPP5F	0	0	0	0	0	0	0	0	-1.87667	YES
chr10	124268287	124269611	+	HTRA1	0	0	0	0	0	0	0	0	0	YES
chr10	124742987	124745815	+	PSTK	0	0	0	0	0	0	0	0	-2.28667	YES
chr10	124800189	124800724	+	ACADSB	0	0	0	0	0	0	0	0	0.366667	YES
chr10	124804002	124806724	+	ACADSB	0	0	0	0	0	0	0	0	0	YES
chr10	124812677	124813210	+	ACADSB	0	0	0	0	0	0	0	0	0	YES
chr10	126086672	126089408	-	OAT	0	0	0	0	0	0	0	0	0.03	YES
chr10	126097207	126097309	-	OAT	0	0	0	0	0	0	0	0	0.0366667	YES
chr10	127526957	127527569	-	DHX32	0	0	0	0	0	0	0	0	0.643333	YES
chr10	128821589	128822948	+	DOCK1	0	0	0	0	0	0	0	0	0	YES
chr10	128830018	128830400	+	DOCK1	0	0	0	0	0	0	0	0	0	YES
chr10	129172131	129172321	+	DOCK1	0	0	0	0	0	0	0	0	0	YES
chr10	129207443	129207576	+	DOCK1	0	0	0	0	0	0	0	0	-1.48333	YES
chr10	129216806	129217929	+	DOCK1	0	0	0	0	0	0	0	0	0	YES
chr10	134563117	134563274	+	INPP5A	0	0	0	0	0	0	0	0	0	YES
chr11	216719	218831	-	SIRT3	0	0	0	0	0	0	0	0	1.65333	YES
chr11	233216	233342	-	SIRT3	0	0	0	0	0	0	0	0	0	YES
chr11	244076	244160	+	PSMD13	0	0	0	0	0	0	0	0	-0.04	YES
chr11	375528	375638	+	B4GALNT4	0	0	0	0	0	0	0	0	0	YES
chr11	380020	380129	+	B4GALNT4	0	0	0	0	0	0	0	0	-2.45	YES
chr11	404136	404235	+	PKP3	0	0	0	0	0	0	0	0	0.0466667	YES
chr11	406994	407061	-	SIGIRR	0	0	0	0	0	0	0	0	-2.16	YES
chr11	489515	489587	+	PTDSS2	0	0	0	0	0	0	0	0	-1.30333	YES
chr11	533359	533452	-	HRAS	0	0	0	0	0	0	0	0	0.336667	YES
chr11	700236	700614	+	TMEM80	0	0	0	0	0	0	0	0	-12.8033	YES
chr11	802598	802681	-	LRDD	0	0	0	0	0	0	0	0	-2.41667	YES
chr11	869957	870120	-	CHID1	0	0	0	0	0	0	0	0	-0.16	YES
chr11	1579502	1580118	-	DUSP8	0	0	0	0	0	0	0	0	1.37	YES
chr11	1774901	1775032	-	CTSD	0	0	0	0	0	0	0	0	0	YES
chr11	1775132	1775223	-	CTSD	0	0	0	0	0	0	0	0	0.0333333	YES
chr11	2417945	2418033	+	CD81	0	0	0	0	0	0	0	0	-0.04	YES
chr11	4104213	4104492	+	STIM1	0	0	0	0	0	0	0	0	0	YES
chr11	4407084	4407386	-	TRIM21	0	0	0	0	0	0	0	0	1.09333	YES
chr11	4411689	4414862	-	TRIM21	0	0	0	0	0	0	0	0	0	YES
chr11	4622057	4622256	-	TRIM68	0	0	0	0	0	0	0	0	1.58667	YES
chr11	6243840	6244040	-	FAM160A2	0	0	0	0	0	0	0	0	0.0166667	YES
chr11	6414618	6414846	+	SMPD1	0	0	0	0	0	0	0	0	-0.0833333	YES
chr11	6416932	6417015	-	APBB1	0	0	0	0	0	0	0	0	0.416667	YES
chr11	6424439	6424548	-	APBB1	0	0	0	0	0	0	0	0	0	YES
chr11	6424635	6424717	-	APBB1	0	0	0	0	0	0	0	0	0	YES
chr11	6478707	6478925	-	TRIM3	0	0	0	0	0	0	0	0	3.16333	YES
chr11	8111209	8111615	+	TUB	0	0	0	0	0	0	0	0	0.4	YES
chr11	8719184	8720479	-	ST5	0	0	0	0	0	0	0	0	-5.48667	YES
chr11	9802064	9803053	-	SBF2	0	0	0	0	0	0	0	0	-8.38	YES
chr11	9803186	9805897	-	SBF2	0	0	0	0	0	0	0	0	0	YES
chr11	9805986	9806671	-	SBF2	0	0	0	0	0	0	0	0	2.63333	YES
chr11	9806866	9809180	-	SBF2	0	0	0	0	0	0	0	0	2.65667	YES
chr11	9809286	9810655	-	SBF2	0	0	0	0	0	0	0	0	-0.466667	YES
chr11	9810890	9812102	-	SBF2	0	0	0	0	0	0	0	0	-1.19333	YES
chr11	9812231	9817377	-	SBF2	0	0	0	0	0	0	0	0	-0.546667	YES
chr11	9829733	9830447	-	SBF2	0	0	0	0	0	0	0	0	-12.4367	YES
chr11	10785984	10786094	+	CTR9	0	0	0	0	0	0	0	0	0.196667	YES
chr11	10794203	10794673	+	CTR9	0	0	0	0	0	0	0	0	-0.00666667	YES
chr11	11976492	11976580	+	USP47	0	0	0	0	0	0	0	0	-0.55	YES
chr11	12245049	12246219	+	MICAL2	0	0	0	0	0	0	0	0	0	YES
chr11	12247918	12248571	+	MICAL2	0	0	0	0	0	0	0	0	0	YES
chr11	12495382	12495459	+	PARVA	0	0	0	0	0	0	0	0	-0.236667	YES
chr11	16837812	16838346	-	PLEKHA7	0	0	0	0	0	0	0	0	0	YES
chr11	17035749	17035862	-	PLEKHA7	0	0	0	0	0	0	0	0	-12.0933	YES
chr11	17522698	17523028	-	USH1C	0	0	0	0	0	0	0	0	-0.853333	YES
chr11	18332999	18333460	-	HPS5	0	0	0	0	0	0	0	0	0	YES
chr11	19167851	19169142	+	ZDHHC13	0	0	0	0	0	0	0	0	0	YES
chr11	20127274	20129209	+	NAV2	0	0	0	0	0	0	0	0	0	YES
chr11	27360583	27362242	-	CCDC34	0	0	0	0	0	0	0	0	-0.12	YES
chr11	27362385	27362938	-	CCDC34	0	0	0	0	0	0	0	0	0	YES
chr11	27395224	27395521	-	LGR4	0	0	0	0	0	0	0	0	-0.776667	YES
chr11	27402259	27402441	-	LGR4	0	0	0	0	0	0	0	0	1.18	YES
chr11	27405955	27406799	-	LGR4	0	0	0	0	0	0	0	0	0	YES
chr11	31391460	31392262	+	DNAJC24	0	0	0	0	0	0	0	0	0	YES
chr11	31815102	31815199	-	PAX6	0	0	0	0	0	0	0	0	0	YES
chr11	31815351	31815579	-	PAX6	0	0	0	0	0	0	0	0	-1.45	YES
chr11	32610682	32611092	+	EIF3M	0	0	0	0	0	0	0	0	-0.0466667	YES
chr11	33120311	33120579	-	CSTF3	0	0	0	0	0	0	0	0	0	YES
chr11	33790561	33792286	-	FBXO3	0	0	0	0	0	0	0	0	0	YES
chr11	36296323	36297686	-	COMMD9	0	0	0	0	0	0	0	0	-0.02	YES
chr11	43343687	43344979	+	API5	0	0	0	0	0	0	0	0	0	YES
chr11	43428766	43428902	+	TTC17	0	0	0	0	0	0	0	0	0	YES
chr11	43876415	43876693	+	HSD17B12	0	0	0	0	0	0	0	0	0	YES
chr11	43940687	43941467	+	ALKBH3	0	0	0	0	0	0	0	0	2.45333	YES
chr11	44639916	44640189	+	CD82	0	0	0	0	0	0	0	0	-0.443333	YES
chr11	46880867	46884156	-	LRP4	0	0	0	0	0	0	0	0	0	YES
chr11	46884299	46885998	-	LRP4	0	0	0	0	0	0	0	0	0.626667	YES
chr11	46886087	46886669	-	LRP4	0	0	0	0	0	0	0	0	-0.336667	YES
chr11	46886738	46889529	-	LRP4	0	0	0	0	0	0	0	0	-0.9	YES
chr11	46889666	46890150	-	LRP4	0	0	0	0	0	0	0	0	0	YES
chr11	46890684	46893075	-	LRP4	0	0	0	0	0	0	0	0	1.52667	YES
chr11	46893185	46894650	-	LRP4	0	0	0	0	0	0	0	0	-1.89667	YES
chr11	46894786	46894925	-	LRP4	0	0	0	0	0	0	0	0	1.38667	YES
chr11	46900590	46900676	-	LRP4	0	0	0	0	0	0	0	0	0	YES
chr11	46907724	46907875	-	LRP4	0	0	0	0	0	0	0	0	0	YES
chr11	46916843	46917434	-	LRP4	0	0	0	0	0	0	0	0	0	YES
chr11	47303305	47303931	+	MADD	0	0	0	0	0	0	0	0	-0.283333	YES
chr11	47311605	47311699	+	MADD	0	0	0	0	0	0	0	0	0.406667	YES
chr11	47345889	47346021	+	MADD	0	0	0	0	0	0	0	0	-0.306667	YES
chr11	48177427	48177536	+	PTPRJ	0	0	0	0	0	0	0	0	0	YES
chr11	57268329	57268460	-	SLC43A1	0	0	0	0	0	0	0	0	0	YES
chr11	58876186	58877012	+	FAM111B	0	0	0	0	0	0	0	0	0.65	YES
chr11	58958649	58959570	+	DTX4	0	0	0	0	0	0	0	0	0.456667	YES
chr11	59417084	59418226	-	PATL1	0	0	0	0	0	0	0	0	0	YES
chr11	59421546	59422995	-	PATL1	0	0	0	0	0	0	0	0	0	YES
chr11	61105603	61106537	+	DAK	0	0	0	0	0	0	0	0	0	YES
chr11	61110131	61110226	+	DAK	0	0	0	0	0	0	0	0	0	YES
chr11	61112839	61112933	+	DAK	0	0	0	0	0	0	0	0	-0.856667	YES
chr11	61113038	61113183	+	DAK	0	0	0	0	0	0	0	0	0	YES
chr11	61113218	61113328	+	DAK	0	0	0	0	0	0	0	0	0.206667	YES
chr11	61205321	61205475	+	SDHAF2	0	0	0	0	0	0	0	0	-0.0666667	YES
chr11	61507134	61507934	+	DAGLA	0	0	0	0	0	0	0	0	0	YES
chr11	61578352	61578445	-	FADS1	0	0	0	0	0	0	0	0	0.22	YES
chr11	61674943	61675036	-	RAB3IL1	0	0	0	0	0	0	0	0	0	YES
chr11	61675133	61675525	-	RAB3IL1	0	0	0	0	0	0	0	0	0	YES
chr11	61906243	61906359	+	INCENP	0	0	0	0	0	0	0	0	0.343333	YES
chr11	61908294	61908384	+	INCENP	0	0	0	0	0	0	0	0	-0.11	YES
chr11	62344490	62344653	-	TUT1	0	0	0	0	0	0	0	0	-1.99667	YES
chr11	62439338	62439424	+	C11orf83	0	0	0	0	0	0	0	0	-1.94667	YES
chr11	62458165	62458258	-	BSCL2	0	0	0	0	0	0	0	0	0.206667	YES
chr11	62489415	62489588	-	HNRNPUL2	0	0	0	0	0	0	0	0	-0.163333	YES
chr11	62530499	62532653	+	POLR2G	0	0	0	0	0	0	0	0	-0.44	YES
chr11	62553861	62553988	+	TAF6L	0	0	0	0	0	0	0	0	-0.226667	YES
chr11	62569519	62569648	-	NXF1	0	0	0	0	0	0	0	0	0	YES
chr11	62594698	62594814	-	STX5	0	0	0	0	0	0	0	0	0	YES
chr11	62638310	62639048	+	SLC3A2	0	0	0	0	0	0	0	0	0	YES
chr11	63666146	63666234	+	MARK2	0	0	0	0	0	0	0	0	0.503333	YES
chr11	63766345	63766426	-	MACROD1	0	0	0	0	0	0	0	0	7.19667	YES
chr11	63766877	63767001	-	MACROD1	0	0	0	0	0	0	0	0	-4.26	YES
chr11	63767033	63767113	-	MACROD1	0	0	0	0	0	0	0	0	-0.706667	YES
chr11	64001453	64001544	+	DNAJC4	0	0	0	0	0	0	0	0	-13.4567	YES
chr11	64031070	64031162	+	PLCB3	0	0	0	0	0	0	0	0	0.606667	YES
chr11	64122873	64123031	+	CCDC88B	0	0	0	0	0	0	0	0	-2.60333	YES
chr11	64126763	64126849	+	RPS6KA4	0	0	0	0	0	0	0	0	0.24	YES
chr11	64136074	64136175	+	RPS6KA4	0	0	0	0	0	0	0	0	0.213333	YES
chr11	64557258	64557360	-	MAP4K2	0	0	0	0	0	0	0	0	0.73	YES
chr11	64564026	64564105	-	MAP4K2	0	0	0	0	0	0	0	0	-0.546667	YES
chr11	64565137	64566265	-	MAP4K2	0	0	0	0	0	0	0	0	1.23333	YES
chr11	64569594	64569890	-	MAP4K2	0	0	0	0	0	0	0	0	-0.02	YES
chr11	64594871	64594998	-	CDC42BPG	0	0	0	0	0	0	0	0	-0.973333	YES
chr11	64599982	64600075	-	CDC42BPG	0	0	0	0	0	0	0	0	0	YES
chr11	64601309	64601396	-	CDC42BPG	0	0	0	0	0	0	0	0	0	YES
chr11	64609206	64609284	-	CDC42BPG	0	0	0	0	0	0	0	0	0	YES
chr11	64662682	64662761	-	ATG2A	0	0	0	0	0	0	0	0	1.75667	YES
chr11	64675137	64675219	-	ATG2A	0	0	0	0	0	0	0	0	0.103333	YES
chr11	64787972	64789192	+	ARL2	0	0	0	0	0	0	0	0	-0.06	YES
chr11	64854265	64854399	+	ZFPL1	0	0	0	0	0	0	0	0	0.39	YES
chr11	64974291	64975525	+	CAPN1	0	0	0	0	0	0	0	0	-0.146667	YES
chr11	64975592	64975675	+	CAPN1	0	0	0	0	0	0	0	0	-0.116667	YES
chr11	65307854	65307956	-	LTBP3	0	0	0	0	0	0	0	0	0.0266667	YES
chr11	65373324	65373416	-	MAP3K11	0	0	0	0	0	0	0	0	0	YES
chr11	65409849	65409933	+	SIPA1	0	0	0	0	0	0	0	0	0	YES
chr11	65413850	65413926	+	SIPA1	0	0	0	0	0	0	0	0	-0.3	YES
chr11	65417144	65417227	+	SIPA1	0	0	0	0	0	0	0	0	-0.306667	YES
chr11	65417337	65417420	+	SIPA1	0	0	0	0	0	0	0	0	0.706667	YES
chr11	65423234	65423325	-	RELA	0	0	0	0	0	0	0	0	0.0833333	YES
chr11	65484279	65484359	+	KAT5	0	0	0	0	0	0	0	0	0.853333	YES
chr11	66039932	66043274	+	RAB1B	0	0	0	0	0	0	0	0	0.0266667	YES
chr11	66100881	66100997	-	RIN1	0	0	0	0	0	0	0	0	0.546667	YES
chr11	66108342	66108437	-	BRMS1	0	0	0	0	0	0	0	0	-0.0766667	YES
chr11	66113712	66113960	-	B3GNT1	0	0	0	0	0	0	0	0	0.21	YES
chr11	66238843	66239839	+	PELI3	0	0	0	0	0	0	0	0	2.70667	YES
chr11	66239942	66240711	+	PELI3	0	0	0	0	0	0	0	0	5.01333	YES
chr11	66240907	66241207	+	PELI3	0	0	0	0	0	0	0	0	2.55	YES
chr11	66260382	66260537	+	DPP3	0	0	0	0	0	0	0	0	0	YES
chr11	66263222	66264768	+	DPP3	0	0	0	0	0	0	0	0	-0.09	YES
chr11	66331479	66331558	-	CTSF	0	0	0	0	0	0	0	0	0.363333	YES
chr11	66332478	66333141	-	CTSF	0	0	0	0	0	0	0	0	0.403333	YES
chr11	66333399	66333492	-	CTSF	0	0	0	0	0	0	0	0	-0.703333	YES
chr11	66372888	66372959	+	CCS	0	0	0	0	0	0	0	0	2.58667	YES
chr11	66455551	66455639	-	SPTBN2	0	0	0	0	0	0	0	0	0.356667	YES
chr11	66457415	66457509	-	SPTBN2	0	0	0	0	0	0	0	0	-0.423333	YES
chr11	66461333	66461609	-	SPTBN2	0	0	0	0	0	0	0	0	-0.42	YES
chr11	66488734	66488820	-	SPTBN2	0	0	0	0	0	0	0	0	0	YES
chr11	66616842	66617081	-	PC	0	0	0	0	0	0	0	0	0	YES
chr11	66620132	66620217	-	PC	0	0	0	0	0	0	0	0	0.803333	YES
chr11	67159550	67159631	+	RAD9A	0	0	0	0	0	0	0	0	-1.11667	YES
chr11	67234860	67234971	-	TMEM134	0	0	0	0	0	0	0	0	-0.74	YES
chr11	67261309	67261392	-	PITPNM1	0	0	0	0	0	0	0	0	13.0533	YES
chr11	67274969	67275062	-	CDK2AP2	0	0	0	0	0	0	0	0	-0.703333	YES
chr11	68853221	68853315	+	TPCN2	0	0	0	0	0	0	0	0	0.27	YES
chr11	70218497	70218582	+	PPFIA1	0	0	0	0	0	0	0	0	0.106667	YES
chr11	71799427	71800074	+	LRTOMT	0	0	0	0	0	0	0	0	1.14667	YES
chr11	72398784	72399499	-	ARAP1	0	0	0	0	0	0	0	0	0	YES
chr11	72406674	72406762	-	ARAP1	0	0	0	0	0	0	0	0	0.466667	YES
chr11	72554374	72554493	-	FCHSD2	0	0	0	0	0	0	0	0	2.21667	YES
chr11	73068180	73068286	+	ARHGEF17	0	0	0	0	0	0	0	0	0.51	YES
chr11	73075285	73075496	+	ARHGEF17	0	0	0	0	0	0	0	0	-1.44333	YES
chr11	73844018	73844469	-	C2CD3	0	0	0	0	0	0	0	0	-0.3	YES
chr11	74047800	74049512	-	PGM2L1	0	0	0	0	0	0	0	0	0	YES
chr11	74053696	74053929	-	PGM2L1	0	0	0	0	0	0	0	0	0	YES
chr11	74992187	74993005	-	ARRB1	0	0	0	0	0	0	0	0	0	YES
chr11	82561114	82561365	-	PRCP	0	0	0	0	0	0	0	0	0	YES
chr11	93486922	93487101	+	C11orf54	0	0	0	0	0	0	0	0	0.71	YES
chr11	93493025	93494680	+	C11orf54	0	0	0	0	0	0	0	0	0	YES
chr11	103114521	103115979	+	DYNC2H1	0	0	0	0	0	0	0	0	0	YES
chr11	104899995	104900391	-	CASP1	0	0	0	0	0	0	0	0	0	YES
chr11	104900627	104901056	-	CASP1	0	0	0	0	0	0	0	0	0	YES
chr11	108235946	108236051	+	ATM	0	0	0	0	0	0	0	0	0.0766667	YES
chr11	111864465	111865742	+	DIXDC1	0	0	0	0	0	0	0	0	-0.483333	YES
chr11	113230184	113230661	+	TTC12	0	0	0	0	0	0	0	0	0.306667	YES
chr11	113694423	113697954	-	USP28	0	0	0	0	0	0	0	0	0	YES
chr11	116629124	116629789	-	BUD13	0	0	0	0	0	0	0	0	0.0366667	YES
chr11	117061006	117061338	+	SIDT2	0	0	0	0	0	0	0	0	-1.33333	YES
chr11	117063079	117063289	+	SIDT2	0	0	0	0	0	0	0	0	0.563333	YES
chr11	117150721	117150886	+	RNF214	0	0	0	0	0	0	0	0	0	YES
chr11	117152121	117152315	+	RNF214	0	0	0	0	0	0	0	0	0	YES
chr11	117161376	117161615	-	BACE1	0	0	0	0	0	0	0	0	-3.12	YES
chr11	117161766	117162427	-	BACE1	0	0	0	0	0	0	0	0	-6.92333	YES
chr11	117232710	117233119	+	CEP164	0	0	0	0	0	0	0	0	0	YES
chr11	117261625	117261714	+	CEP164	0	0	0	0	0	0	0	0	-0.906667	YES
chr11	118244004	118244208	+	UBE4A	0	0	0	0	0	0	0	0	0.216667	YES
chr11	118255451	118255546	+	UBE4A	0	0	0	0	0	0	0	0	0.406667	YES
chr11	118422568	118422928	-	IFT46	0	0	0	0	0	0	0	0	-0.0466667	YES
chr11	118425303	118425704	-	IFT46	0	0	0	0	0	0	0	0	0	YES
chr11	118425799	118425962	-	IFT46	0	0	0	0	0	0	0	0	0.583333	YES
chr11	118484612	118485273	+	PHLDB1	0	0	0	0	0	0	0	0	0	YES
chr11	118516369	118516452	+	PHLDB1	0	0	0	0	0	0	0	0	-0.793333	YES
chr11	118889681	118889852	+	TRAPPC4	0	0	0	0	0	0	0	0	0.0866667	YES
chr11	118916544	118917128	-	HYOU1	0	0	0	0	0	0	0	0	0	YES
chr11	118924949	118925205	-	HYOU1	0	0	0	0	0	0	0	0	0	YES
chr11	118983320	118983409	+	C2CD2L	0	0	0	0	0	0	0	0	-0.606667	YES
chr11	119003492	119003573	+	HINFP	0	0	0	0	0	0	0	0	0.03	YES
chr11	119043135	119043609	+	NLRX1	0	0	0	0	0	0	0	0	0	YES
chr11	119547930	119548264	-	PVRL1	0	0	0	0	0	0	0	0	-0.433333	YES
chr11	121424819	121425895	+	SORL1	0	0	0	0	0	0	0	0	0	YES
chr11	121460884	121461709	+	SORL1	0	0	0	0	0	0	0	0	0	YES
chr11	121475949	121476110	+	SORL1	0	0	0	0	0	0	0	0	0	YES
chr11	121481868	121483444	+	SORL1	0	0	0	0	0	0	0	0	0	YES
chr11	121490627	121491772	+	SORL1	0	0	0	0	0	0	0	0	0	YES
chr11	122678885	122680456	+	UBASH3B	0	0	0	0	0	0	0	0	0.243333	YES
chr11	124507099	124508437	-	SIAE	0	0	0	0	0	0	0	0	-0.176667	YES
chr11	124508634	124509605	-	SIAE	0	0	0	0	0	0	0	0	0.38	YES
chr11	125503247	125505323	+	CHEK1	0	0	0	0	0	0	0	0	0	YES
chr11	125864285	125864765	-	CDON	0	0	0	0	0	0	0	0	1.45	YES
chr11	126160481	126160697	+	TIRAP	0	0	0	0	0	0	0	0	2.14333	YES
chr11	134119815	134120168	-	THYN1	0	0	0	0	0	0	0	0	-0.293333	YES
chr11	134131074	134131168	+	ACAD8	0	0	0	0	0	0	0	0	0.323333	YES
chr12	549909	550009	+	CCDC77	0	0	0	0	0	0	0	0	0.793333	YES
chr12	644436	645383	+	B4GALNT3	0	0	0	0	0	0	0	0	0	YES
chr12	674568	675115	-	NINJ2	0	0	0	0	0	0	0	0	-1.09	YES
chr12	3390496	3390899	+	TSPAN9	0	0	0	0	0	0	0	0	2.02	YES
chr12	4634542	4634649	-	C12orf4	0	0	0	0	0	0	0	0	0	YES
chr12	4763629	4763990	+	NDUFA9	0	0	0	0	0	0	0	0	0	YES
chr12	6690555	6690814	-	CHD4	0	0	0	0	0	0	0	0	-0.0966667	YES
chr12	6704597	6705171	-	CHD4	0	0	0	0	0	0	0	0	0.07	YES
chr12	7064431	7064534	+	PTPN6	0	0	0	0	0	0	0	0	0	YES
chr12	7069403	7069506	+	PTPN6	0	0	0	0	0	0	0	0	-1.3	YES
chr12	7070109	7070288	+	PTPN6	0	0	0	0	0	0	0	0	-2.71667	YES
chr12	7086054	7086295	-	LPCAT3	0	0	0	0	0	0	0	0	-2.72667	YES
chr12	7086425	7086528	-	LPCAT3	0	0	0	0	0	0	0	0	-1.27	YES
chr12	7171697	7172403	+	C1S	0	0	0	0	0	0	0	0	0	YES
chr12	7172604	7173120	+	C1S	0	0	0	0	0	0	0	0	-0.0733333	YES
chr12	7174422	7174946	+	C1S	0	0	0	0	0	0	0	0	-1.60667	YES
chr12	7175076	7175759	+	C1S	0	0	0	0	0	0	0	0	0	YES
chr12	7175835	7177158	+	C1S	0	0	0	0	0	0	0	0	0	YES
chr12	7188606	7189335	-	C1R	0	0	0	0	0	0	0	0	0	YES
chr12	7241328	7241434	-	C1R	0	0	0	0	0	0	0	0	0	YES
chr12	7242086	7242182	-	C1R	0	0	0	0	0	0	0	0	0	YES
chr12	7242330	7242651	-	C1R	0	0	0	0	0	0	0	0	0	YES
chr12	7244277	7244982	-	C1R	0	0	0	0	0	0	0	0	0.593333	YES
chr12	7355301	7356027	+	PEX5	0	0	0	0	0	0	0	0	-0.26	YES
chr12	8196688	8197355	+	FOXJ2	0	0	0	0	0	0	0	0	0	YES
chr12	9220821	9221335	-	A2M	0	0	0	0	0	0	0	0	-2.74	YES
chr12	9221439	9222340	-	A2M	0	0	0	0	0	0	0	0	0	YES
chr12	9225083	9225248	-	A2M	0	0	0	0	0	0	0	0	0	YES
chr12	9225468	9227155	-	A2M	0	0	0	0	0	0	0	0	-0.776667	YES
chr12	9229533	9229941	-	A2M	0	0	0	0	0	0	0	0	0	YES
chr12	9230454	9231839	-	A2M	0	0	0	0	0	0	0	0	0	YES
chr12	9231928	9232234	-	A2M	0	0	0	0	0	0	0	0	0	YES
chr12	9232412	9232689	-	A2M	0	0	0	0	0	0	0	0	0	YES
chr12	9241848	9242497	-	A2M	0	0	0	0	0	0	0	0	0	YES
chr12	9242620	9242951	-	A2M	0	0	0	0	0	0	0	0	0	YES
chr12	9244026	9246060	-	A2M	0	0	0	0	0	0	0	0	0.306667	YES
chr12	9246176	9247568	-	A2M	0	0	0	0	0	0	0	0	0	YES
chr12	9248297	9251202	-	A2M	0	0	0	0	0	0	0	0	-0.566667	YES
chr12	9253804	9254042	-	A2M	0	0	0	0	0	0	0	0	-0.63	YES
chr12	9258942	9259086	-	A2M	0	0	0	0	0	0	0	0	0	YES
chr12	9260241	9261916	-	A2M	0	0	0	0	0	0	0	0	0	YES
chr12	9262632	9262909	-	A2M	0	0	0	0	0	0	0	0	0	YES
chr12	9264808	9264972	-	A2M	0	0	0	0	0	0	0	0	0	YES
chr12	9265133	9265955	-	A2M	0	0	0	0	0	0	0	0	0	YES
chr12	9302199	9303239	-	PZP	0	0	0	0	0	0	0	0	2.66667	YES
chr12	9304907	9305419	-	PZP	0	0	0	0	0	0	0	0	0	YES
chr12	9305548	9305720	-	PZP	0	0	0	0	0	0	0	0	-1.80333	YES
chr12	9344853	9345107	-	PZP	0	0	0	0	0	0	0	0	0	YES
chr12	12277597	12278229	-	LRP6	0	0	0	0	0	0	0	0	0	YES
chr12	13140267	13142210	-	HEBP1	0	0	0	0	0	0	0	0	0.0633333	YES
chr12	13366510	13366614	+	EMP1	0	0	0	0	0	0	0	0	-0.143333	YES
chr12	15035215	15035905	-	MGP	0	0	0	0	0	0	0	0	0	YES
chr12	15035982	15037146	-	MGP	0	0	0	0	0	0	0	0	0	YES
chr12	15100884	15102735	-	ARHGDIB	0	0	0	0	0	0	0	0	0	YES
chr12	15811088	15811430	-	EPS8	0	0	0	0	0	0	0	0	0	YES
chr12	21623281	21623902	-	RECQL	0	0	0	0	0	0	0	0	-0.96	YES
chr12	22678640	22680654	-	KIAA0528	0	0	0	0	0	0	0	0	0	YES
chr12	25356942	25357024	+	LYRM5	0	0	0	0	0	0	0	0	-0.196667	YES
chr12	26277113	26277451	-	BHLHE41	0	0	0	0	0	0	0	0	0	YES
chr12	26492417	26493099	-	ITPR2	0	0	0	0	0	0	0	0	0	YES
chr12	27109594	27110533	+	FGFR1OP2	0	0	0	0	0	0	0	0	-0.35	YES
chr12	27179468	27180279	+	MED21	0	0	0	0	0	0	0	0	0.276667	YES
chr12	27180381	27181217	+	MED21	0	0	0	0	0	0	0	0	0.116667	YES
chr12	27553708	27554189	+	ARNTL2	0	0	0	0	0	0	0	0	-0.2	YES
chr12	27554297	27554456	+	ARNTL2	0	0	0	0	0	0	0	0	0	YES
chr12	27568881	27571020	+	ARNTL2	0	0	0	0	0	0	0	0	-0.323333	YES
chr12	27834630	27835319	+	PPFIBP1	0	0	0	0	0	0	0	0	-0.316667	YES
chr12	27841357	27841947	+	PPFIBP1	0	0	0	0	0	0	0	0	0	YES
chr12	27844862	27845523	+	PPFIBP1	0	0	0	0	0	0	0	0	0	YES
chr12	31850352	31850673	-	AMN1	0	0	0	0	0	0	0	0	0	YES
chr12	32975566	32976978	-	PKP2	0	0	0	0	0	0	0	0	0	YES
chr12	39763714	39763840	-	KIF21A	0	0	0	0	0	0	0	0	0	YES
chr12	40158415	40158538	-	SLC2A13	0	0	0	0	0	0	0	0	0	YES
chr12	41323805	41327262	+	CNTN1	0	0	0	0	0	0	0	0	0	YES
chr12	41327363	41327498	+	CNTN1	0	0	0	0	0	0	0	0	0	YES
chr12	41337527	41337796	+	CNTN1	0	0	0	0	0	0	0	0	0	YES
chr12	41419139	41421658	+	CNTN1	0	0	0	0	0	0	0	0	0	YES
chr12	42711250	42711588	-	ZCRB1	0	0	0	0	0	0	0	0	0	YES
chr12	44166166	44166714	+	IRAK4	0	0	0	0	0	0	0	0	-0.68	YES
chr12	44180361	44180482	+	IRAK4	0	0	0	0	0	0	0	0	0	YES
chr12	45001048	45004630	-	NELL2	0	0	0	0	0	0	0	0	0	YES
chr12	45168633	45169804	-	NELL2	0	0	0	0	0	0	0	0	0	YES
chr12	45170908	45171024	-	NELL2	0	0	0	0	0	0	0	0	-0.98	YES
chr12	45742099	45742300	+	ANO6	0	0	0	0	0	0	0	0	0	YES
chr12	48535611	48535696	+	PFKM	0	0	0	0	0	0	0	0	0.77	YES
chr12	49219027	49219216	+	CACNB3	0	0	0	0	0	0	0	0	-0.466667	YES
chr12	49397706	49398289	-	PRKAG1	0	0	0	0	0	0	0	0	0.03	YES
chr12	49433401	49433506	-	MLL2	0	0	0	0	0	0	0	0	-0.216667	YES
chr12	49496160	49496250	-	LMBR1L	0	0	0	0	0	0	0	0	0	YES
chr12	49496324	49496669	-	LMBR1L	0	0	0	0	0	0	0	0	1.23333	YES
chr12	49579774	49580092	-	TUBA1A	0	0	0	0	0	0	0	0	0.463333	YES
chr12	50037788	50037882	+	PRPF40B	0	0	0	0	0	0	0	0	2.48	YES
chr12	50047658	50047974	-	FMNL3	0	0	0	0	0	0	0	0	-0.563333	YES
chr12	50048768	50050186	-	FMNL3	0	0	0	0	0	0	0	0	0	YES
chr12	50385917	50386027	-	RACGAP1	0	0	0	0	0	0	0	0	-0.0433333	YES
chr12	52702049	52702187	+	KRT86	0	0	0	0	0	0	0	0	-4.38	YES
chr12	53552469	53553406	-	CSAD	0	0	0	0	0	0	0	0	-0.63	YES
chr12	53553497	53553670	-	CSAD	0	0	0	0	0	0	0	0	-0.456667	YES
chr12	53553723	53553903	-	CSAD	0	0	0	0	0	0	0	0	0.186667	YES
chr12	53554104	53554546	-	CSAD	0	0	0	0	0	0	0	0	1.47	YES
chr12	53563911	53564206	-	CSAD	0	0	0	0	0	0	0	0	-2.54	YES
chr12	53565773	53566129	-	CSAD	0	0	0	0	0	0	0	0	1.19	YES
chr12	53566221	53566305	-	CSAD	0	0	0	0	0	0	0	0	-2.19	YES
chr12	53566433	53567128	-	CSAD	0	0	0	0	0	0	0	0	-3.90667	YES
chr12	53567261	53567511	-	CSAD	0	0	0	0	0	0	0	0	2.04	YES
chr12	53700646	53700749	+	C12orf10	0	0	0	0	0	0	0	0	-2.39	YES
chr12	53701918	53702065	-	AAAS	0	0	0	0	0	0	0	0	0.0233333	YES
chr12	53702805	53702940	-	AAAS	0	0	0	0	0	0	0	0	0	YES
chr12	53917169	53918347	-	ATF7	0	0	0	0	0	0	0	0	0.513333	YES
chr12	54106991	54107484	-	CALCOCO1	0	0	0	0	0	0	0	0	0.306667	YES
chr12	54764271	54764409	-	ZNF385A	0	0	0	0	0	0	0	0	-1.01333	YES
chr12	54764506	54764710	-	ZNF385A	0	0	0	0	0	0	0	0	-0.383333	YES
chr12	54764881	54765256	-	ZNF385A	0	0	0	0	0	0	0	0	-0.743333	YES
chr12	54765500	54767756	-	ZNF385A	0	0	0	0	0	0	0	0	-1.2	YES
chr12	54767920	54769627	-	ZNF385A	0	0	0	0	0	0	0	0	0	YES
chr12	54790161	54791148	-	ITGA5	0	0	0	0	0	0	0	0	0	YES
chr12	54791272	54792380	-	ITGA5	0	0	0	0	0	0	0	0	0	YES
chr12	54792483	54793428	-	ITGA5	0	0	0	0	0	0	0	0	0	YES
chr12	54793543	54793647	-	ITGA5	0	0	0	0	0	0	0	0	0.0633333	YES
chr12	54793732	54794629	-	ITGA5	0	0	0	0	0	0	0	0	0.54	YES
chr12	54794780	54795156	-	ITGA5	0	0	0	0	0	0	0	0	0.23	YES
chr12	54795263	54795368	-	ITGA5	0	0	0	0	0	0	0	0	-0.486667	YES
chr12	54795450	54795559	-	ITGA5	0	0	0	0	0	0	0	0	-1.10667	YES
chr12	54795640	54795784	-	ITGA5	0	0	0	0	0	0	0	0	0	YES
chr12	54795878	54795963	-	ITGA5	0	0	0	0	0	0	0	0	-0.233333	YES
chr12	54796115	54796766	-	ITGA5	0	0	0	0	0	0	0	0	-0.53	YES
chr12	54796835	54796970	-	ITGA5	0	0	0	0	0	0	0	0	-0.383333	YES
chr12	54797109	54797408	-	ITGA5	0	0	0	0	0	0	0	0	0	YES
chr12	54797564	54797694	-	ITGA5	0	0	0	0	0	0	0	0	-0.393333	YES
chr12	54797751	54797928	-	ITGA5	0	0	0	0	0	0	0	0	0.243333	YES
chr12	54798031	54798213	-	ITGA5	0	0	0	0	0	0	0	0	-0.306667	YES
chr12	54798260	54798486	-	ITGA5	0	0	0	0	0	0	0	0	-1.01	YES
chr12	54798679	54798949	-	ITGA5	0	0	0	0	0	0	0	0	0.613333	YES
chr12	54799159	54799447	-	ITGA5	0	0	0	0	0	0	0	0	0	YES
chr12	54799501	54799653	-	ITGA5	0	0	0	0	0	0	0	0	-0.47	YES
chr12	54799711	54801432	-	ITGA5	0	0	0	0	0	0	0	0	0.383333	YES
chr12	54801477	54801615	-	ITGA5	0	0	0	0	0	0	0	0	0	YES
chr12	54801661	54801893	-	ITGA5	0	0	0	0	0	0	0	0	0	YES
chr12	54802020	54802539	-	ITGA5	0	0	0	0	0	0	0	0	-0.983333	YES
chr12	54802586	54802676	-	ITGA5	0	0	0	0	0	0	0	0	-0.0266667	YES
chr12	54802739	54803015	-	ITGA5	0	0	0	0	0	0	0	0	-0.53	YES
chr12	54803137	54803268	-	ITGA5	0	0	0	0	0	0	0	0	0.163333	YES
chr12	54803382	54805617	-	ITGA5	0	0	0	0	0	0	0	0	0	YES
chr12	54805749	54812764	-	ITGA5	0	0	0	0	0	0	0	0	0	YES
chr12	56383883	56384465	+	RAB5B	0	0	0	0	0	0	0	0	0.196667	YES
chr12	56482441	56482531	+	ERBB3	0	0	0	0	0	0	0	0	-0.886667	YES
chr12	56486605	56486769	+	ERBB3	0	0	0	0	0	0	0	0	0	YES
chr12	56492360	56492542	+	ERBB3	0	0	0	0	0	0	0	0	3.04333	YES
chr12	56493530	56493621	+	ERBB3	0	0	0	0	0	0	0	0	2.30333	YES
chr12	56493814	56493957	+	ERBB3	0	0	0	0	0	0	0	0	-0.813333	YES
chr12	56495146	56495312	+	ERBB3	0	0	0	0	0	0	0	0	-3.17	YES
chr12	56527459	56527564	+	ESYT1	0	0	0	0	0	0	0	0	0.0666667	YES
chr12	56566814	56567479	-	SMARCC2	0	0	0	0	0	0	0	0	3.40333	YES
chr12	56619296	56619407	+	OBFC2B	0	0	0	0	0	0	0	0	0	YES
chr12	56638582	56638689	-	ANKRD52	0	0	0	0	0	0	0	0	0.533333	YES
chr12	56638774	56638886	-	ANKRD52	0	0	0	0	0	0	0	0	-0.413333	YES
chr12	56645880	56645958	-	ANKRD52	0	0	0	0	0	0	0	0	0.236667	YES
chr12	56663346	56663933	+	COQ10A	0	0	0	0	0	0	0	0	0.8	YES
chr12	56713549	56713647	-	PAN2	0	0	0	0	0	0	0	0	1.89	YES
chr12	56717169	56717283	-	PAN2	0	0	0	0	0	0	0	0	0	YES
chr12	56719239	56720096	-	PAN2	0	0	0	0	0	0	0	0	0	YES
chr12	56737920	56739929	-	STAT2	0	0	0	0	0	0	0	0	0	YES
chr12	57132310	57133077	-	PRIM1	0	0	0	0	0	0	0	0	-0.146667	YES
chr12	57139966	57140564	-	PRIM1	0	0	0	0	0	0	0	0	0	YES
chr12	57662866	57663105	-	R3HDM2	0	0	0	0	0	0	0	0	-0.656667	YES
chr12	58007143	58007222	+	ARHGEF25	0	0	0	0	0	0	0	0	0	YES
chr12	58009801	58010066	+	ARHGEF25	0	0	0	0	0	0	0	0	0.583333	YES
chr12	58017697	58017785	+	SLC26A10	0	0	0	0	0	0	0	0	0	YES
chr12	58018766	58018905	+	SLC26A10	0	0	0	0	0	0	0	0	-4.93667	YES
chr12	58018940	58019018	+	SLC26A10	0	0	0	0	0	0	0	0	-0.71	YES
chr12	58019248	58019364	+	SLC26A10	0	0	0	0	0	0	0	0	0.716667	YES
chr12	58089627	58089744	+	OS9	0	0	0	0	0	0	0	0	0.23	YES
chr12	58110528	58111652	+	OS9	0	0	0	0	0	0	0	0	0	YES
chr12	58114302	58114566	+	OS9	0	0	0	0	0	0	0	0	-0.12	YES
chr12	58121013	58121142	-	AGAP2	0	0	0	0	0	0	0	0	0	YES
chr12	58121366	58121463	-	AGAP2	0	0	0	0	0	0	0	0	0	YES
chr12	58121555	58121719	-	AGAP2	0	0	0	0	0	0	0	0	0.74	YES
chr12	62783480	62783576	+	USP15	0	0	0	0	0	0	0	0	0.03	YES
chr12	62932106	62932194	+	MON2	0	0	0	0	0	0	0	0	0	YES
chr12	65639720	65639941	+	LEMD3	0	0	0	0	0	0	0	0	0	YES
chr12	72090354	72091059	+	TMEM19	0	0	0	0	0	0	0	0	0.393333	YES
chr12	75874835	75875613	+	GLIPR1	0	0	0	0	0	0	0	0	0	YES
chr12	75884299	75889356	+	GLIPR1	0	0	0	0	0	0	0	0	-24.2267	YES
chr12	76780047	76780358	-	OSBPL8	0	0	0	0	0	0	0	0	0	YES
chr12	80084172	80084651	-	PAWR	0	0	0	0	0	0	0	0	-5.80333	YES
chr12	80169796	80172329	-	PPP1R12A	0	0	0	0	0	0	0	0	0.15	YES
chr12	88436698	88437375	+	C12orf29	0	0	0	0	0	0	0	0	0.0966667	YES
chr12	88500683	88500772	-	CEP290	0	0	0	0	0	0	0	0	1.23333	YES
chr12	88505129	88505470	-	CEP290	0	0	0	0	0	0	0	0	0.853333	YES
chr12	88514054	88514773	-	CEP290	0	0	0	0	0	0	0	0	0	YES
chr12	88554007	88554455	+	TMTC3	0	0	0	0	0	0	0	0	0	YES
chr12	96359558	96360125	+	AMDHD1	0	0	0	0	0	0	0	0	1.45	YES
chr12	99117091	99117416	+	APAF1	0	0	0	0	0	0	0	0	0	YES
chr12	100451525	100451806	-	UHRF1BP1L	0	0	0	0	0	0	0	0	0	YES
chr12	101679660	101680098	+	UTP20	0	0	0	0	0	0	0	0	0	YES
chr12	101685667	101685747	+	UTP20	0	0	0	0	0	0	0	0	-0.18	YES
chr12	101736616	101736718	+	UTP20	0	0	0	0	0	0	0	0	0	YES
chr12	101745973	101746824	+	UTP20	0	0	0	0	0	0	0	0	-0.0733333	YES
chr12	101763670	101764209	+	UTP20	0	0	0	0	0	0	0	0	-0.23	YES
chr12	102117105	102117499	+	CHPT1	0	0	0	0	0	0	0	0	0	YES
chr12	102151089	102151349	-	GNPTAB	0	0	0	0	0	0	0	0	0	YES
chr12	102590480	102590750	-	PMCH	0	0	0	0	0	0	0	0	-0.733333	YES
chr12	104476385	104476490	+	HCFC2	0	0	0	0	0	0	0	0	0	YES
chr12	104480793	104481763	+	HCFC2	0	0	0	0	0	0	0	0	0	YES
chr12	105589128	105589222	-	APPL2	0	0	0	0	0	0	0	0	-0.98	YES
chr12	105589280	105589362	-	APPL2	0	0	0	0	0	0	0	0	-0.483333	YES
chr12	105600986	105601748	-	APPL2	0	0	0	0	0	0	0	0	0	YES
chr12	106760351	106760435	+	POLR3B	0	0	0	0	0	0	0	0	0	YES
chr12	107391165	107391265	-	CRY1	0	0	0	0	0	0	0	0	0	YES
chr12	109540733	109541237	+	UNG	0	0	0	0	0	0	0	0	-0.04	YES
chr12	109703086	109703193	+	ACACB	0	0	0	0	0	0	0	0	0.71	YES
chr12	110006669	110009453	-	MMAB	0	0	0	0	0	0	0	0	0.01	YES
chr12	110011679	110012613	+	MVK	0	0	0	0	0	0	0	0	0	YES
chr12	110572819	110573131	+	IFT81	0	0	0	0	0	0	0	0	-0.15	YES
chr12	110893488	110893619	-	GPN3	0	0	0	0	0	0	0	0	-0.18	YES
chr12	110924260	110924338	+	C12orf24	0	0	0	0	0	0	0	0	0.296667	YES
chr12	111078955	111079346	+	TCTN1	0	0	0	0	0	0	0	0	-0.616667	YES
chr12	111885349	111885459	+	SH2B3	0	0	0	0	0	0	0	0	0	YES
chr12	112140115	112143541	+	ACAD10	0	0	0	0	0	0	0	0	-0.606667	YES
chr12	112171873	112174634	+	ACAD10	0	0	0	0	0	0	0	0	0	YES
chr12	112184991	112185098	+	ACAD10	0	0	0	0	0	0	0	0	0	YES
chr12	112221103	112223070	+	ALDH2	0	0	0	0	0	0	0	0	0	YES
chr12	112227739	112228237	+	ALDH2	0	0	0	0	0	0	0	0	0	YES
chr12	112572678	112572816	+	TRAFD1	0	0	0	0	0	0	0	0	0	YES
chr12	112614507	112616734	-	C12orf51	0	0	0	0	0	0	0	0	0	YES
chr12	112616887	112616977	-	C12orf51	0	0	0	0	0	0	0	0	0.0366667	YES
chr12	113384787	113385750	+	OAS3	0	0	0	0	0	0	0	0	0	YES
chr12	113405399	113405740	+	OAS3	0	0	0	0	0	0	0	0	-0.31	YES
chr12	113407561	113407766	+	OAS3	0	0	0	0	0	0	0	0	-0.423333	YES
chr12	113603523	113603606	-	DDX54	0	0	0	0	0	0	0	0	0.05	YES
chr12	113614741	113614856	-	DDX54	0	0	0	0	0	0	0	0	0	YES
chr12	113722443	113722522	+	TPCN1	0	0	0	0	0	0	0	0	0.926667	YES
chr12	113812380	113812597	+	PLBD2	0	0	0	0	0	0	0	0	0	YES
chr12	113873362	113874555	+	SDSL	0	0	0	0	0	0	0	0	0	YES
chr12	117484472	117484581	-	TESC	0	0	0	0	0	0	0	0	-7.77667	YES
chr12	117610413	117612009	-	FBXO21	0	0	0	0	0	0	0	0	0	YES
chr12	120117807	120118052	+	PRKAB1	0	0	0	0	0	0	0	0	0.88	YES
chr12	120139558	120139654	-	CIT	0	0	0	0	0	0	0	0	-0.586667	YES
chr12	120941689	120941772	-	COQ5	0	0	0	0	0	0	0	0	-0.603333	YES
chr12	121019061	121019145	-	POP5	0	0	0	0	0	0	0	0	0.65	YES
chr12	121448730	121448906	-	C12orf43	0	0	0	0	0	0	0	0	-0.13	YES
chr12	121690518	121691075	-	CAMKK2	0	0	0	0	0	0	0	0	0	YES
chr12	122723272	122724424	-	VPS33A	0	0	0	0	0	0	0	0	0.29	YES
chr12	122734593	122735529	-	VPS33A	0	0	0	0	0	0	0	0	2.72	YES
chr12	122748247	122748680	-	VPS33A	0	0	0	0	0	0	0	0	0	YES
chr12	122817691	122818573	-	CLIP1	0	0	0	0	0	0	0	0	0	YES
chr12	123036071	123036167	+	KNTC1	0	0	0	0	0	0	0	0	0	YES
chr12	123055480	123055571	+	KNTC1	0	0	0	0	0	0	0	0	0	YES
chr12	123087791	123089110	+	KNTC1	0	0	0	0	0	0	0	0	0	YES
chr12	123098309	123099537	+	KNTC1	0	0	0	0	0	0	0	0	0	YES
chr12	123099634	123100016	+	KNTC1	0	0	0	0	0	0	0	0	0	YES
chr12	123107155	123109144	+	KNTC1	0	0	0	0	0	0	0	0	0	YES
chr12	123333156	123333342	+	HIP1R	0	0	0	0	0	0	0	0	0.63	YES
chr12	123339510	123339599	+	HIP1R	0	0	0	0	0	0	0	0	-0.546667	YES
chr12	123340892	123340978	+	HIP1R	0	0	0	0	0	0	0	0	0.47	YES
chr12	123345740	123345854	+	HIP1R	0	0	0	0	0	0	0	0	-0.84	YES
chr12	124181746	124184250	+	TCTN2	0	0	0	0	0	0	0	0	0	YES
chr12	124819827	124820028	-	NCOR2	0	0	0	0	0	0	0	0	0	YES
chr12	132393363	132393442	+	ULK1	0	0	0	0	0	0	0	0	0.756667	YES
chr12	132399777	132399879	+	ULK1	0	0	0	0	0	0	0	0	0.246667	YES
chr12	132529499	132529863	+	EP400	0	0	0	0	0	0	0	0	0	YES
chr12	132539565	132539643	+	EP400	0	0	0	0	0	0	0	0	0.513333	YES
chr12	132636190	132636282	+	NOC4L	0	0	0	0	0	0	0	0	0.02	YES
chr12	132636743	132636826	+	NOC4L	0	0	0	0	0	0	0	0	0.12	YES
chr12	133435814	133438052	-	CHFR	0	0	0	0	0	0	0	0	0	YES
chr13	20978382	20978773	-	CRYL1	0	0	0	0	0	0	0	0	-1.01	YES
chr13	21212658	21215428	+	IFT88	0	0	0	0	0	0	0	0	-0.47	YES
chr13	21721067	21721324	+	SAP18	0	0	0	0	0	0	0	0	-0.0433333	YES
chr13	22095467	22096741	-	EFHA1	0	0	0	0	0	0	0	0	0	YES
chr13	24190185	24200845	+	TNFRSF19	0	0	0	0	0	0	0	0	0	YES
chr13	25030617	25033181	-	PARP4	0	0	0	0	0	0	0	0	0	YES
chr13	28004104	28004669	+	GTF3A	0	0	0	0	0	0	0	0	-0.316667	YES
chr13	28010031	28011252	-	MTIF3	0	0	0	0	0	0	0	0	0.363333	YES
chr13	31821237	31821991	+	B3GALTL	0	0	0	0	0	0	0	0	0	YES
chr13	32944695	32945092	+	BRCA2	0	0	0	0	0	0	0	0	-1.07667	YES
chr13	32954051	32954143	+	BRCA2	0	0	0	0	0	0	0	0	-1.58667	YES
chr13	32971182	32972298	+	BRCA2	0	0	0	0	0	0	0	0	0	YES
chr13	37012013	37012203	+	CCNA1	0	0	0	0	0	0	0	0	0.75	YES
chr13	37012329	37012780	+	CCNA1	0	0	0	0	0	0	0	0	-0.583333	YES
chr13	37013005	37014115	+	CCNA1	0	0	0	0	0	0	0	0	0	YES
chr13	37014321	37015254	+	CCNA1	0	0	0	0	0	0	0	0	-0.423333	YES
chr13	37016442	37016750	+	CCNA1	0	0	0	0	0	0	0	0	0.546667	YES
chr13	37576689	37577070	+	EXOSC8	0	0	0	0	0	0	0	0	0.02	YES
chr13	37614596	37614712	-	FAM48A	0	0	0	0	0	0	0	0	0	YES
chr13	40293505	40293796	+	COG6	0	0	0	0	0	0	0	0	0	YES
chr13	41639215	41639299	+	WBP4	0	0	0	0	0	0	0	0	0	YES
chr13	42439950	42440037	-	KIAA0564	0	0	0	0	0	0	0	0	0	YES
chr13	42860172	42860435	+	AKAP11	0	0	0	0	0	0	0	0	0	YES
chr13	43896638	43900554	-	ENOX1	0	0	0	0	0	0	0	0	0	YES
chr13	45973214	45975217	-	SLC25A30	0	0	0	0	0	0	0	0	0.0533333	YES
chr13	46544107	46544496	-	ZC3H13	0	0	0	0	0	0	0	0	0.346667	YES
chr13	48954221	48954300	+	RB1	0	0	0	0	0	0	0	0	0.143333	YES
chr13	49087032	49089340	-	RCBTB2	0	0	0	0	0	0	0	0	1.23333	YES
chr13	49951268	49956935	-	CAB39L	0	0	0	0	0	0	0	0	0	YES
chr13	50098353	50100522	+	PHF11	0	0	0	0	0	0	0	0	-0.47	YES
chr13	50280306	50280403	-	KPNA3	0	0	0	0	0	0	0	0	-0.06	YES
chr13	50656694	50678839	+	DLEU1	0	0	0	0	0	0	0	0	-0.833333	YES
chr13	52707363	52707824	-	NEK3	0	0	0	0	0	0	0	0	0	YES
chr13	52710396	52710935	-	NEK3	0	0	0	0	0	0	0	0	-1.15	YES
chr13	52726828	52728029	-	NEK3	0	0	0	0	0	0	0	0	0	YES
chr13	52728128	52728214	-	NEK3	0	0	0	0	0	0	0	0	0	YES
chr13	73335953	73336060	-	DIS3	0	0	0	0	0	0	0	0	0.00333333	YES
chr13	76111812	76111899	-	COMMD6	0	0	0	0	0	0	0	0	0.216667	YES
chr13	76140988	76141362	+	UCHL3	0	0	0	0	0	0	0	0	0	YES
chr13	77635437	77635796	-	MYCBP2	0	0	0	0	0	0	0	0	0	YES
chr13	77844199	77844430	-	MYCBP2	0	0	0	0	0	0	0	0	0	YES
chr13	95815902	95816631	-	ABCC4	0	0	0	0	0	0	0	0	0	YES
chr13	95861852	95862945	-	ABCC4	0	0	0	0	0	0	0	0	-0.606667	YES
chr13	95899350	95899896	-	ABCC4	0	0	0	0	0	0	0	0	0	YES
chr13	96589343	96592210	-	UGGT2	0	0	0	0	0	0	0	0	0	YES
chr13	99092298	99092376	+	FARP1	0	0	0	0	0	0	0	0	1.09	YES
chr13	99481777	99481896	-	DOCK9	0	0	0	0	0	0	0	0	0	YES
chr13	99520266	99520484	-	DOCK9	0	0	0	0	0	0	0	0	0	YES
chr13	99540802	99540885	-	DOCK9	0	0	0	0	0	0	0	0	0	YES
chr13	101277931	101278038	-	TMTC4	0	0	0	0	0	0	0	0	-0.376667	YES
chr13	101278147	101278324	-	TMTC4	0	0	0	0	0	0	0	0	-0.356667	YES
chr13	103443489	103443607	-	KDELC1	0	0	0	0	0	0	0	0	0.163333	YES
chr13	103446157	103449153	-	KDELC1	0	0	0	0	0	0	0	0	-0.27	YES
chr13	103473483	103474092	+	BIVM	0	0	0	0	0	0	0	0	0	YES
chr13	110804854	110807629	-	COL4A1	0	0	0	0	0	0	0	0	-0.3	YES
chr13	110813717	110814576	-	COL4A1	0	0	0	0	0	0	0	0	-0.25	YES
chr13	110817338	110818578	-	COL4A1	0	0	0	0	0	0	0	0	0	YES
chr13	110818651	110819504	-	COL4A1	0	0	0	0	0	0	0	0	0	YES
chr13	110826874	110826969	-	COL4A1	0	0	0	0	0	0	0	0	0	YES
chr13	110828861	110828972	-	COL4A1	0	0	0	0	0	0	0	0	0	YES
chr13	110829072	110829231	-	COL4A1	0	0	0	0	0	0	0	0	0	YES
chr13	110830279	110830410	-	COL4A1	0	0	0	0	0	0	0	0	0	YES
chr13	110830579	110831269	-	COL4A1	0	0	0	0	0	0	0	0	0	YES
chr13	110831384	110831617	-	COL4A1	0	0	0	0	0	0	0	0	0	YES
chr13	110835445	110835530	-	COL4A1	0	0	0	0	0	0	0	0	-0.383333	YES
chr13	110844632	110845176	-	COL4A1	0	0	0	0	0	0	0	0	0	YES
chr13	110857886	110859011	-	COL4A1	0	0	0	0	0	0	0	0	0	YES
chr13	110859063	110859211	-	COL4A1	0	0	0	0	0	0	0	0	0	YES
chr13	110859239	110859749	-	COL4A1	0	0	0	0	0	0	0	0	0	YES
chr13	110861238	110861738	-	COL4A1	0	0	0	0	0	0	0	0	0	YES
chr13	110864270	110864763	-	COL4A1	0	0	0	0	0	0	0	0	0	YES
chr13	110864827	110864920	-	COL4A1	0	0	0	0	0	0	0	0	0	YES
chr13	110960295	110960415	+	COL4A2	0	0	0	0	0	0	0	0	0.133333	YES
chr13	111114534	111114624	+	COL4A2	0	0	0	0	0	0	0	0	0.0766667	YES
chr13	111155630	111155729	+	COL4A2	0	0	0	0	0	0	0	0	0	YES
chr13	111156341	111156494	+	COL4A2	0	0	0	0	0	0	0	0	-0.393333	YES
chr14	20764014	20764548	-	TTC5	0	0	0	0	0	0	0	0	0	YES
chr14	20767048	20767456	-	TTC5	0	0	0	0	0	0	0	0	0.68	YES
chr14	20823975	20824055	+	PARP2	0	0	0	0	0	0	0	0	0.123333	YES
chr14	20943108	20943220	+	PNP	0	0	0	0	0	0	0	0	-0.39	YES
chr14	20943412	20944542	+	PNP	0	0	0	0	0	0	0	0	-0.156667	YES
chr14	21485922	21486145	-	NDRG2	0	0	0	0	0	0	0	0	0.763333	YES
chr14	21486198	21486362	-	NDRG2	0	0	0	0	0	0	0	0	-0.61	YES
chr14	21486974	21487274	-	NDRG2	0	0	0	0	0	0	0	0	-1.26	YES
chr14	21544616	21544721	+	ARHGEF40	0	0	0	0	0	0	0	0	-2.90667	YES
chr14	21548942	21549031	+	ARHGEF40	0	0	0	0	0	0	0	0	-0.97	YES
chr14	21559300	21559569	-	ZNF219	0	0	0	0	0	0	0	0	-3.26667	YES
chr14	21559702	21560023	-	ZNF219	0	0	0	0	0	0	0	0	-4.2	YES
chr14	23240390	23240476	+	OXA1L	0	0	0	0	0	0	0	0	0.1	YES
chr14	23299158	23299258	+	MRPL52	0	0	0	0	0	0	0	0	-14.7833	YES
chr14	23341992	23342519	+	LRP10	0	0	0	0	0	0	0	0	0.0766667	YES
chr14	23344455	23344563	+	LRP10	0	0	0	0	0	0	0	0	-0.76	YES
chr14	23346028	23346148	+	LRP10	0	0	0	0	0	0	0	0	0	YES
chr14	23456844	23457111	-	C14orf93	0	0	0	0	0	0	0	0	1.62333	YES
chr14	23459055	23459274	-	C14orf93	0	0	0	0	0	0	0	0	4.08667	YES
chr14	23516584	23516669	-	CDH24	0	0	0	0	0	0	0	0	-0.316667	YES
chr14	23524076	23524267	-	CDH24	0	0	0	0	0	0	0	0	0.4	YES
chr14	24588826	24588919	+	DCAF11	0	0	0	0	0	0	0	0	0	YES
chr14	24608664	24608753	-	FAM158A	0	0	0	0	0	0	0	0	0.42	YES
chr14	24624540	24624622	+	RNF31	0	0	0	0	0	0	0	0	0.706667	YES
chr14	24664243	24664551	-	TM9SF1	0	0	0	0	0	0	0	0	-1.31333	YES
chr14	24685004	24685124	-	MDP1	0	0	0	0	0	0	0	0	-1.34	YES
chr14	24706359	24706450	+	GMPR2	0	0	0	0	0	0	0	0	0.24	YES
chr14	24706558	24706725	+	GMPR2	0	0	0	0	0	0	0	0	-0.41	YES
chr14	24710518	24710880	-	TINF2	0	0	0	0	0	0	0	0	0.153333	YES
chr14	24710983	24711095	-	TINF2	0	0	0	0	0	0	0	0	0.126667	YES
chr14	24760202	24760344	-	DHRS1	0	0	0	0	0	0	0	0	-0.713333	YES
chr14	24774972	24775152	-	CIDEB	0	0	0	0	0	0	0	0	-2.93667	YES
chr14	24776722	24777023	-	CIDEB	0	0	0	0	0	0	0	0	1.59667	YES
chr14	31348692	31349657	+	COCH	0	0	0	0	0	0	0	0	3.03	YES
chr14	31349703	31349792	+	COCH	0	0	0	0	0	0	0	0	-1.91	YES
chr14	31354827	31355001	+	COCH	0	0	0	0	0	0	0	0	0.94	YES
chr14	31539136	31542110	+	AP4S1	0	0	0	0	0	0	0	0	0	YES
chr14	32142601	32142689	+	NUBPL	0	0	0	0	0	0	0	0	0	YES
chr14	39763276	39764128	+	CTAGE5	0	0	0	0	0	0	0	0	0	YES
chr14	50244673	50244895	+	KLHDC2	0	0	0	0	0	0	0	0	0.0633333	YES
chr14	50623840	50625282	-	SOS2	0	0	0	0	0	0	0	0	-0.9	YES
chr14	50625365	50626148	-	SOS2	0	0	0	0	0	0	0	0	5.67	YES
chr14	50915551	50923233	-	MAP4K5	0	0	0	0	0	0	0	0	0.0866667	YES
chr14	51087445	51088560	+	ATL1	0	0	0	0	0	0	0	0	-0.203333	YES
chr14	51088618	51089894	+	ATL1	0	0	0	0	0	0	0	0	-0.51	YES
chr14	51089967	51094748	+	ATL1	0	0	0	0	0	0	0	0	-5.2	YES
chr14	51233115	51233497	-	NIN	0	0	0	0	0	0	0	0	0	YES
chr14	51378590	51378695	-	PYGL	0	0	0	0	0	0	0	0	-0.0566667	YES
chr14	51716288	51716410	+	TMX1	0	0	0	0	0	0	0	0	0	YES
chr14	52957170	52957556	-	TXNDC16	0	0	0	0	0	0	0	0	0	YES
chr14	58909599	58910671	+	KIAA0586	0	0	0	0	0	0	0	0	0	YES
chr14	58924698	58925190	+	KIAA0586	0	0	0	0	0	0	0	0	0	YES
chr14	59790957	59791068	+	DAAM1	0	0	0	0	0	0	0	0	-0.63	YES
chr14	62187291	62188226	+	HIF1A	0	0	0	0	0	0	0	0	-0.103333	YES
chr14	62188373	62188456	+	HIF1A	0	0	0	0	0	0	0	0	-0.236667	YES
chr14	62188542	62193423	+	HIF1A	0	0	0	0	0	0	0	0	0.0833333	YES
chr14	62193537	62194170	+	HIF1A	0	0	0	0	0	0	0	0	0	YES
chr14	62194374	62199135	+	HIF1A	0	0	0	0	0	0	0	0	0	YES
chr14	62199243	62200855	+	HIF1A	0	0	0	0	0	0	0	0	0.01	YES
chr14	62201004	62203606	+	HIF1A	0	0	0	0	0	0	0	0	-0.203333	YES
chr14	62203828	62204804	+	HIF1A	0	0	0	0	0	0	0	0	0.05	YES
chr14	62205092	62207222	+	HIF1A	0	0	0	0	0	0	0	0	0.596667	YES
chr14	62207346	62207472	+	HIF1A	0	0	0	0	0	0	0	0	0	YES
chr14	62207907	62211422	+	HIF1A	0	0	0	0	0	0	0	0	0.00666667	YES
chr14	62211532	62212408	+	HIF1A	0	0	0	0	0	0	0	0	0.00333333	YES
chr14	62212536	62213651	+	HIF1A	0	0	0	0	0	0	0	0	0.213333	YES
chr14	64449513	64450454	+	SYNE2	0	0	0	0	0	0	0	0	0	YES
chr14	65054091	65054821	+	C14orf50	0	0	0	0	0	0	0	0	0	YES
chr14	65216415	65216698	-	SPTB	0	0	0	0	0	0	0	0	0	YES
chr14	65415231	65415385	-	RAB15	0	0	0	0	0	0	0	0	-2.62667	YES
chr14	66082812	66082928	+	FUT8	0	0	0	0	0	0	0	0	0	YES
chr14	67783621	67784124	+	MPP5	0	0	0	0	0	0	0	0	0	YES
chr14	68113743	68114763	+	ARG2	0	0	0	0	0	0	0	0	13.33	YES
chr14	68229130	68229388	-	ZFYVE26	0	0	0	0	0	0	0	0	0	YES
chr14	68273393	68274114	-	ZFYVE26	0	0	0	0	0	0	0	0	0.68	YES
chr14	69670718	69676140	+	EXD2	0	0	0	0	0	0	0	0	0	YES
chr14	69703260	69704291	+	EXD2	0	0	0	0	0	0	0	0	0	YES
chr14	72202109	72204957	+	SIPA1L1	0	0	0	0	0	0	0	0	0	YES
chr14	73441668	73442258	-	ZFYVE1	0	0	0	0	0	0	0	0	0	YES
chr14	73444943	73445568	-	ZFYVE1	0	0	0	0	0	0	0	0	0.953333	YES
chr14	74442719	74443026	-	ENTPD5	0	0	0	0	0	0	0	0	0	YES
chr14	74533590	74534082	-	ALDH6A1	0	0	0	0	0	0	0	0	0	YES
chr14	74534273	74535562	-	ALDH6A1	0	0	0	0	0	0	0	0	0	YES
chr14	74535685	74537897	-	ALDH6A1	0	0	0	0	0	0	0	0	0	YES
chr14	74960549	74960752	+	ISCA2	0	0	0	0	0	0	0	0	0.18	YES
chr14	75470099	75470253	+	EIF2B2	0	0	0	0	0	0	0	0	-0.606667	YES
chr14	76107404	76107524	+	FLVCR2	0	0	0	0	0	0	0	0	1.46	YES
chr14	77257118	77257639	-	ANGEL1	0	0	0	0	0	0	0	0	0	YES
chr14	77273846	77274264	-	ANGEL1	0	0	0	0	0	0	0	0	0	YES
chr14	77746272	77746363	-	POMT2	0	0	0	0	0	0	0	0	1.57667	YES
chr14	77915701	77916056	-	VIPAR	0	0	0	0	0	0	0	0	0	YES
chr14	78398055	78399562	+	ADCK1	0	0	0	0	0	0	0	0	0	YES
chr14	88934610	88935259	-	PTPN21	0	0	0	0	0	0	0	0	-1.00333	YES
chr14	88967713	88970768	-	PTPN21	0	0	0	0	0	0	0	0	0	YES
chr14	89307273	89307380	+	TTC8	0	0	0	0	0	0	0	0	0	YES
chr14	90769470	90770278	-	C14orf102	0	0	0	0	0	0	0	0	1.09	YES
chr14	92264246	92264642	-	TC2N	0	0	0	0	0	0	0	0	0	YES
chr14	92265409	92266624	-	TC2N	0	0	0	0	0	0	0	0	0	YES
chr14	92347763	92349297	-	FBLN5	0	0	0	0	0	0	0	0	0	YES
chr14	92353657	92357564	-	FBLN5	0	0	0	0	0	0	0	0	0	YES
chr14	92480922	92482039	-	TRIP11	0	0	0	0	0	0	0	0	0	YES
chr14	94594330	94594850	-	IFI27L2	0	0	0	0	0	0	0	0	0	YES
chr14	96756928	96757150	-	ATG2B	0	0	0	0	0	0	0	0	1.24	YES
chr14	96768446	96769397	-	ATG2B	0	0	0	0	0	0	0	0	0	YES
chr14	96769593	96770831	-	ATG2B	0	0	0	0	0	0	0	0	0.443333	YES
chr14	96781572	96781720	-	ATG2B	0	0	0	0	0	0	0	0	0	YES
chr14	97322588	97322864	+	VRK1	0	0	0	0	0	0	0	0	0	YES
chr14	100375817	100376578	+	EML1	0	0	0	0	0	0	0	0	0	YES
chr14	100402464	100402583	+	EML1	0	0	0	0	0	0	0	0	0	YES
chr14	100595086	100595899	+	EVL	0	0	0	0	0	0	0	0	0	YES
chr14	100759370	100759630	-	SLC25A29	0	0	0	0	0	0	0	0	-0.00333333	YES
chr14	100801374	100803398	-	WARS	0	0	0	0	0	0	0	0	-0.06	YES
chr14	103599210	103599698	+	TNFAIP2	0	0	0	0	0	0	0	0	0.0666667	YES
chr14	103599855	103600018	+	TNFAIP2	0	0	0	0	0	0	0	0	-0.26	YES
chr14	104165517	104165700	-	XRCC3	0	0	0	0	0	0	0	0	1.61333	YES
chr14	105360926	105361047	+	KIAA0284	0	0	0	0	0	0	0	0	0.3	YES
chr14	105421137	105421293	-	AHNAK2	0	0	0	0	0	0	0	0	0	YES
chr14	105423846	105423950	-	AHNAK2	0	0	0	0	0	0	0	0	0	YES
chr14	105715423	105715493	+	BTBD6	0	0	0	0	0	0	0	0	1.39667	YES
chr14	105945557	105945772	+	CRIP2	0	0	0	0	0	0	0	0	-1.76667	YES
chr14	105945831	105945922	+	CRIP2	0	0	0	0	0	0	0	0	-3.22667	YES
chr14	105954598	105954667	+	CRIP1	0	0	0	0	0	0	0	0	0.0233333	YES
chr15	22841119	22842047	+	TUBGCP5	0	0	0	0	0	0	0	0	0	YES
chr15	22861936	22862934	+	TUBGCP5	0	0	0	0	0	0	0	0	0	YES
chr15	22933658	22933747	+	CYFIP1	0	0	0	0	0	0	0	0	0	YES
chr15	25223064	25223339	+	SNURF	0	0	0	0	0	0	0	0	0	YES
chr15	28228630	28230209	-	OCA2	0	0	0	0	0	0	0	0	0	YES
chr15	28389138	28389222	-	HERC2	0	0	0	0	0	0	0	0	0	YES
chr15	28510878	28510962	-	HERC2	0	0	0	0	0	0	0	0	0	YES
chr15	30010323	30010469	-	TJP1	0	0	0	0	0	0	0	0	0	YES
chr15	31245835	31246965	-	MTMR10	0	0	0	0	0	0	0	0	0	YES
chr15	34528401	34528908	-	SLC12A6	0	0	0	0	0	0	0	0	0	YES
chr15	34536274	34537485	-	SLC12A6	0	0	0	0	0	0	0	0	0	YES
chr15	35082757	35083314	-	ACTC1	0	0	0	0	0	0	0	0	1.75	YES
chr15	35083497	35084290	-	ACTC1	0	0	0	0	0	0	0	0	1.80333	YES
chr15	35084483	35084608	-	ACTC1	0	0	0	0	0	0	0	0	0.506667	YES
chr15	35084771	35085445	-	ACTC1	0	0	0	0	0	0	0	0	-0.62	YES
chr15	35085771	35086880	-	ACTC1	0	0	0	0	0	0	0	0	-1.83	YES
chr15	39876389	39876500	+	THBS1	0	0	0	0	0	0	0	0	-0.773333	YES
chr15	39881288	39881402	+	THBS1	0	0	0	0	0	0	0	0	0.55	YES
chr15	39883552	39883705	+	THBS1	0	0	0	0	0	0	0	0	0.986667	YES
chr15	39885004	39885200	+	THBS1	0	0	0	0	0	0	0	0	1.39	YES
chr15	39885429	39885597	+	THBS1	0	0	0	0	0	0	0	0	1.07	YES
chr15	39886398	39886501	+	THBS1	0	0	0	0	0	0	0	0	2.88	YES
chr15	40294990	40295393	+	EIF2AK4	0	0	0	0	0	0	0	0	0	YES
chr15	40502412	40504699	+	BUB1B	0	0	0	0	0	0	0	0	0.00333333	YES
chr15	40947176	40949239	+	CASC5	0	0	0	0	0	0	0	0	1.07667	YES
chr15	41071509	41071742	-	DNAJC17	0	0	0	0	0	0	0	0	0	YES
chr15	41148261	41148473	+	SPINT1	0	0	0	0	0	0	0	0	0.126667	YES
chr15	41769485	41769655	+	RTF1	0	0	0	0	0	0	0	0	0	YES
chr15	41794050	41794194	+	ITPKA	0	0	0	0	0	0	0	0	0	YES
chr15	41809890	41809995	-	RPAP1	0	0	0	0	0	0	0	0	0	YES
chr15	41821767	41822061	-	RPAP1	0	0	0	0	0	0	0	0	0	YES
chr15	41862355	41862437	+	TYRO3	0	0	0	0	0	0	0	0	0.28	YES
chr15	41865666	41865876	+	TYRO3	0	0	0	0	0	0	0	0	0.206667	YES
chr15	42139722	42139846	+	JMJD7-PLA2G4B	0	0	0	0	0	0	0	0	2.17333	YES
chr15	42458848	42458969	-	VPS39	0	0	0	0	0	0	0	0	-0.236667	YES
chr15	42470537	42470647	-	VPS39	0	0	0	0	0	0	0	0	0	YES
chr15	42600517	42602480	+	GANC	0	0	0	0	0	0	0	0	0	YES
chr15	42602662	42602890	+	GANC	0	0	0	0	0	0	0	0	0	YES
chr15	43477806	43478017	+	CCNDBP1	0	0	0	0	0	0	0	0	-1.93	YES
chr15	43483241	43483592	+	CCNDBP1	0	0	0	0	0	0	0	0	-0.2	YES
chr15	44068743	44068967	-	ELL3	0	0	0	0	0	0	0	0	-1.6	YES
chr15	44087412	44087585	-	SERINC4	0	0	0	0	0	0	0	0	-2.32	YES
chr15	44105346	44105446	-	MFAP1	0	0	0	0	0	0	0	0	0.166667	YES
chr15	44829436	44829521	+	EIF3J	0	0	0	0	0	0	0	0	0.1	YES
chr15	44944138	44944326	-	SPG11	0	0	0	0	0	0	0	0	0	YES
chr15	45656215	45656994	-	GATM	0	0	0	0	0	0	0	0	0.163333	YES
chr15	45657059	45658243	-	GATM	0	0	0	0	0	0	0	0	0	YES
chr15	45658707	45660267	-	GATM	0	0	0	0	0	0	0	0	0	YES
chr15	45660459	45661523	-	GATM	0	0	0	0	0	0	0	0	0	YES
chr15	45897713	45898592	+	PLDN	0	0	0	0	0	0	0	0	-0.136667	YES
chr15	48053949	48054396	+	SEMA6D	0	0	0	0	0	0	0	0	-0.47	YES
chr15	48056265	48056370	+	SEMA6D	0	0	0	0	0	0	0	0	-0.563333	YES
chr15	48056991	48057079	+	SEMA6D	0	0	0	0	0	0	0	0	0	YES
chr15	48713004	48713754	-	FBN1	0	0	0	0	0	0	0	0	0	YES
chr15	48713884	48714148	-	FBN1	0	0	0	0	0	0	0	0	0	YES
chr15	48717689	48717935	-	FBN1	0	0	0	0	0	0	0	0	0	YES
chr15	48757891	48757986	-	FBN1	0	0	0	0	0	0	0	0	0	YES
chr15	48760300	48760608	-	FBN1	0	0	0	0	0	0	0	0	0	YES
chr15	48766575	48766724	-	FBN1	0	0	0	0	0	0	0	0	-0.546667	YES
chr15	48776141	48777570	-	FBN1	0	0	0	0	0	0	0	0	0	YES
chr15	48777694	48779271	-	FBN1	0	0	0	0	0	0	0	0	0	YES
chr15	48779398	48779508	-	FBN1	0	0	0	0	0	0	0	0	0	YES
chr15	48779635	48780309	-	FBN1	0	0	0	0	0	0	0	0	0	YES
chr15	48787458	48787665	-	FBN1	0	0	0	0	0	0	0	0	0	YES
chr15	48789589	48791181	-	FBN1	0	0	0	0	0	0	0	0	0	YES
chr15	48807725	48808379	-	FBN1	0	0	0	0	0	0	0	0	0	YES
chr15	49036541	49037092	-	CEP152	0	0	0	0	0	0	0	0	-0.383333	YES
chr15	50788282	50789285	+	USP8	0	0	0	0	0	0	0	0	-0.286667	YES
chr15	50866917	50867048	-	TRPM7	0	0	0	0	0	0	0	0	0.17	YES
chr15	51750825	51750905	-	DMXL2	0	0	0	0	0	0	0	0	-2.59667	YES
chr15	51780317	51780744	-	DMXL2	0	0	0	0	0	0	0	0	0	YES
chr15	52486252	52487573	-	MYO5C	0	0	0	0	0	0	0	0	-0.303333	YES
chr15	52487655	52488505	-	MYO5C	0	0	0	0	0	0	0	0	0.07	YES
chr15	52488681	52497061	-	MYO5C	0	0	0	0	0	0	0	0	-2.51	YES
chr15	52497345	52498012	-	MYO5C	0	0	0	0	0	0	0	0	-2.69667	YES
chr15	52645856	52646067	-	MYO5A	0	0	0	0	0	0	0	0	0	YES
chr15	52671931	52672018	-	MYO5A	0	0	0	0	0	0	0	0	0	YES
chr15	56126344	56126424	-	NEDD4	0	0	0	0	0	0	0	0	-0.833333	YES
chr15	56721392	56723570	-	MNS1	0	0	0	0	0	0	0	0	-6.14	YES
chr15	56736053	56736641	-	MNS1	0	0	0	0	0	0	0	0	-3.23333	YES
chr15	56756446	56757167	-	MNS1	0	0	0	0	0	0	0	0	0	YES
chr15	62212531	62212696	-	VPS13C	0	0	0	0	0	0	0	0	0	YES
chr15	62214233	62214595	-	VPS13C	0	0	0	0	0	0	0	0	0.443333	YES
chr15	62277199	62283198	-	VPS13C	0	0	0	0	0	0	0	0	0	YES
chr15	62945514	62948142	+	TLN2	0	0	0	0	0	0	0	0	0	YES
chr15	62966090	62967415	+	TLN2	0	0	0	0	0	0	0	0	0	YES
chr15	62993414	62994190	+	TLN2	0	0	0	0	0	0	0	0	0	YES
chr15	63054021	63054470	+	TLN2	0	0	0	0	0	0	0	0	0	YES
chr15	63092693	63092851	+	TLN2	0	0	0	0	0	0	0	0	0	YES
chr15	63547784	63548703	+	RAB8B	0	0	0	0	0	0	0	0	0	YES
chr15	63935750	63937190	-	HERC1	0	0	0	0	0	0	0	0	0	YES
chr15	64041738	64041845	-	HERC1	0	0	0	0	0	0	0	0	0	YES
chr15	64045285	64046703	-	HERC1	0	0	0	0	0	0	0	0	0	YES
chr15	64422229	64422426	+	SNX1	0	0	0	0	0	0	0	0	0	YES
chr15	65936852	65937949	+	SLC24A1	0	0	0	0	0	0	0	0	2.77667	YES
chr15	65993531	65994099	-	DENND4A	0	0	0	0	0	0	0	0	0	YES
chr15	65994229	65994642	-	DENND4A	0	0	0	0	0	0	0	0	0	YES
chr15	66625249	66625341	+	DIS3L	0	0	0	0	0	0	0	0	2.61667	YES
chr15	66644546	66645152	-	TIPIN	0	0	0	0	0	0	0	0	0	YES
chr15	67528843	67528967	-	AAGAB	0	0	0	0	0	0	0	0	0	YES
chr15	67938638	67938725	+	MAP2K5	0	0	0	0	0	0	0	0	0	YES
chr15	69727902	69727990	+	KIF23	0	0	0	0	0	0	0	0	0	YES
chr15	71174990	71175099	-	THAP10	0	0	0	0	0	0	0	0	0	YES
chr15	73551218	73552611	+	NEO1	0	0	0	0	0	0	0	0	0	YES
chr15	73552807	73558656	+	NEO1	0	0	0	0	0	0	0	0	0	YES
chr15	73562575	73562656	+	NEO1	0	0	0	0	0	0	0	0	0	YES
chr15	73564904	73566151	+	NEO1	0	0	0	0	0	0	0	0	0	YES
chr15	73590953	73593661	+	NEO1	0	0	0	0	0	0	0	0	0	YES
chr15	74630445	74630911	-	CYP11A1	0	0	0	0	0	0	0	0	0.71	YES
chr15	74709056	74709675	-	SEMA7A	0	0	0	0	0	0	0	0	0	YES
chr15	74749013	74751024	-	UBL7	0	0	0	0	0	0	0	0	0.0866667	YES
chr15	75093937	75094035	+	CSK	0	0	0	0	0	0	0	0	1.47667	YES
chr15	75304188	75305017	+	SCAMP5	0	0	0	0	0	0	0	0	-0.586667	YES
chr15	75644729	75644942	+	NEIL1	0	0	0	0	0	0	0	0	-3.92667	YES
chr15	75660540	75660823	-	MAN2C1	0	0	0	0	0	0	0	0	-11.7267	YES
chr15	75974801	75974947	-	CSPG4	0	0	0	0	0	0	0	0	0	YES
chr15	76643630	76646289	-	SCAPER	0	0	0	0	0	0	0	0	0	YES
chr15	77344811	77345118	-	TSPAN3	0	0	0	0	0	0	0	0	0	YES
chr15	78305660	78308887	-	TBC1D2B	0	0	0	0	0	0	0	0	-0.756667	YES
chr15	78401725	78403506	-	CIB2	0	0	0	0	0	0	0	0	0.94	YES
chr15	78838107	78838916	+	PSMA4	0	0	0	0	0	0	0	0	0	YES
chr15	79215461	79217675	-	CTSH	0	0	0	0	0	0	0	0	0.293333	YES
chr15	79223849	79224713	-	CTSH	0	0	0	0	0	0	0	0	0	YES
chr15	79227425	79228021	-	CTSH	0	0	0	0	0	0	0	0	0	YES
chr15	79228093	79229659	-	CTSH	0	0	0	0	0	0	0	0	0	YES
chr15	89449133	89449856	-	MFGE8	0	0	0	0	0	0	0	0	-0.373333	YES
chr15	89450010	89450425	-	MFGE8	0	0	0	0	0	0	0	0	0	YES
chr15	89848474	89848571	+	FANCI	0	0	0	0	0	0	0	0	0.27	YES
chr15	90172354	90172605	-	KIF7	0	0	0	0	0	0	0	0	1.33333	YES
chr15	90628141	90628232	-	IDH2	0	0	0	0	0	0	0	0	0	YES
chr15	91422775	91422900	+	FURIN	0	0	0	0	0	0	0	0	-0.206667	YES
chr15	102211790	102211873	-	TARSL2	0	0	0	0	0	0	0	0	-0.973333	YES
chr16	314716	314809	+	ITFG3	0	0	0	0	0	0	0	0	-0.103333	YES
chr16	418415	418500	-	MRPL28	0	0	0	0	0	0	0	0	0.303333	YES
chr16	427586	427670	-	TMEM8A	0	0	0	0	0	0	0	0	0	YES
chr16	460368	460690	+	DECR2	0	0	0	0	0	0	0	0	-5.17667	YES
chr16	733782	733860	-	JMJD8	0	0	0	0	0	0	0	0	-1.89333	YES
chr16	733910	734065	-	JMJD8	0	0	0	0	0	0	0	0	-6.81667	YES
chr16	778425	778503	+	HAGHL	0	0	0	0	0	0	0	0	-3.59	YES
chr16	1402019	1402102	+	GNPTG	0	0	0	0	0	0	0	0	-2.81667	YES
chr16	1411957	1412038	+	GNPTG	0	0	0	0	0	0	0	0	-0.326667	YES
chr16	1412908	1412997	+	GNPTG	0	0	0	0	0	0	0	0	-0.26	YES
chr16	1573702	1573828	-	IFT140	0	0	0	0	0	0	0	0	0	YES
chr16	1574697	1574784	-	IFT140	0	0	0	0	0	0	0	0	-3.34	YES
chr16	1828050	1828134	-	SPSB3	0	0	0	0	0	0	0	0	13.8267	YES
chr16	2030183	2030367	-	NOXO1	0	0	0	0	0	0	0	0	0	YES
chr16	2034945	2035866	+	GFER	0	0	0	0	0	0	0	0	0.0966667	YES
chr16	2140196	2140285	-	PKD1	0	0	0	0	0	0	0	0	-0.793333	YES
chr16	2203224	2203319	+	RAB26	0	0	0	0	0	0	0	0	-4.01333	YES
chr16	3188543	3188745	+	ZNF213	0	0	0	0	0	0	0	0	2.08333	YES
chr16	3367023	3367189	+	ZNF75A	0	0	0	0	0	0	0	0	1.45333	YES
chr16	3493207	3493359	-	ZNF597	0	0	0	0	0	0	0	0	-2.38	YES
chr16	4383521	4384801	+	GLIS2	0	0	0	0	0	0	0	0	0.303333	YES
chr16	4408485	4409296	-	CORO7	0	0	0	0	0	0	0	0	-4.24333	YES
chr16	4409387	4409480	-	CORO7	0	0	0	0	0	0	0	0	-0.91	YES
chr16	4410550	4410943	-	CORO7	0	0	0	0	0	0	0	0	0.853333	YES
chr16	4411087	4411162	-	CORO7	0	0	0	0	0	0	0	0	0.583333	YES
chr16	4411250	4411361	-	CORO7	0	0	0	0	0	0	0	0	0	YES
chr16	4414922	4415003	-	CORO7	0	0	0	0	0	0	0	0	-0.263333	YES
chr16	4563853	4564046	-	C16orf5	0	0	0	0	0	0	0	0	-1.45	YES
chr16	4848186	4848569	-	ROGDI	0	0	0	0	0	0	0	0	-1.06	YES
chr16	4943372	4943541	-	PPL	0	0	0	0	0	0	0	0	1.12333	YES
chr16	4949122	4949223	-	PPL	0	0	0	0	0	0	0	0	0.75	YES
chr16	5077895	5077980	-	NAGPA	0	0	0	0	0	0	0	0	-0.106667	YES
chr16	10837740	10837817	+	NUBP1	0	0	0	0	0	0	0	0	-1.82667	YES
chr16	11868376	11868835	-	ZC3H7A	0	0	0	0	0	0	0	0	0	YES
chr16	14038693	14041470	+	ERCC4	0	0	0	0	0	0	0	0	0	YES
chr16	15134979	15135479	-	NTAN1	0	0	0	0	0	0	0	0	-0.353333	YES
chr16	15694411	15694497	-	KIAA0430	0	0	0	0	0	0	0	0	3.17333	YES
chr16	15702376	15703379	-	KIAA0430	0	0	0	0	0	0	0	0	0.583333	YES
chr16	15818267	15818503	-	MYH11	0	0	0	0	0	0	0	0	0	YES
chr16	15818657	15818744	-	MYH11	0	0	0	0	0	0	0	0	0	YES
chr16	19049370	19051610	+	TMC7	0	0	0	0	0	0	0	0	0	YES
chr16	19087183	19088627	+	COQ7	0	0	0	0	0	0	0	0	0.746667	YES
chr16	19477556	19481002	+	TMC5	0	0	0	0	0	0	0	0	0	YES
chr16	19481148	19483409	+	TMC5	0	0	0	0	0	0	0	0	0	YES
chr16	19503551	19505583	+	TMC5	0	0	0	0	0	0	0	0	-2.15	YES
chr16	19640076	19641088	+	C16orf62	0	0	0	0	0	0	0	0	0	YES
chr16	19656272	19659105	+	C16orf62	0	0	0	0	0	0	0	0	0	YES
chr16	19710971	19711699	+	C16orf62	0	0	0	0	0	0	0	0	4.58333	YES
chr16	20792180	20792295	+	ACSM3	0	0	0	0	0	0	0	0	0	YES
chr16	20807812	20808207	+	ACSM3	0	0	0	0	0	0	0	0	9.65667	YES
chr16	20810674	20811278	-	ERI2	0	0	0	0	0	0	0	0	1.07	YES
chr16	23649274	23649390	-	PALB2	0	0	0	0	0	0	0	0	-0.81	YES
chr16	24567025	24567141	+	RBBP6	0	0	0	0	0	0	0	0	-0.166667	YES
chr16	24574617	24574743	+	RBBP6	0	0	0	0	0	0	0	0	0.35	YES
chr16	25255598	25258027	-	ZKSCAN2	0	0	0	0	0	0	0	0	2.65667	YES
chr16	28916835	28917024	-	RABEP2	0	0	0	0	0	0	0	0	-0.0566667	YES
chr16	28922308	28922404	-	RABEP2	0	0	0	0	0	0	0	0	0.563333	YES
chr16	28993867	28994177	+	SPNS1	0	0	0	0	0	0	0	0	-0.21	YES
chr16	29845178	29845255	+	MVP	0	0	0	0	0	0	0	0	-0.27	YES
chr16	29847120	29848042	+	MVP	0	0	0	0	0	0	0	0	0	YES
chr16	29853434	29855813	+	MVP	0	0	0	0	0	0	0	0	0	YES
chr16	29856201	29857183	+	MVP	0	0	0	0	0	0	0	0	0	YES
chr16	29857301	29857478	+	MVP	0	0	0	0	0	0	0	0	0	YES
chr16	29857606	29858517	+	MVP	0	0	0	0	0	0	0	0	0	YES
chr16	29858707	29859082	+	MVP	0	0	0	0	0	0	0	0	-0.3	YES
chr16	29883050	29883507	-	SEZ6L2	0	0	0	0	0	0	0	0	0	YES
chr16	29883605	29883729	-	SEZ6L2	0	0	0	0	0	0	0	0	0	YES
chr16	29888272	29888591	-	SEZ6L2	0	0	0	0	0	0	0	0	0	YES
chr16	29889747	29891184	-	SEZ6L2	0	0	0	0	0	0	0	0	-0.483333	YES
chr16	29891386	29896906	-	SEZ6L2	0	0	0	0	0	0	0	0	0	YES
chr16	29897071	29898969	-	SEZ6L2	0	0	0	0	0	0	0	0	0	YES
chr16	29899139	29899860	-	SEZ6L2	0	0	0	0	0	0	0	0	-0.206667	YES
chr16	29990392	29990515	+	TAOK2	0	0	0	0	0	0	0	0	0.106667	YES
chr16	30017831	30017916	-	DOC2A	0	0	0	0	0	0	0	0	-0.35	YES
chr16	30017999	30018105	-	DOC2A	0	0	0	0	0	0	0	0	0.68	YES
chr16	30020427	30020522	-	DOC2A	0	0	0	0	0	0	0	0	0	YES
chr16	30106219	30106423	-	YPEL3	0	0	0	0	0	0	0	0	3.46333	YES
chr16	30128112	30128214	-	MAPK3	0	0	0	0	0	0	0	0	0.166667	YES
chr16	30129485	30129669	-	MAPK3	0	0	0	0	0	0	0	0	0.21	YES
chr16	30369895	30369983	-	TBC1D10B	0	0	0	0	0	0	0	0	-0.366667	YES
chr16	30581758	30582330	-	ZNF688	0	0	0	0	0	0	0	0	-0.3	YES
chr16	30676242	30676355	+	FBRS	0	0	0	0	0	0	0	0	-0.246667	YES
chr16	30680301	30680389	+	FBRS	0	0	0	0	0	0	0	0	-0.436667	YES
chr16	30759812	30760123	+	PHKG2	0	0	0	0	0	0	0	0	-0.403333	YES
chr16	30760237	30762426	+	PHKG2	0	0	0	0	0	0	0	0	-0.493333	YES
chr16	30904069	30904160	-	BCL7C	0	0	0	0	0	0	0	0	0.183333	YES
chr16	30938981	30939065	+	FBXL19	0	0	0	0	0	0	0	0	0.17	YES
chr16	30953601	30953695	+	FBXL19	0	0	0	0	0	0	0	0	-0.346667	YES
chr16	30958270	30958372	+	FBXL19	0	0	0	0	0	0	0	0	-0.176667	YES
chr16	31138410	31138509	+	MYST1	0	0	0	0	0	0	0	0	-0.33	YES
chr16	31485056	31485155	+	TGFB1I1	0	0	0	0	0	0	0	0	-2.33333	YES
chr16	31485777	31485883	+	TGFB1I1	0	0	0	0	0	0	0	0	0	YES
chr16	31501552	31501629	+	SLC5A2	0	0	0	0	0	0	0	0	0	YES
chr16	31510729	31510813	-	C16orf58	0	0	0	0	0	0	0	0	0.226667	YES
chr16	46638056	46638139	-	SHCBP1	0	0	0	0	0	0	0	0	0	YES
chr16	47684538	47684741	+	PHKB	0	0	0	0	0	0	0	0	0	YES
chr16	50258906	50259008	+	PAPD5	0	0	0	0	0	0	0	0	0.55	YES
chr16	50345698	50345946	+	ADCY7	0	0	0	0	0	0	0	0	0	YES
chr16	50349050	50349269	+	ADCY7	0	0	0	0	0	0	0	0	-1.17667	YES
chr16	50826617	50827456	+	CYLD	0	0	0	0	0	0	0	0	0.74	YES
chr16	53495763	53496463	+	RBL2	0	0	0	0	0	0	0	0	0	YES
chr16	53526432	53526604	-	AKTIP	0	0	0	0	0	0	0	0	-0.523333	YES
chr16	53675029	53675196	-	RPGRIP1L	0	0	0	0	0	0	0	0	0	YES
chr16	53683028	53686446	-	RPGRIP1L	0	0	0	0	0	0	0	0	0	YES
chr16	55583315	55584860	+	LPCAT2	0	0	0	0	0	0	0	0	0	YES
chr16	55613157	55616825	+	LPCAT2	0	0	0	0	0	0	0	0	-0.47	YES
chr16	56438954	56439115	-	AMFR	0	0	0	0	0	0	0	0	0	YES
chr16	56534938	56535264	-	BBS2	0	0	0	0	0	0	0	0	-1.44	YES
chr16	56539949	56540031	-	BBS2	0	0	0	0	0	0	0	0	0	YES
chr16	57088753	57088943	+	NLRC5	0	0	0	0	0	0	0	0	0	YES
chr16	57153191	57153472	+	CPNE2	0	0	0	0	0	0	0	0	0	YES
chr16	57507408	57507524	-	DOK4	0	0	0	0	0	0	0	0	8.10667	YES
chr16	57507952	57508704	-	DOK4	0	0	0	0	0	0	0	0	-0.396667	YES
chr16	57508895	57509011	-	DOK4	0	0	0	0	0	0	0	0	-0.513333	YES
chr16	57509132	57509417	-	DOK4	0	0	0	0	0	0	0	0	0	YES
chr16	57552654	57554979	-	CCDC102A	0	0	0	0	0	0	0	0	-0.4	YES
chr16	57555089	57559812	-	CCDC102A	0	0	0	0	0	0	0	0	0	YES
chr16	58077265	58077415	+	MMP15	0	0	0	0	0	0	0	0	-0.113333	YES
chr16	66551119	66551691	-	TK2	0	0	0	0	0	0	0	0	0	YES
chr16	66975126	66975408	+	CES2	0	0	0	0	0	0	0	0	0	YES
chr16	67188863	67188998	-	TRADD	0	0	0	0	0	0	0	0	0.0966667	YES
chr16	67202840	67202938	+	HSF4	0	0	0	0	0	0	0	0	0	YES
chr16	67266098	67267559	-	FHOD1	0	0	0	0	0	0	0	0	-0.613333	YES
chr16	67268171	67268259	-	FHOD1	0	0	0	0	0	0	0	0	0.236667	YES
chr16	67271672	67271936	-	FHOD1	0	0	0	0	0	0	0	0	0.3	YES
chr16	67318361	67318615	+	PLEKHG4	0	0	0	0	0	0	0	0	0.706667	YES
chr16	67320267	67320347	+	PLEKHG4	0	0	0	0	0	0	0	0	-0.37	YES
chr16	67321081	67321800	+	PLEKHG4	0	0	0	0	0	0	0	0	0.793333	YES
chr16	67469744	67469859	+	HSD11B2	0	0	0	0	0	0	0	0	2.75667	YES
chr16	67470046	67470151	+	HSD11B2	0	0	0	0	0	0	0	0	-0.0733333	YES
chr16	67575686	67575769	+	FAM65A	0	0	0	0	0	0	0	0	0.09	YES
chr16	67579764	67579851	+	FAM65A	0	0	0	0	0	0	0	0	-0.0733333	YES
chr16	67700169	67700260	-	C16orf48	0	0	0	0	0	0	0	0	2.68667	YES
chr16	67911560	67911643	+	EDC4	0	0	0	0	0	0	0	0	-1.05667	YES
chr16	67915084	67915167	+	EDC4	0	0	0	0	0	0	0	0	-0.08	YES
chr16	67991700	67991800	-	SLC12A4	0	0	0	0	0	0	0	0	0.15	YES
chr16	68909194	68912020	+	TMCO7	0	0	0	0	0	0	0	0	0	YES
chr16	68961987	68964140	+	TMCO7	0	0	0	0	0	0	0	0	0	YES
chr16	70358591	70359476	+	DDX19B	0	0	0	0	0	0	0	0	0.0333333	YES
chr16	70416828	70417092	-	ST3GAL2	0	0	0	0	0	0	0	0	0.383333	YES
chr16	70497176	70497525	+	FUK	0	0	0	0	0	0	0	0	0	YES
chr16	70713781	70713873	-	MTSS1L	0	0	0	0	0	0	0	0	0	YES
chr16	72055211	72056260	+	DHODH	0	0	0	0	0	0	0	0	2.08	YES
chr16	72134497	72134984	+	DHX38	0	0	0	0	0	0	0	0	-0.05	YES
chr16	74982455	74983615	-	WDR59	0	0	0	0	0	0	0	0	0	YES
chr16	75445851	75446432	-	CFDP1	0	0	0	0	0	0	0	0	0	YES
chr16	75654233	75654528	-	ADAT1	0	0	0	0	0	0	0	0	0	YES
chr16	83991344	83992864	+	OSGIN1	0	0	0	0	0	0	0	0	-0.513333	YES
chr16	88599118	88599196	+	ZFPM1	0	0	0	0	0	0	0	0	-3.12333	YES
chr16	88599344	88599555	+	ZFPM1	0	0	0	0	0	0	0	0	-3.89333	YES
chr16	88902258	88902608	-	GALNS	0	0	0	0	0	0	0	0	-0.203333	YES
chr16	88926159	88926300	+	TRAPPC2L	0	0	0	0	0	0	0	0	-0.17	YES
chr16	89775844	89776184	-	C16orf7	0	0	0	0	0	0	0	0	-2.10667	YES
chr16	89778378	89778454	-	C16orf7	0	0	0	0	0	0	0	0	7.09333	YES
chr16	89778931	89779012	-	C16orf7	0	0	0	0	0	0	0	0	6.08	YES
chr16	89871801	89874701	-	FANCA	0	0	0	0	0	0	0	0	-0.383333	YES
chr16	89930019	89930201	+	SPIRE2	0	0	0	0	0	0	0	0	-0.606667	YES
chr16	90030719	90030873	+	DEF8	0	0	0	0	0	0	0	0	-0.433333	YES
chr17	909410	910404	-	ABR	0	0	0	0	0	0	0	0	13.8767	YES
chr17	953422	953776	-	ABR	0	0	0	0	0	0	0	0	0.366667	YES
chr17	960343	961209	-	ABR	0	0	0	0	0	0	0	0	0	YES
chr17	1371205	1371281	-	MYO1C	0	0	0	0	0	0	0	0	-0.15	YES
chr17	1378153	1378231	-	MYO1C	0	0	0	0	0	0	0	0	-0.193333	YES
chr17	1480015	1481543	-	SLC43A2	0	0	0	0	0	0	0	0	0	YES
chr17	1551252	1551643	-	RILP	0	0	0	0	0	0	0	0	-0.25	YES
chr17	1551790	1552092	-	RILP	0	0	0	0	0	0	0	0	-2.10333	YES
chr17	1552800	1552870	-	RILP	0	0	0	0	0	0	0	0	-6.40333	YES
chr17	1554848	1554941	-	PRPF8	0	0	0	0	0	0	0	0	-0.05	YES
chr17	2186154	2186918	-	SMG6	0	0	0	0	0	0	0	0	0	YES
chr17	2568751	2569309	+	PAFAH1B1	0	0	0	0	0	0	0	0	0	YES
chr17	3917483	3917640	-	ZZEF1	0	0	0	0	0	0	0	0	0.0433333	YES
chr17	3978473	3978556	-	ZZEF1	0	0	0	0	0	0	0	0	0	YES
chr17	3980054	3980161	-	ZZEF1	0	0	0	0	0	0	0	0	0	YES
chr17	4623595	4623687	+	ARRB2	0	0	0	0	0	0	0	0	-0.596667	YES
chr17	4638804	4641702	-	CXCL16	0	0	0	0	0	0	0	0	-0.246667	YES
chr17	4718882	4719058	+	PLD2	0	0	0	0	0	0	0	0	-1.23333	YES
chr17	4876287	4876469	-	CAMTA2	0	0	0	0	0	0	0	0	2.16667	YES
chr17	7094134	7094585	-	DLG4	0	0	0	0	0	0	0	0	0	YES
chr17	7130855	7130973	-	DVL2	0	0	0	0	0	0	0	0	0.03	YES
chr17	7226186	7226266	-	NEURL4	0	0	0	0	0	0	0	0	1.43333	YES
chr17	7226883	7226965	-	NEURL4	0	0	0	0	0	0	0	0	0.563333	YES
chr17	7227043	7227132	-	NEURL4	0	0	0	0	0	0	0	0	0.316667	YES
chr17	7286936	7287027	+	TNK1	0	0	0	0	0	0	0	0	-1.39333	YES
chr17	7292203	7292289	+	TNK1	0	0	0	0	0	0	0	0	-0.1	YES
chr17	7318168	7318274	+	NLGN2	0	0	0	0	0	0	0	0	0.91	YES
chr17	7339405	7339512	+	TMEM102	0	0	0	0	0	0	0	0	1.27333	YES
chr17	7414639	7414724	+	POLR2A	0	0	0	0	0	0	0	0	0.04	YES
chr17	7463806	7464040	+	TNFSF13	0	0	0	0	0	0	0	0	-6.99	YES
chr17	7578290	7578370	-	TP53	0	0	0	0	0	0	0	0	0.573333	YES
chr17	7749616	7749717	+	KDM6B	0	0	0	0	0	0	0	0	0	YES
chr17	8050700	8050787	-	PER1	0	0	0	0	0	0	0	0	-0.77	YES
chr17	8053195	8053288	-	PER1	0	0	0	0	0	0	0	0	-0.0833333	YES
chr17	8166312	8166426	+	PFAS	0	0	0	0	0	0	0	0	0	YES
chr17	8422110	8422198	-	MYH10	0	0	0	0	0	0	0	0	-0.0866667	YES
chr17	8424318	8424409	-	MYH10	0	0	0	0	0	0	0	0	0.126667	YES
chr17	9763419	9764455	+	GLP2R	0	0	0	0	0	0	0	0	0.11	YES
chr17	17931692	17931928	-	ATPAF2	0	0	0	0	0	0	0	0	0	YES
chr17	18137251	18137326	+	LLGL1	0	0	0	0	0	0	0	0	-0.523333	YES
chr17	18284315	18284680	+	EVPLL	0	0	0	0	0	0	0	0	0	YES
chr17	18872471	18872654	+	SLC5A10	0	0	0	0	0	0	0	0	0	YES
chr17	18872736	18874325	+	SLC5A10	0	0	0	0	0	0	0	0	0	YES
chr17	19463610	19463730	+	SLC47A1	0	0	0	0	0	0	0	0	0.413333	YES
chr17	19641549	19641635	-	ALDH3A1	0	0	0	0	0	0	0	0	0.87	YES
chr17	19642409	19642820	-	ALDH3A1	0	0	0	0	0	0	0	0	0.513333	YES
chr17	19644524	19645316	-	ALDH3A1	0	0	0	0	0	0	0	0	0.506667	YES
chr17	26900640	26900752	-	ALDOC	0	0	0	0	0	0	0	0	-0.27	YES
chr17	26900953	26901084	-	ALDOC	0	0	0	0	0	0	0	0	-1.04	YES
chr17	26901596	26901713	-	ALDOC	0	0	0	0	0	0	0	0	0	YES
chr17	26902025	26902140	-	ALDOC	0	0	0	0	0	0	0	0	0	YES
chr17	26902353	26902438	-	ALDOC	0	0	0	0	0	0	0	0	0.236667	YES
chr17	26958700	26958837	-	KIAA0100	0	0	0	0	0	0	0	0	-0.0633333	YES
chr17	27183410	27183522	+	ERAL1	0	0	0	0	0	0	0	0	0.143333	YES
chr17	27229720	27229835	-	DHRS13	0	0	0	0	0	0	0	0	0.393333	YES
chr17	27421869	27421953	-	MYO18A	0	0	0	0	0	0	0	0	0.276667	YES
chr17	27448742	27448868	-	MYO18A	0	0	0	0	0	0	0	0	0	YES
chr17	27994014	27994147	-	SSH2	0	0	0	0	0	0	0	0	0	YES
chr17	29195431	29196265	+	ATAD5	0	0	0	0	0	0	0	0	0.00333333	YES
chr17	29196409	29196513	+	ATAD5	0	0	0	0	0	0	0	0	-1.56667	YES
chr17	29221741	29221852	+	ATAD5	0	0	0	0	0	0	0	0	-0.18	YES
chr17	29249127	29249957	+	ADAP2	0	0	0	0	0	0	0	0	0	YES
chr17	29258987	29261202	+	ADAP2	0	0	0	0	0	0	0	0	0	YES
chr17	29664601	29664836	+	NF1	0	0	0	0	0	0	0	0	0.15	YES
chr17	30202433	30205268	-	UTP6	0	0	0	0	0	0	0	0	-0.0733333	YES
chr17	30205347	30205720	-	UTP6	0	0	0	0	0	0	0	0	0.0233333	YES
chr17	30205801	30207591	-	UTP6	0	0	0	0	0	0	0	0	-0.81	YES
chr17	30207774	30211442	-	UTP6	0	0	0	0	0	0	0	0	0	YES
chr17	30211525	30212998	-	UTP6	0	0	0	0	0	0	0	0	0	YES
chr17	30980966	30981494	-	MYO1D	0	0	0	0	0	0	0	0	0	YES
chr17	30981640	30986132	-	MYO1D	0	0	0	0	0	0	0	0	0	YES
chr17	31105592	31107593	-	MYO1D	0	0	0	0	0	0	0	0	0	YES
chr17	34842630	34842778	+	ZNHIT3	0	0	0	0	0	0	0	0	-0.07	YES
chr17	36619438	36619568	+	ARHGAP23	0	0	0	0	0	0	0	0	0.613333	YES
chr17	36708831	36708960	-	SRCIN1	0	0	0	0	0	0	0	0	0	YES
chr17	37829120	37829303	-	PGAP3	0	0	0	0	0	0	0	0	1.66333	YES
chr17	37871613	37871698	+	ERBB2	0	0	0	0	0	0	0	0	0.236667	YES
chr17	37881165	37881301	+	ERBB2	0	0	0	0	0	0	0	0	0.373333	YES
chr17	37886545	37886659	-	C17orf37	0	0	0	0	0	0	0	0	-2.51	YES
chr17	38178738	38178897	-	MED24	0	0	0	0	0	0	0	0	0	YES
chr17	38183000	38183108	-	MED24	0	0	0	0	0	0	0	0	-0.943333	YES
chr17	39882150	39883304	-	HAP1	0	0	0	0	0	0	0	0	0	YES
chr17	40342922	40343035	-	GHDC	0	0	0	0	0	0	0	0	-0.276667	YES
chr17	40705310	40705456	+	HSD17B1	0	0	0	0	0	0	0	0	-0.983333	YES
chr17	40705637	40705811	+	HSD17B1	0	0	0	0	0	0	0	0	-1.71333	YES
chr17	40706601	40706686	+	HSD17B1	0	0	0	0	0	0	0	0	-3.73333	YES
chr17	41108578	41109154	-	AARSD1	0	0	0	0	0	0	0	0	-0.01	YES
chr17	41958718	41958825	-	MPP2	0	0	0	0	0	0	0	0	1.3	YES
chr17	42160041	42160132	-	HDAC5	0	0	0	0	0	0	0	0	2.74667	YES
chr17	42429617	42429708	+	GRN	0	0	0	0	0	0	0	0	-0.07	YES
chr17	42432560	42433082	-	FAM171A2	0	0	0	0	0	0	0	0	0	YES
chr17	42433721	42433797	-	FAM171A2	0	0	0	0	0	0	0	0	-1.09667	YES
chr17	42852680	42852761	+	ADAM11	0	0	0	0	0	0	0	0	1.63333	YES
chr17	43213988	43214058	+	ACBD4	0	0	0	0	0	0	0	0	5.72667	YES
chr17	43240003	43240116	+	HEXIM2	0	0	0	0	0	0	0	0	-0.743333	YES
chr17	43322267	43322345	+	FMNL1	0	0	0	0	0	0	0	0	-1.57333	YES
chr17	43364412	43364519	-	MAP3K14	0	0	0	0	0	0	0	0	-0.333333	YES
chr17	45776862	45777001	+	TBKBP1	0	0	0	0	0	0	0	0	0.263333	YES
chr17	48263010	48263138	-	COL1A1	0	0	0	0	0	0	0	0	0.996667	YES
chr17	48263869	48264000	-	COL1A1	0	0	0	0	0	0	0	0	-0.476667	YES
chr17	48264284	48264375	-	COL1A1	0	0	0	0	0	0	0	0	-2.08667	YES
chr17	48266637	48266737	-	COL1A1	0	0	0	0	0	0	0	0	-0.726667	YES
chr17	48266900	48267039	-	COL1A1	0	0	0	0	0	0	0	0	-0.756667	YES
chr17	48267274	48267361	-	COL1A1	0	0	0	0	0	0	0	0	0.853333	YES
chr17	48269248	48269340	-	COL1A1	0	0	0	0	0	0	0	0	-0.466667	YES
chr17	48269386	48269835	-	COL1A1	0	0	0	0	0	0	0	0	1.78333	YES
chr17	48269890	48270000	-	COL1A1	0	0	0	0	0	0	0	0	0	YES
chr17	48270212	48270354	-	COL1A1	0	0	0	0	0	0	0	0	0	YES
chr17	48271545	48271709	-	COL1A1	0	0	0	0	0	0	0	0	0	YES
chr17	48271809	48271933	-	COL1A1	0	0	0	0	0	0	0	0	0	YES
chr17	48271988	48272081	-	COL1A1	0	0	0	0	0	0	0	0	0.496667	YES
chr17	48272462	48272592	-	COL1A1	0	0	0	0	0	0	0	0	-1.09	YES
chr17	48272692	48272794	-	COL1A1	0	0	0	0	0	0	0	0	0	YES
chr17	48273561	48273674	-	COL1A1	0	0	0	0	0	0	0	0	0	YES
chr17	48273729	48273844	-	COL1A1	0	0	0	0	0	0	0	0	0.953333	YES
chr17	48273890	48273977	-	COL1A1	0	0	0	0	0	0	0	0	0.74	YES
chr17	48274425	48274540	-	COL1A1	0	0	0	0	0	0	0	0	0	YES
chr17	48549941	48551025	+	ACSF2	0	0	0	0	0	0	0	0	-1.96333	YES
chr17	48551168	48551254	+	ACSF2	0	0	0	0	0	0	0	0	0.793333	YES
chr17	48551629	48551862	+	ACSF2	0	0	0	0	0	0	0	0	0	YES
chr17	48626326	48626403	+	SPATA20	0	0	0	0	0	0	0	0	0	YES
chr17	48626548	48626646	+	SPATA20	0	0	0	0	0	0	0	0	0.31	YES
chr17	48632674	48632852	+	SPATA20	0	0	0	0	0	0	0	0	0	YES
chr17	53063053	53063502	+	STXBP4	0	0	0	0	0	0	0	0	0	YES
chr17	55918414	55918543	-	MRPS23	0	0	0	0	0	0	0	0	-0.0266667	YES
chr17	56283532	56283643	-	MKS1	0	0	0	0	0	0	0	0	-0.746667	YES
chr17	56285363	56285465	-	MKS1	0	0	0	0	0	0	0	0	-0.896667	YES
chr17	56285945	56288019	-	MKS1	0	0	0	0	0	0	0	0	-0.423333	YES
chr17	56581260	56581410	-	MTMR4	0	0	0	0	0	0	0	0	0.653333	YES
chr17	56581582	56581663	-	MTMR4	0	0	0	0	0	0	0	0	-0.336667	YES
chr17	56582945	56584103	-	MTMR4	0	0	0	0	0	0	0	0	-0.67	YES
chr17	56585926	56586041	-	MTMR4	0	0	0	0	0	0	0	0	0	YES
chr17	56588873	56589750	-	MTMR4	0	0	0	0	0	0	0	0	0	YES
chr17	57274965	57275053	+	PRR11	0	0	0	0	0	0	0	0	0	YES
chr17	59974945	59975028	-	INTS2	0	0	0	0	0	0	0	0	1.21	YES
chr17	61914405	61914554	-	SMARCD2	0	0	0	0	0	0	0	0	0.866667	YES
chr17	64683386	64684419	+	PRKCA	0	0	0	0	0	0	0	0	0	YES
chr17	66519958	66520156	+	PRKAR1A	0	0	0	0	0	0	0	0	0.03	YES
chr17	66878122	66878739	-	ABCA8	0	0	0	0	0	0	0	0	0	YES
chr17	66899021	66899441	-	ABCA8	0	0	0	0	0	0	0	0	0	YES
chr17	70645101	70645308	-	SLC39A11	0	0	0	0	0	0	0	0	-1.15	YES
chr17	72954859	72955005	-	C17orf28	0	0	0	0	0	0	0	0	1.33333	YES
chr17	72956033	72956120	-	C17orf28	0	0	0	0	0	0	0	0	0	YES
chr17	72958085	72958328	-	C17orf28	0	0	0	0	0	0	0	0	-2.22333	YES
chr17	72960006	72960577	-	C17orf28	0	0	0	0	0	0	0	0	0.653333	YES
chr17	72995712	72997435	+	CDR2L	0	0	0	0	0	0	0	0	0	YES
chr17	73016491	73016582	+	ICT1	0	0	0	0	0	0	0	0	-0.77	YES
chr17	73016753	73017015	+	ICT1	0	0	0	0	0	0	0	0	-0.0466667	YES
chr17	73263049	73263618	-	MIF4GD	0	0	0	0	0	0	0	0	2.32667	YES
chr17	73490890	73490976	+	KIAA0195	0	0	0	0	0	0	0	0	0	YES
chr17	73494405	73494524	+	KIAA0195	0	0	0	0	0	0	0	0	-0.233333	YES
chr17	73559260	73559411	+	LLGL2	0	0	0	0	0	0	0	0	-0.0466667	YES
chr17	73627330	73627529	-	RECQL5	0	0	0	0	0	0	0	0	0.91	YES
chr17	73752699	73752784	+	ITGB4	0	0	0	0	0	0	0	0	-0.463333	YES
chr17	73753189	73753280	+	ITGB4	0	0	0	0	0	0	0	0	-0.683333	YES
chr17	73842869	73842988	-	WBP2	0	0	0	0	0	0	0	0	0.11	YES
chr17	73949702	73951646	-	ACOX1	0	0	0	0	0	0	0	0	0	YES
chr17	74007964	74008086	-	EVPL	0	0	0	0	0	0	0	0	0.653333	YES
chr17	74078131	74078543	+	ZACN	0	0	0	0	0	0	0	0	0	YES
chr17	74470617	74470811	-	RHBDF2	0	0	0	0	0	0	0	0	-1.05667	YES
chr17	74738131	74738258	+	MFSD11	0	0	0	0	0	0	0	0	0	YES
chr17	74936631	74936813	+	MGAT5B	0	0	0	0	0	0	0	0	0	YES
chr17	76109293	76109628	-	TMC6	0	0	0	0	0	0	0	0	0	YES
chr17	76122448	76122604	-	TMC6	0	0	0	0	0	0	0	0	0	YES
chr17	76482216	76482305	-	DNAH17	0	0	0	0	0	0	0	0	1.42	YES
chr17	76491180	76491956	-	DNAH17	0	0	0	0	0	0	0	0	0	YES
chr17	76492115	76495089	-	DNAH17	0	0	0	0	0	0	0	0	2.65333	YES
chr17	77752107	77752182	+	CBX2	0	0	0	0	0	0	0	0	1.20333	YES
chr17	78082407	78082495	+	GAA	0	0	0	0	0	0	0	0	0.4	YES
chr17	78084640	78084739	+	GAA	0	0	0	0	0	0	0	0	0	YES
chr17	78280269	78280927	+	RNF213	0	0	0	0	0	0	0	0	0	YES
chr17	78311527	78311632	+	RNF213	0	0	0	0	0	0	0	0	0.4	YES
chr17	78341649	78341760	+	RNF213	0	0	0	0	0	0	0	0	-0.813333	YES
chr17	78343472	78343567	+	RNF213	0	0	0	0	0	0	0	0	0.5	YES
chr17	78363718	78363811	+	RNF213	0	0	0	0	0	0	0	0	-1.07667	YES
chr17	78970873	78971060	+	CHMP6	0	0	0	0	0	0	0	0	0	YES
chr17	79164603	79164706	-	AZI1	0	0	0	0	0	0	0	0	0	YES
chr17	79164885	79164992	-	AZI1	0	0	0	0	0	0	0	0	0.36	YES
chr17	79173350	79173518	-	AZI1	0	0	0	0	0	0	0	0	-0.0333333	YES
chr17	79207304	79207437	-	C17orf56	0	0	0	0	0	0	0	0	-0.21	YES
chr17	79781188	79781287	-	FAM195B	0	0	0	0	0	0	0	0	-0.516667	YES
chr17	79974990	79975184	+	ASPSCR1	0	0	0	0	0	0	0	0	-0.913333	YES
chr17	79982640	79982875	+	LRRC45	0	0	0	0	0	0	0	0	-0.403333	YES
chr17	79988343	79988484	+	LRRC45	0	0	0	0	0	0	0	0	0.363333	YES
chr17	79994640	79994734	-	DCXR	0	0	0	0	0	0	0	0	-0.33	YES
chr17	80361967	80363199	-	C17orf101	0	0	0	0	0	0	0	0	0.373333	YES
chr17	80616011	80616366	-	RAB40B	0	0	0	0	0	0	0	0	0.663333	YES
chr17	80684479	80684708	+	FN3KRP	0	0	0	0	0	0	0	0	-0.0933333	YES
chr17	81006447	81006544	-	B3GNTL1	0	0	0	0	0	0	0	0	0	YES
chr18	5292204	5293242	-	ZFP161	0	0	0	0	0	0	0	0	1.15	YES
chr18	6890085	6890428	+	ARHGAP28	0	0	0	0	0	0	0	0	0	YES
chr18	9584579	9584718	-	PPP4R1	0	0	0	0	0	0	0	0	-0.11	YES
chr18	10714929	10715647	-	FAM38B	0	0	0	0	0	0	0	0	0	YES
chr18	11753682	11753824	+	GNAL	0	0	0	0	0	0	0	0	0	YES
chr18	12427111	12427219	+	SLMO1	0	0	0	0	0	0	0	0	0.14	YES
chr18	13068237	13068357	+	CEP192	0	0	0	0	0	0	0	0	0	YES
chr18	18548822	18549075	-	ROCK1	0	0	0	0	0	0	0	0	0	YES
chr18	18963637	18964166	+	GREB1L	0	0	0	0	0	0	0	0	0	YES
chr18	19085529	19085770	+	GREB1L	0	0	0	0	0	0	0	0	0.343333	YES
chr18	21110097	21110192	+	C18orf8	0	0	0	0	0	0	0	0	-2.19	YES
chr18	21892071	21894212	-	OSBPL1A	0	0	0	0	0	0	0	0	0	YES
chr18	28602469	28604314	-	DSC3	0	0	0	0	0	0	0	0	0	YES
chr18	28605882	28609474	-	DSC3	0	0	0	0	0	0	0	0	0	YES
chr18	28649118	28650691	-	DSC2	0	0	0	0	0	0	0	0	0	YES
chr18	28659956	28660061	-	DSC2	0	0	0	0	0	0	0	0	0	YES
chr18	28662390	28662891	-	DSC2	0	0	0	0	0	0	0	0	0	YES
chr18	29115376	29116164	+	DSG2	0	0	0	0	0	0	0	0	0	YES
chr18	33734963	33736428	+	ELP2	0	0	0	0	0	0	0	0	0	YES
chr18	43528543	43529449	-	KIAA1632	0	0	0	0	0	0	0	0	0	YES
chr18	43571950	43572071	-	PSTPIP2	0	0	0	0	0	0	0	0	-0.456667	YES
chr18	43572169	43573570	-	PSTPIP2	0	0	0	0	0	0	0	0	0	YES
chr18	44435399	44435527	-	PIAS2	0	0	0	0	0	0	0	0	0	YES
chr18	47008781	47009953	-	C18orf32	0	0	0	0	0	0	0	0	0.156667	YES
chr18	47429204	47431041	-	MYO5B	0	0	0	0	0	0	0	0	0	YES
chr18	47516891	47518657	-	MYO5B	0	0	0	0	0	0	0	0	0	YES
chr18	47799109	47799193	-	MBD1	0	0	0	0	0	0	0	0	-0.483333	YES
chr18	48447129	48447443	+	ME2	0	0	0	0	0	0	0	0	0.136667	YES
chr18	52602180	52604063	-	CCDC68	0	0	0	0	0	0	0	0	0	YES
chr18	52608315	52609905	-	CCDC68	0	0	0	0	0	0	0	0	0	YES
chr18	54339906	54346562	+	WDR7	0	0	0	0	0	0	0	0	0	YES
chr18	54348623	54349909	+	WDR7	0	0	0	0	0	0	0	0	0	YES
chr18	54353264	54354085	+	WDR7	0	0	0	0	0	0	0	0	0	YES
chr18	54362430	54363472	+	WDR7	0	0	0	0	0	0	0	0	-1.23333	YES
chr18	59774115	59774218	-	PIGN	0	0	0	0	0	0	0	0	-0.816667	YES
chr18	60231869	60232234	+	ZCCHC2	0	0	0	0	0	0	0	0	0	YES
chr18	61647173	61648954	+	SERPINB8	0	0	0	0	0	0	0	0	0	YES
chr18	61649073	61650812	+	SERPINB8	0	0	0	0	0	0	0	0	0	YES
chr18	66351481	66351664	-	TMX3	0	0	0	0	0	0	0	0	0	YES
chr18	77105573	77105774	+	ATP9B	0	0	0	0	0	0	0	0	0	YES
chr18	77477677	77477809	+	CTDP1	0	0	0	0	0	0	0	0	0	YES
chr19	282311	282751	-	PPAP2C	0	0	0	0	0	0	0	0	0.07	YES
chr19	311940	312190	-	MIER2	0	0	0	0	0	0	0	0	0.22	YES
chr19	966869	968404	+	ARID3A	0	0	0	0	0	0	0	0	0	YES
chr19	1051294	1051447	+	ABCA7	0	0	0	0	0	0	0	0	0.71	YES
chr19	1051586	1051940	+	ABCA7	0	0	0	0	0	0	0	0	-0.673333	YES
chr19	1052126	1052212	+	ABCA7	0	0	0	0	0	0	0	0	-0.496667	YES
chr19	1054110	1054191	+	ABCA7	0	0	0	0	0	0	0	0	-0.0366667	YES
chr19	1079840	1079926	+	HMHA1	0	0	0	0	0	0	0	0	0.2	YES
chr19	1080547	1080680	+	HMHA1	0	0	0	0	0	0	0	0	0	YES
chr19	1081738	1081822	+	HMHA1	0	0	0	0	0	0	0	0	-2.06333	YES
chr19	1456153	1456304	+	APC2	0	0	0	0	0	0	0	0	5.71	YES
chr19	1460857	1461035	+	APC2	0	0	0	0	0	0	0	0	-0.366667	YES
chr19	1495387	1495467	+	REEP6	0	0	0	0	0	0	0	0	0.816667	YES
chr19	1816154	1816223	-	REXO1	0	0	0	0	0	0	0	0	-1.52667	YES
chr19	1986976	1987164	-	BTBD2	0	0	0	0	0	0	0	0	0.713333	YES
chr19	2193783	2194513	+	DOT1L	0	0	0	0	0	0	0	0	0	YES
chr19	2234061	2234148	-	PLEKHJ1	0	0	0	0	0	0	0	0	-0.886667	YES
chr19	2235990	2236153	-	PLEKHJ1	0	0	0	0	0	0	0	0	-1.27333	YES
chr19	3013817	3014567	-	TLE2	0	0	0	0	0	0	0	0	0	YES
chr19	3014613	3015650	-	TLE2	0	0	0	0	0	0	0	0	0	YES
chr19	3206025	3206149	+	NCLN	0	0	0	0	0	0	0	0	0.0466667	YES
chr19	3543472	3543552	+	C19orf71	0	0	0	0	0	0	0	0	0	YES
chr19	3543679	3543826	+	C19orf71	0	0	0	0	0	0	0	0	0	YES
chr19	3765330	3767258	+	MRPL54	0	0	0	0	0	0	0	0	-0.0666667	YES
chr19	3778421	3778506	-	MATK	0	0	0	0	0	0	0	0	0	YES
chr19	3779616	3779695	-	MATK	0	0	0	0	0	0	0	0	1.63	YES
chr19	3784238	3784335	-	MATK	0	0	0	0	0	0	0	0	-0.653333	YES
chr19	4028847	4028928	+	PIAS4	0	0	0	0	0	0	0	0	0.516667	YES
chr19	4251169	4254351	+	CCDC94	0	0	0	0	0	0	0	0	0	YES
chr19	4353027	4354041	+	MPND	0	0	0	0	0	0	0	0	0	YES
chr19	4357419	4357511	+	MPND	0	0	0	0	0	0	0	0	-1.28	YES
chr19	5144164	5144258	+	KDM4B	0	0	0	0	0	0	0	0	0	YES
chr19	5144424	5144793	+	KDM4B	0	0	0	0	0	0	0	0	0	YES
chr19	5212262	5212347	-	PTPRS	0	0	0	0	0	0	0	0	-0.196667	YES
chr19	5215424	5215508	-	PTPRS	0	0	0	0	0	0	0	0	0	YES
chr19	5220166	5220270	-	PTPRS	0	0	0	0	0	0	0	0	0	YES
chr19	6374388	6374475	+	ALKBH7	0	0	0	0	0	0	0	0	-0.173333	YES
chr19	6380702	6380914	-	GTF2F1	0	0	0	0	0	0	0	0	0.156667	YES
chr19	6416419	6416500	-	KHSRP	0	0	0	0	0	0	0	0	-0.536667	YES
chr19	6468130	6468244	-	DENND1C	0	0	0	0	0	0	0	0	4.19	YES
chr19	6468453	6468588	-	DENND1C	0	0	0	0	0	0	0	0	3.97	YES
chr19	6731123	6731209	-	GPR108	0	0	0	0	0	0	0	0	-1.17333	YES
chr19	6832212	6833194	+	VAV1	0	0	0	0	0	0	0	0	-0.546667	YES
chr19	6833297	6833538	+	VAV1	0	0	0	0	0	0	0	0	0	YES
chr19	6854110	6857064	+	VAV1	0	0	0	0	0	0	0	0	0	YES
chr19	7119595	7120630	-	INSR	0	0	0	0	0	0	0	0	0	YES
chr19	7122785	7122889	-	INSR	0	0	0	0	0	0	0	0	0	YES
chr19	7126663	7128862	-	INSR	0	0	0	0	0	0	0	0	0	YES
chr19	7534916	7535011	+	ARHGEF18	0	0	0	0	0	0	0	0	-0.203333	YES
chr19	7591493	7591646	+	MCOLN1	0	0	0	0	0	0	0	0	0	YES
chr19	7606321	7606407	+	PNPLA6	0	0	0	0	0	0	0	0	0	YES
chr19	7615316	7615402	+	PNPLA6	0	0	0	0	0	0	0	0	0	YES
chr19	7615994	7616247	+	PNPLA6	0	0	0	0	0	0	0	0	0.0266667	YES
chr19	7620254	7620492	+	PNPLA6	0	0	0	0	0	0	0	0	0	YES
chr19	7620650	7621338	+	PNPLA6	0	0	0	0	0	0	0	0	0.336667	YES
chr19	7671280	7671361	+	KIAA1543	0	0	0	0	0	0	0	0	0	YES
chr19	7687780	7688055	-	XAB2	0	0	0	0	0	0	0	0	-0.173333	YES
chr19	7688176	7688616	-	XAB2	0	0	0	0	0	0	0	0	0.146667	YES
chr19	7707005	7707088	+	STXBP2	0	0	0	0	0	0	0	0	0.153333	YES
chr19	7707220	7707314	+	STXBP2	0	0	0	0	0	0	0	0	0	YES
chr19	7707423	7707651	+	STXBP2	0	0	0	0	0	0	0	0	2.69667	YES
chr19	7709639	7710082	+	STXBP2	0	0	0	0	0	0	0	0	-0.79	YES
chr19	7916464	7916566	+	EVI5L	0	0	0	0	0	0	0	0	0	YES
chr19	7918070	7918158	+	EVI5L	0	0	0	0	0	0	0	0	0.68	YES
chr19	7926905	7927007	+	EVI5L	0	0	0	0	0	0	0	0	0	YES
chr19	7927164	7927273	+	EVI5L	0	0	0	0	0	0	0	0	0	YES
chr19	7927421	7927857	+	EVI5L	0	0	0	0	0	0	0	0	0	YES
chr19	7927954	7928070	+	EVI5L	0	0	0	0	0	0	0	0	-1.23333	YES
chr19	8319501	8320490	+	LASS4	0	0	0	0	0	0	0	0	0	YES
chr19	8320610	8320705	+	LASS4	0	0	0	0	0	0	0	0	0	YES
chr19	8321595	8321832	+	LASS4	0	0	0	0	0	0	0	0	1.85333	YES
chr19	8576421	8576500	-	ZNF414	0	0	0	0	0	0	0	0	-2.02	YES
chr19	10197125	10197604	+	C19orf66	0	0	0	0	0	0	0	0	0	YES
chr19	10200724	10201925	+	C19orf66	0	0	0	0	0	0	0	0	-0.546667	YES
chr19	10363140	10363226	+	MRPL4	0	0	0	0	0	0	0	0	-0.21	YES
chr19	10421319	10421528	-	FDX1L	0	0	0	0	0	0	0	0	-0.12	YES
chr19	10433951	10434050	-	RAVER1	0	0	0	0	0	0	0	0	0.686667	YES
chr19	10445085	10445203	-	ICAM3	0	0	0	0	0	0	0	0	2.15	YES
chr19	10472858	10472939	-	TYK2	0	0	0	0	0	0	0	0	-0.106667	YES
chr19	10503834	10503934	-	CDC37	0	0	0	0	0	0	0	0	-0.07	YES
chr19	10597495	10599867	-	KEAP1	0	0	0	0	0	0	0	0	0	YES
chr19	10655543	10655632	+	ATG4D	0	0	0	0	0	0	0	0	-0.86	YES
chr19	10662652	10662720	+	ATG4D	0	0	0	0	0	0	0	0	1.38	YES
chr19	10662798	10662880	+	ATG4D	0	0	0	0	0	0	0	0	0.41	YES
chr19	10741818	10741950	+	SLC44A2	0	0	0	0	0	0	0	0	0	YES
chr19	10742062	10742150	+	SLC44A2	0	0	0	0	0	0	0	0	0	YES
chr19	10742628	10742719	+	SLC44A2	0	0	0	0	0	0	0	0	0	YES
chr19	10742833	10745431	+	SLC44A2	0	0	0	0	0	0	0	0	0	YES
chr19	10748424	10748531	+	SLC44A2	0	0	0	0	0	0	0	0	0	YES
chr19	10748606	10748698	+	SLC44A2	0	0	0	0	0	0	0	0	0.29	YES
chr19	10748770	10748902	+	SLC44A2	0	0	0	0	0	0	0	0	-0.133333	YES
chr19	10823544	10823628	+	QTRT1	0	0	0	0	0	0	0	0	1.36333	YES
chr19	11031623	11031725	+	CARM1	0	0	0	0	0	0	0	0	-0.53	YES
chr19	11446248	11446340	-	RAB3D	0	0	0	0	0	0	0	0	0	YES
chr19	11515908	11515998	-	RGL3	0	0	0	0	0	0	0	0	-0.853333	YES
chr19	11548793	11548887	+	PRKCSH	0	0	0	0	0	0	0	0	-0.0566667	YES
chr19	11559991	11560080	+	PRKCSH	0	0	0	0	0	0	0	0	-0.0366667	YES
chr19	11596586	11597583	-	ZNF653	0	0	0	0	0	0	0	0	0	YES
chr19	12058123	12058328	+	ZNF700	0	0	0	0	0	0	0	0	0	YES
chr19	12767871	12768259	-	MAN2B1	0	0	0	0	0	0	0	0	0	YES
chr19	12768370	12768876	-	MAN2B1	0	0	0	0	0	0	0	0	-0.18	YES
chr19	12800252	12800354	-	FBXW9	0	0	0	0	0	0	0	0	0	YES
chr19	12876829	12876916	-	HOOK2	0	0	0	0	0	0	0	0	0.776667	YES
chr19	12885556	12885625	-	HOOK2	0	0	0	0	0	0	0	0	-2.91	YES
chr19	12962850	12962928	+	MAST1	0	0	0	0	0	0	0	0	-1.15333	YES
chr19	13002789	13002929	+	GCDH	0	0	0	0	0	0	0	0	-0.346667	YES
chr19	13865157	13867010	+	CCDC130	0	0	0	0	0	0	0	0	-0.606667	YES
chr19	13919799	13919883	+	ZSWIM4	0	0	0	0	0	0	0	0	0	YES
chr19	14029390	14029558	+	CC2D1A	0	0	0	0	0	0	0	0	0	YES
chr19	14037686	14037790	+	CC2D1A	0	0	0	0	0	0	0	0	-0.143333	YES
chr19	14073852	14073933	-	RFX1	0	0	0	0	0	0	0	0	-2.48667	YES
chr19	14077343	14077444	-	RFX1	0	0	0	0	0	0	0	0	0	YES
chr19	14150723	14153264	+	IL27RA	0	0	0	0	0	0	0	0	-0.136667	YES
chr19	14157150	14157241	+	IL27RA	0	0	0	0	0	0	0	0	0.346667	YES
chr19	14159895	14159967	+	IL27RA	0	0	0	0	0	0	0	0	-0.153333	YES
chr19	14161696	14162418	+	IL27RA	0	0	0	0	0	0	0	0	-0.173333	YES
chr19	14162513	14162691	+	IL27RA	0	0	0	0	0	0	0	0	-0.343333	YES
chr19	14167326	14167473	-	PALM3	0	0	0	0	0	0	0	0	-3.32333	YES
chr19	14208296	14208390	-	PRKACA	0	0	0	0	0	0	0	0	0.0733333	YES
chr19	14568953	14569043	+	PKN1	0	0	0	0	0	0	0	0	-0.133333	YES
chr19	14578454	14578529	+	PKN1	0	0	0	0	0	0	0	0	-0.28	YES
chr19	15230327	15230792	-	ILVBL	0	0	0	0	0	0	0	0	-0.103333	YES
chr19	16974608	16976220	+	SIN3B	0	0	0	0	0	0	0	0	0.01	YES
chr19	17326880	17326977	+	USE1	0	0	0	0	0	0	0	0	-0.0366667	YES
chr19	17441061	17441160	-	ANO8	0	0	0	0	0	0	0	0	-0.103333	YES
chr19	17444364	17444498	-	ANO8	0	0	0	0	0	0	0	0	-1.34	YES
chr19	17688081	17688169	+	GLT25D1	0	0	0	0	0	0	0	0	0.11	YES
chr19	17994856	17999139	+	SLC5A5	0	0	0	0	0	0	0	0	0	YES
chr19	18707601	18707701	-	CRLF1	0	0	0	0	0	0	0	0	0	YES
chr19	18709412	18709581	-	CRLF1	0	0	0	0	0	0	0	0	0.203333	YES
chr19	18709712	18710374	-	CRLF1	0	0	0	0	0	0	0	0	0.05	YES
chr19	19033323	19033412	+	DDX49	0	0	0	0	0	0	0	0	0	YES
chr19	19042221	19042317	-	HOMER3	0	0	0	0	0	0	0	0	0.193333	YES
chr19	19049694	19049777	-	HOMER3	0	0	0	0	0	0	0	0	-0.346667	YES
chr19	19308431	19308915	+	RFXANK	0	0	0	0	0	0	0	0	-0.383333	YES
chr19	19745513	19745600	-	GMIP	0	0	0	0	0	0	0	0	0	YES
chr19	19760473	19760549	-	ATP13A1	0	0	0	0	0	0	0	0	-0.23	YES
chr19	30496360	30496557	+	C19orf2	0	0	0	0	0	0	0	0	0	YES
chr19	32873508	32873622	+	ZNF507	0	0	0	0	0	0	0	0	0.243333	YES
chr19	32949080	32949256	+	DPY19L3	0	0	0	0	0	0	0	0	0	YES
chr19	33463253	33464089	+	C19orf40	0	0	0	0	0	0	0	0	-0.68	YES
chr19	33482876	33484882	-	RHPN2	0	0	0	0	0	0	0	0	-1.96333	YES
chr19	33608948	33609915	+	GPATCH1	0	0	0	0	0	0	0	0	0	YES
chr19	33878388	33878795	-	PEPD	0	0	0	0	0	0	0	0	0.0966667	YES
chr19	35657075	35657153	+	FXYD5	0	0	0	0	0	0	0	0	-0.113333	YES
chr19	35760396	35760483	+	USF2	0	0	0	0	0	0	0	0	-2.97	YES
chr19	36033511	36033846	+	GAPDHS	0	0	0	0	0	0	0	0	0	YES
chr19	36033929	36034241	+	GAPDHS	0	0	0	0	0	0	0	0	0	YES
chr19	36034394	36034566	+	GAPDHS	0	0	0	0	0	0	0	0	0	YES
chr19	36034730	36035810	+	GAPDHS	0	0	0	0	0	0	0	0	-1.62667	YES
chr19	36035909	36035999	+	GAPDHS	0	0	0	0	0	0	0	0	0	YES
chr19	36123904	36123978	+	RBM42	0	0	0	0	0	0	0	0	-0.23	YES
chr19	36142252	36145472	+	COX6B1	0	0	0	0	0	0	0	0	0	YES
chr19	36230528	36230610	-	TMEM149	0	0	0	0	0	0	0	0	-0.983333	YES
chr19	36359686	36360568	+	APLP1	0	0	0	0	0	0	0	0	-0.483333	YES
chr19	36361931	36362138	+	APLP1	0	0	0	0	0	0	0	0	0	YES
chr19	36362252	36362513	+	APLP1	0	0	0	0	0	0	0	0	0.0166667	YES
chr19	36362648	36362759	+	APLP1	0	0	0	0	0	0	0	0	0.0633333	YES
chr19	36365772	36367418	+	APLP1	0	0	0	0	0	0	0	0	0	YES
chr19	36367519	36368619	+	APLP1	0	0	0	0	0	0	0	0	0	YES
chr19	36369557	36369791	+	APLP1	0	0	0	0	0	0	0	0	0	YES
chr19	36369855	36369975	+	APLP1	0	0	0	0	0	0	0	0	-0.26	YES
chr19	36370120	36370244	+	APLP1	0	0	0	0	0	0	0	0	-0.01	YES
chr19	36530621	36530845	-	THAP8	0	0	0	0	0	0	0	0	1.79667	YES
chr19	36605154	36605240	-	POLR2I	0	0	0	0	0	0	0	0	-0.156667	YES
chr19	38708517	38709212	-	DPF1	0	0	0	0	0	0	0	0	-0.626667	YES
chr19	39057628	39058412	+	RYR1	0	0	0	0	0	0	0	0	-0.63	YES
chr19	39062911	39063816	+	RYR1	0	0	0	0	0	0	0	0	0	YES
chr19	39063948	39066558	+	RYR1	0	0	0	0	0	0	0	0	0	YES
chr19	39066602	39068557	+	RYR1	0	0	0	0	0	0	0	0	0	YES
chr19	39068689	39068783	+	RYR1	0	0	0	0	0	0	0	0	0	YES
chr19	39070769	39071009	+	RYR1	0	0	0	0	0	0	0	0	0	YES
chr19	39071145	39075582	+	RYR1	0	0	0	0	0	0	0	0	0	YES
chr19	39076643	39076730	+	RYR1	0	0	0	0	0	0	0	0	0	YES
chr19	39372132	39374266	-	SIRT2	0	0	0	0	0	0	0	0	2.22	YES
chr19	39380386	39380494	-	SIRT2	0	0	0	0	0	0	0	0	0.236667	YES
chr19	39406547	39406676	-	SARS2	0	0	0	0	0	0	0	0	-3.53	YES
chr19	39412087	39412166	-	SARS2	0	0	0	0	0	0	0	0	-0.42	YES
chr19	39883163	39884192	+	MED29	0	0	0	0	0	0	0	0	-0.15	YES
chr19	39909467	39909556	+	PLEKHG2	0	0	0	0	0	0	0	0	-0.366667	YES
chr19	39912929	39913371	+	PLEKHG2	0	0	0	0	0	0	0	0	1.71333	YES
chr19	39964762	39964873	+	SUPT5H	0	0	0	0	0	0	0	0	-0.0266667	YES
chr19	39998259	39998469	+	DLL3	0	0	0	0	0	0	0	0	0.383333	YES
chr19	41086392	41086471	+	SHKBP1	0	0	0	0	0	0	0	0	0.316667	YES
chr19	41119945	41120220	+	LTBP4	0	0	0	0	0	0	0	0	0.393333	YES
chr19	41122927	41123005	+	LTBP4	0	0	0	0	0	0	0	0	-0.28	YES
chr19	41183327	41186821	-	NUMBL	0	0	0	0	0	0	0	0	0	YES
chr19	41206080	41206214	-	ADCK4	0	0	0	0	0	0	0	0	-0.316667	YES
chr19	41242993	41243602	+	ITPKC	0	0	0	0	0	0	0	0	0	YES
chr19	41292666	41292752	+	RAB4B	0	0	0	0	0	0	0	0	0	YES
chr19	41704528	41704613	+	CYP2S1	0	0	0	0	0	0	0	0	-0.483333	YES
chr19	41869429	41869862	-	B9D2	0	0	0	0	0	0	0	0	-0.606667	YES
chr19	41942378	41944122	-	ATP5SL	0	0	0	0	0	0	0	0	-0.763333	YES
chr19	42406809	42406933	+	ARHGEF1	0	0	0	0	0	0	0	0	0.0166667	YES
chr19	42461087	42461169	-	RABAC1	0	0	0	0	0	0	0	0	-0.553333	YES
chr19	42471916	42472936	-	ATP1A3	0	0	0	0	0	0	0	0	-0.343333	YES
chr19	42474461	42474539	-	ATP1A3	0	0	0	0	0	0	0	0	0	YES
chr19	42479950	42480567	-	ATP1A3	0	0	0	0	0	0	0	0	0	YES
chr19	42485789	42485873	-	ATP1A3	0	0	0	0	0	0	0	0	0	YES
chr19	42840499	42840958	+	MEGF8	0	0	0	0	0	0	0	0	0	YES
chr19	42848738	42848821	+	MEGF8	0	0	0	0	0	0	0	0	0.373333	YES
chr19	42858177	42858739	+	MEGF8	0	0	0	0	0	0	0	0	0	YES
chr19	42860346	42860486	+	MEGF8	0	0	0	0	0	0	0	0	0	YES
chr19	42866750	42867199	+	MEGF8	0	0	0	0	0	0	0	0	0	YES
chr19	42874512	42874852	+	MEGF8	0	0	0	0	0	0	0	0	0	YES
chr19	42891395	42891491	-	CNFN	0	0	0	0	0	0	0	0	-1.75	YES
chr19	43990849	43990931	-	PHLDB3	0	0	0	0	0	0	0	0	-0.403333	YES
chr19	43999492	43999646	-	PHLDB3	0	0	0	0	0	0	0	0	0	YES
chr19	44006024	44006252	-	PHLDB3	0	0	0	0	0	0	0	0	1.04	YES
chr19	44130154	44130275	-	CADM4	0	0	0	0	0	0	0	0	0	YES
chr19	44131071	44131317	-	CADM4	0	0	0	0	0	0	0	0	0.0933333	YES
chr19	44131471	44131795	-	CADM4	0	0	0	0	0	0	0	0	0	YES
chr19	44273713	44273870	-	KCNN4	0	0	0	0	0	0	0	0	-2.40667	YES
chr19	44676368	44677012	+	ZNF226	0	0	0	0	0	0	0	0	0.383333	YES
chr19	45262099	45262684	+	BCL3	0	0	0	0	0	0	0	0	-1.31	YES
chr19	45324080	45324172	+	BCAM	0	0	0	0	0	0	0	0	-0.43	YES
chr19	45389258	45389389	+	PVRL2	0	0	0	0	0	0	0	0	0.366667	YES
chr19	45409925	45411016	+	APOE	0	0	0	0	0	0	0	0	0	YES
chr19	45411210	45411789	+	APOE	0	0	0	0	0	0	0	0	0.236667	YES
chr19	45528679	45528863	+	RELB	0	0	0	0	0	0	0	0	-0.373333	YES
chr19	45536008	45537501	+	RELB	0	0	0	0	0	0	0	0	-0.41	YES
chr19	45668229	45668384	-	TRAPPC6A	0	0	0	0	0	0	0	0	0	YES
chr19	45766425	45766576	+	MARK4	0	0	0	0	0	0	0	0	-0.163333	YES
chr19	45768008	45768097	+	MARK4	0	0	0	0	0	0	0	0	0.01	YES
chr19	45851992	45852077	+	KLC3	0	0	0	0	0	0	0	0	0.71	YES
chr19	45853690	45853771	+	KLC3	0	0	0	0	0	0	0	0	2.88667	YES
chr19	45853810	45853898	+	KLC3	0	0	0	0	0	0	0	0	10.58	YES
chr19	45854006	45854211	+	KLC3	0	0	0	0	0	0	0	0	-2.36333	YES
chr19	45860630	45860731	-	ERCC2	0	0	0	0	0	0	0	0	-0.486667	YES
chr19	45867590	45867681	-	ERCC2	0	0	0	0	0	0	0	0	0.0533333	YES
chr19	45868213	45868299	-	ERCC2	0	0	0	0	0	0	0	0	-0.176667	YES
chr19	45992245	45992603	-	RTN2	0	0	0	0	0	0	0	0	-3.42333	YES
chr19	47112239	47112381	+	CALM3	0	0	0	0	0	0	0	0	-0.06	YES
chr19	47177993	47178289	-	PRKD2	0	0	0	0	0	0	0	0	0	YES
chr19	47192956	47193856	-	PRKD2	0	0	0	0	0	0	0	0	0	YES
chr19	47207649	47207751	-	PRKD2	0	0	0	0	0	0	0	0	0	YES
chr19	47251346	47251771	+	FKRP	0	0	0	0	0	0	0	0	-2.46333	YES
chr19	47876181	47876855	+	DHX34	0	0	0	0	0	0	0	0	0.183333	YES
chr19	47919960	47920060	-	MEIS3	0	0	0	0	0	0	0	0	-0.47	YES
chr19	47986473	47986551	-	KPTN	0	0	0	0	0	0	0	0	-0.256667	YES
chr19	47986637	47986758	-	KPTN	0	0	0	0	0	0	0	0	0.363333	YES
chr19	48653099	48653344	-	LIG1	0	0	0	0	0	0	0	0	0	YES
chr19	48734264	48734916	-	CARD8	0	0	0	0	0	0	0	0	-4.08	YES
chr19	48832750	48833557	+	EMP3	0	0	0	0	0	0	0	0	-0.04	YES
chr19	48981604	48981694	+	CYTH2	0	0	0	0	0	0	0	0	-0.03	YES
chr19	49004662	49004734	-	LMTK3	0	0	0	0	0	0	0	0	-0.776667	YES
chr19	49142311	49142561	-	CA11	0	0	0	0	0	0	0	0	0.0766667	YES
chr19	49142717	49142805	-	CA11	0	0	0	0	0	0	0	0	0	YES
chr19	49143141	49143351	-	CA11	0	0	0	0	0	0	0	0	-1.41333	YES
chr19	49148735	49148822	-	CA11	0	0	0	0	0	0	0	0	0	YES
chr19	49303358	49303443	-	BCAT2	0	0	0	0	0	0	0	0	0.23	YES
chr19	49425190	49425574	+	NUCB1	0	0	0	0	0	0	0	0	0.08	YES
chr19	49638173	49639035	+	PPFIA3	0	0	0	0	0	0	0	0	0	YES
chr19	49652426	49652513	+	PPFIA3	0	0	0	0	0	0	0	0	0.00666667	YES
chr19	49714100	49714271	+	TRPM4	0	0	0	0	0	0	0	0	0	YES
chr19	49963106	49964078	+	ALDH16A1	0	0	0	0	0	0	0	0	0.64	YES
chr19	49964157	49964875	+	ALDH16A1	0	0	0	0	0	0	0	0	6.37667	YES
chr19	49967521	49967673	+	ALDH16A1	0	0	0	0	0	0	0	0	-0.00333333	YES
chr19	49967780	49967888	+	ALDH16A1	0	0	0	0	0	0	0	0	0.07	YES
chr19	49969541	49971637	+	ALDH16A1	0	0	0	0	0	0	0	0	1.38	YES
chr19	50139985	50140080	-	RRAS	0	0	0	0	0	0	0	0	-0.46	YES
chr19	50285347	50285787	+	AP2A1	0	0	0	0	0	0	0	0	-0.0833333	YES
chr19	50309199	50309375	+	AP2A1	0	0	0	0	0	0	0	0	0.896667	YES
chr19	50321874	50322428	+	MED25	0	0	0	0	0	0	0	0	0.546667	YES
chr19	50332348	50333042	+	MED25	0	0	0	0	0	0	0	0	-0.143333	YES
chr19	50391575	50391680	+	TBC1D17	0	0	0	0	0	0	0	0	0	YES
chr19	51009530	51009634	-	JOSD2	0	0	0	0	0	0	0	0	0.443333	YES
chr19	53577522	53578309	-	ZNF160	0	0	0	0	0	0	0	0	-1.15	YES
chr19	54647871	54647972	+	CNOT3	0	0	0	0	0	0	0	0	0	YES
chr19	54695459	54695571	+	TSEN34	0	0	0	0	0	0	0	0	0.0933333	YES
chr19	54969182	54969281	+	LENG8	0	0	0	0	0	0	0	0	-0.51	YES
chr19	55559910	55560026	-	RDH13	0	0	0	0	0	0	0	0	-0.763333	YES
chr19	55602927	55603017	-	PPP1R12C	0	0	0	0	0	0	0	0	0.15	YES
chr19	55648581	55649328	-	TNNT1	0	0	0	0	0	0	0	0	0	YES
chr19	55649443	55652250	-	TNNT1	0	0	0	0	0	0	0	0	0	YES
chr19	55670818	55670900	-	C19orf51	0	0	0	0	0	0	0	0	0.523333	YES
chr19	56657790	56658258	+	ZNF444	0	0	0	0	0	0	0	0	-0.153333	YES
chr19	59010283	59010489	-	SLC27A5	0	0	0	0	0	0	0	0	-3.45333	YES
chr2	8919270	8919803	-	KIDINS220	0	0	0	0	0	0	0	0	0	YES
chr2	10930960	10931920	-	PDIA6	0	0	0	0	0	0	0	0	-0.00666667	YES
chr2	11300675	11300750	+	PQLC3	0	0	0	0	0	0	0	0	0.3	YES
chr2	20203048	20205504	-	MATN3	0	0	0	0	0	0	0	0	-0.953333	YES
chr2	24432903	24433648	-	ITSN2	0	0	0	0	0	0	0	0	-0.7	YES
chr2	24484120	24484429	-	ITSN2	0	0	0	0	0	0	0	0	0	YES
chr2	25463320	25463508	-	DNMT3A	0	0	0	0	0	0	0	0	0.94	YES
chr2	25497957	25498368	-	DNMT3A	0	0	0	0	0	0	0	0	0	YES
chr2	26152347	26152823	-	KIF3C	0	0	0	0	0	0	0	0	1.33333	YES
chr2	27248901	27249147	+	MAPRE3	0	0	0	0	0	0	0	0	-1.32333	YES
chr2	27276042	27276269	+	AGBL5	0	0	0	0	0	0	0	0	0.19	YES
chr2	27292575	27292959	+	AGBL5	0	0	0	0	0	0	0	0	7.24333	YES
chr2	27438261	27438341	+	C2orf28	0	0	0	0	0	0	0	0	-0.0266667	YES
chr2	27480927	27481028	-	SLC30A3	0	0	0	0	0	0	0	0	-2.1	YES
chr2	27587467	27587584	-	EIF2B4	0	0	0	0	0	0	0	0	0.06	YES
chr2	27587766	27589625	-	EIF2B4	0	0	0	0	0	0	0	0	1.19	YES
chr2	27589804	27589940	-	EIF2B4	0	0	0	0	0	0	0	0	-3.86667	YES
chr2	27590069	27590323	-	EIF2B4	0	0	0	0	0	0	0	0	-1.44333	YES
chr2	27601239	27601333	-	ZNF513	0	0	0	0	0	0	0	0	0.676667	YES
chr2	27662766	27663269	+	NRBP1	0	0	0	0	0	0	0	0	-0.15	YES
chr2	27663570	27663671	+	NRBP1	0	0	0	0	0	0	0	0	-0.18	YES
chr2	27679521	27680505	-	IFT172	0	0	0	0	0	0	0	0	0.63	YES
chr2	27717334	27717413	-	FNDC4	0	0	0	0	0	0	0	0	-0.63	YES
chr2	27857792	27858006	+	GPN1	0	0	0	0	0	0	0	0	0.16	YES
chr2	29255918	29256334	+	FAM179A	0	0	0	0	0	0	0	0	0.9	YES
chr2	32361708	32361945	+	SPAST	0	0	0	0	0	0	0	0	0	YES
chr2	33622350	33623430	+	LTBP1	0	0	0	0	0	0	0	0	0	YES
chr2	37255318	37255823	-	HEATR5B	0	0	0	0	0	0	0	0	0	YES
chr2	37292134	37292897	-	HEATR5B	0	0	0	0	0	0	0	0	0	YES
chr2	37299425	37302627	-	HEATR5B	0	0	0	0	0	0	0	0	0	YES
chr2	38201358	38202354	+	FAM82A1	0	0	0	0	0	0	0	0	0	YES
chr2	39107848	39108582	+	MORN2	0	0	0	0	0	0	0	0	-0.16	YES
chr2	39108720	39109553	+	MORN2	0	0	0	0	0	0	0	0	0	YES
chr2	44031879	44032292	+	DYNC2LI1	0	0	0	0	0	0	0	0	0	YES
chr2	47132734	47134948	-	MCFD2	0	0	0	0	0	0	0	0	-0.18	YES
chr2	47641558	47643434	+	MSH2	0	0	0	0	0	0	0	0	0	YES
chr2	48040517	48040929	-	FBXO11	0	0	0	0	0	0	0	0	0.02	YES
chr2	48066640	48066780	-	FBXO11	0	0	0	0	0	0	0	0	0	YES
chr2	48687058	48687233	+	KLRAQ1	0	0	0	0	0	0	0	0	0	YES
chr2	54028758	54028849	+	ERLEC1	0	0	0	0	0	0	0	0	-0.126667	YES
chr2	55536160	55536297	-	CCDC88A	0	0	0	0	0	0	0	0	0.0933333	YES
chr2	55898512	55899129	-	PNPT1	0	0	0	0	0	0	0	0	0	YES
chr2	62728623	62729571	-	TMEM17	0	0	0	0	0	0	0	0	-0.973333	YES
chr2	63220804	63221005	+	EHBP1	0	0	0	0	0	0	0	0	0	YES
chr2	66794644	66795798	+	MEIS1	0	0	0	0	0	0	0	0	-0.186667	YES
chr2	69172583	69173435	-	GKN2	0	0	0	0	0	0	0	0	0	YES
chr2	69173593	69174278	-	GKN2	0	0	0	0	0	0	0	0	0	YES
chr2	69174390	69177257	-	GKN2	0	0	0	0	0	0	0	0	0.233333	YES
chr2	69177396	69177833	-	GKN2	0	0	0	0	0	0	0	0	0	YES
chr2	69177888	69179981	-	GKN2	0	0	0	0	0	0	0	0	0.266667	YES
chr2	69732806	69734552	-	AAK1	0	0	0	0	0	0	0	0	0	YES
chr2	70164527	70165228	+	MXD1	0	0	0	0	0	0	0	0	0	YES
chr2	70502303	70502645	+	PCYOX1	0	0	0	0	0	0	0	0	0.06	YES
chr2	70502799	70503865	+	PCYOX1	0	0	0	0	0	0	0	0	0.0366667	YES
chr2	70915255	70917917	-	ADD2	0	0	0	0	0	0	0	0	0	YES
chr2	72741810	72742171	-	EXOC6B	0	0	0	0	0	0	0	0	0	YES
chr2	73315878	73316006	-	RAB11FIP5	0	0	0	0	0	0	0	0	-0.4	YES
chr2	73449946	73450163	+	SMYD5	0	0	0	0	0	0	0	0	0.0966667	YES
chr2	74129616	74135799	+	ACTG2	0	0	0	0	0	0	0	0	0	YES
chr2	74652103	74652201	+	WDR54	0	0	0	0	0	0	0	0	0.943333	YES
chr2	74657165	74657378	-	RTKN	0	0	0	0	0	0	0	0	0	YES
chr2	74657497	74657591	-	RTKN	0	0	0	0	0	0	0	0	0.866667	YES
chr2	74719183	74719265	+	TTC31	0	0	0	0	0	0	0	0	1.78	YES
chr2	74902512	74902651	+	SEMA4F	0	0	0	0	0	0	0	0	-1.39667	YES
chr2	75874037	75874227	+	MRPL19	0	0	0	0	0	0	0	0	-0.326667	YES
chr2	85534841	85536151	+	TCF7L1	0	0	0	0	0	0	0	0	0	YES
chr2	85778196	85778602	-	GGCX	0	0	0	0	0	0	0	0	-0.323333	YES
chr2	86705153	86705292	+	KDM3A	0	0	0	0	0	0	0	0	-0.393333	YES
chr2	86711282	86712064	+	KDM3A	0	0	0	0	0	0	0	0	1.60667	YES
chr2	88482367	88482466	+	THNSL2	0	0	0	0	0	0	0	0	0	YES
chr2	88857455	88858434	-	EIF2AK3	0	0	0	0	0	0	0	0	-0.24	YES
chr2	97377508	97377600	-	LMAN2L	0	0	0	0	0	0	0	0	0	YES
chr2	97464964	97465288	+	CNNM4	0	0	0	0	0	0	0	0	0.583333	YES
chr2	97527387	97527473	-	SEMA4C	0	0	0	0	0	0	0	0	0.766667	YES
chr2	98418425	98418890	-	TMEM131	0	0	0	0	0	0	0	0	-0.563333	YES
chr2	98419001	98419114	-	TMEM131	0	0	0	0	0	0	0	0	0	YES
chr2	99182230	99182491	+	INPP4A	0	0	0	0	0	0	0	0	0	YES
chr2	99256465	99256583	-	MGAT4A	0	0	0	0	0	0	0	0	0	YES
chr2	99811361	99811578	+	MRPL30	0	0	0	0	0	0	0	0	-0.136667	YES
chr2	99995590	99995780	+	EIF5B	0	0	0	0	0	0	0	0	0	YES
chr2	101185484	101186039	+	PDCL3	0	0	0	0	0	0	0	0	0	YES
chr2	102314600	102314934	+	MAP4K4	0	0	0	0	0	0	0	0	0.173333	YES
chr2	105687834	105687916	+	MRPS9	0	0	0	0	0	0	0	0	0	YES
chr2	140995866	140997010	-	LRP1B	0	0	0	0	0	0	0	0	0.4	YES
chr2	141202019	141202131	-	LRP1B	0	0	0	0	0	0	0	0	0	YES
chr2	141459415	141459709	-	LRP1B	0	0	0	0	0	0	0	0	0	YES
chr2	141459862	141459995	-	LRP1B	0	0	0	0	0	0	0	0	0	YES
chr2	141526914	141528449	-	LRP1B	0	0	0	0	0	0	0	0	0	YES
chr2	144709641	144710339	-	GTDC1	0	0	0	0	0	0	0	0	0	YES
chr2	144966372	144969081	-	GTDC1	0	0	0	0	0	0	0	0	-0.22	YES
chr2	152108179	152109268	-	RBM43	0	0	0	0	0	0	0	0	0	YES
chr2	152109370	152112046	-	RBM43	0	0	0	0	0	0	0	0	-2.22333	YES
chr2	153004637	153004738	-	STAM2	0	0	0	0	0	0	0	0	0	YES
chr2	158152311	158152905	+	GALNT5	0	0	0	0	0	0	0	0	0.433333	YES
chr2	158162342	158165078	+	GALNT5	0	0	0	0	0	0	0	0	0	YES
chr2	160204158	160205188	-	BAZ2B	0	0	0	0	0	0	0	0	0	YES
chr2	163124080	163124596	-	IFIH1	0	0	0	0	0	0	0	0	-1.31	YES
chr2	163133457	163133924	-	IFIH1	0	0	0	0	0	0	0	0	0	YES
chr2	163134204	163134714	-	IFIH1	0	0	0	0	0	0	0	0	0	YES
chr2	163212992	163213267	+	GCA	0	0	0	0	0	0	0	0	0.0833333	YES
chr2	166785846	166786159	-	TTC21B	0	0	0	0	0	0	0	0	0	YES
chr2	168986117	168986219	-	STK39	0	0	0	0	0	0	0	0	0	YES
chr2	169730194	169732581	-	SPC25	0	0	0	0	0	0	0	0	-0.06	YES
chr2	170344366	170344496	+	BBS5	0	0	0	0	0	0	0	0	0	YES
chr2	172182417	172182551	-	METTL8	0	0	0	0	0	0	0	0	-0.0933333	YES
chr2	172644172	172644298	-	SLC25A12	0	0	0	0	0	0	0	0	0.22	YES
chr2	173340414	173341122	+	ITGA6	0	0	0	0	0	0	0	0	0	YES
chr2	173352182	173352274	+	ITGA6	0	0	0	0	0	0	0	0	-0.553333	YES
chr2	173352359	173352455	+	ITGA6	0	0	0	0	0	0	0	0	0	YES
chr2	173352767	173352853	+	ITGA6	0	0	0	0	0	0	0	0	-0.253333	YES
chr2	173356060	173356152	+	ITGA6	0	0	0	0	0	0	0	0	-0.15	YES
chr2	175427331	175431797	-	WIPF1	0	0	0	0	0	0	0	0	-0.433333	YES
chr2	175431912	175432588	-	WIPF1	0	0	0	0	0	0	0	0	0.393333	YES
chr2	175432802	175436403	-	WIPF1	0	0	0	0	0	0	0	0	0.64	YES
chr2	175437175	175439931	-	WIPF1	0	0	0	0	0	0	0	0	0	YES
chr2	175446168	175450250	-	WIPF1	0	0	0	0	0	0	0	0	0	YES
chr2	176829152	176829233	-	KIAA1715	0	0	0	0	0	0	0	0	0	YES
chr2	179296982	179300871	-	PRKRA	0	0	0	0	0	0	0	0	3.99333	YES
chr2	179403567	179403672	-	TTN	0	0	0	0	0	0	0	0	0	YES
chr2	180835291	180835376	-	CWC22	0	0	0	0	0	0	0	0	0	YES
chr2	184023140	184024215	+	NUP35	0	0	0	0	0	0	0	0	-0.35	YES
chr2	190315695	190316530	+	WDR75	0	0	0	0	0	0	0	0	0	YES
chr2	191234004	191235569	+	INPP1	0	0	0	0	0	0	0	0	-0.233333	YES
chr2	191354593	191362164	+	MFSD6	0	0	0	0	0	0	0	0	-1.23	YES
chr2	191851674	191851764	-	STAT1	0	0	0	0	0	0	0	0	0	YES
chr2	202587844	202588052	-	ALS2	0	0	0	0	0	0	0	0	1.23333	YES
chr2	203379703	203383544	+	BMPR2	0	0	0	0	0	0	0	0	0	YES
chr2	207012386	207012476	-	NDUFS1	0	0	0	0	0	0	0	0	0.08	YES
chr2	207636015	207636617	+	FASTKD2	0	0	0	0	0	0	0	0	-0.0833333	YES
chr2	209200626	209200769	+	PIKFYVE	0	0	0	0	0	0	0	0	0	YES
chr2	219140345	219140748	-	TMBIM1	0	0	0	0	0	0	0	0	0.113333	YES
chr2	219204622	219204751	+	PNKD	0	0	0	0	0	0	0	0	-0.113333	YES
chr2	219498485	219498827	+	PLCD4	0	0	0	0	0	0	0	0	-1.30667	YES
chr2	219498945	219499180	+	PLCD4	0	0	0	0	0	0	0	0	1.55333	YES
chr2	219499354	219500518	+	PLCD4	0	0	0	0	0	0	0	0	-2.08333	YES
chr2	219500655	219500965	+	PLCD4	0	0	0	0	0	0	0	0	-4.27333	YES
chr2	219501116	219501193	+	PLCD4	0	0	0	0	0	0	0	0	1.91	YES
chr2	219540197	219540751	+	STK36	0	0	0	0	0	0	0	0	0.393333	YES
chr2	219942087	219942810	-	NHEJ1	0	0	0	0	0	0	0	0	-0.436667	YES
chr2	220011461	220012378	-	NHEJ1	0	0	0	0	0	0	0	0	0	YES
chr2	220073209	220073293	+	ZFAND2B	0	0	0	0	0	0	0	0	-5.56	YES
chr2	220088745	220088827	-	ATG9A	0	0	0	0	0	0	0	0	-0.0333333	YES
chr2	220113037	220113142	+	STK16	0	0	0	0	0	0	0	0	-1.26	YES
chr2	220147958	220148140	+	DNAJB2	0	0	0	0	0	0	0	0	1.19	YES
chr2	220155020	220155259	-	PTPRN	0	0	0	0	0	0	0	0	0.0633333	YES
chr2	220155334	220155547	-	PTPRN	0	0	0	0	0	0	0	0	-0.06	YES
chr2	220155613	220156191	-	PTPRN	0	0	0	0	0	0	0	0	-0.0166667	YES
chr2	220161068	220161160	-	PTPRN	0	0	0	0	0	0	0	0	0.116667	YES
chr2	220326780	220327019	+	SPEG	0	0	0	0	0	0	0	0	4.18	YES
chr2	220412804	220413873	+	TMEM198	0	0	0	0	0	0	0	0	-2.56333	YES
chr2	220432692	220432776	-	OBSL1	0	0	0	0	0	0	0	0	-0.563333	YES
chr2	220467298	220467426	+	STK11IP	0	0	0	0	0	0	0	0	1.01667	YES
chr2	220467499	220470329	+	STK11IP	0	0	0	0	0	0	0	0	0	YES
chr2	220471860	220472768	+	STK11IP	0	0	0	0	0	0	0	0	0.233333	YES
chr2	220476557	220476676	+	STK11IP	0	0	0	0	0	0	0	0	1.27333	YES
chr2	220477948	220478473	+	STK11IP	0	0	0	0	0	0	0	0	0.47	YES
chr2	220478965	220479197	+	STK11IP	0	0	0	0	0	0	0	0	0.486667	YES
chr2	220497732	220497995	+	SLC4A3	0	0	0	0	0	0	0	0	3.80667	YES
chr2	224840622	224842260	-	SERPINE2	0	0	0	0	0	0	0	0	0	YES
chr2	224847499	224849468	-	SERPINE2	0	0	0	0	0	0	0	0	0	YES
chr2	224863060	224866358	-	SERPINE2	0	0	0	0	0	0	0	0	0	YES
chr2	228552290	228552881	-	SLC19A3	0	0	0	0	0	0	0	0	0	YES
chr2	231065682	231067294	-	SP110	0	0	0	0	0	0	0	0	-0.443333	YES
chr2	231072775	231074645	-	SP110	0	0	0	0	0	0	0	0	0	YES
[truncated: 21,655 more rows]

## Sheet: all_introns
chr	intron_start	intron_end	strd	gene_name	reads_AciL	reads_AciS	reads_T7Aci	reads_ContL	reads_ContS	reads_T7ContL	reads_Aci (all iCLIP)	reads_Cont (all iCLIP)	delta_pir	reliable_delta_pir
chr1	156182968	156202110	+	PMF1	342	121	71	327	317	3	534	647	-0.3	YES
chr10	72576637	72604229	+	SGPL1	47	63	44	26	222	5	154	253	0	YES
chr3	193372817	193374868	+	OPA1	28	45	12	26	146	2	85	174	-0.21	YES
chr12	5674830	5684999	-	ANO2	23	14	8	19	39	0	45	58	1.41	YES
chr2	233746976	233748020	-	NGEF	3	0	0	0	16	0	3	16	0.376667	YES
chr15	42853601	42855946	+	HAUS2	1	0	4	2	13	0	5	15	-4.20667	YES
chr17	28773039	28776570	+	CPD	2	0	2	8	6	0	4	14	0	YES
chr3	47777617	47779518	-	SMARCC1	2	1	1	4	10	0	4	14	0	YES
chr7	106830763	106836278	+	HBP1	4	7	12	1	11	20	23	32	0.216667	YES
chr14	73744002	73745988	-	NUMB	0	2	5	7	9	0	7	16	-0.55	YES
chr6	165832266	165842145	-	PDE10A	5	2	3	4	10	5	10	19	0	YES
chr17	65144831	65145982	-	HELZ	2	1	2	1	6	7	5	14	0	YES
chr3	179458161	179459984	+	USP13	0	0	1	5	5	0	1	10	0	YES
chr12	106773918	106786808	+	POLR3B	2	0	8	5	9	4	10	18	0	YES
chr11	102239280	102248226	+	BIRC2	2	0	6	0	13	3	8	16	0.0566667	YES
chr6	165746617	165749611	-	PDE10A	3	1	5	6	9	2	9	17	-2.27	YES
chr3	155544609	155545970	-	SLC33A1	9	5	3	13	11	1	17	25	-3.8	YES
chr7	136939722	137028184	-	PTN	4	3	3	4	14	0	10	18	0	YES
chr1	109556548	109560139	-	WDR47	1	2	2	3	10	0	5	13	1.01	YES
chr16	48333700	48337082	+	LONP2	1	1	2	2	3	7	4	12	0	YES
chr3	196118797	196120424	-	UBXN7	2	0	2	6	6	0	4	12	0	YES
chr14	74433718	74436712	-	ENTPD5	2	3	1	1	11	2	6	14	-0.443333	YES
chr15	48802367	48805745	-	FBN1	1	2	1	2	7	3	4	12	0	YES
chr6	151336117	151336651	+	MTHFD1L	1	1	1	0	11	0	3	11	0	YES
chr8	28999821	29003894	-	KIF13B	1	1	1	10	1	0	3	11	0	YES
chr3	9972628	9974291	+	IL17RC	0	0	1	3	6	0	1	9	-8.97	YES
chr11	32622379	32623307	+	EIF3M	3	1	0	1	9	2	4	12	-0.236667	YES
chr6	44361311	44364077	+	CDC5L	1	1	0	1	9	0	2	10	0	YES
chr12	27468284	27470268	+	STK38L	3	0	0	4	7	0	3	11	0.386667	YES
chr15	45879724	45884332	+	PLDN	2	1	7	1	14	2	10	17	0.05	YES
chr4	128938657	128941234	+	C4orf29	1	1	5	5	9	0	7	14	0.496667	YES
chr8	54682304	54684548	-	ATP6V1H	1	1	5	2	11	1	7	14	0.0433333	YES
chr3	39121300	39125645	+	WDR48	2	0	3	5	5	2	5	12	0.193333	YES
chr1	207930548	207930884	+	CD46	4	6	2	8	8	3	12	19	-0.0266667	YES
chr5	86676413	86679529	+	RASA1	1	2	2	8	2	2	5	12	1.12333	YES
chr6	147556468	147560305	+	STXBP5	1	1	2	4	5	2	4	11	0	YES
chr6	71266567	71269418	+	FAM135A	0	1	2	7	3	0	3	10	-0.253333	YES
chr9	100232952	100234574	+	TDRD7	0	0	2	2	7	0	2	9	0.68	YES
chr9	32553943	32558907	-	NDUFB6	0	1	1	5	3	1	2	9	-0.103333	YES
chr6	165806286	165808669	-	PDE10A	3	0	1	2	7	2	4	11	0.9	YES
chr18	32336008	32345924	+	DTNA	1	0	1	2	7	0	2	9	0	YES
chr18	43479532	43480960	-	KIAA1632	0	0	1	4	4	0	1	8	0	YES
chr2	223782874	223783781	+	ACSL3	0	0	1	1	6	1	1	8	0	YES
chr3	120424962	120428626	-	RABL3	0	0	1	6	2	0	1	8	0	YES
chr10	111876169	111877099	+	ADD3	4	3	0	6	7	1	7	14	0.4	YES
chr4	144468062	144468537	+	SMARCA5	3	2	0	4	8	0	5	12	0.0333333	YES
chr8	48874777	48874864	+	MCM4	0	1	0	0	8	0	1	8	0.04	YES
chr2	61007915	61009019	+	PAPOLG	1	0	0	7	1	0	1	8	0	YES
chr4	79297034	79300879	+	FRAS1	0	0	0	4	3	0	0	7	0	YES
chr1	32852497	32859680	-	BSDC1	1	2	8	7	5	5	11	17	0.13	YES
chr3	17209321	17226600	-	TBC1D5	6	1	6	2	17	0	13	19	0.293333	YES
chr10	104493361	104495618	+	SFXN2	1	1	6	6	5	3	8	14	-1.43	YES
chr16	15761297	15771657	+	NDE1	1	1	5	2	9	2	7	13	0	YES
chr19	16940709	16942304	+	SIN3B	1	0	5	10	2	0	6	12	0.173333	YES
chr4	2896459	2899910	+	ADD1	1	3	4	6	7	1	8	14	0.47	YES
chr13	45594564	45601919	+	KIAA1704	0	4	3	2	8	3	7	13	-0.266667	YES
chr2	64327634	64331834	-	PELI1	2	2	3	1	5	7	7	13	-0.886667	YES
chr1	29424448	29435847	+	EPB41	3	1	3	1	11	1	7	13	0	YES
chr6	139101123	139106363	+	CCDC28A	0	0	3	0	6	3	3	9	0	YES
chr14	90430018	90432490	+	TDP1	3	2	2	4	6	3	7	13	0.0833333	YES
chr12	69756688	69759412	+	YEATS4	0	2	2	0	10	0	4	10	0	YES
chr5	59934718	59938638	-	DEPDC1B	1	1	2	1	8	1	4	10	0	YES
chr14	59814342	59819243	+	DAAM1	1	0	2	1	8	0	3	9	0	YES
chr2	158617590	158622432	-	ACVR1	1	0	2	6	3	0	3	9	0	YES
chr3	33543261	33552049	-	CLASP2	1	0	2	4	3	2	3	9	-0.41	YES
chr14	100387215	100402365	+	EML1	0	0	2	0	7	1	2	8	0	YES
chr17	39987143	39988643	-	NT5C3L	0	0	2	0	3	5	2	8	0	YES
chr13	21995304	21999790	-	ZDHHC20	2	4	1	3	10	0	7	13	0	YES
chr2	25851254	25861882	-	DTNB	1	4	1	3	7	2	6	12	0	YES
chr16	70311058	70316522	-	AARS	4	3	1	10	4	0	8	14	0	YES
chr12	48459464	48460709	-	SENP1	0	3	1	5	5	0	4	10	0	YES
chrX	38182778	38186592	-	RPGR	2	0	1	1	6	2	3	9	-1.07667	YES
chr19	43979697	43982198	-	PHLDB3	1	0	1	6	2	0	2	8	-1.51667	YES
chr2	224749467	224758950	-	WDFY1	1	0	1	0	7	1	2	8	0	YES
chr19	10421617	10426061	-	FDX1L	0	0	1	7	0	0	1	7	-0.0133333	YES
chr9	72893542	72895674	+	SMC5	0	0	1	3	3	1	1	7	-0.236667	YES
chr18	10787183	10789076	-	FAM38B	6	2	0	9	5	0	8	14	0	YES
chr20	47768285	47770469	-	STAU1	1	2	0	3	5	1	3	9	0.0433333	YES
chr6	126248905	126249319	+	NCOA7	1	2	0	5	3	1	3	9	-0.173333	YES
chr4	146767166	146770473	-	ZNF827	0	2	0	2	6	0	2	8	0	YES
chr11	94203809	94204739	-	MRE11A	2	1	0	3	4	2	3	9	-0.19	YES
chr18	10680369	10681657	-	FAM38B	2	1	0	5	4	0	3	9	-0.523333	YES
chrX	14932722	14933789	+	MOSPD2	2	1	0	5	3	1	3	9	-1.47667	YES
chr20	251909	256608	-	C20orf96	0	1	0	4	3	0	1	7	0.906667	YES
chr8	126075894	126079833	-	KIAA0196	3	0	0	6	3	0	3	9	0	YES
chr4	48621388	48622655	-	FRYL	2	0	0	2	3	3	2	8	0	YES
chr10	64911951	64913270	+	NRBF2	0	0	0	0	6	0	0	6	0	YES
chr11	62373687	62374429	-	EML3	0	0	0	0	6	0	0	6	1.07	YES
chr18	47906621	47908498	+	SKA1	0	0	0	3	3	0	0	6	-0.283333	YES
chr1	150437204	150443036	+	RPRD2	8	1	17	11	16	4	26	31	0.143333	YES
chr2	30369929	30379493	+	YPEL5	6	13	14	1	21	16	33	38	-0.15	YES
chr4	139144479	139153420	-	SLC7A11	8	6	12	7	12	12	26	31	1.20667	YES
chr5	81460357	81474308	+	ATG10	1	3	10	9	10	0	14	19	0	YES
chr4	85731498	85738544	-	WDFY3	2	2	8	6	10	1	12	17	0	YES
chr15	64381051	64385843	-	FAM96A	2	1	7	4	6	5	10	15	0.0466667	YES
chr1	12294421	12302569	+	VPS13D	2	4	5	7	8	1	11	16	0.53	YES
chr2	62106147	62107420	-	CCT4	0	1	5	8	3	0	6	11	-0.01	YES
chr1	246823637	246829001	+	CNST	2	2	4	0	11	2	8	13	1.54667	YES
chr4	144130811	144133470	+	USP38	1	0	4	0	6	4	5	10	0.116667	YES
chr10	64906054	64911909	+	NRBF2	7	1	3	3	13	0	11	16	0.0466667	YES
chr6	41884678	41888742	-	MED20	0	1	3	2	5	2	4	9	-0.603333	YES
chr19	5924917	5925644	-	RANBP3	0	0	3	3	5	0	3	8	0.0866667	YES
chr8	11679388	11683532	+	FDFT1	4	5	2	5	11	0	11	16	0.0966667	YES
chr1	179019501	179023663	+	FAM20B	4	4	2	5	8	2	10	15	-0.11	YES
chr4	25836946	25848915	-	SEL1L3	3	2	2	3	6	3	7	12	0	YES
chr4	128871003	128878655	-	MFSD8	3	2	2	0	9	3	7	12	0	YES
chr11	108173757	108175401	+	ATM	2	2	2	2	8	1	6	11	0	YES
chr17	17957549	17962181	+	C17orf39	2	1	2	0	9	1	5	10	0	YES
chr17	49057279	49059884	-	SPAG9	2	1	2	5	5	0	5	10	0	YES
chr7	91722631	91724336	+	AKAP9	0	1	2	4	3	1	3	8	0.14	YES
chr14	50790835	50792326	+	ATP5S	3	0	2	7	3	0	5	10	1.78	YES
chr3	196089559	196094898	-	UBXN7	3	0	2	7	0	3	5	10	-0.656667	YES
chr1	12322138	12326937	+	VPS13D	1	0	2	2	6	0	3	8	0	YES
chr7	45954545	45956146	-	IGFBP3	1	0	2	4	4	0	3	8	0.593333	YES
chr6	76591536	76595720	+	MYO6	0	0	2	1	3	3	2	7	0	YES
chr8	29039524	29043808	-	KIF13B	0	0	2	5	0	2	2	7	0	YES
chr3	97652678	97655628	+	CRYBG3	2	4	1	4	8	0	7	12	0	YES
chr13	21006436	21013731	-	CRYL1	1	2	1	1	6	2	4	9	0	YES
chr7	6175583	6178722	+	USP42	0	2	1	2	5	1	3	8	0	YES
chr20	32026833	32031116	-	SNTA1	1	1	1	5	3	0	3	8	0	YES
chr12	68725002	68726007	-	MDM1	0	1	1	2	5	0	2	7	0	YES
chr1	150997272	150997990	+	PRUNE	1	0	1	0	4	3	2	7	0.233333	YES
chr12	30790122	30792448	-	IPO8	1	0	1	0	7	0	2	7	0	YES
chr17	35822226	35825534	+	TADA2A	1	0	1	0	7	0	2	7	0	YES
chr1	84648012	84649719	+	PRKACB	0	0	1	0	6	0	1	6	0.1	YES
chr11	46896655	46897006	-	LRP4	0	0	1	0	6	0	1	6	0	YES
chr12	46623052	46623346	-	SLC38A1	0	0	1	0	6	0	1	6	0.1	YES
chr14	21859802	21859991	-	CHD8	0	0	1	0	3	3	1	6	0.356667	YES
chr22	32150151	32150847	+	DEPDC5	0	0	1	4	2	0	1	6	0	YES
chr9	5743014	5743688	+	KIAA1432	0	0	1	0	4	2	1	6	-0.336667	YES
chr12	123097778	123098172	+	KNTC1	0	2	0	6	0	1	2	7	-0.226667	YES
chr21	37729023	37732252	+	MORC3	0	2	0	0	4	3	2	7	0	YES
chr14	64626161	64628789	+	SYNE2	3	1	0	4	1	4	4	9	0	YES
chr6	170873721	170876005	+	TBP	3	1	0	6	3	0	4	9	-1.32333	YES
chr20	42242617	42247579	+	IFT52	1	1	0	4	3	0	2	7	0	YES
chr11	82639981	82641198	+	C11orf82	0	1	0	5	1	0	1	6	0.04	YES
chr6	52897453	52902736	-	ICK	5	0	0	2	8	0	5	10	0	YES
chr5	147795634	147796556	+	FBXO38	3	0	0	2	6	0	3	8	-0.0166667	YES
chr5	59941447	59943224	-	DEPDC1B	2	0	0	1	6	0	2	7	0	YES
chr2	62729930	62733164	-	TMEM17	1	0	0	3	2	1	1	6	0.1	YES
chr5	127466899	127469856	+	SLC12A2	1	0	0	0	6	0	1	6	0	YES
chr7	86541562	86542256	-	KIAA1324L	1	0	0	0	0	6	1	6	0	YES
chr1	12327069	12327901	+	VPS13D	0	0	0	0	5	0	0	5	0	YES
chr1	208269471	208270074	-	PLXNA2	0	0	0	0	5	0	0	5	0	YES
chr17	41566903	41567758	+	DHX8	0	0	0	3	2	0	0	5	0	YES
chr2	121981964	121983137	-	TFCP2L1	0	0	0	0	5	0	0	5	-1.07667	YES
chr22	38468618	38469006	+	PICK1	0	0	0	0	5	0	0	5	-0.0233333	YES
chr4	6613006	6615944	+	MAN2B2	0	0	0	1	4	0	0	5	-0.426667	YES
chr5	68670539	68677727	+	RAD17	0	0	0	2	3	0	0	5	0	YES
chr8	95501089	95502166	-	KIAA1429	0	0	0	0	5	0	0	5	-0.253333	YES
chr8	101281176	101282096	-	RNF19A	0	0	0	3	0	2	0	5	-0.203333	YES
chr9	15199924	15203820	-	TTC39B	0	0	0	3	1	1	0	5	0	YES
chr9	137707476	137707780	+	COL5A1	0	0	0	0	5	0	0	5	0	YES
chr11	107403133	107420478	-	ALKBH8	4	4	12	7	14	3	20	24	0.933333	YES
chr10	102013297	102016018	-	CWF19L1	3	3	7	1	7	9	13	17	-0.07	YES
chr17	73847758	73851319	-	WBP2	6	0	7	5	8	4	13	17	-0.113333	YES
chr9	17761508	17786378	+	SH3GL2	3	5	6	8	8	2	14	18	0.00666667	YES
chr19	40847798	40854230	-	C19orf47	2	1	6	2	7	4	9	13	0	YES
chr2	141260673	141264364	-	LRP1B	2	4	5	4	11	0	11	15	0.496667	YES
chr16	11643602	11647388	-	LITAF	4	3	5	9	4	3	12	16	0.05	YES
chrX	31190531	31191655	-	DMD	1	0	5	0	10	0	6	10	0	YES
chr11	96092343	96098143	-	CCDC82	4	4	4	1	7	8	12	16	2.31667	YES
chr19	14557374	14561129	+	PKN1	0	3	4	4	4	3	7	11	-0.0433333	YES
chr13	77725085	77730192	-	MYCBP2	6	2	4	2	12	2	12	16	-0.00666667	YES
chr6	134304019	134305513	+	TBPL1	3	2	4	3	10	0	9	13	0.87	YES
chr15	91561116	91565383	-	VPS33B	2	1	4	2	8	1	7	11	0.556667	YES
chr16	56504704	56508739	+	OGFOD1	0	1	4	4	5	0	5	9	0.0766667	YES
chr6	152570398	152576014	-	SYNE1	2	5	3	4	2	8	10	14	0	YES
chr6	27425189	27435631	-	ZNF184	0	4	3	4	6	1	7	11	0	YES
chr22	43237023	43243519	-	ARFGAP3	1	3	3	2	9	0	7	11	0	YES
chr7	151042553	151046158	+	NUB1	11	2	3	3	17	0	16	20	0.103333	YES
chr14	31171582	31175028	+	SCFD1	5	2	3	3	9	2	10	14	0.12	YES
chr4	36168670	36179448	-	ARAP2	5	2	3	2	4	8	10	14	0	YES
chr1	212788604	212791468	+	ATF3	4	1	3	0	4	8	8	12	2.18	YES
chr1	213170661	213173667	-	ANGEL2	3	0	3	5	5	0	6	10	0	YES
chr6	70462249	70490385	-	LMBRD1	4	5	2	10	4	1	11	15	0	YES
chr13	50307183	50321084	-	KPNA3	6	4	2	4	9	3	12	16	0	YES
chr14	53130566	53133092	-	ERO1L	4	4	2	7	6	1	10	14	0	YES
chr2	85850906	85852661	+	USP39	2	4	2	4	6	2	8	12	0	YES
chr9	135158801	135161809	-	SETX	2	4	2	0	6	6	8	12	-0.223333	YES
chr4	42037351	42041002	+	SLC30A9	2	2	2	3	7	0	6	10	0	YES
chrX	7870183	7880068	-	PNPLA4	2	2	2	4	6	0	6	10	-0.68	YES
chr1	12439651	12443034	+	VPS13D	1	2	2	7	2	0	5	9	0	YES
chr14	50628328	50641171	-	SOS2	3	1	2	1	6	3	6	10	-0.776667	YES
chr1	236969534	236972003	+	MTR	2	1	2	4	5	0	5	9	2.60667	YES
chr3	196730971	196733419	-	MFI2	2	1	2	5	1	3	5	9	8.51667	YES
chr5	32783135	32784904	+	NPR3	2	1	2	5	3	1	5	9	0.276667	YES
chr19	41725383	41726540	+	AXL	0	1	2	0	2	5	3	7	0.266667	YES
chr11	10011143	10013961	-	SBF2	9	0	2	3	10	2	11	15	0	YES
chr9	34614766	34616026	-	DCTN3	3	0	2	3	1	5	5	9	0.263333	YES
chr1	100315972	100316530	+	AGL	1	0	2	1	6	0	3	7	1.09333	YES
chr15	70949467	70952489	-	UACA	1	0	2	4	2	1	3	7	0	YES
chr4	25158597	25160574	-	SEPSECS	1	0	2	0	0	7	3	7	-1.89333	YES
chr5	60835587	60837710	+	ZSWIM6	1	0	2	2	5	0	3	7	0.21	YES
chr10	75158144	75160560	-	ANXA7	0	0	2	6	0	0	2	6	0	YES
chr14	54897123	54898825	-	CNIH	0	0	2	1	4	1	2	6	0.04	YES
chr14	64460688	64461761	+	SYNE2	0	0	2	3	3	0	2	6	0	YES
chr2	176835533	176844537	-	KIAA1715	0	0	2	4	2	0	2	6	0	YES
chr20	368946	371930	+	TRIB3	0	0	2	0	3	3	2	6	0.68	YES
chr8	59484874	59488458	+	SDCBP	0	4	1	1	4	4	5	9	0	YES
chr5	60067921	60083160	-	ELOVL7	8	3	1	5	6	5	12	16	-0.9	YES
chr7	17370511	17373535	+	AHR	6	2	1	4	6	3	9	13	-0.27	YES
chr10	31791438	31799600	+	ZEB1	3	2	1	1	9	0	6	10	0	YES
chr7	97482699	97483891	-	ASNS	2	2	1	4	4	1	5	9	-0.52	YES
chr2	180835804	180837919	-	CWC22	2	1	1	0	4	4	4	8	0.23	YES
chr10	121668643	121671555	+	SEC23IP	1	1	1	0	7	0	3	7	-0.0366667	YES
chr10	134004340	134006161	+	DPYSL4	0	1	1	0	4	2	2	6	-1.34667	YES
chr3	179299009	179301140	+	ACTL6A	0	1	1	2	4	0	2	6	0.18	YES
chr12	120428102	120436324	+	CCDC64	4	0	1	2	2	5	5	9	-1.19	YES
chr3	25611410	25622036	+	RARB	4	0	1	5	3	1	5	9	0	YES
chr3	44847479	44852337	+	KIF15	4	0	1	6	3	0	5	9	0	YES
chr1	231406747	231408057	+	GNPAT	3	0	1	7	1	0	4	8	0.303333	YES
chr16	74511432	74514138	-	GLG1	3	0	1	3	5	0	4	8	0.08	YES
chr3	128979651	128982746	+	COPG	3	0	1	2	2	4	4	8	0.08	YES
chr9	125652825	125655187	-	RC3H2	3	0	1	0	4	4	4	8	-0.06	YES
chr14	67807236	67810088	-	ATP6V1D	2	0	1	2	2	3	3	7	0.0633333	YES
chr10	23393174	23399170	+	MSRB2	1	0	1	0	4	2	2	6	0	YES
chr14	71513823	71514523	+	PCNX	1	0	1	0	5	1	2	6	0	YES
chr8	86126861	86127149	-	C8orf59	1	0	1	2	2	2	2	6	-0.0833333	YES
chr1	39783080	39784124	+	MACF1	0	0	1	2	3	0	1	5	0	YES
chr11	33107536	33108533	-	CSTF3	0	0	1	0	4	1	1	5	0.283333	YES
chr14	74538201	74538598	-	ALDH6A1	0	0	1	2	2	1	1	5	-0.546667	YES
chr17	3838572	3839560	-	ATP2A3	0	0	1	0	5	0	1	5	-0.716667	YES
chr4	104115842	104116270	-	CENPE	0	0	1	0	5	0	1	5	0	YES
chr7	138591849	138593736	-	KIAA1549	0	0	1	2	3	0	1	5	0	YES
chr8	37609234	37610967	+	ERLIN2	0	0	1	2	3	0	1	5	-0.0133333	YES
chr8	42940025	42940302	+	FNTA	0	0	1	0	5	0	1	5	0.00333333	YES
chr1	78205103	78206561	-	USP33	1	5	0	4	6	0	6	10	0	YES
chr15	63988539	63990926	-	HERC1	0	3	0	2	5	0	3	7	0	YES
chr12	65133280	65134385	-	GNS	0	2	0	2	4	0	2	6	0.263333	YES
chr13	50129810	50134053	-	RCBTB1	2	1	0	0	7	0	3	7	0	YES
chr15	43294903	43296034	-	UBR1	2	1	0	1	2	4	3	7	-0.106667	YES
chr2	224770719	224776969	-	WDFY1	2	1	0	5	2	0	3	7	0	YES
chr18	12680828	12686260	-	CEP76	1	1	0	1	3	2	2	6	0.646667	YES
chr5	74869695	74872604	+	POLK	1	1	0	2	2	2	2	6	0	YES
chr6	83904372	83905313	+	RWDD2A	1	1	0	3	2	1	2	6	3.33333	YES
chr20	3624916	3627369	+	ATRN	0	1	0	1	1	3	1	5	0	YES
chr4	68539496	68543328	-	UBA6	0	1	0	4	1	0	1	5	0.203333	YES
chr9	72938523	72938936	+	SMC5	0	1	0	0	5	0	1	5	0.156667	YES
chrX	100538572	100541562	-	TAF7L	0	1	0	4	1	0	1	5	0.916667	YES
chr14	64450605	64453173	+	SYNE2	5	0	0	2	7	0	5	9	0	YES
chr8	82583283	82586075	-	IMPA1	5	0	0	2	5	2	5	9	-0.436667	YES
chr13	48934264	48936950	+	RB1	3	0	0	4	2	1	3	7	0	YES
chr14	31576911	31578602	-	HECTD1	3	0	0	0	6	1	3	7	-0.16	YES
chr4	122760852	122765081	-	BBS7	3	0	0	5	0	2	3	7	0	YES
chr3	122264337	122269430	-	PARP9	2	0	0	3	3	0	2	6	0	YES
chr4	170508765	170509799	-	NEK1	2	0	0	1	5	0	2	6	-0.423333	YES
chr11	44621781	44626607	+	CD82	1	0	0	1	3	1	1	5	0.06	YES
chr11	134064046	134064559	-	NCAPD3	1	0	0	0	5	0	1	5	0	YES
chr12	69964298	69965055	+	FRS2	1	0	0	3	2	0	1	5	-0.19	YES
chr15	35174841	35176725	-	AQR	1	0	0	1	4	0	1	5	-0.143333	YES
chr19	30311756	30312628	+	CCNE1	1	0	0	2	3	0	1	5	-0.27	YES
chr19	40882682	40883692	+	PLD3	1	0	0	3	1	1	1	5	0	YES
chr4	95197626	95198172	+	SMARCAD1	1	0	0	4	1	0	1	5	0.156667	YES
chr4	123268935	123269721	+	KIAA1109	1	0	0	0	5	0	1	5	0	YES
chr5	95734741	95735656	-	PCSK1	1	0	0	0	5	0	1	5	0	YES
chr1	10399918	10402107	+	KIF1B	0	0	0	1	3	0	0	4	0	YES
chr1	22078109	22079019	-	USP48	0	0	0	1	3	0	0	4	0	YES
chr1	53351567	53352627	+	ZYG11A	0	0	0	4	0	0	0	4	0.366667	YES
chr10	104111132	104111599	+	GBF1	0	0	0	1	0	3	0	4	0.226667	YES
chr10	124271582	124273706	+	HTRA1	0	0	0	4	0	0	0	4	0.0833333	YES
chr11	13395749	13397158	+	ARNTL	0	0	0	2	2	0	0	4	2.00333	YES
chr11	64673128	64673213	-	ATG2A	0	0	0	0	0	4	0	4	-2.03333	YES
chr11	65733251	65733357	+	SART1	0	0	0	3	1	0	0	4	0	YES
chr11	108158443	108159703	+	ATM	0	0	0	4	0	0	0	4	0	YES
chr11	111747364	111747531	-	FDXACB1	0	0	0	0	4	0	0	4	4.73667	YES
chr11	125472320	125472697	+	STT3A	0	0	0	2	2	0	0	4	0	YES
chr12	71532011	71533490	-	TSPAN8	0	0	0	2	2	0	0	4	0.0266667	YES
chr12	89860700	89861393	-	POC1B	0	0	0	2	2	0	0	4	0	YES
chr12	109936159	109937437	+	UBE3B	0	0	0	3	1	0	0	4	0	YES
chr12	120947927	120954369	-	COQ5	0	0	0	0	4	0	0	4	0	YES
chr13	49885130	49906082	-	CAB39L	0	0	0	2	1	1	0	4	0	YES
chr14	64634106	64634212	+	SYNE2	0	0	0	2	2	0	0	4	0	YES
chr14	72172058	72175938	+	SIPA1L1	0	0	0	4	0	0	0	4	0	YES
chr16	23415156	23417396	-	COG7	0	0	0	4	0	0	0	4	0	YES
chr16	74760230	74761141	-	FA2H	0	0	0	2	2	0	0	4	-0.653333	YES
chr2	27706527	27706738	-	IFT172	0	0	0	0	2	2	0	4	0	YES
chr22	31969201	31971216	+	SFI1	0	0	0	3	0	1	0	4	0	YES
chr3	39119731	39121201	+	WDR48	0	0	0	0	4	0	0	4	0.13	YES
chr3	142521187	142522818	+	TRPC1	0	0	0	1	3	0	0	4	-4	YES
chr4	56225656	56230240	+	SRD5A3	0	0	0	1	3	0	0	4	-0.03	YES
chr4	141463797	141464606	+	ELMOD2	0	0	0	2	2	0	0	4	0.206667	YES
chr6	123117036	123117968	+	SMPDL3A	0	0	0	0	4	0	0	4	0.15	YES
chr8	118830770	118831914	-	EXT1	0	0	0	3	0	1	0	4	0	YES
chr9	2641500	2643159	+	VLDLR	0	0	0	0	4	0	0	4	-4.58	YES
chr9	37525170	37529120	-	FBXO10	0	0	0	0	3	1	0	4	0	YES
chrX	9661253	9661361	+	TBL1X	0	0	0	0	4	0	0	4	0	YES
chr7	27835839	27839583	+	TAX1BP1	3	2	10	6	6	6	15	18	-0.0866667	YES
chr4	79522723	79525430	+	ANXA3	2	2	10	4	9	4	14	17	0.0266667	YES
chr6	74354327	74363515	-	SLC17A5	7	4	9	7	14	2	20	23	0	YES
chr1	169858032	169862928	-	SCYL3	2	0	9	1	13	0	11	14	-1.55333	YES
chr3	25661554	25662172	-	TOP2B	4	3	8	4	10	4	15	18	0.29	YES
chr6	71246115	71247993	+	FAM135A	5	1	8	3	10	4	14	17	0.376667	YES
chr9	13119649	13121737	-	MPDZ	8	6	7	5	14	5	21	24	8.11333	YES
chr10	11317084	11330380	+	CELF2	2	6	7	4	9	5	15	18	0	YES
chr4	122591168	122592701	-	ANXA5	3	4	7	0	7	10	14	17	-0.0366667	YES
chr12	77257125	77259928	-	CSRP2	6	3	7	9	9	1	16	19	-0.54	YES
chr17	49281287	49284248	-	MBTD1	4	1	7	3	12	0	12	15	-0.9	YES
chr6	160499395	160500611	+	IGF2R	3	0	7	1	9	3	10	13	0.166667	YES
chr9	132662827	132665147	-	FNBP1	1	5	6	5	10	0	12	15	0	YES
chr12	112124044	112130500	+	ACAD10	0	4	6	8	4	1	10	13	-3.54	YES
chr2	135848701	135851184	+	RAB3GAP1	4	1	6	1	10	3	11	14	-0.136667	YES
chr6	151748718	151751272	-	RMND1	2	0	6	0	9	2	8	11	0	YES
chr11	31477934	31482172	-	IMMP1L	0	0	6	6	3	0	6	9	0.0666667	YES
chr3	10188321	10191470	+	VHL	1	7	5	6	8	2	13	16	0.273333	YES
chr15	42744153	42749155	-	ZFP106	1	3	5	6	1	5	9	12	-0.176667	YES
chr14	90423145	90429451	+	TDP1	2	2	5	8	4	0	9	12	3.81	YES
chr14	104506672	104508405	+	TDRD9	0	1	5	0	9	0	6	9	0	YES
chr2	242680506	242681849	+	D2HGDH	0	1	5	4	4	1	6	9	0	YES
chr6	135360906	135363138	-	HBS1L	3	0	5	2	7	2	8	11	0.0566667	YES
chr3	123376276	123382951	-	MYLK	5	6	4	7	8	3	15	18	0.53	YES
chr17	41215969	41219624	-	BRCA1	2	4	4	3	9	1	10	13	0.08	YES
chr12	111074307	111078187	+	TCTN1	1	3	4	6	1	4	8	11	-1.38667	YES
chr13	96272202	96274596	-	DZIP1	0	2	4	1	7	1	6	9	0	YES
chr15	56216898	56243573	-	NEDD4	2	1	4	4	6	0	7	10	0	YES
chr15	72645520	72646031	-	HEXA	2	1	4	8	1	1	7	10	0.106667	YES
chr17	36863283	36863738	+	MLLT6	1	1	4	2	6	1	6	9	-0.373333	YES
chr22	32797891	32802648	-	C22orf28	1	1	4	2	5	2	6	9	0	YES
chr10	101953189	101953740	-	CHUK	0	1	4	2	6	0	5	8	-0.1	YES
chr5	150585037	150603483	-	CCDC69	0	1	4	2	6	0	5	8	0	YES
chr6	42952443	42957348	+	PPP2R5D	2	0	4	2	6	1	6	9	0	YES
chr11	3740781	3741941	-	NUP98	1	0	4	0	6	2	5	8	0.0766667	YES
chr3	31710317	31712288	-	OSBPL10	1	0	4	0	8	0	5	8	0.336667	YES
chr7	106786907	106791366	+	PRKAR2B	1	0	4	1	3	4	5	8	0.36	YES
chr12	122748747	122750853	-	VPS33A	0	0	4	0	7	0	4	7	0.353333	YES
chrX	15343275	15344035	-	PIGA	0	0	4	0	7	0	4	7	-0.313333	YES
chr20	43353634	43355727	+	WISP2	4	7	3	6	11	0	14	17	-0.26	YES
chr2	64141422	64144033	-	VPS54	4	3	3	4	9	0	10	13	0	YES
chr18	8314856	8319175	+	PTPRM	0	1	3	2	5	0	4	7	0.133333	YES
chr11	124749472	124749682	+	ROBO3	3	0	3	3	6	0	6	9	0.7	YES
chr17	34964455	34964678	+	MRM1	2	0	3	1	7	0	5	8	2.79333	YES
chr18	56050552	56052757	+	NEDD4L	2	0	3	1	0	7	5	8	0.283333	YES
chr10	96271412	96281711	+	TBC1D12	1	0	3	4	3	0	4	7	0	YES
chr22	36691764	36692888	-	MYH9	1	0	3	0	7	0	4	7	-0.0333333	YES
chr9	135779205	135779797	-	TSC1	1	0	3	2	3	2	4	7	-2.77333	YES
chr11	9750999	9754075	+	SWAP70	0	0	3	5	0	1	3	6	0	YES
chr14	67346752	67382719	+	GPHN	0	0	3	1	4	1	3	6	-0.366667	YES
chr15	50518276	50519176	+	SLC27A2	0	0	3	4	2	0	3	6	-0.283333	YES
chr3	49308879	49311481	-	C3orf62	0	0	3	2	3	1	3	6	-1.26333	YES
chr7	100275039	100275120	+	GNB2	0	0	3	6	0	0	3	6	0.193333	YES
chr8	29931572	29940362	-	TMEM66	2	6	2	7	4	2	10	13	-0.15	YES
chrX	67494652	67502897	-	OPHN1	7	3	2	7	6	2	12	15	0	YES
chr13	75869150	75873465	-	TBC1D4	0	3	2	0	5	3	5	8	0	YES
chr10	76928417	76935823	+	SAMD8	8	2	2	6	9	0	12	15	-0.0833333	YES
chr1	168012379	168013822	+	DCAF6	3	2	2	2	4	4	7	10	0	YES
chr20	33642835	33645316	-	TRPC4AP	3	2	2	3	5	2	7	10	0	YES
chr10	74100929	74103123	-	DNAJB12	0	2	2	2	5	0	4	7	0	YES
chr14	60588018	60590935	+	C14orf135	4	1	2	5	4	1	7	10	0	YES
chr11	118359476	118360506	+	MLL	2	1	2	5	1	2	5	8	-0.223333	YES
chr14	64516595	64518274	+	SYNE2	1	1	2	5	2	0	4	7	0	YES
chr14	90759217	90764603	-	C14orf102	1	1	2	3	1	3	4	7	-0.583333	YES
chr16	11991739	11991850	-	GSPT1	1	1	2	5	1	1	4	7	0.123333	YES
chr7	65429446	65432717	-	GUSB	1	1	2	2	5	0	4	7	-0.483333	YES
chrX	41390463	41393958	-	CASK	1	1	2	5	2	0	4	7	-0.276667	YES
chr4	48567709	48569264	-	FRYL	0	1	2	0	5	1	3	6	0	YES
chr9	111665950	111668582	-	IKBKAP	0	1	2	3	2	1	3	6	0	YES
chrX	106882709	106884131	+	PRPS1	0	1	2	5	1	0	3	6	0.00333333	YES
chr16	67988677	67991644	-	SLC12A4	3	0	2	0	5	3	5	8	-0.326667	YES
chr1	10397592	10399826	+	KIF1B	2	0	2	1	6	0	4	7	-0.47	YES
chr1	19427068	19428013	-	UBR4	2	0	2	1	4	2	4	7	0.00333333	YES
chr16	10837923	10840999	+	NUBP1	2	0	2	4	3	0	4	7	0.446667	YES
chr22	22323148	22324581	-	TOP3B	2	0	2	3	0	4	4	7	-0.66	YES
chr10	75286539	75289437	-	USP54	1	0	2	0	4	2	3	6	3.22	YES
chr11	17553090	17554801	-	USH1C	1	0	2	5	1	0	3	6	0	YES
chr15	100214818	100215603	+	MEF2A	1	0	2	0	3	3	3	6	0	YES
chr2	198334896	198338480	+	COQ10B	1	0	2	0	6	0	3	6	0.746667	YES
chr20	62614569	62616259	+	PRPF6	1	0	2	2	4	0	3	6	0	YES
chr1	29581919	29585016	+	PTPRU	0	0	2	2	3	0	2	5	0	YES
chr11	14840756	14852243	+	PDE3B	0	0	2	0	5	0	2	5	0.176667	YES
chr12	8197555	8200477	+	FOXJ2	0	0	2	0	5	0	2	5	0	YES
chr15	41687243	41688684	-	NDUFAF1	0	0	2	0	5	0	2	5	-0.04	YES
chr2	201943746	201950181	+	NDUFB3	0	0	2	2	3	0	2	5	0	YES
chr3	40352548	40352960	+	EIF1B	0	0	2	0	4	1	2	5	-0.49	YES
chr5	141363118	141364367	+	RNF14	0	0	2	2	3	0	2	5	-0.00333333	YES
chr6	99819464	99823815	-	COQ3	0	0	2	1	4	0	2	5	0.0633333	YES
chr8	17871546	17872092	+	PCM1	0	0	2	2	3	0	2	5	0.0833333	YES
chr9	111640430	111640902	-	IKBKAP	0	0	2	4	0	1	2	5	0	YES
chr7	129040226	129043219	+	AHCYL2	1	4	1	2	5	2	6	9	0	YES
chr11	116636163	116640844	-	BUD13	4	3	1	1	7	3	8	11	0.666667	YES
chr3	4491025	4494559	-	SUMF1	2	3	1	2	2	5	6	9	0	YES
chr11	82698813	82705080	-	RAB30	1	3	1	0	8	0	5	8	0	YES
chr16	53297010	53301205	+	CHD9	1	3	1	6	0	2	5	8	-0.283333	YES
chr5	78746945	78752684	-	HOMER1	0	3	1	1	2	4	4	7	0	YES
chr1	114189265	114191858	+	MAGI3	2	2	1	0	5	3	5	8	0	YES
chr16	53488755	53493362	+	RBL2	2	2	1	4	4	0	5	8	0	YES
chr22	32211199	32215007	+	DEPDC5	2	2	1	0	8	0	5	8	0	YES
chr3	195053853	195057660	-	ACAP2	2	2	1	2	4	2	5	8	0.57	YES
chr6	146214530	146215285	-	SHPRH	2	2	1	2	5	1	5	8	-1.28333	YES
chr1	29587416	29601959	+	PTPRU	1	2	1	2	4	1	4	7	0	YES
chr2	37259917	37264997	-	HEATR5B	1	2	1	1	6	0	4	7	0	YES
chr18	33726012	33726212	+	ELP2	0	2	1	0	4	2	3	6	0.00333333	YES
chr2	135075177	135076220	+	MGAT5	0	2	1	1	4	1	3	6	0	YES
chr1	173810112	173814366	+	DARS2	4	1	1	1	8	0	6	9	-0.253333	YES
chr1	100127956	100133197	+	PALMD	2	1	1	1	3	3	4	7	0	YES
chr15	48782276	48784657	-	FBN1	1	1	1	0	4	2	3	6	0	YES
chr11	118926556	118926781	-	HYOU1	0	1	1	3	2	0	2	5	-0.166667	YES
chr14	64554575	64556291	+	SYNE2	0	1	1	1	4	0	2	5	0.596667	YES
chr18	55989719	55990463	+	NEDD4L	0	1	1	1	3	1	2	5	0	YES
chr8	67710861	67716609	+	SGK3	4	0	1	0	8	0	5	8	-0.853333	YES
chr2	8952624	8953366	-	KIDINS220	3	0	1	3	2	2	4	7	0	YES
chr8	6296618	6299587	+	MCPH1	3	0	1	3	4	0	4	7	-0.24	YES
chr12	100994329	100995415	+	GAS2L3	2	0	1	3	3	0	3	6	0	YES
chr12	120210715	120213589	-	CIT	2	0	1	3	3	0	3	6	0	YES
chr12	124172725	124175079	+	TCTN2	2	0	1	2	4	0	3	6	0	YES
chr17	40618526	40620027	+	ATP6V0A1	2	0	1	2	2	2	3	6	-0.126667	YES
chr18	29098238	29099765	+	DSG2	2	0	1	0	4	2	3	6	0	YES
chr2	209203293	209204141	+	PIKFYVE	2	0	1	0	6	0	3	6	0	YES
chr20	46252828	46254124	+	NCOA3	2	0	1	1	5	0	3	6	-0.263333	YES
chr4	103590207	103592437	-	MANBA	2	0	1	4	2	0	3	6	0	YES
chr5	138773248	138775094	-	DNAJC18	2	0	1	0	6	0	3	6	0	YES
chr7	47440056	47440381	-	TNS3	2	0	1	5	1	0	3	6	0	YES
chr8	105511748	105521166	-	LRP12	2	0	1	1	5	0	3	6	0	YES
chr8	134270670	134271410	-	NDRG1	2	0	1	1	5	0	3	6	0	YES
chr13	47297466	47302981	+	LRCH1	1	0	1	1	4	0	2	5	0	YES
chr16	75270897	75271080	-	BCAR1	1	0	1	3	2	0	2	5	-0.263333	YES
chr18	61160329	61166352	+	SERPINB5	1	0	1	0	4	1	2	5	-0.113333	YES
chr20	33077192	33077626	+	ITCH	1	0	1	0	5	0	2	5	0	YES
chr6	149900110	149900969	+	C6orf72	1	0	1	3	0	2	2	5	-0.04	YES
chr8	59510462	59511790	-	NSMAF	1	0	1	0	5	0	2	5	0.216667	YES
chr1	235605198	235606166	+	TBCE	0	0	1	0	4	0	1	4	0	YES
chr10	17196734	17199439	-	TRDMT1	0	0	1	1	3	0	1	4	0	YES
chr10	75558212	75558759	+	KIAA0913	0	0	1	0	1	3	1	4	-1.43667	YES
chr10	104183330	104183413	-	CUEDC2	0	0	1	0	4	0	1	4	-0.0766667	YES
chr11	118416569	118422500	-	IFT46	0	0	1	4	0	0	1	4	0	YES
chr12	97328984	97330388	+	NEDD1	0	0	1	1	2	1	1	4	-0.0766667	YES
chr12	104460094	104461724	+	HCFC2	0	0	1	1	2	1	1	4	0	YES
chr13	21148615	21157095	+	IFT88	0	0	1	2	0	2	1	4	0	YES
chr13	79951651	79952923	-	RBM26	0	0	1	0	4	0	1	4	0	YES
chr16	88907503	88908304	-	GALNS	0	0	1	0	2	2	1	4	0.0533333	YES
chr17	4880488	4881798	-	CAMTA2	0	0	1	4	0	0	1	4	0.753333	YES
chr17	9613432	9615284	+	USP43	0	0	1	2	2	0	1	4	0	YES
chr17	78082209	78082287	+	GAA	0	0	1	0	2	2	1	4	-1.13333	YES
chr19	7925576	7926763	+	EVI5L	0	0	1	0	4	0	1	4	-0.316667	YES
chr19	17326317	17326610	+	USE1	0	0	1	0	4	0	1	4	-1.6	YES
chr19	44050259	44050746	-	XRCC1	0	0	1	4	0	0	1	4	0.946667	YES
chr2	120885428	120889193	+	EPB41L5	0	0	1	0	2	2	1	4	0	YES
chr22	37453534	37455352	+	KCTD17	0	0	1	1	3	0	1	4	0	YES
chr3	51679780	51680300	+	RAD54L2	0	0	1	1	2	1	1	4	0	YES
chr3	137805866	137807220	-	DZIP1L	0	0	1	0	4	0	1	4	0	YES
chr4	3180174	3182241	+	HTT	0	0	1	0	3	1	1	4	0.853333	YES
chr6	13801622	13802474	-	CCDC90A	0	0	1	4	0	0	1	4	0.133333	YES
chr7	30821829	30825364	+	FAM188B	0	0	1	0	4	0	1	4	0	YES
chr8	21938705	21938860	+	EPB49	0	0	1	3	1	0	1	4	-0.07	YES
chr9	86399754	86403515	-	GKAP1	0	0	1	3	1	0	1	4	0	YES
chrX	24544392	24545690	+	PDK3	0	0	1	0	4	0	1	4	0	YES
chr1	173814430	173819464	+	DARS2	3	5	0	1	8	2	8	11	-0.3	YES
chr3	48209435	48215773	-	CDC25A	3	4	0	6	3	1	7	10	0.15	YES
chr1	222902171	222902961	+	C1orf58	4	3	0	0	10	0	7	10	0.27	YES
chr12	105255149	105260209	-	SLC41A2	0	3	0	3	0	3	3	6	0	YES
chr2	141272342	141274457	-	LRP1B	0	3	0	1	3	2	3	6	0	YES
chr4	151749774	151752968	-	LRBA	0	3	0	0	4	2	3	6	0	YES
chr6	146244922	146245874	-	SHPRH	0	3	0	2	4	0	3	6	-0.583333	YES
chr2	136467107	136467628	+	R3HDM1	2	2	0	2	5	0	4	7	0.11	YES
chr6	75811769	75812312	-	COL12A1	0	2	0	4	1	0	2	5	0	YES
chr6	159407454	159414870	-	RSPH3	0	2	0	1	3	1	2	5	-0.223333	YES
chr10	12126751	12129533	+	DHTKD1	3	1	0	1	1	5	4	7	0.326667	YES
chr10	116606993	116608405	+	FAM160B1	3	1	0	3	4	0	4	7	0.46	YES
chr16	50815323	50816235	+	CYLD	2	1	0	0	6	0	3	6	-0.07	YES
chr6	135768299	135769427	-	AHI1	2	1	0	1	4	1	3	6	0	YES
chr8	42720633	42725146	-	RNF170	2	1	0	3	2	1	3	6	-0.53	YES
chr10	12142262	12143040	+	DHTKD1	1	1	0	4	1	0	2	5	0.3	YES
chr17	4877065	4877679	-	CAMTA2	1	1	0	3	2	0	2	5	2.49	YES
chr18	56648850	56651203	+	ZNF532	1	1	0	0	5	0	2	5	0.913333	YES
chr20	39798167	39798751	+	PLCG1	1	1	0	0	5	0	2	5	-0.34	YES
chr21	40883737	40887014	+	SH3BGR	1	1	0	0	5	0	2	5	0.356667	YES
chr3	182597438	182598666	+	ATP11B	1	1	0	2	3	0	2	5	0	YES
chrX	129790670	129799616	-	ENOX2	1	1	0	0	3	2	2	5	0	YES
chr1	62235095	62237102	+	INADL	0	1	0	1	2	1	1	4	0	YES
chr1	151754064	151755374	-	TDRKH	0	1	0	3	1	0	1	4	0	YES
chr13	24433052	24436440	-	MIPEP	0	1	0	2	2	0	1	4	0	YES
chr15	76189403	76191767	+	UBE2Q2	0	1	0	2	2	0	1	4	0.453333	YES
chr17	27209256	27209354	-	FLOT2	0	1	0	4	0	0	1	4	-0.08	YES
chr17	53150438	53155438	+	STXBP4	0	1	0	3	0	1	1	4	0	YES
chr19	9009713	9010647	-	MUC16	0	1	0	0	4	0	1	4	-0.853333	YES
chr19	43967922	43968476	-	LYPD3	0	1	0	4	0	0	1	4	-0.363333	YES
chr2	152127390	152128139	-	NMI	0	1	0	3	1	0	1	4	-0.166667	YES
chr20	35316016	35317081	-	NDRG3	0	1	0	0	3	1	1	4	0	YES
chr3	120169594	120169743	-	FSTL1	0	1	0	3	1	0	1	4	0.386667	YES
chr4	102816568	102839149	+	BANK1	0	1	0	2	2	0	1	4	0	YES
chr6	129899750	129901214	-	ARHGAP18	0	1	0	0	4	0	1	4	0.256667	YES
chr7	73526038	73526262	+	LIMK1	0	1	0	4	0	0	1	4	0	YES
chrX	38134400	38135839	-	RPGR	0	1	0	3	0	1	1	4	-1.94667	YES
chrX	100653935	100655653	-	GLA	0	1	0	0	4	0	1	4	-0.476667	YES
chr1	84644922	84647882	+	PRKACB	3	0	0	3	3	0	3	6	0	YES
chr5	76733250	76734064	-	WDR41	3	0	0	0	6	0	3	6	0.0766667	YES
chr1	54653413	54656420	-	CYB5RL	2	0	0	5	0	0	2	5	4.24333	YES
chr11	75134925	75136437	-	KLHL35	2	0	0	0	5	0	2	5	0.71	YES
chr2	24965056	24974850	+	NCOA1	2	0	0	4	1	0	2	5	0	YES
chr3	108327006	108330020	+	DZIP3	2	0	0	5	0	0	2	5	0	YES
chr3	132165395	132166164	+	DNAJC13	2	0	0	3	1	1	2	5	0	YES
chr8	48874967	48875323	+	MCM4	2	0	0	1	2	2	2	5	0.00666667	YES
chrX	40456917	40457932	+	ATP6AP2	2	0	0	5	0	0	2	5	0.04	YES
chr1	11317223	11318541	-	MTOR	1	0	0	1	3	0	1	4	0	YES
chr1	110587528	110587636	+	FAM40A	1	0	0	0	0	4	1	4	-0.22	YES
chr10	11371061	11372418	+	CELF2	1	0	0	0	4	0	1	4	6.94	YES
chr10	27302040	27303422	-	ANKRD26	1	0	0	2	2	0	1	4	-0.643333	YES
chr11	111835403	111839236	+	DIXDC1	1	0	0	0	4	0	1	4	0	YES
chr13	32969071	32971034	+	BRCA2	1	0	0	1	3	0	1	4	0	YES
chr15	62241805	62242556	-	VPS13C	1	0	0	2	1	1	1	4	0	YES
chr16	2282910	2283011	+	E4F1	1	0	0	4	0	0	1	4	0.73	YES
chr18	21646105	21649120	+	TTC39C	1	0	0	0	4	0	1	4	0	YES
chr19	48216796	48219814	+	EHD2	1	0	0	4	0	0	1	4	0	YES
chr2	163130455	163133196	-	IFIH1	1	0	0	2	0	2	1	4	-1.02667	YES
chr20	6075636	6077548	-	FERMT1	1	0	0	0	4	0	1	4	0.423333	YES
chr3	20161216	20164159	+	KAT2B	1	0	0	0	4	0	1	4	0	YES
chr3	129279278	129279531	-	PLXND1	1	0	0	0	4	0	1	4	-3.67667	YES
chr4	187130427	187131622	+	CYP4V2	1	0	0	0	4	0	1	4	-0.9	YES
chr6	13316941	13321139	-	TBC1D7	1	0	0	0	2	2	1	4	-0.206667	YES
chr9	20981686	20982355	+	KIAA1797	1	0	0	3	0	1	1	4	0.08	YES
chr9	125616546	125616809	-	RC3H2	1	0	0	4	0	0	1	4	-0.286667	YES
chr1	3410464	3410559	-	MEGF6	0	0	0	0	3	0	0	3	-3.55	YES
chr1	17319077	17320123	-	ATP13A2	0	0	0	0	3	0	0	3	-0.316667	YES
chr1	21943985	21944426	-	RAP1GAP	0	0	0	3	0	0	0	3	0	YES
chr1	26514995	26515088	+	CNKSR1	0	0	0	0	2	1	0	3	-2.30667	YES
chr1	204115893	204118830	-	ETNK2	0	0	0	0	2	1	0	3	0	YES
chr1	235383861	235384879	-	ARID4B	0	0	0	1	2	0	0	3	0	YES
chr10	74916414	74920191	-	ECD	0	0	0	3	0	0	0	3	0.123333	YES
chr11	4103582	4104111	+	STIM1	0	0	0	3	0	0	0	3	0	YES
chr11	59368347	59368755	-	OSBP	0	0	0	2	1	0	0	3	0	YES
chr11	64566952	64567076	-	MAP4K2	0	0	0	0	3	0	0	3	0	YES
chr11	122666985	122667618	+	UBASH3B	0	0	0	2	0	1	0	3	0	YES
chr11	124518072	124519514	-	SIAE	0	0	0	0	3	0	0	3	-0.173333	YES
chr12	3030089	3031427	+	TULP3	0	0	0	0	1	2	0	3	0	YES
chr12	7168182	7169055	+	C1S	0	0	0	0	2	1	0	3	0.456667	YES
chr12	12483893	12491353	-	MANSC1	0	0	0	2	1	0	0	3	0.54	YES
chr12	27081219	27081635	-	C12orf11	0	0	0	0	3	0	0	3	0	YES
chr12	44190901	44191104	-	TWF1	0	0	0	0	3	0	0	3	-0.03	YES
chr12	93870794	93873163	+	MRPL42	0	0	0	3	0	0	0	3	0	YES
chr12	124191621	124192150	+	TCTN2	0	0	0	2	1	0	0	3	-1.73667	YES
chr13	49050980	49051490	+	RB1	0	0	0	0	1	2	0	3	0	YES
chr13	77625298	77625945	-	MYCBP2	0	0	0	1	0	2	0	3	0	YES
chr13	114202768	114203739	+	TMCO3	0	0	0	0	3	0	0	3	-1.06	YES
chr14	77909006	77909461	-	VIPAR	0	0	0	0	0	3	0	3	0	YES
chr14	81964839	81965802	-	SEL1L	0	0	0	2	1	0	0	3	0	YES
chr14	92454728	92460152	-	TRIP11	0	0	0	2	0	1	0	3	0	YES
chr15	44858504	44859621	-	SPG11	0	0	0	1	1	1	0	3	-1.60667	YES
chr15	45954324	45962125	+	SQRDL	0	0	0	3	0	0	0	3	0	YES
chr15	76994207	76995190	-	SCAPER	0	0	0	0	3	0	0	3	0	YES
chr16	1634422	1636130	-	IFT140	0	0	0	3	0	0	0	3	-1.85333	YES
chr17	6513481	6515238	-	KIAA0753	0	0	0	2	1	0	0	3	0	YES
chr17	19689400	19698934	-	ULK2	0	0	0	0	3	0	0	3	0	YES
chr17	27185505	27185593	+	ERAL1	0	0	0	0	3	0	0	3	0.333333	YES
chr17	28766096	28769325	+	CPD	0	0	0	2	1	0	0	3	0	YES
chr17	40864504	40865226	-	EZH1	0	0	0	0	3	0	0	3	-0.196667	YES
chr17	43308055	43309733	+	FMNL1	0	0	0	0	2	1	0	3	0.1	YES
chr17	47389405	47390059	-	ZNF652	0	0	0	0	3	0	0	3	-1.85333	YES
chr17	80386522	80391533	+	HEXDC	0	0	0	2	1	0	0	3	-1.15	YES
chr19	8923899	8931855	-	ZNF558	0	0	0	0	0	3	0	3	0	YES
chr19	39380785	39384053	-	SIRT2	0	0	0	2	1	0	0	3	-0.253333	YES
chr2	24426653	24427113	-	ITSN2	0	0	0	0	3	0	0	3	1.81	YES
chr2	72725681	72727029	-	EXOC6B	0	0	0	2	1	0	0	3	0	YES
chr2	187533648	187534427	+	ITGAV	0	0	0	2	1	0	0	3	0	YES
chr20	330008	330281	+	NRSN2	0	0	0	3	0	0	0	3	-0.433333	YES
chr20	47342929	47351082	-	PREX1	0	0	0	0	2	1	0	3	0	YES
chr20	48503436	48504365	+	SLC9A8	0	0	0	0	3	0	0	3	-2.73333	YES
chr21	46914830	46915271	+	COL18A1	0	0	0	1	2	0	0	3	0.33	YES
chr22	19435069	19435187	-	C22orf39	0	0	0	3	0	0	0	3	-4.20667	YES
chr3	12198435	12198884	-	TIMP4	0	0	0	3	0	0	0	3	0	YES
chr3	44854673	44856402	+	KIF15	0	0	0	3	0	0	0	3	0	YES
chr3	123456391	123457743	-	MYLK	0	0	0	0	3	0	0	3	0	YES
chr3	145789211	145790347	-	PLOD2	0	0	0	0	3	0	0	3	0	YES
chr3	170841492	170843700	-	TNIK	0	0	0	0	0	3	0	3	0	YES
chr3	182605502	182607197	+	ATP11B	0	0	0	2	1	0	0	3	0	YES
chr3	182763329	182769946	-	MCCC1	0	0	0	0	3	0	0	3	0	YES
chr3	194150911	194151001	-	ATP13A3	0	0	0	0	0	3	0	3	0	YES
chr3	195605464	195605919	-	TNK2	0	0	0	0	1	2	0	3	-0.48	YES
chr4	57189734	57190269	+	KIAA1211	0	0	0	3	0	0	0	3	0	YES
chr4	89304533	89306650	+	HERC6	0	0	0	3	0	0	0	3	0	YES
chr4	89326766	89329675	+	HERC6	0	0	0	1	2	0	0	3	0	YES
chr4	123184139	123184596	+	KIAA1109	0	0	0	0	3	0	0	3	0	YES
chr4	169201742	169204596	-	DDX60	0	0	0	2	1	0	0	3	0	YES
chr4	183658229	183659553	+	ODZ3	0	0	0	0	3	0	0	3	-0.9	YES
chr5	79968180	79968559	+	MSH3	0	0	0	0	3	0	0	3	0	YES
chr5	94877611	94878887	-	TTC37	0	0	0	0	3	0	0	3	0	YES
chr5	118809711	118810095	+	HSD17B4	0	0	0	2	1	0	0	3	-0.0366667	YES
chr6	7187757	7189391	+	RREB1	0	0	0	1	2	0	0	3	0	YES
chr6	36177693	36177992	+	BRPF3	0	0	0	3	0	0	0	3	-0.743333	YES
chr6	109787778	109788855	-	ZBTB24	0	0	0	1	2	0	0	3	-0.92	YES
chr7	8261029	8268230	-	ICA1	0	0	0	0	3	0	0	3	0	YES
chr7	56079563	56082715	-	PSPH	0	0	0	0	3	0	0	3	0.00666667	YES
chr8	42828543	42829249	+	HOOK3	0	0	0	3	0	0	0	3	0	YES
chr8	110567117	110569163	+	EBAG9	0	0	0	0	2	1	0	3	0	YES
chr8	126059574	126061247	-	KIAA0196	0	0	0	3	0	0	0	3	0	YES
chr9	123924550	123927220	+	CEP110	0	0	0	3	0	0	0	3	1.32	YES
chrX	101855961	101856391	+	ARMCX5	0	0	0	0	2	1	0	3	1.22333	YES
chrX	108779207	108780165	+	NXT2	0	0	0	0	3	0	0	3	-3.55333	YES
chr9	133370411	133374891	+	ASS1	11	14	23	18	29	3	48	50	0.01	YES
chr2	192141757	192160836	+	MYO1B	5	1	17	11	14	0	23	25	0	YES
chr2	192543855	192546671	+	OBFC2A	3	8	13	13	7	6	24	26	-0.4	YES
chr1	206594626	206603511	+	SRGAP2	0	7	9	4	11	3	16	18	0	YES
chr1	234546278	234553829	-	TARBP1	8	5	9	9	15	0	22	24	-0.01	YES
chr4	142142263	142143519	+	ZNF330	1	5	9	0	9	8	15	17	-0.92	YES
chr4	103561015	103571693	-	MANBA	4	3	9	6	12	0	16	18	0	YES
chr10	32311965	32317355	-	KIF5B	3	1	9	3	12	0	13	15	0.0466667	YES
chr20	57014082	57015962	+	VAPB	7	2	8	8	9	2	17	19	0.0833333	YES
chr9	33354186	33354848	+	NFX1	0	0	8	9	1	0	8	10	0.52	YES
chr11	58940280	58949211	+	DTX4	2	2	7	4	9	0	11	13	0.63	YES
chr9	135772998	135776101	-	TSC1	0	2	7	4	5	2	9	11	0.336667	YES
chr14	52466515	52468515	+	C14orf166	3	0	7	4	6	2	10	12	-0.496667	YES
chrX	119738103	119739261	+	MCTS1	3	0	7	2	3	7	10	12	0.02	YES
chr3	128351001	128356641	-	RPN1	2	6	6	0	12	4	14	16	0	YES
chr3	142499872	142503545	+	TRPC1	7	5	6	6	10	4	18	20	-6.73333	YES
chr2	10188723	10192353	+	KLF11	2	2	6	8	1	3	10	12	-0.196667	YES
chr7	142982539	142983033	+	TMEM139	5	1	6	2	11	1	12	14	-0.213333	YES
chr15	35168208	35174702	-	AQR	3	1	6	1	8	3	10	12	0	YES
chr11	113639690	113644283	-	ZW10	2	1	6	1	7	3	9	11	0	YES
chr5	138283163	138286859	-	SIL1	1	1	6	3	6	1	8	10	0.06	YES
chr5	138749962	138755741	-	DNAJC18	0	0	6	2	6	0	6	8	-0.736667	YES
chr3	93762085	93768249	+	ARL13B	2	4	5	4	6	3	11	13	-0.176667	YES
chr7	129079933	129083864	+	FAM40B	6	3	5	6	6	4	14	16	0	YES
chr14	54976782	54989171	+	CGRRF1	1	3	5	3	6	2	9	11	0	YES
chr1	94337793	94338674	-	DNTTIP2	2	0	5	5	1	3	7	9	-0.0866667	YES
chr11	122647919	122650204	+	UBASH3B	2	0	5	4	5	0	7	9	0	YES
chr1	35476638	35477490	-	ZMYM6	1	0	5	3	4	1	6	8	0.67	YES
chr21	33074232	33074556	-	SFRS15	0	6	4	1	4	7	10	12	-0.746667	YES
chr1	84387078	84394818	-	TTLL7	2	5	4	2	6	5	11	13	0	YES
chr2	234396951	234398010	-	USP40	0	5	4	1	10	0	9	11	0.563333	YES
chr12	76796547	76804343	-	OSBPL8	1	3	4	5	3	2	8	10	-0.143333	YES
chr17	49350812	49353226	+	UTP18	1	2	4	2	3	4	7	9	0	YES
chr19	48647221	48653019	-	LIG1	7	1	4	7	7	0	12	14	0.02	YES
chr14	96846126	96848583	+	C14orf129	4	1	4	1	10	0	9	11	-0.31	YES
chr18	8380426	8384558	+	PTPRM	2	1	4	3	2	4	7	9	-0.14	YES
chr7	2692645	2695725	+	TTYH3	1	1	4	2	4	2	6	8	-0.866667	YES
chr2	27695230	27699507	-	IFT172	0	1	4	2	5	0	5	7	-1.5	YES
chr3	156867959	156868070	-	CCNL1	0	1	4	6	1	0	5	7	1.1	YES
chr5	76729113	76732085	-	WDR41	0	1	4	1	2	4	5	7	0.193333	YES
chr3	182759539	182763200	-	MCCC1	4	0	4	3	5	2	8	10	0	YES
chr3	132247177	132249841	+	DNAJC13	3	0	4	1	7	1	7	9	0	YES
chr5	78612134	78617428	+	JMY	3	0	4	2	6	1	7	9	3.71333	YES
chr3	46935500	46937224	+	PTH1R	2	0	4	3	5	0	6	8	-0.18	YES
chr7	29112040	29126099	-	CPVL	2	0	4	1	7	0	6	8	0	YES
chr1	228511308	228520560	+	OBSCN	1	0	4	4	3	0	5	7	0	YES
chr6	108366045	108370456	-	OSTM1	1	0	4	1	4	2	5	7	0	YES
chr9	4561542	4564343	+	SLC1A1	1	0	4	3	2	2	5	7	-0.253333	YES
chr9	36234130	36236828	-	GNE	1	0	4	2	5	0	5	7	1.36	YES
chr12	115115462	115117309	-	TBX3	0	0	4	3	3	0	4	6	-0.87	YES
chr13	95839147	95840706	-	ABCC4	0	0	4	2	4	0	4	6	0	YES
chr3	141290397	141291450	+	RASA2	0	0	4	1	5	0	4	6	0	YES
chr4	89658707	89660180	-	FAM13A	0	0	4	2	4	0	4	6	0	YES
chr3	97608235	97611703	+	CRYBG3	3	5	3	1	2	10	11	13	0.9	YES
chr4	129100668	129120593	+	LARP1B	3	5	3	1	8	4	11	13	1.75333	YES
chr5	74801942	74806936	-	COL4A3BP	5	3	3	4	3	6	11	13	0	YES
chr5	93805817	93807170	-	C5orf36	1	3	3	3	6	0	7	9	-0.71	YES
chr12	113818648	113821909	+	PLBD2	0	3	3	0	8	0	6	8	0	YES
chr4	110412564	110415770	+	SEC24B	4	2	3	0	9	2	9	11	0	YES
chr14	35050807	35055435	-	SNX6	2	2	3	2	3	4	7	9	0	YES
chr14	73754023	73759441	-	NUMB	1	2	3	4	1	3	6	8	-0.133333	YES
chr2	230655968	230656581	-	TRIP12	1	2	3	1	3	4	6	8	0	YES
chr12	123485706	123488940	-	PITPNM2	0	2	3	3	4	0	5	7	0	YES
chr4	56230439	56233754	+	SRD5A3	0	2	3	0	7	0	5	7	-0.193333	YES
chr9	5050832	5054562	+	JAK2	3	1	3	3	4	2	7	9	0	YES
chr1	173939756	173941646	-	RC3H1	2	1	3	2	4	2	6	8	0	YES
chr5	64954329	64956525	+	C5orf44	2	1	3	0	8	0	6	8	0.666667	YES
chr12	30809685	30814074	-	IPO8	1	1	3	1	3	3	5	7	-0.0533333	YES
chr15	59384840	59386981	+	RNF111	1	1	3	3	3	1	5	7	0.116667	YES
chr5	68581295	68588014	-	CCDC125	0	1	3	1	4	1	4	6	-0.433333	YES
chr1	169437491	169437881	-	SLC19A2	4	0	3	3	4	2	7	9	-0.453333	YES
chr11	65035040	65036142	+	POLA2	3	0	3	0	8	0	6	8	-0.27	YES
chr16	47628126	47630283	+	PHKB	2	0	3	0	7	0	5	7	0	YES
chr14	20927600	20927786	-	TMEM55B	1	0	3	4	1	1	4	6	-3.91667	YES
chr18	688609	690548	-	ENOSF1	1	0	3	0	2	4	4	6	0	YES
chr2	171818260	171819348	+	GORASP2	1	0	3	1	5	0	4	6	0	YES
chr21	44438341	44441412	+	PKNOX1	1	0	3	6	0	0	4	6	-0.0733333	YES
chr3	183700413	183700561	-	ABCC5	1	0	3	5	0	1	4	6	1.44333	YES
chr7	138593868	138595891	-	KIAA1549	1	0	3	0	5	1	4	6	0	YES
chr1	155298067	155300193	+	RUSC1	0	0	3	0	5	0	3	5	0.0966667	YES
chr12	102142970	102147149	-	GNPTAB	0	0	3	3	0	2	3	5	0.123333	YES
chr14	55433325	55433997	-	WDHD1	0	0	3	0	5	0	3	5	0	YES
chr18	77104355	77105427	+	ATP9B	0	0	3	0	5	0	3	5	0	YES
chr3	33441775	33442453	-	UBP1	0	0	3	2	3	0	3	5	0	YES
chr6	52945897	52947301	+	FBXO9	0	0	3	1	2	2	3	5	0	YES
chr7	56132072	56136174	+	SUMF2	0	0	3	2	3	0	3	5	0.103333	YES
chrX	149896264	149898580	+	MTMR1	0	0	3	1	4	0	3	5	-0.163333	YES
chrX	153648604	153648996	+	TAZ	0	0	3	2	3	0	3	5	-0.346667	YES
chr10	29852222	29858183	-	SVIL	8	5	2	6	8	3	15	17	0	YES
chr16	68200919	68208276	+	NFATC3	6	5	2	8	6	1	13	15	0	YES
chr10	49632629	49633930	+	MAPK8	5	5	2	7	7	0	12	14	2.75	YES
chr11	118130917	118133152	-	MPZL2	2	3	2	0	8	1	7	9	-0.436667	YES
chr1	151317665	151318403	-	RFX5	0	3	2	4	2	1	5	7	-0.0866667	YES
chr9	86357516	86363223	-	GKAP1	0	3	2	4	3	0	5	7	0.423333	YES
chr18	19146168	19147940	-	ESCO1	4	2	2	2	8	0	8	10	0	YES
chr7	24854823	24856228	-	OSBPL3	4	2	2	0	9	1	8	10	0.163333	YES
chr5	16481203	16483454	-	FAM134B	3	2	2	6	3	0	7	9	0.433333	YES
chr19	17405655	17411664	-	ABHD8	2	2	2	0	7	1	6	8	-0.62	YES
chr3	132406071	132407493	-	NPHP3	1	2	2	1	5	1	5	7	1.15	YES
chr4	84509453	84511351	+	AGPAT9	0	2	2	1	4	1	4	6	0	YES
chr2	200801216	200803655	-	C2orf60	4	1	2	1	4	4	7	9	34.3867	YES
chr8	134254318	134256597	-	NDRG1	4	1	2	1	6	2	7	9	-0.656667	YES
chr1	52486685	52489162	-	TXNDC12	3	1	2	0	6	2	6	8	0.07	YES
chr2	88874965	88876071	-	EIF2AK3	3	1	2	3	3	2	6	8	0	YES
chr11	126174177	126176464	+	DCPS	1	1	2	0	6	0	4	6	-0.236667	YES
chr17	62547823	62550973	-	SMURF2	1	1	2	1	3	2	4	6	0.27	YES
chr3	52941750	52945018	-	SFMBT1	1	1	2	0	3	3	4	6	0.156667	YES
chr5	114462555	114466288	-	TRIM36	1	1	2	4	0	2	4	6	1.57	YES
chr6	84859423	84862263	-	KIAA1009	1	1	2	0	6	0	4	6	0	YES
chr9	131733238	131735438	+	NUP188	1	1	2	3	3	0	4	6	-0.05	YES
chr10	91152475	91162037	+	IFIT1	0	1	2	0	5	0	3	5	0	YES
chr12	124203249	124206897	+	ATP6V0A2	0	1	2	1	2	2	3	5	0	YES
chr14	90455435	90456060	+	TDP1	0	1	2	5	0	0	3	5	0	YES
chr17	2201350	2202199	-	SMG6	0	1	2	0	5	0	3	5	0	YES
chr17	46020797	46021981	+	PNPO	0	1	2	3	2	0	3	5	-0.186667	YES
chr2	88478533	88482217	+	THNSL2	0	1	2	0	5	0	3	5	-1.07667	YES
chrX	153063270	153063525	+	SSR4	0	1	2	0	5	0	3	5	0.06	YES
chr4	728817	731254	+	PCGF3	4	0	2	2	5	1	6	8	0	YES
chr9	3275613	3277339	-	RFX3	4	0	2	3	3	2	6	8	0	YES
chr9	130219673	130221281	+	LRSAM1	4	0	2	0	3	5	6	8	0.343333	YES
chr14	91745651	91747800	-	CCDC88C	3	0	2	3	4	0	5	7	0	YES
chr19	33075918	33076721	+	PDCD5	3	0	2	1	6	0	5	7	0.103333	YES
chr1	169831939	169833509	-	SCYL3	2	0	2	2	1	3	4	6	3.60333	YES
chr12	19489551	19496256	+	PLEKHA5	2	0	2	3	3	0	4	6	0	YES
chr14	56138596	56139347	+	KTN1	2	0	2	1	5	0	4	6	-0.01	YES
chr4	1695441	1696500	-	SLBP	2	0	2	2	1	3	4	6	0.3	YES
chr5	37014868	37016139	+	NIPBL	2	0	2	2	2	2	4	6	0	YES
chr7	116774247	116776134	+	ST7	2	0	2	1	5	0	4	6	0	YES
chr10	73520682	73521354	-	C10orf54	1	0	2	4	1	0	3	5	0.31	YES
chr10	93601206	93601928	+	TNKS2	1	0	2	4	1	0	3	5	0.176667	YES
chr11	121445073	121447989	+	SORL1	1	0	2	0	2	3	3	5	0	YES
chr12	94805624	94806093	-	CCDC41	1	0	2	1	4	0	3	5	0	YES
chr2	27672430	27672557	-	IFT172	1	0	2	3	0	2	3	5	0.546667	YES
chr2	217300220	217303142	+	SMARCAL1	1	0	2	2	3	0	3	5	-0.296667	YES
chr3	53139820	53140834	-	RFT1	1	0	2	0	5	0	3	5	0	YES
chr4	57890279	57891051	+	POLR2B	1	0	2	3	1	1	3	5	-0.146667	YES
chr5	50124219	50125725	+	PARP8	1	0	2	1	1	3	3	5	0.483333	YES
chr5	156788607	156809597	+	CYFIP2	1	0	2	0	5	0	3	5	-0.776667	YES
chr5	179734304	179739429	-	GFPT2	1	0	2	1	2	2	3	5	0.393333	YES
chr1	32557613	32560384	+	TMEM39B	0	0	2	4	0	0	2	4	0	YES
chr10	74322822	74326390	-	CBARA1	0	0	2	3	0	1	2	4	0	YES
chr12	461491	463241	-	KDM5A	0	0	2	2	0	2	2	4	0	YES
chr12	120615556	120616427	-	GCN1L1	0	0	2	3	0	1	2	4	0	YES
chr15	43328792	43329970	-	UBR1	0	0	2	4	0	0	2	4	0	YES
chr16	23456486	23457133	-	COG7	0	0	2	4	0	0	2	4	0	YES
chr16	57159906	57161760	+	CPNE2	0	0	2	3	1	0	2	4	0	YES
chr19	46506425	46506676	+	CCDC61	0	0	2	0	4	0	2	4	-3.44	YES
chr2	75107697	75108837	+	HK2	0	0	2	4	0	0	2	4	0	YES
chr2	158142647	158152174	+	GALNT5	0	0	2	2	2	0	2	4	0	YES
chr2	209219370	209219913	+	PIKFYVE	0	0	2	2	2	0	2	4	-0.463333	YES
chr20	3017936	3018704	+	PTPRA	0	0	2	0	3	1	2	4	-0.216667	YES
chr21	37760029	37763848	+	CHAF1B	0	0	2	2	1	1	2	4	-0.19	YES
chr3	105271027	105271311	+	ALCAM	0	0	2	0	4	0	2	4	0	YES
chr3	196033884	196042968	-	TCTEX1D2	0	0	2	0	4	0	2	4	0.196667	YES
chr4	56878152	56883813	+	CEP135	0	0	2	1	3	0	2	4	0	YES
chr7	56144583	56145794	+	SUMF2	0	0	2	3	1	0	2	4	0.02	YES
chr8	61734487	61734582	+	CHD7	0	0	2	1	3	0	2	4	0	YES
chrX	70346983	70347185	+	MED12	0	0	2	0	3	1	2	4	-0.186667	YES
chr1	46290253	46295110	+	MAST2	1	4	1	1	7	0	6	8	0	YES
chr14	55619366	55621334	-	DLGAP5	0	4	1	4	3	0	5	7	0	YES
chr22	21237858	21241966	+	SNAP29	0	4	1	4	0	3	5	7	0.03	YES
chr21	38460647	38461098	+	TTC3	2	3	1	0	4	4	6	8	0	YES
chr4	39293473	39297233	-	RFC1	2	3	1	2	3	3	6	8	0.106667	YES
chr10	29759413	29760066	-	SVIL	0	3	1	2	4	0	4	6	-3.13	YES
chr2	173423578	173426947	+	PDK1	0	3	1	3	2	1	4	6	0.926667	YES
chr4	123179999	123183918	+	KIAA1109	0	3	1	0	3	3	4	6	0	YES
chr16	84158334	84163152	-	HSDL1	5	2	1	3	5	2	8	10	0.49	YES
chr2	48060210	48061717	-	FBXO11	2	2	1	2	5	0	5	7	0	YES
chr11	66613034	66613330	+	RCE1	0	2	1	0	5	0	3	5	-3.66333	YES
chr11	73627706	73629994	+	PAAF1	0	2	1	5	0	0	3	5	0	YES
chr12	56551520	56551665	+	MYL6B	0	2	1	4	1	0	3	5	-7.43	YES
chr15	69692455	69695919	+	PAQR5	0	2	1	1	4	0	3	5	-9.19667	YES
chr3	169985789	169988208	+	PRKCI	0	2	1	3	2	0	3	5	0	YES
chr7	86526949	86536985	-	KIAA1324L	5	1	1	3	6	0	7	9	0	YES
chr3	179304421	179305717	+	ACTL6A	3	1	1	2	5	0	5	7	0.04	YES
chr5	137655064	137661503	-	CDC25C	3	1	1	1	5	1	5	7	2.86667	YES
chr1	10428597	10431198	+	KIF1B	2	1	1	5	1	0	4	6	-0.83	YES
chr14	32315798	32319324	+	NUBPL	2	1	1	1	5	0	4	6	0	YES
chr14	50280769	50281471	-	SDCCAG1	2	1	1	3	1	2	4	6	0	YES
chr3	20156481	20161089	+	KAT2B	2	1	1	4	2	0	4	6	1.45	YES
chr5	130515861	130517921	+	LYRM7	2	1	1	1	5	0	4	6	-0.173333	YES
chr6	154732277	154735432	-	CNKSR3	2	1	1	0	6	0	4	6	0	YES
chr13	99575626	99578090	-	DOCK9	1	1	1	0	4	1	3	5	0	YES
chr15	89422501	89424587	-	HAPLN3	1	1	1	1	3	1	3	5	-1.62667	YES
chr2	15696944	15698703	-	NBAS	1	1	1	1	0	4	3	5	0	YES
chr2	179214117	179226408	+	OSBPL6	1	1	1	0	5	0	3	5	0	YES
chr3	33416911	33418764	+	FBXL2	1	1	1	5	0	0	3	5	1.09	YES
chr7	25194812	25198119	-	C7orf31	1	1	1	3	2	0	3	5	0	YES
chr1	202409917	202411574	+	PPP1R12B	0	1	1	2	1	1	2	4	2.08333	YES
chr10	76737196	76738981	+	MYST4	0	1	1	2	2	0	2	4	0	YES
chr11	62400574	62400655	-	GANAB	0	1	1	0	3	1	2	4	-0.05	YES
chr12	15822760	15823789	-	EPS8	0	1	1	2	2	0	2	4	0	YES
chr12	26816780	26818842	-	ITPR2	0	1	1	2	2	0	2	4	0	YES
chr19	8959707	8961951	-	MUC16	0	1	1	0	4	0	2	4	0.94	YES
chr19	49850621	49851959	-	TEAD2	0	1	1	0	1	3	2	4	0.24	YES
chr2	160136457	160139182	-	WDSUB1	0	1	1	0	0	4	2	4	0.0733333	YES
chr2	173429416	173429705	+	PDK1	0	1	1	0	4	0	2	4	0.513333	YES
chr3	169797686	169801692	+	GPR160	0	1	1	0	4	0	2	4	-0.906667	YES
chr3	185245374	185251358	-	LIPH	0	1	1	2	2	0	2	4	0	YES
chr1	62330306	62340914	+	INADL	5	0	1	1	5	2	6	8	0.423333	YES
chr10	128904566	128908511	+	DOCK1	5	0	1	4	4	0	6	8	0	YES
chr11	130780033	130780164	-	SNX19	5	0	1	2	6	0	6	8	0.57	YES
chr21	26969727	26972110	-	MRPL39	5	0	1	0	7	1	6	8	0	YES
chr9	100245634	100249453	+	TDRD7	5	0	1	2	5	1	6	8	-0.366667	YES
chr3	25674286	25675331	-	TOP2B	4	0	1	5	2	0	5	7	0.0866667	YES
chr17	78311798	78313000	+	RNF213	3	0	1	5	1	0	4	6	0	YES
chr5	73992932	74001043	+	HEXB	3	0	1	1	4	1	4	6	-0.17	YES
chr8	141297834	141301091	-	TRAPPC9	3	0	1	5	1	0	4	6	0	YES
chr1	27589727	27608729	+	WDTC1	2	0	1	1	4	0	3	5	0	YES
chr11	9442053	9442160	+	IPO7	2	0	1	0	2	3	3	5	0.02	YES
chr12	123494625	123497159	-	PITPNM2	2	0	1	0	5	0	3	5	0	YES
chr14	57099890	57101616	+	C14orf101	2	0	1	2	3	0	3	5	0	YES
chr16	78143733	78148872	+	WWOX	2	0	1	0	5	0	3	5	-1.66	YES
chr3	142423429	142430342	+	PLS1	2	0	1	4	1	0	3	5	-0.71	YES
chr3	160253479	160253595	-	KPNA4	2	0	1	2	3	0	3	5	0	YES
chr4	78695871	78697424	-	CNOT6L	2	0	1	0	4	1	3	5	0	YES
chr5	127648488	127653840	-	FBN2	2	0	1	5	0	0	3	5	0.24	YES
chr5	179023683	179025692	+	RUFY1	2	0	1	4	1	0	3	5	0.0366667	YES
chr7	33376235	33380508	+	BBS9	2	0	1	0	2	3	3	5	0	YES
chr7	98582668	98586387	+	TRRAP	2	0	1	4	1	0	3	5	0.116667	YES
chr1	38272888	38273463	-	YRDC	1	0	1	4	0	0	2	4	-0.133333	YES
chr10	29747519	29751205	-	SVIL	1	0	1	0	2	2	2	4	-6.75	YES
chr10	104621938	104622629	+	C10orf32	1	0	1	0	4	0	2	4	-0.23	YES
chr12	41302296	41303874	+	CNTN1	1	0	1	0	4	0	2	4	0	YES
chr12	109927810	109928849	+	UBE3B	1	0	1	2	1	1	2	4	-0.773333	YES
chr13	24330758	24334234	-	MIPEP	1	0	1	1	3	0	2	4	0.746667	YES
chr13	25033449	25034109	-	PARP4	1	0	1	0	4	0	2	4	0	YES
chr15	43347098	43348541	-	UBR1	1	0	1	0	2	2	2	4	0	YES
chr15	90454052	90455975	-	C15orf38	1	0	1	2	2	0	2	4	-1.22333	YES
chr16	3789726	3790399	-	CREBBP	1	0	1	4	0	0	2	4	-0.533333	YES
chr16	50811853	50813575	+	CYLD	1	0	1	0	1	3	2	4	0.78	YES
chr17	41888284	41888479	-	MPP3	1	0	1	3	1	0	2	4	-0.833333	YES
chr2	54858749	54859702	+	SPTBN1	1	0	1	0	4	0	2	4	0	YES
chr2	61324988	61330987	+	KIAA1841	1	0	1	4	0	0	2	4	0.74	YES
chr2	220043356	220043643	+	FAM134A	1	0	1	3	1	0	2	4	0.413333	YES
chr3	108324286	108326935	+	DZIP3	1	0	1	2	2	0	2	4	0	YES
chr3	195250585	195251616	-	PPP1R2	1	0	1	1	3	0	2	4	-0.08	YES
chr4	119612768	119613135	+	METTL14	1	0	1	0	3	1	2	4	0	YES
chr5	1035019	1035503	+	NKD2	1	0	1	3	1	0	2	4	-0.2	YES
chr5	176884505	176884655	-	DBN1	1	0	1	0	4	0	2	4	-0.03	YES
chr7	130040663	130041721	-	TSGA14	1	0	1	0	2	2	2	4	1.13333	YES
chr9	100405643	100407398	+	NCBP1	1	0	1	2	2	0	2	4	0	YES
chr1	46659598	46659945	-	POMGNT1	0	0	1	3	0	0	1	3	-0.233333	YES
chr1	57158176	57159437	+	PRKAA2	0	0	1	0	3	0	1	3	0	YES
chr1	113231761	113232036	+	MOV10	0	0	1	2	1	0	1	3	-0.0966667	YES
chr1	145460264	145470321	-	POLR3GL	0	0	1	2	0	1	1	3	0	YES
chr1	173807398	173808504	+	DARS2	0	0	1	1	0	2	1	3	-0.113333	YES
chr1	229634054	229635430	-	NUP133	0	0	1	0	3	0	1	3	0	YES
chr10	134040473	134041480	-	STK32C	0	0	1	3	0	0	1	3	0	YES
chr11	36248981	36250709	+	LDLRAD3	0	0	1	1	2	0	1	3	-0.0933333	YES
chr11	62560174	62561729	-	NXF1	0	0	1	3	0	0	1	3	-0.343333	YES
chr11	118502771	118502875	+	PHLDB1	0	0	1	3	0	0	1	3	0.496667	YES
chr12	21014073	21015345	+	SLCO1B3	0	0	1	2	1	0	1	3	0	YES
chr12	48457625	48458847	-	SENP1	0	0	1	2	1	0	1	3	0	YES
chr12	48737511	48738381	-	ZNF641	0	0	1	1	1	1	1	3	1.28667	YES
chr12	62918420	62918863	+	MON2	0	0	1	0	1	2	1	3	0	YES
chr12	132393517	132393680	+	ULK1	0	0	1	0	3	0	1	3	0.423333	YES
chr13	20978881	20987420	-	CRYL1	0	0	1	0	3	0	1	3	-0.813333	YES
chr14	81966007	81969064	-	SEL1L	0	0	1	0	3	0	1	3	0	YES
chr14	96777956	96778425	-	ATG2B	0	0	1	3	0	0	1	3	0	YES
chr15	72152138	72154840	-	MYO9A	0	0	1	3	0	0	1	3	0	YES
chr16	58620653	58621104	-	CNOT1	0	0	1	1	1	1	1	3	0	YES
chr17	36476652	36478008	+	MRPL45	0	0	1	2	0	1	1	3	-0.27	YES
chr17	46939667	46940199	+	CALCOCO2	0	0	1	2	1	0	1	3	-0.166667	YES
chr17	53063628	53068185	+	STXBP4	0	0	1	2	1	0	1	3	0	YES
chr17	61914598	61914800	-	SMARCD2	0	0	1	2	0	1	1	3	-0.406667	YES
chr18	44586026	44589342	+	KATNAL2	0	0	1	3	0	0	1	3	0	YES
chr18	47352994	47361713	-	MYO5B	0	0	1	2	1	0	1	3	0.0433333	YES
chr18	54354206	54358446	+	WDR7	0	0	1	2	1	0	1	3	0	YES
chr18	77455309	77455976	+	CTDP1	0	0	1	0	3	0	1	3	0	YES
chr19	7705696	7705785	+	STXBP2	0	0	1	0	3	0	1	3	1.13333	YES
chr19	16612363	16613875	+	C19orf44	0	0	1	1	2	0	1	3	0	YES
chr2	27664490	27664574	+	NRBP1	0	0	1	0	0	3	1	3	-0.106667	YES
chr2	86677086	86678225	+	KDM3A	0	0	1	0	1	2	1	3	0	YES
chr20	402883	407956	+	RBCK1	0	0	1	0	1	2	1	3	0.49	YES
chr20	62070074	62070950	-	KCNQ2	0	0	1	3	0	0	1	3	0	YES
chr22	41564604	41564724	+	EP300	0	0	1	3	0	0	1	3	-0.133333	YES
chr22	42471657	42473283	+	FAM109B	0	0	1	2	1	0	1	3	-0.766667	YES
chr3	43759350	43759934	+	ABHD5	0	0	1	2	1	0	1	3	-0.0166667	YES
chr3	108361362	108363010	+	DZIP3	0	0	1	2	1	0	1	3	-0.68	YES
chr4	56724614	56726576	+	EXOC1	0	0	1	0	3	0	1	3	-0.26	YES
chr5	76357628	76358876	+	AGGF1	0	0	1	0	1	2	1	3	-0.306667	YES
chr5	95729083	95730567	-	PCSK1	0	0	1	0	3	0	1	3	0	YES
chr5	137750929	137753171	+	KDM3B	0	0	1	0	3	0	1	3	0.00333333	YES
chr5	148699291	148699953	+	AFAP1L1	0	0	1	0	0	3	1	3	0	YES
chr6	49427219	49430815	-	MUT	0	0	1	1	1	1	1	3	0	YES
chr6	105729778	105730325	-	PREP	0	0	1	2	1	0	1	3	0.04	YES
chr6	144095353	144098464	+	PHACTR2	0	0	1	0	3	0	1	3	0	YES
chr6	161529002	161529774	+	MAP3K4	0	0	1	3	0	0	1	3	0	YES
chr8	2855707	2857479	-	CSMD1	0	0	1	3	0	0	1	3	0	YES
chr8	95505047	95507087	-	KIAA1429	0	0	1	1	2	0	1	3	0.563333	YES
chr9	2191409	2192703	+	SMARCA2	0	0	1	3	0	0	1	3	0.263333	YES
chr9	107599849	107602559	-	ABCA1	0	0	1	0	3	0	1	3	0	YES
chr9	131513807	131514951	-	ZER1	0	0	1	3	0	0	1	3	0.663333	YES
chrX	47862053	47862906	-	ZNF182	0	0	1	0	1	2	1	3	1.37	YES
chrX	79951490	79952237	-	BRWD3	0	0	1	2	1	0	1	3	0	YES
chrX	100087899	100088168	+	CSTF2	0	0	1	3	0	0	1	3	0	YES
chr2	141253318	141259255	-	LRP1B	1	5	0	6	2	0	6	8	0	YES
chr10	75302890	75305295	-	USP54	0	4	0	2	3	1	4	6	-0.74	YES
chr4	146697113	146700525	-	ZNF827	1	3	0	2	3	1	4	6	0.74	YES
chr5	178039892	178040473	-	CLK4	1	3	0	5	1	0	4	6	8.07333	YES
chr13	115028490	115030624	+	CDC16	4	2	0	4	4	0	6	8	-0.156667	YES
chr14	35045049	35050766	-	SNX6	3	2	0	3	4	0	5	7	0	YES
chr6	42647571	42650792	+	UBR2	3	2	0	3	1	3	5	7	0.00666667	YES
chr1	201752981	201754437	+	NAV1	1	2	0	2	3	0	3	5	-0.9	YES
chr13	28127577	28130372	-	LNX2	1	2	0	0	4	1	3	5	0	YES
chr14	20819282	20820403	+	PARP2	1	2	0	3	1	1	3	5	-0.0933333	YES
chr1	109337530	109338855	+	STXBP3	0	2	0	4	0	0	2	4	0	YES
chr10	13652186	13653614	+	PRPF18	0	2	0	3	1	0	2	4	0	YES
chr15	91548162	91548284	-	VPS33B	0	2	0	4	0	0	2	4	1.75333	YES
chr17	80382380	80386433	+	HEXDC	0	2	0	1	3	0	2	4	0	YES
chr19	36139306	36142134	+	COX6B1	0	2	0	4	0	0	2	4	0.03	YES
chr5	54570839	54572093	-	DHX29	0	2	0	0	4	0	2	4	0	YES
chr16	11861435	11862170	-	ZC3H7A	5	1	0	3	5	0	6	8	0.0433333	YES
chr1	78194398	78195544	-	USP33	4	1	0	5	2	0	5	7	0	YES
chr12	123014740	123019210	+	KNTC1	4	1	0	1	5	1	5	7	0	YES
chr2	160033030	160035066	+	TANC1	4	1	0	3	3	1	5	7	0	YES
chr3	138400888	138402519	-	PIK3CB	4	1	0	1	6	0	5	7	0	YES
chr16	84793553	84793777	+	USP10	3	1	0	3	3	0	4	6	0.00333333	YES
chr11	73789763	73795925	-	C2CD3	2	1	0	3	2	0	3	5	0	YES
chr17	34106080	34106247	-	MMP28	2	1	0	3	2	0	3	5	-0.636667	YES
chr2	202572715	202574603	-	ALS2	2	1	0	0	3	2	3	5	0.853333	YES
chr3	185344182	185347569	+	SENP2	2	1	0	2	2	1	3	5	0.646667	YES
chr4	40146421	40154399	+	N4BP2	2	1	0	0	3	2	3	5	0	YES
chr1	10384121	10384815	+	KIF1B	1	1	0	1	3	0	2	4	0.336667	YES
chr1	10434524	10434911	+	KIF1B	1	1	0	0	4	0	2	4	-0.0166667	YES
chr1	43240540	43240879	+	C1orf50	1	1	0	0	4	0	2	4	0.316667	YES
chr10	93258908	93260258	+	HECTD2	1	1	0	3	1	0	2	4	-0.9	YES
chr11	111859780	111863138	+	DIXDC1	1	1	0	3	1	0	2	4	0	YES
chr16	50813956	50815156	+	CYLD	1	1	0	2	2	0	2	4	-1.38	YES
chr19	11257966	11258493	-	SPC24	1	1	0	1	3	0	2	4	-8.04667	YES
chr2	139307865	139308052	+	SPOPL	1	1	0	0	1	3	2	4	6.45	YES
chr4	88983157	88986525	+	PKD2	1	1	0	0	4	0	2	4	0	YES
chr5	54922488	54923718	-	SLC38A9	1	1	0	3	0	1	2	4	0.583333	YES
chr5	89701617	89703515	-	CETN3	1	1	0	4	0	0	2	4	0	YES
chr6	110064476	110064877	+	FIG4	1	1	0	1	3	0	2	4	-0.176667	YES
chr10	35321423	35322093	-	CUL2	0	1	0	0	3	0	1	3	0	YES
chr10	102675800	102676326	+	FAM178A	0	1	0	3	0	0	1	3	0	YES
chr12	122611910	122612429	+	MLXIP	0	1	0	3	0	0	1	3	0	YES
chr13	73327960	73329288	+	C13orf34	0	1	0	0	3	0	1	3	3.72	YES
chr14	53004391	53009088	-	TXNDC16	0	1	0	3	0	0	1	3	0	YES
chr16	19474690	19475097	+	TMC5	0	1	0	3	0	0	1	3	1.00667	YES
chr16	28497812	28497898	-	CLN3	0	1	0	0	3	0	1	3	0.183333	YES
chr17	41122360	41123623	-	AARSD1	0	1	0	0	0	3	1	3	-0.96	YES
chr2	202257770	202259520	-	TRAK2	0	1	0	0	2	1	1	3	0	YES
chr2	219143289	219143760	-	TMBIM1	0	1	0	0	3	0	1	3	0.143333	YES
chr2	219206868	219208222	+	PNKD	0	1	0	3	0	0	1	3	-0.79	YES
chr2	227771598	227773537	+	RHBDD1	0	1	0	2	0	1	1	3	0	YES
chr3	44853782	44854566	+	KIF15	0	1	0	3	0	0	1	3	0	YES
chr3	72427789	72428190	-	RYBP	0	1	0	0	3	0	1	3	-0.353333	YES
chr3	141905356	141906545	-	GK5	0	1	0	2	1	0	1	3	0	YES
chr5	133478792	133479282	+	TCF7	0	1	0	0	0	3	1	3	0	YES
chr6	20546755	20548823	+	CDKAL1	0	1	0	0	2	1	1	3	0	YES
chr6	152469514	152470611	-	SYNE1	0	1	0	3	0	0	1	3	0	YES
chr8	11710205	11710837	-	CTSB	0	1	0	0	2	1	1	3	0	YES
chrX	129267431	129270019	-	AIFM1	0	1	0	0	3	0	1	3	0	YES
chr8	37623265	37623797	+	PROSC	5	0	0	1	5	1	5	7	-0.36	YES
chr11	120348015	120348155	+	ARHGEF12	3	0	0	0	5	0	3	5	0	YES
chr12	110890902	110891547	-	GPN3	3	0	0	3	2	0	3	5	0.0166667	YES
chr14	50249313	50249547	+	KLHDC2	3	0	0	0	5	0	3	5	-2.80333	YES
chr19	18576386	18576606	-	ELL	3	0	0	1	4	0	3	5	0.923333	YES
chr3	10116358	10119764	+	FANCD2	3	0	0	3	2	0	3	5	0	YES
chr4	139100549	139101794	-	SLC7A11	3	0	0	0	3	2	3	5	0.783333	YES
chr4	154523880	154524454	+	KIAA0922	3	0	0	1	2	2	3	5	0	YES
chr1	169842894	169845118	-	SCYL3	2	0	0	1	3	0	2	4	0	YES
chr10	51582273	51582795	+	NCOA4	2	0	0	3	0	1	2	4	0.12	YES
chr10	91005551	91007294	-	LIPA	2	0	0	4	0	0	2	4	-0.0466667	YES
chr10	129231693	129237290	+	DOCK1	2	0	0	3	1	0	2	4	0	YES
chr11	121478000	121478812	+	SORL1	2	0	0	1	3	0	2	4	-0.606667	YES
chr13	96505912	96506568	-	UGGT2	2	0	0	0	4	0	2	4	0.05	YES
chr15	44119291	44120162	+	WDR76	2	0	0	4	0	0	2	4	-0.696667	YES
chr17	75189632	75190758	+	SEC14L1	2	0	0	0	3	1	2	4	0	YES
chr20	47309329	47317290	-	PREX1	2	0	0	3	1	0	2	4	0.483333	YES
chr20	48456137	48461572	+	SLC9A8	2	0	0	2	1	1	2	4	0	YES
chr21	44427729	44430162	+	PKNOX1	2	0	0	0	3	1	2	4	0	YES
chr3	49867200	49867452	-	TRAIP	2	0	0	0	2	2	2	4	-0.0133333	YES
chr5	150507801	150508967	-	ANXA6	2	0	0	4	0	0	2	4	0	YES
chr7	25191304	25194629	-	C7orf31	2	0	0	2	2	0	2	4	0	YES
chr7	138864390	138865837	+	TTC26	2	0	0	1	3	0	2	4	0.336667	YES
chr8	20067043	20067856	+	ATP6V1B2	2	0	0	1	3	0	2	4	0	YES
chrX	18936973	18938149	-	PHKA2	2	0	0	1	3	0	2	4	0	YES
chrX	119679373	119680401	-	CUL4B	2	0	0	1	2	1	2	4	0	YES
chr1	23233451	23234445	+	EPHB2	1	0	0	0	3	0	1	3	1.22333	YES
chr1	36359773	36359915	+	EIF2C1	1	0	0	0	3	0	1	3	0	YES
chr1	155792268	155796627	-	GON4L	1	0	0	3	0	0	1	3	0	YES
chr10	135113108	135113488	-	TUBGCP2	1	0	0	3	0	0	1	3	0	YES
chr11	13393957	13395641	+	ARNTL	1	0	0	3	0	0	1	3	0.513333	YES
chr11	73825639	73829272	-	C2CD3	1	0	0	0	0	3	1	3	-0.546667	YES
chr11	134038091	134038363	-	NCAPD3	1	0	0	3	0	0	1	3	0	YES
chr12	88448191	88449352	-	CEP290	1	0	0	1	1	1	1	3	-0.91	YES
chr12	105540305	105540819	+	KIAA1033	1	0	0	1	1	1	1	3	0	YES
chr12	109613846	109613957	+	ACACB	1	0	0	3	0	0	1	3	0	YES
chr12	123089635	123089852	+	KNTC1	1	0	0	0	3	0	1	3	0	YES
chr14	52899306	52905921	-	TXNDC16	1	0	0	0	3	0	1	3	0.88	YES
chr14	68114901	68117431	+	ARG2	1	0	0	1	0	2	1	3	9.70667	YES
chr14	78201356	78202279	-	SNW1	1	0	0	0	3	0	1	3	0	YES
chr14	81970651	81972417	-	SEL1L	1	0	0	0	1	2	1	3	-0.206667	YES
chr15	74743862	74744636	-	UBL7	1	0	0	2	1	0	1	3	0.22	YES
chr16	19051769	19056205	+	TMC7	1	0	0	0	3	0	1	3	0	YES
chr16	29993076	29993179	+	TAOK2	1	0	0	3	0	0	1	3	-0.2	YES
chr16	70389439	70390014	+	DDX19A	1	0	0	0	2	1	1	3	0.29	YES
chr18	28666706	28667631	-	DSC2	1	0	0	0	3	0	1	3	0	YES
chr2	27715346	27715532	-	FNDC4	1	0	0	0	3	0	1	3	-2.13333	YES
chr2	120718530	120720191	+	PTPN4	1	0	0	0	3	0	1	3	0	YES
chr2	170417296	170419734	-	FASTKD1	1	0	0	0	3	0	1	3	0	YES
chr21	15750734	15753523	-	HSPA13	1	0	0	0	1	2	1	3	-0.0833333	YES
chr22	32788347	32789878	-	C22orf28	1	0	0	2	1	0	1	3	0	YES
chr22	46760149	46760408	-	CELSR1	1	0	0	0	3	0	1	3	-0.653333	YES
chr22	51008098	51008721	-	CPT1B	1	0	0	1	2	0	1	3	0.456667	YES
chr3	5248959	5249777	+	EDEM1	1	0	0	2	0	1	1	3	0	YES
chr3	33725949	33728551	-	CLASP2	1	0	0	2	1	0	1	3	0	YES
chr3	45867825	45868847	-	LZTFL1	1	0	0	0	3	0	1	3	-1.22333	YES
chr3	141299294	141299941	+	RASA2	1	0	0	1	2	0	1	3	0	YES
chr3	184911276	184922203	-	EHHADH	1	0	0	1	2	0	1	3	-0.513333	YES
chr4	3425369	3427190	+	RGS12	1	0	0	0	3	0	1	3	-0.3	YES
chr4	8616226	8620155	+	CPZ	1	0	0	0	3	0	1	3	-2.70667	YES
chr4	13608814	13610153	-	BOD1L	1	0	0	2	1	0	1	3	-0.143333	YES
chr4	37841554	37841687	+	PGM2	1	0	0	0	3	0	1	3	0	YES
chr4	39280284	39287106	+	WDR19	1	0	0	2	1	0	1	3	0.77	YES
chr4	56830569	56831809	+	CEP135	1	0	0	0	1	2	1	3	0.0733333	YES
chr4	77097064	77097589	-	SCARB2	1	0	0	2	0	1	1	3	0	YES
chr4	110615857	110617565	-	CASP6	1	0	0	2	1	0	1	3	0.133333	YES
chr5	54555773	54557195	-	DHX29	1	0	0	3	0	0	1	3	-0.27	YES
chr5	70757754	70759884	+	BDP1	1	0	0	1	2	0	1	3	0.653333	YES
chr6	8421062	8422702	-	SLC35B3	1	0	0	2	1	0	1	3	0.196667	YES
chr6	70423690	70428847	-	LMBRD1	1	0	0	0	3	0	1	3	0.253333	YES
chr7	101183331	101187278	+	EMID2	1	0	0	0	3	0	1	3	0	YES
chr7	129095213	129096279	+	FAM40B	1	0	0	0	3	0	1	3	0	YES
chr9	17340947	17342322	+	CNTLN	1	0	0	0	3	0	1	3	0	YES
chr9	35236584	35237699	+	UNC13B	1	0	0	0	2	1	1	3	0	YES
chr9	93978389	93979558	-	AUH	1	0	0	0	3	0	1	3	0.773333	YES
chr9	107645439	107646707	-	ABCA1	1	0	0	0	3	0	1	3	0	YES
chr9	130245300	130248014	+	LRSAM1	1	0	0	2	1	0	1	3	0.713333	YES
chr9	132719744	132720769	-	FNBP1	1	0	0	3	0	0	1	3	0.13	YES
chr9	137701137	137702100	+	COL5A1	1	0	0	2	1	0	1	3	0	YES
chrX	129279545	129281467	-	AIFM1	1	0	0	0	2	1	1	3	-0.0566667	YES
chrX	149900092	149901013	+	MTMR1	1	0	0	0	1	2	1	3	0	YES
chr1	12304494	12304593	+	VPS13D	0	0	0	2	0	0	0	2	0	YES
chr1	19430752	19431078	-	UBR4	0	0	0	0	2	0	0	2	0	YES
chr1	19523760	19524163	-	UBR4	0	0	0	0	2	0	0	2	0	YES
chr1	27620608	27621004	+	WDTC1	0	0	0	0	2	0	0	2	0	YES
chr1	29605634	29605967	+	PTPRU	0	0	0	2	0	0	0	2	0	YES
chr1	40733545	40734090	+	ZMPSTE24	0	0	0	0	2	0	0	2	0.0466667	YES
chr1	45516926	45524280	-	ZSWIM5	0	0	0	0	2	0	0	2	0	YES
chr1	52250000	52250113	+	OSBPL9	0	0	0	0	2	0	0	2	-0.493333	YES
chr1	147126442	147127275	-	ACP6	0	0	0	2	0	0	0	2	0	YES
chr1	151732658	151733291	-	MRPL9	0	0	0	0	2	0	0	2	0.223333	YES
chr1	202861788	202862366	-	KLHL12	0	0	0	0	2	0	0	2	0.0133333	YES
chr1	204101385	204103642	-	ETNK2	0	0	0	0	0	2	0	2	-0.126667	YES
chr1	208270229	208272190	-	PLXNA2	0	0	0	0	2	0	0	2	0	YES
chr1	235419066	235420474	-	ARID4B	0	0	0	1	0	1	0	2	0	YES
chr1	242011656	242012032	+	EXO1	0	0	0	2	0	0	0	2	-0.173333	YES
chr10	52220575	52226649	-	SGMS1	0	0	0	0	2	0	0	2	0	YES
chr10	74908163	74912050	-	ECD	0	0	0	2	0	0	0	2	1.14	YES
chr10	92662102	92662948	+	RPP30	0	0	0	0	2	0	0	2	3.96667	YES
chr10	95353793	95360149	-	RBP4	0	0	0	2	0	0	0	2	0	YES
chr10	105138308	105139364	+	TAF5	0	0	0	2	0	0	0	2	0	YES
chr10	112342401	112343141	+	SMC3	0	0	0	0	2	0	0	2	0.27	YES
chr11	13407339	13408142	+	ARNTL	0	0	0	0	2	0	0	2	3.33667	YES
chr11	31815663	31816177	-	PAX6	0	0	0	0	2	0	0	2	0.6	YES
chr11	62393920	62394042	-	GANAB	0	0	0	0	2	0	0	2	-0.0466667	YES
chr11	63998413	63999342	+	DNAJC4	0	0	0	0	2	0	0	2	-1.46333	YES
chr11	64602050	64602320	-	CDC42BPG	0	0	0	0	2	0	0	2	0	YES
chr11	67166117	67166192	-	PPP1CA	0	0	0	1	0	1	0	2	-0.26	YES
chr11	122669743	122671895	+	UBASH3B	0	0	0	0	2	0	0	2	0	YES
chr11	124750505	124751134	+	ROBO3	0	0	0	0	2	0	0	2	1.03	YES
chr12	3120235	3121335	+	TEAD4	0	0	0	0	1	1	0	2	0.19	YES
chr12	9254271	9256834	-	A2M	0	0	0	1	1	0	0	2	0	YES
chr12	19514641	19518897	+	PLEKHA5	0	0	0	0	2	0	0	2	0	YES
chr12	26592253	26596475	-	ITPR2	0	0	0	0	1	1	0	2	0	YES
chr12	28603187	28603282	+	CCDC91	0	0	0	0	2	0	0	2	0	YES
chr12	44167833	44171432	+	IRAK4	0	0	0	1	1	0	0	2	0	YES
chr12	72025668	72025751	-	ZFC3H1	0	0	0	0	2	0	0	2	-0.183333	YES
chr12	95478423	95479555	-	FGD6	0	0	0	1	0	1	0	2	4.29667	YES
chr12	102160073	102161814	-	GNPTAB	0	0	0	2	0	0	0	2	-0.186667	YES
chr12	109660426	109660603	+	ACACB	0	0	0	1	1	0	0	2	-0.74	YES
chr12	124228483	124228747	+	ATP6V0A2	0	0	0	1	1	0	0	2	0	YES
chr13	32936831	32937315	+	BRCA2	0	0	0	0	2	0	0	2	0	YES
chr13	53010540	53013232	-	VPS36	0	0	0	0	2	0	0	2	0	YES
chr14	20915680	20915773	-	OSGEP	0	0	0	0	2	0	0	2	-0.693333	YES
chr14	24683806	24684757	-	MDP1	0	0	0	0	2	0	0	2	0.0766667	YES
chr14	31535541	31539048	+	AP4S1	0	0	0	0	2	0	0	2	0	YES
chr14	50942889	50942976	-	MAP4K5	0	0	0	0	2	0	0	2	0	YES
chr14	58897436	58899105	+	KIAA0586	0	0	0	0	2	0	0	2	0	YES
chr14	81950742	81952015	-	SEL1L	0	0	0	0	0	2	0	2	0.503333	YES
chr15	39879722	39880242	+	THBS1	0	0	0	0	2	0	0	2	0.623333	YES
chr15	42479562	42479955	-	VPS39	0	0	0	0	0	2	0	2	0	YES
chr15	42510577	42511778	-	TMEM87A	0	0	0	0	2	0	0	2	0.13	YES
chr15	45951356	45954152	+	SQRDL	0	0	0	0	1	1	0	2	-0.29	YES
chr15	48762954	48764747	-	FBN1	0	0	0	0	2	0	0	2	0	YES
chr15	48764874	48766451	-	FBN1	0	0	0	0	2	0	0	2	-0.496667	YES
chr15	55633022	55633935	+	PIGB	0	0	0	0	2	0	0	2	-1.99667	YES
chr15	63092969	63097798	+	TLN2	0	0	0	0	2	0	0	2	0	YES
chr15	63916090	63916356	-	HERC1	0	0	0	0	0	2	0	2	0.573333	YES
chr15	72313359	72320071	-	MYO9A	0	0	0	2	0	0	0	2	0	YES
chr15	73593799	73594953	+	NEO1	0	0	0	0	2	0	0	2	0	YES
chr15	78398277	78401576	-	CIB2	0	0	0	0	1	1	0	2	0	YES
chr16	4409623	4410278	-	CORO7	0	0	0	2	0	0	0	2	-0.67	YES
chr16	4937229	4938102	-	PPL	0	0	0	2	0	0	0	2	-0.01	YES
chr16	15661914	15675073	+	C16orf45	0	0	0	2	0	0	0	2	0	YES
chr16	19637546	19639015	+	C16orf62	0	0	0	0	0	2	0	2	0	YES
chr16	25258712	25263229	-	ZKSCAN2	0	0	0	0	2	0	0	2	0	YES
chr16	25264359	25266526	-	ZKSCAN2	0	0	0	1	1	0	0	2	0	YES
chr16	53498276	53499349	+	RBL2	0	0	0	0	2	0	0	2	-0.386667	YES
chr16	53706929	53708928	-	RPGRIP1L	0	0	0	0	2	0	0	2	0	YES
chr16	57546783	57549252	-	CCDC102A	0	0	0	2	0	0	0	2	0	YES
chr16	74921654	74922066	-	WDR59	0	0	0	0	2	0	0	2	-0.206667	YES
chr16	83994366	83994585	+	OSGIN1	0	0	0	0	2	0	0	2	0	YES
chr17	8131638	8131820	-	C17orf68	0	0	0	0	0	2	0	2	0	YES
chr17	27414140	27416978	-	MYO18A	0	0	0	0	2	0	0	2	0.0833333	YES
chr17	27896105	27896335	+	TP53I13	0	0	0	0	2	0	0	2	-0.17	YES
chr17	42433443	42433540	-	FAM171A2	0	0	0	0	2	0	0	2	-0.36	YES
chr17	73501733	73501901	-	CASKIN2	0	0	0	2	0	0	0	2	0	YES
chr17	73627091	73627229	-	RECQL5	0	0	0	0	2	0	0	2	2.09667	YES
chr17	78092157	78092451	+	GAA	0	0	0	0	2	0	0	2	0.503333	YES
chr17	79418897	79418996	+	BAHCC1	0	0	0	2	0	0	0	2	0	YES
chr18	10696287	10696389	-	FAM38B	0	0	0	0	2	0	0	2	0	YES
chr18	43704860	43705709	+	HAUS1	0	0	0	0	2	0	0	2	0.13	YES
chr18	59751840	59752441	-	PIGN	0	0	0	0	2	0	0	2	0	YES
chr18	59888508	59888616	+	KIAA1468	0	0	0	0	2	0	0	2	0	YES
chr19	1918283	1918887	+	SCAMP4	0	0	0	2	0	0	0	2	0.67	YES
chr19	9968159	9968390	-	OLFM2	0	0	0	0	2	0	0	2	0	YES
chr19	12874246	12874341	-	HOOK2	0	0	0	0	2	0	0	2	0	YES
chr19	16503252	16504761	-	EPS15L1	0	0	0	0	2	0	0	2	-0.326667	YES
chr19	33422478	33424356	-	CCDC123	0	0	0	0	1	1	0	2	0	YES
chr19	39907641	39908194	+	PLEKHG2	0	0	0	0	0	2	0	2	-0.583333	YES
chr19	42462536	42462887	-	RABAC1	0	0	0	0	0	2	0	2	-0.25	YES
chr19	42860158	42860234	+	MEGF8	0	0	0	0	2	0	0	2	0.02	YES
chr19	44159726	44160630	-	PLAUR	0	0	0	2	0	0	0	2	-0.35	YES
chr19	46274924	46275028	-	DMPK	0	0	0	0	0	2	0	2	3.30667	YES
chr19	47549944	47551664	-	TMEM160	0	0	0	0	2	0	0	2	-0.676667	YES
chr19	48976636	48977161	+	CYTH2	0	0	0	0	2	0	0	2	-0.146667	YES
chr2	33525641	33526588	+	LTBP1	0	0	0	0	1	1	0	2	0	YES
chr2	38202458	38208425	+	FAM82A1	0	0	0	0	0	2	0	2	0	YES
chr2	183622553	183623563	+	DNAJC10	0	0	0	2	0	0	0	2	0	YES
chr2	201887656	201888681	-	FAM126B	0	0	0	0	0	2	0	2	0	YES
chr2	203378553	203379610	+	BMPR2	0	0	0	0	2	0	0	2	0	YES
chr2	205989191	205990332	+	PARD3B	0	0	0	2	0	0	0	2	0	YES
chr2	220505685	220506372	+	SLC4A3	0	0	0	2	0	0	0	2	-0.656667	YES
chr20	2840454	2840699	+	VPS16	0	0	0	2	0	0	0	2	-0.3	YES
chr20	4840031	4842593	-	SLC23A2	0	0	0	0	2	0	0	2	0	YES
chr20	47614771	47614872	+	ARFGEF2	0	0	0	1	1	0	0	2	-0.126667	YES
chr21	15748141	15750519	-	HSPA13	0	0	0	0	1	1	0	2	0.243333	YES
chr21	34950751	34951655	-	DONSON	0	0	0	2	0	0	0	2	0.08	YES
chr21	47700052	47700410	-	MCM3AP	0	0	0	1	1	0	0	2	0	YES
chr22	30803593	30805175	+	SEC14L2	0	0	0	0	2	0	0	2	2.02	YES
chr22	43537256	43538931	-	MCAT	0	0	0	0	0	2	0	2	0.133333	YES
chr3	9974543	9974636	+	IL17RC	0	0	0	1	1	0	0	2	-16.7633	YES
chr3	9976297	9976518	+	CRELD1	0	0	0	1	1	0	0	2	-0.173333	YES
chr3	20178545	20181712	+	KAT2B	0	0	0	2	0	0	0	2	0	YES
chr3	44437990	44438234	+	C3orf23	0	0	0	0	2	0	0	2	-0.393333	YES
chr3	44869021	44869705	+	KIF15	0	0	0	0	2	0	0	2	0	YES
chr3	45996886	45999899	-	FYCO1	0	0	0	1	1	0	0	2	0	YES
chr3	48608402	48608533	-	COL7A1	0	0	0	0	1	1	0	2	-0.32	YES
chr3	51464993	51466712	-	VPRBP	0	0	0	0	0	2	0	2	0	YES
chr3	52012099	52012274	+	ABHD14A	0	0	0	0	2	0	0	2	-0.443333	YES
chr3	52436691	52436794	-	BAP1	0	0	0	0	0	2	0	2	-0.273333	YES
chr3	108391504	108392924	+	DZIP3	0	0	0	2	0	0	0	2	-0.926667	YES
chr3	122284918	122287335	+	DTX3L	0	0	0	0	2	0	0	2	-0.116667	YES
chr3	123426851	123427544	-	MYLK	0	0	0	2	0	0	0	2	1.99	YES
chr3	129195645	129196858	+	IFT122	0	0	0	0	1	1	0	2	0	YES
chr3	178948165	178951881	+	PIK3CA	0	0	0	1	1	0	0	2	-0.356667	YES
chr3	196096383	196098766	-	UBXN7	0	0	0	1	1	0	0	2	0	YES
chr4	15571013	15572020	+	CC2D2A	0	0	0	0	2	0	0	2	0.286667	YES
chr4	15938276	15939873	-	FGFBP1	0	0	0	0	2	0	0	2	0.77	YES
chr4	39257581	39259105	+	WDR19	0	0	0	1	0	1	0	2	0	YES
chr4	44682570	44682710	+	GUF1	0	0	0	2	0	0	0	2	0.66	YES
chr4	47537633	47537918	+	ATP10D	0	0	0	2	0	0	0	2	0	YES
chr4	87694112	87695525	+	PTPN13	0	0	0	2	0	0	0	2	0	YES
chr4	89397182	89400503	+	HERC5	0	0	0	0	2	0	0	2	0.833333	YES
chr4	174238884	174239581	+	GALNT7	0	0	0	2	0	0	0	2	0	YES
chr4	175158751	175160144	-	FBXO8	0	0	0	0	0	2	0	2	-0.46	YES
chr5	16763865	16764358	-	MYO10	0	0	0	2	0	0	0	2	0	YES
chr5	43649411	43650578	+	NNT	0	0	0	0	2	0	0	2	0	YES
chr5	131553542	131554237	-	P4HA2	0	0	0	0	2	0	0	2	0	YES
chr6	25963511	25966562	+	TRIM38	0	0	0	0	2	0	0	2	0.456667	YES
chr6	27220729	27222471	+	PRSS16	0	0	0	0	2	0	0	2	-0.9	YES
chr6	35253986	35254098	+	ZNF76	0	0	0	0	2	0	0	2	-0.19	YES
chr6	43193882	43194064	-	C6orf108	0	0	0	0	2	0	0	2	-0.46	YES
chr6	151198821	151198908	+	MTHFD1L	0	0	0	0	2	0	0	2	0.0366667	YES
chr6	158569987	158571484	-	SERAC1	0	0	0	0	2	0	0	2	-0.666667	YES
chr6	160198489	160199201	+	ACAT2	0	0	0	2	0	0	0	2	-0.0333333	YES
chr7	8178678	8181394	-	ICA1	0	0	0	2	0	0	0	2	0	YES
chr7	16841428	16844558	-	AGR2	0	0	0	0	2	0	0	2	-0.796667	YES
chr7	38768187	38768291	-	VPS41	0	0	0	1	1	0	0	2	0	YES
chr7	81642827	81643716	-	CACNA2D1	0	0	0	2	0	0	0	2	-0.323333	YES
chr7	91706322	91707009	+	AKAP9	0	0	0	0	2	0	0	2	0	YES
chr7	98546309	98547039	+	TRRAP	0	0	0	0	2	0	0	2	0	YES
chr7	99754173	99754256	-	C7orf43	0	0	0	2	0	0	0	2	-3.12	YES
chr7	148947640	148947771	+	ZNF212	0	0	0	0	0	2	0	2	-0.28	YES
chr7	149419645	149419873	+	KRBA1	0	0	0	2	0	0	0	2	0.156667	YES
chr8	26484195	26484730	+	DPYSL2	0	0	0	0	1	1	0	2	0	YES
chr8	30539579	30541604	-	GSR	0	0	0	0	2	0	0	2	-0.0433333	YES
chr8	37732841	37734626	-	RAB11FIP1	0	0	0	0	0	2	0	2	0	YES
chr8	91055029	91057076	+	DECR1	0	0	0	0	2	0	0	2	0	YES
chr8	100833711	100836059	+	VPS13B	0	0	0	0	2	0	0	2	0	YES
chr8	144403557	144406168	-	TOP1MT	0	0	0	0	2	0	0	2	-0.0333333	YES
chr9	13175875	13176134	-	MPDZ	0	0	0	0	2	0	0	2	0	YES
chr9	34552328	34552671	-	CNTFR	0	0	0	0	2	0	0	2	0	YES
chr9	34637418	34637543	-	SIGMAR1	0	0	0	0	2	0	0	2	-1.05333	YES
chr9	35381717	35382353	+	UNC13B	0	0	0	0	0	2	0	2	0	YES
chr9	79985852	79985941	+	VPS13A	0	0	0	2	0	0	0	2	0	YES
chr9	80855112	80855207	+	CEP78	0	0	0	2	0	0	0	2	0	YES
chr9	96323533	96324489	+	FAM120A	0	0	0	0	2	0	0	2	0.0633333	YES
chr9	99284886	99285542	-	CDC14B	0	0	0	0	2	0	0	2	0	YES
chr9	106862485	106862669	+	SMC2	0	0	0	2	0	0	0	2	0	YES
chr9	107550336	107550706	-	ABCA1	0	0	0	0	1	1	0	2	1.66333	YES
chr9	111705325	111705982	-	CTNNAL1	0	0	0	1	1	0	0	2	0	YES
chr9	115969577	115973756	-	FKBP15	0	0	0	2	0	0	0	2	0	YES
chr9	116358046	116359047	+	RGS3	0	0	0	2	0	0	0	2	0	YES
chr9	131502399	131503050	-	ZER1	0	0	0	0	0	2	0	2	0.44	YES
chr9	132623313	132623821	+	USP20	0	0	0	0	2	0	0	2	-0.423333	YES
chr9	139701320	139701421	+	KIAA1984	0	0	0	0	0	2	0	2	0	YES
chrX	2861241	2864038	-	ARSE	0	0	0	0	2	0	0	2	0	YES
chrX	48385414	48385542	+	EBP	0	0	0	0	2	0	0	2	0.11	YES
chrX	70460959	70461076	-	ZMYM3	0	0	0	2	0	0	0	2	-1.08	YES
chrX	99888537	99888927	-	TSPAN6	0	0	0	0	2	0	0	2	-0.0533333	YES
chrX	108924366	108924494	-	ACSL4	0	0	0	0	2	0	0	2	0	YES
chrX	123185070	123185164	+	STAG2	0	0	0	2	0	0	0	2	0	YES
chrX	135104857	135106488	+	SLC9A6	0	0	0	2	0	0	0	2	0	YES
chr3	139102278	139108310	-	COPB2	9	6	22	6	20	12	37	38	8.14667	YES
chr7	56032395	56045818	+	GBAS	9	1	14	8	14	3	24	25	-0.49	YES
chr8	48962539	48973241	+	UBE2V2	7	8	12	4	20	4	27	28	0.0766667	YES
chr11	2610085	2683190	+	KCNQ1	1	1	12	5	10	0	14	15	0	YES
chr11	57450016	57455979	+	ZDHHC5	5	2	9	12	2	3	16	17	0	YES
chr20	2928671	2944917	+	PTPRA	5	1	9	7	8	1	15	16	0.47	YES
chr9	79003573	79007333	-	RFK	4	1	9	0	15	0	14	15	0.00666667	YES
chr1	27561443	27587446	+	WDTC1	8	0	9	7	9	2	17	18	0	YES
chr2	182760807	182761634	+	SSFA2	1	0	9	0	11	0	10	11	-0.01	YES
chr14	31112612	31118733	+	SCFD1	2	3	8	6	8	0	13	14	0	YES
chr9	100449544	100451815	-	XPA	4	4	7	9	6	1	15	16	-0.45	YES
chr21	33060778	33063109	-	SFRS15	1	3	7	4	8	0	11	12	0	YES
chr9	36339812	36342321	-	RNF38	1	2	7	0	6	5	10	11	0.0766667	YES
chr7	48139385	48141420	+	UPP1	0	1	7	2	5	2	8	9	-0.6	YES
chr2	234371106	234371288	+	DGKD	1	0	7	1	7	1	8	9	-0.12	YES
chrX	108908724	108911329	-	ACSL4	1	0	7	4	3	2	8	9	0	YES
chr7	94791284	94827660	+	PPP1R9A	6	7	6	8	12	0	19	20	0	YES
chr2	48030825	48032048	+	MSH6	4	6	6	4	7	6	16	17	-1.35667	YES
chr4	110435013	110437683	+	SEC24B	3	5	6	2	13	0	14	15	0.153333	YES
chr6	13625997	13632601	-	RANBP9	9	3	6	5	14	0	18	19	-0.02	YES
chr1	94948796	94953097	+	ABCD3	1	3	6	2	6	3	10	11	0	YES
chr17	78282972	78286811	+	RNF213	0	3	6	8	2	0	9	10	0	YES
chr18	54318808	54339727	+	WDR7	0	3	6	2	8	0	9	10	-1.23333	YES
chr13	60558022	60565291	-	DIAPH3	10	2	6	3	11	5	18	19	0	YES
chr10	115657969	115661424	+	NHLRC2	3	2	6	6	2	4	11	12	0	YES
chr6	126242215	126243827	+	NCOA7	0	2	6	0	7	2	8	9	0.0766667	YES
chr14	58690575	58697116	+	ACTR10	6	1	6	0	14	0	13	14	0.34	YES
chr14	60616906	60619656	-	DHRS7	4	1	6	5	6	1	11	12	0.43	YES
chr1	180053314	180056712	+	CEP350	3	1	6	2	8	1	10	11	0.206667	YES
chr10	70500419	70502132	+	CCAR1	3	1	6	2	9	0	10	11	0	YES
chr8	22031229	22033655	+	BMP1	1	1	6	2	6	1	8	9	0	YES
chr2	73226144	73227559	-	SFXN5	0	1	6	2	5	1	7	8	0	YES
chr16	74508531	74511293	-	GLG1	4	0	6	2	9	0	10	11	0	YES
chr9	114820967	114825216	-	SUSD1	1	0	6	1	7	0	7	8	0	YES
chr18	18603642	18608736	-	ROCK1	3	4	5	5	4	4	12	13	0	YES
chr20	31973577	31975128	-	CDK5RAP1	1	4	5	3	8	0	10	11	0.566667	YES
chrX	41056764	41057780	+	USP9X	4	3	5	0	12	1	12	13	0.03	YES
chrX	106016391	106028294	+	RNF128	4	2	5	8	3	1	11	12	0	YES
chr9	14146807	14150143	-	NFIB	3	2	5	4	7	0	10	11	0	YES
chr4	8451616	8453686	+	C4orf23	0	2	5	2	6	0	7	8	-1.39	YES
chr4	84188928	84191012	-	COQ2	3	1	5	2	6	2	9	10	-0.1	YES
chrX	41076597	41077624	+	USP9X	3	1	5	2	5	3	9	10	0.0466667	YES
chr11	77702346	77705635	-	INTS4	2	1	5	6	3	0	8	9	-0.653333	YES
chr12	27064251	27066389	-	C12orf11	2	1	5	1	8	0	8	9	0	YES
chr1	162567649	162569060	+	UAP1	1	1	5	0	6	2	7	8	-0.0966667	YES
chr5	52394498	52396240	-	MOCS2	1	1	5	4	3	1	7	8	-0.00333333	YES
chr12	8814703	8815222	-	MFAP5	0	1	5	0	4	3	6	7	-0.01	YES
chr2	197008411	197010634	-	STK17B	0	1	5	1	4	2	6	7	0.613333	YES
chr12	32977097	32993961	-	PKP2	6	0	5	5	2	5	11	12	0	YES
chr19	17386635	17387303	+	C19orf62	2	0	5	2	6	0	7	8	-0.2	YES
chr3	137958371	137960624	+	ARMC8	2	0	5	3	4	1	7	8	0	YES
chr10	129213503	129216628	+	DOCK1	1	0	5	0	2	5	6	7	-1.36667	YES
chr11	95509188	95511985	-	FAM76B	1	0	5	5	0	2	6	7	2.31333	YES
chr12	33003908	33021860	-	PKP2	1	0	5	2	3	2	6	7	0	YES
chr4	186185765	186188122	+	SNX25	0	0	5	0	5	1	5	6	0	YES
chr7	124555701	124568868	-	POT1	5	4	4	4	10	0	13	14	0	YES
chr17	56056675	56057963	-	VEZF1	5	3	4	1	7	5	12	13	0.866667	YES
chr2	135988498	136023103	-	ZRANB3	6	2	4	4	9	0	12	13	1.51667	YES
chr15	52433470	52439655	-	GNB5	5	2	4	7	4	1	11	12	0.133333	YES
chr6	11005793	11010978	-	ELOVL2	3	2	4	1	9	0	9	10	-1.01	YES
chr1	184702125	184703664	-	EDEM3	2	2	4	1	6	2	8	9	0.32	YES
chr9	123594224	123595589	-	PSMD5	2	2	4	5	4	0	8	9	0.443333	YES
chr6	13657509	13659011	-	RANBP9	0	2	4	7	0	0	6	7	0	YES
chr16	58583803	58585035	-	CNOT1	3	1	4	7	1	1	8	9	0.1	YES
chr5	170319558	170323053	+	RANBP17	3	1	4	3	2	4	8	9	0.433333	YES
chr2	88870560	88874183	-	EIF2AK3	2	1	4	4	3	1	7	8	0.476667	YES
chr15	41137228	41145321	+	SPINT1	1	1	4	1	6	0	6	7	0	YES
chr7	33169654	33185853	+	BBS9	1	1	4	2	5	0	6	7	0	YES
chr18	61060783	61064266	-	VPS4B	0	1	4	1	3	2	5	6	0.12	YES
chr6	13794180	13799064	-	CCDC90A	5	0	4	0	10	0	9	10	-0.23	YES
chr16	8997260	8998291	-	USP7	4	0	4	6	1	2	8	9	-0.103333	YES
chr12	79986474	79988108	-	PAWR	3	0	4	4	3	1	7	8	-0.163333	YES
chr3	142090171	142094639	-	XRN1	3	0	4	2	6	0	7	8	0	YES
chr8	126040950	126044482	-	KIAA0196	3	0	4	5	3	0	7	8	-0.0466667	YES
chr15	52700338	52702529	-	MYO5A	2	0	4	0	7	0	6	7	0	YES
chr4	113299055	113303553	+	ALPK1	2	0	4	0	6	1	6	7	0	YES
chr6	122777796	122779664	-	SERINC1	2	0	4	1	5	1	6	7	0	YES
chr1	10057390	10067627	+	RBP7	1	0	4	2	4	0	5	6	0.296667	YES
chr14	39777792	39782543	+	CTAGE5	0	0	4	0	5	0	4	5	0	YES
chr16	57075978	57077426	+	NLRC5	0	0	4	5	0	0	4	5	1.96	YES
chr19	16301385	16301697	+	FAM32A	0	0	4	0	2	3	4	5	0.0266667	YES
chr6	13588697	13591900	+	SIRT5	0	0	4	0	5	0	4	5	-0.593333	YES
chr8	86118456	86119659	+	E2F5	0	0	4	0	5	0	4	5	-0.413333	YES
chr5	61786048	61789824	+	IPO11	7	3	3	3	7	4	13	14	0	YES
chr5	127693088	127697415	-	FBN2	7	3	3	2	12	0	13	14	0.253333	YES
chr17	6499664	6502556	-	KIAA0753	3	3	3	1	9	0	9	10	0	YES
chr1	32790155	32792539	+	HDAC1	1	3	3	2	6	0	7	8	-0.0333333	YES
chr3	15275481	15276531	+	CAPN7	1	3	3	3	4	1	7	8	0.473333	YES
chr4	56759947	56762882	+	EXOC1	1	3	3	2	2	4	7	8	0.21	YES
chr11	118461222	118463423	+	ARCN1	3	2	3	1	6	2	8	9	0	YES
chr2	200826652	200828455	+	C2orf47	2	2	3	1	5	2	7	8	0.246667	YES
chr9	107595053	107599260	-	ABCA1	2	2	3	5	3	0	7	8	0	YES
chr9	125620373	125620947	-	RC3H2	0	2	3	0	6	0	5	6	0	YES
chr15	28493883	28499485	-	HERC2	9	1	3	4	9	1	13	14	3.89667	YES
chr5	118814717	118824886	+	HSD17B4	5	1	3	7	2	1	9	10	0	YES
chr3	97678024	97680432	-	MINA	4	1	3	2	7	0	8	9	0.116667	YES
chr1	116933034	116933403	+	ATP1A1	3	1	3	5	2	1	7	8	0.0533333	YES
chr5	94884420	94886284	-	TTC37	3	1	3	2	4	2	7	8	0	YES
chr8	30560758	30565588	-	GSR	3	1	3	2	5	1	7	8	0	YES
chr16	72127951	72130037	+	DHX38	2	1	3	4	2	1	6	7	0	YES
chrX	53657987	53658365	-	HUWE1	2	1	3	1	3	3	6	7	-0.08	YES
chr12	29523156	29524460	-	ERGIC2	1	1	3	0	6	0	5	6	-0.09	YES
chr17	49079207	49082572	-	SPAG9	1	1	3	0	1	5	5	6	0	YES
chr4	13588100	13589322	-	BOD1L	1	1	3	2	4	0	5	6	-0.23	YES
chr5	68414456	68417520	+	SLC30A5	1	1	3	3	1	2	5	6	0.256667	YES
chr1	220197799	220198473	-	EPRS	0	1	3	0	5	0	4	5	0.03	YES
chr10	128817100	128821463	+	DOCK1	0	1	3	1	2	2	4	5	0	YES
chr11	46679173	46680941	+	ATG13	0	1	3	0	2	3	4	5	0.203333	YES
chr2	47202243	47205930	+	TTC7A	0	1	3	0	5	0	4	5	0	YES
chr3	47361274	47364057	+	KLHL18	0	1	3	2	3	0	4	5	0	YES
chr15	50881854	50884107	-	TRPM7	4	0	3	1	5	2	7	8	0	YES
chr1	155287813	155287959	+	FDPS	3	0	3	1	6	0	6	7	0.0333333	YES
chr12	97337541	97338416	+	NEDD1	3	0	3	3	4	0	6	7	0.0233333	YES
chr19	36558913	36562457	+	WDR62	3	0	3	0	6	1	6	7	0.0433333	YES
chr4	103514726	103516048	+	NFKB1	3	0	3	2	2	3	6	7	0	YES
chr11	13371618	13375847	+	ARNTL	2	0	3	3	0	3	5	6	0	YES
chr19	9641744	9643520	-	ZNF426	2	0	3	2	4	0	5	6	0.563333	YES
chr4	170663259	170669894	-	C4orf27	2	0	3	2	3	1	5	6	-0.146667	YES
chr11	77921791	77924691	+	USP35	1	0	3	0	5	0	4	5	-1.41	YES
chr11	126146419	126146965	+	FOXRED1	1	0	3	3	1	1	4	5	0.81	YES
chr12	62931487	62931875	+	MON2	1	0	3	0	5	0	4	5	0	YES
chr15	65421509	65425249	-	PDCD7	1	0	3	1	3	1	4	5	0	YES
chr2	98419254	98421550	-	TMEM131	1	0	3	2	3	0	4	5	0	YES
chr4	71629387	71630191	+	RUFY3	1	0	3	1	4	0	4	5	0	YES
chr1	21923758	21924178	-	RAP1GAP	0	0	3	4	0	0	3	4	-1.33333	YES
chr13	110850979	110853200	-	COL4A1	0	0	3	4	0	0	3	4	0	YES
chr14	69585948	69588933	-	DCAF5	0	0	3	0	4	0	3	4	0	YES
chr14	102505884	102505974	+	DYNC1H1	0	0	3	0	4	0	3	4	0	YES
chr17	55195816	55196342	+	AKAP1	0	0	3	4	0	0	3	4	0	YES
chr2	231074724	231076184	-	SP110	0	0	3	0	4	0	3	4	0	YES
chr21	37757750	37758357	+	CHAF1B	0	0	3	0	4	0	3	4	-0.06	YES
chr22	50688133	50688288	-	HDAC10	0	0	3	0	1	3	3	4	0.74	YES
chr4	108603290	108608194	-	PAPSS1	0	0	3	2	1	1	3	4	0	YES
chr4	151830010	151835346	-	LRBA	0	0	3	2	0	2	3	4	-0.0466667	YES
chr6	24416742	24418311	+	MRS2	0	0	3	0	4	0	3	4	0	YES
chr6	160501308	160504981	+	IGF2R	0	0	3	1	2	1	3	4	0	YES
chr8	28984029	28984638	-	KIF13B	0	0	3	2	2	0	3	4	0	YES
chrX	107393528	107395031	+	ATG4A	0	0	3	4	0	0	3	4	1.35	YES
chr6	37414226	37418026	+	FTSJD2	3	5	2	3	8	0	10	11	-0.156667	YES
chr17	47882808	47886480	+	MYST2	3	4	2	5	4	1	9	10	0	YES
chr2	191334582	191353382	+	MFSD6	1	4	2	4	3	1	7	8	2.64333	YES
chr7	139741640	139746683	-	PARP12	0	4	2	5	2	0	6	7	0.133333	YES
chr7	8153675	8167502	-	ICA1	2	3	2	1	7	0	7	8	-1.01	YES
chr10	105765794	105767934	+	SLK	8	2	2	3	7	3	12	13	0.0833333	YES
chr10	18825126	18827108	+	CACNB2	4	2	2	4	5	0	8	9	-0.133333	YES
chr2	219103574	219104113	+	ARPC2	3	2	2	2	6	0	7	8	-0.0166667	YES
chr1	201120981	201122985	-	TMEM9	1	2	2	3	3	0	5	6	-0.0166667	YES
chr1	215792634	215793398	+	KCTD3	1	2	2	5	1	0	5	6	0.15	YES
chr2	64169696	64171733	-	VPS54	1	2	2	1	5	0	5	6	0	YES
chr3	58063022	58064443	+	FLNB	1	2	2	4	2	0	5	6	0	YES
chr6	157520042	157521838	+	ARID1B	1	2	2	3	3	0	5	6	-0.653333	YES
chr5	61688062	61688752	-	DIMT1L	0	2	2	3	1	1	4	5	0.21	YES
chr1	62923377	62939652	-	DOCK7	4	1	2	5	3	0	7	8	1.08333	YES
chr8	91029555	91031136	+	DECR1	4	1	2	3	5	0	7	8	0.0733333	YES
chr12	112708264	112711458	-	C12orf51	3	1	2	2	5	0	6	7	0.563333	YES
chr20	33500991	33501195	+	ACSS2	3	1	2	4	3	0	6	7	0	YES
chr3	193384179	193384958	+	OPA1	3	1	2	0	7	0	6	7	0	YES
chr2	25610248	25611070	-	DTNB	2	1	2	0	6	0	5	6	0.456667	YES
chr2	26587239	26587699	+	EPT1	2	1	2	0	5	1	5	6	0.193333	YES
chr2	37276987	37280644	-	HEATR5B	2	1	2	2	4	0	5	6	0	YES
chr6	43519191	43521109	-	XPO5	2	1	2	6	0	0	5	6	-0.1	YES
chr7	43840172	43843274	+	BLVRA	2	1	2	2	4	0	5	6	-0.01	YES
chr8	28309994	28314282	-	FBXO16	2	1	2	0	6	0	5	6	-0.633333	YES
chr9	36581737	36583623	+	MELK	2	1	2	3	3	0	5	6	0	YES
chr12	124177271	124179388	+	TCTN2	1	1	2	0	2	3	4	5	-0.423333	YES
chr2	183584897	183586751	+	DNAJC10	1	1	2	0	3	2	4	5	0	YES
chr4	152592455	152593913	-	PET112L	1	1	2	0	5	0	4	5	1.17333	YES
chr5	131545025	131545976	-	P4HA2	1	1	2	0	5	0	4	5	-0.09	YES
chr6	42222665	42224465	-	TRERF1	1	1	2	0	5	0	4	5	0	YES
chr1	54427796	54427968	+	LRRC42	0	1	2	0	4	0	3	4	-0.163333	YES
chr1	226016614	226019479	+	EPHX1	0	1	2	3	1	0	3	4	0	YES
chr10	74937734	74952313	+	FAM149B1	0	1	2	0	3	1	3	4	0	YES
chr11	10783602	10784977	+	CTR9	0	1	2	0	3	1	3	4	0.183333	YES
chr12	4626356	4627223	-	C12orf4	0	1	2	0	3	1	3	4	0.996667	YES
chr16	920067	920728	-	LMF1	0	1	2	4	0	0	3	4	0	YES
chr19	49299976	49300193	-	BCAT2	0	1	2	0	1	3	3	4	1.17333	YES
chr2	46844438	46845911	+	CRIPT	0	1	2	4	0	0	3	4	0.12	YES
chr2	69633215	69642316	-	NFU1	0	1	2	2	2	0	3	4	0.0733333	YES
chr10	112337673	112338385	+	SMC3	5	0	2	0	8	0	7	8	0	YES
chr17	45198384	45199809	-	CDC27	5	0	2	2	5	1	7	8	-0.233333	YES
chr3	182591804	182597283	+	ATP11B	5	0	2	5	3	0	7	8	0	YES
chr1	212218101	212220492	+	DTL	3	0	2	2	4	0	5	6	-0.123333	YES
chr2	191109695	191110879	-	HIBCH	3	0	2	0	6	0	5	6	0	YES
chr2	242066867	242072288	-	PASK	3	0	2	0	4	2	5	6	0	YES
chr21	34619196	34621013	+	IFNAR2	3	0	2	3	3	0	5	6	0	YES
chr12	70723351	70724066	+	CNOT2	2	0	2	3	2	0	4	5	-0.38	YES
chr2	150432356	150432950	-	MMADHC	2	0	2	0	2	3	4	5	-0.00333333	YES
chr3	97487075	97499002	+	ARL6	2	0	2	1	3	1	4	5	0	YES
chr5	118813197	118814528	+	HSD17B4	2	0	2	3	0	2	4	5	0	YES
chr7	123334923	123335876	-	WASL	2	0	2	2	3	0	4	5	0.11	YES
chr7	156518220	156518457	-	LMBR1	2	0	2	1	4	0	4	5	-0.0666667	YES
chr9	95108070	95142044	+	CENPP	2	0	2	4	1	0	4	5	0	YES
chr1	29362436	29365765	+	EPB41	1	0	2	0	3	1	3	4	0	YES
chr1	40872542	40874324	+	SMAP2	1	0	2	0	4	0	3	4	-0.903333	YES
chr1	173794495	173795824	+	DARS2	1	0	2	3	0	1	3	4	-0.0666667	YES
chr10	58119294	58119447	-	ZWINT	1	0	2	0	4	0	3	4	-0.05	YES
chr11	20114746	20117217	+	NAV2	1	0	2	0	3	1	3	4	1.33333	YES
chr11	118922664	118922801	-	HYOU1	1	0	2	1	3	0	3	4	0.576667	YES
chr15	49073557	49074335	-	CEP152	1	0	2	0	3	1	3	4	0	YES
chr16	68264219	68264291	-	ESRP2	1	0	2	2	2	0	3	4	1.3	YES
chr2	54042073	54045034	+	ERLEC1	1	0	2	0	4	0	3	4	-0.276667	YES
chr20	3005268	3007332	+	PTPRA	1	0	2	4	0	0	3	4	0	YES
chr20	18511448	18513307	+	SEC23B	1	0	2	0	4	0	3	4	-0.23	YES
chr5	61779121	61779836	+	IPO11	1	0	2	0	4	0	3	4	0.516667	YES
chr6	42612075	42612210	+	UBR2	1	0	2	3	1	0	3	4	-0.913333	YES
chr7	5751471	5752345	-	RNF216	1	0	2	0	2	2	3	4	0	YES
chr7	151049969	151052853	+	NUB1	1	0	2	3	1	0	3	4	-0.403333	YES
chrX	70349280	70349529	+	MED12	1	0	2	3	0	1	3	4	0.156667	YES
chr1	28562782	28562871	+	ATPIF1	0	0	2	3	0	0	2	3	0.01	YES
chr1	200878526	200880580	+	C1orf106	0	0	2	0	3	0	2	3	-0.68	YES
chr10	102824179	102824257	+	KAZALD1	0	0	2	0	3	0	2	3	-2.61	YES
chr11	66360772	66361112	+	CCS	0	0	2	2	1	0	2	3	-0.99	YES
chr11	75133813	75134735	-	KLHL35	0	0	2	0	3	0	2	3	0.03	YES
chr11	134046282	134047113	-	NCAPD3	0	0	2	1	1	1	2	3	0	YES
chr12	88465704	88470998	-	CEP290	0	0	2	2	1	0	2	3	0	YES
chr12	88535112	88535676	-	CEP290	0	0	2	1	2	0	2	3	-1.32333	YES
chr13	52511816	52513186	-	ATP7B	0	0	2	0	0	3	2	3	0	YES
chr14	58669646	58674653	+	ACTR10	0	0	2	0	1	2	2	3	0	YES
chr15	51216202	51217294	+	AP4E1	0	0	2	1	2	0	2	3	0	YES
chr15	75146461	75146921	-	SCAMP2	0	0	2	0	0	3	2	3	-0.106667	YES
chr16	57157386	57159771	+	CPNE2	0	0	2	0	3	0	2	3	-0.163333	YES
chr16	88891278	88893109	-	GALNS	0	0	2	0	0	3	2	3	0.236667	YES
chr17	21092177	21094260	+	DHRS7B	0	0	2	2	1	0	2	3	-1.36	YES
chr17	29280369	29281495	+	ADAP2	0	0	2	0	3	0	2	3	0	YES
chr17	74470225	74470454	-	RHBDF2	0	0	2	3	0	0	2	3	-0.28	YES
chr17	74772624	74774269	+	MFSD11	0	0	2	0	3	0	2	3	-1.13333	YES
chr19	42841359	42847628	+	MEGF8	0	0	2	0	3	0	2	3	0	YES
chr19	46355644	46355739	-	SYMPK	0	0	2	2	1	0	2	3	0.0566667	YES
chr19	49139248	49140112	-	DBP	0	0	2	0	2	1	2	3	-3.03333	YES
chr2	61406307	61408454	+	AHSA2	0	0	2	2	1	0	2	3	-0.173333	YES
chr2	121740457	121742046	+	GLI2	0	0	2	0	2	1	2	3	-0.53	YES
chr2	228401421	228401616	+	AGFG1	0	0	2	0	1	2	2	3	0	YES
chr20	5932810	5933069	+	MCM8	0	0	2	1	0	2	2	3	0	YES
chr20	33514755	33514889	+	ACSS2	0	0	2	2	0	1	2	3	-0.413333	YES
chr22	29446937	29449566	+	ZNRF3	0	0	2	3	0	0	2	3	-0.0466667	YES
chr4	39188225	39191275	+	WDR19	0	0	2	0	0	3	2	3	0	YES
chr6	43033440	43034043	+	KLC4	0	0	2	0	3	0	2	3	-3.21	YES
chr6	56457157	56458460	-	DST	0	0	2	3	0	0	2	3	0	YES
chr6	86177001	86180954	+	NT5E	0	0	2	2	0	1	2	3	0	YES
chr6	96974312	96976377	+	KIAA0776	0	0	2	1	2	0	2	3	0	YES
chr8	42320609	42323294	-	SLC20A2	0	0	2	0	2	1	2	3	-0.266667	YES
chr9	20882056	20885107	+	KIAA1797	0	0	2	0	2	1	2	3	-0.25	YES
chr9	128509933	128510828	+	PBX3	0	0	2	2	1	0	2	3	0.456667	YES
chr9	130166083	130166237	+	SLC2A8	0	0	2	0	3	0	2	3	0.213333	YES
chrX	46529155	46531985	-	SLC9A7	0	0	2	1	2	0	2	3	0	YES
chrX	71887324	71895919	-	PHKA1	0	0	2	0	0	3	2	3	0	YES
chr8	22380263	22384904	+	PPP3CC	5	7	1	5	6	3	13	14	1.44	YES
chr12	111990235	111990709	-	ATXN2	11	6	1	6	8	5	18	19	0	YES
chr13	79213207	79216256	-	RNF219	4	6	1	3	7	2	11	12	-0.0666667	YES
chr13	37618319	37619383	-	FAM48A	3	4	1	4	1	4	8	9	0.243333	YES
chr14	31841116	31844021	-	HEATR5A	2	4	1	1	7	0	7	8	-0.0733333	YES
chr14	104497601	104498353	+	TDRD9	2	4	1	0	6	2	7	8	0	YES
chr3	46021323	46023061	-	FYCO1	1	4	1	5	2	0	6	7	0	YES
chr3	153905627	153909077	+	ARHGEF26	4	3	1	4	4	1	8	9	0	YES
chr7	92118738	92119027	-	PEX1	3	3	1	4	2	2	7	8	-1.69	YES
chr17	62589692	62594499	-	SMURF2	2	3	1	3	2	2	6	7	0	YES
chr3	176750925	176751985	-	TBL1XR1	2	3	1	5	2	0	6	7	0.203333	YES
chr7	150085590	150093600	+	ZNF775	2	3	1	7	0	0	6	7	0	YES
chr16	67662456	67663300	+	CTCF	1	3	1	2	3	1	5	6	0	YES
chr3	4703927	4704748	+	ITPR1	1	3	1	2	4	0	5	6	0	YES
chr3	129152091	129152692	-	MBD4	6	2	1	7	3	0	9	10	0.13	YES
chr4	39507369	39510185	-	UGDH	5	2	1	2	5	2	8	9	0.04	YES
chr7	151048569	151049897	+	NUB1	5	2	1	0	8	1	8	9	-0.0533333	YES
chr14	64486812	64488032	+	SYNE2	4	2	1	4	4	0	7	8	0	YES
chr22	41543951	41545041	+	EP300	4	2	1	1	6	1	7	8	0	YES
chr12	28410179	28412296	+	CCDC91	3	2	1	3	4	0	6	7	0	YES
chr12	123801904	123804446	-	SBNO1	3	2	1	4	3	0	6	7	-0.27	YES
chr17	30521127	30525965	+	RHOT1	3	2	1	5	1	1	6	7	-0.00666667	YES
chr7	32591908	32593338	+	AVL9	3	2	1	4	3	0	6	7	-0.456667	YES
chr10	70161495	70164427	-	RUFY2	2	2	1	0	6	0	5	6	0	YES
chr1	205119923	205126400	-	DSTYK	1	2	1	1	3	1	4	5	0.47	YES
chr3	49020413	49020631	+	ARIH2	1	2	1	0	4	1	4	5	-0.12	YES
chr8	38187412	38188948	-	WHSC1L1	1	2	1	1	4	0	4	5	0	YES
chr8	103226387	103231041	-	RRM2B	1	2	1	0	4	1	4	5	0	YES
chr1	16525240	16525644	-	ARHGEF19	0	2	1	3	1	0	3	4	2.32667	YES
chr11	13380139	13381891	+	ARNTL	0	2	1	2	1	1	3	4	0	YES
chr11	13435198	13438704	-	BTBD10	0	2	1	3	1	0	3	4	0	YES
chr11	48175439	48177352	+	PTPRJ	0	2	1	0	4	0	3	4	0	YES
chr12	31542433	31545200	-	DENND5B	0	2	1	3	1	0	3	4	-1.75333	YES
chr12	56120580	56120673	-	CD63	0	2	1	4	0	0	3	4	-0.0133333	YES
chr12	123073364	123075153	+	KNTC1	0	2	1	0	4	0	3	4	0	YES
chr17	7155916	7156088	+	C17orf81	0	2	1	0	0	4	3	4	-0.223333	YES
chr17	58124767	58125624	-	HEATR6	0	2	1	0	3	1	3	4	-0.996667	YES
chr4	79188090	79188394	+	FRAS1	0	2	1	0	3	1	3	4	0	YES
chr6	76545674	76550301	+	MYO6	0	2	1	4	0	0	3	4	0	YES
chr6	152603116	152605112	-	SYNE1	0	2	1	4	0	0	3	4	0	YES
chr7	105516327	105516823	-	ATXN7L1	0	2	1	2	2	0	3	4	0	YES
chr8	29007901	29013242	-	KIF13B	0	2	1	1	3	0	3	4	0	YES
chr8	142170887	142173431	+	DENND3	5	1	1	3	3	2	7	8	0	YES
chr1	227203899	227204627	-	CDC42BPA	3	1	1	2	1	3	5	6	-0.266667	YES
chr14	92600700	92601710	+	CPSF2	3	1	1	2	1	3	5	6	-0.223333	YES
chr2	54849625	54850615	+	SPTBN1	3	1	1	0	6	0	5	6	0.00333333	YES
chr20	3546080	3553377	+	ATRN	3	1	1	0	1	5	5	6	0	YES
chr6	7601758	7602855	+	SNRNP48	3	1	1	5	1	0	5	6	0.446667	YES
chr6	42574390	42579908	+	UBR2	3	1	1	2	3	1	5	6	0.21	YES
chr7	6183828	6185146	+	USP42	3	1	1	2	4	0	5	6	0.456667	YES
chr15	51221366	51223001	+	AP4E1	2	1	1	1	3	1	4	5	0	YES
chr22	38150992	38151107	+	TRIOBP	2	1	1	0	5	0	4	5	1.03333	YES
chr3	130718504	130720063	+	ATP2C1	2	1	1	0	5	0	4	5	-0.246667	YES
chr4	88977420	88979134	+	PKD2	2	1	1	2	2	1	4	5	-0.286667	YES
chr4	140616422	140624608	+	MGST2	2	1	1	3	2	0	4	5	-0.0933333	YES
chr1	220247414	220253068	-	BPNT1	1	1	1	2	1	1	3	4	0	YES
chr10	81061970	81063771	+	ZMIZ1	1	1	1	2	0	2	3	4	0.496667	YES
chr11	31616449	31625314	+	ELP4	1	1	1	0	0	4	3	4	0	YES
chr12	88478630	88479815	-	CEP290	1	1	1	2	2	0	3	4	0	YES
chr13	111091016	111092135	+	COL4A2	1	1	1	4	0	0	3	4	0	YES
chr15	31266660	31267133	-	MTMR10	1	1	1	0	4	0	3	4	0	YES
chr15	50886811	50888451	-	TRPM7	1	1	1	0	4	0	3	4	0	YES
chr2	61006911	61007841	+	PAPOLG	1	1	1	4	0	0	3	4	0.29	YES
chr2	99156139	99160339	+	INPP4A	1	1	1	1	1	2	3	4	0	YES
chr2	234432136	234433137	-	USP40	1	1	1	2	2	0	3	4	0	YES
chr5	127488498	127493744	+	SLC12A2	1	1	1	1	3	0	3	4	0.68	YES
chr6	152540321	152541976	-	SYNE1	1	1	1	0	2	2	3	4	1.26667	YES
chr7	86544177	86547757	-	KIAA1324L	1	1	1	4	0	0	3	4	0	YES
chrX	31222236	31224698	-	DMD	1	1	1	0	3	1	3	4	0	YES
chr10	5136721	5138601	+	AKR1C3	0	1	1	0	3	0	2	3	-0.02	YES
chr15	42840655	42840890	-	LRRC57	0	1	1	3	0	0	2	3	-4.44	YES
chr15	48730115	48733917	-	FBN1	0	1	1	2	1	0	2	3	0	YES
chr16	71798352	71798548	-	AP1G1	0	1	1	0	3	0	2	3	0	YES
chr17	26885609	26887066	-	PIGS	0	1	1	0	3	0	2	3	-0.5	YES
chr19	41920063	41925039	+	BCKDHA	0	1	1	1	1	1	2	3	0.16	YES
chr2	72722669	72723582	-	EXOC6B	0	1	1	0	3	0	2	3	-0.31	YES
chr2	73447911	73448292	+	SMYD5	0	1	1	0	3	0	2	3	0	YES
chr20	44578038	44578123	-	ZNF335	0	1	1	0	2	1	2	3	-0.403333	YES
chr4	56482553	56496568	-	NMU	0	1	1	3	0	0	2	3	0	YES
chr6	84632190	84634188	+	CYB5R4	0	1	1	0	3	0	2	3	0.21	YES
chrX	19042067	19045336	-	GPR64	0	1	1	1	0	2	2	3	0	YES
chrX	38129086	38132638	-	RPGR	0	1	1	2	1	0	2	3	-0.71	YES
chr10	129137349	129141909	+	DOCK1	5	0	1	3	4	0	6	7	0	YES
chr11	3714606	3716678	-	NUP98	5	0	1	2	5	0	6	7	-0.0766667	YES
chr14	64428344	64430616	+	SYNE2	5	0	1	1	3	3	6	7	0	YES
chr2	209177020	209179017	+	PIKFYVE	4	0	1	3	2	1	5	6	0	YES
chrX	107422669	107423744	-	COL4A6	4	0	1	4	2	0	5	6	-0.53	YES
chr1	65874467	65876932	+	DNAJC6	3	0	1	1	2	2	4	5	-0.756667	YES
chr17	78272319	78280051	+	RNF213	3	0	1	1	3	1	4	5	0	YES
chr3	196449428	196454793	+	PIGX	3	0	1	2	3	0	4	5	-0.2	YES
chr4	166226878	166231704	+	KLHL2	3	0	1	0	5	0	4	5	0	YES
chr5	112406932	112418556	-	MCC	3	0	1	5	0	0	4	5	0	YES
chr8	141749207	141753328	-	PTK2	3	0	1	1	3	1	4	5	0	YES
chr9	101900372	101904817	+	TGFBR1	3	0	1	0	3	2	4	5	0	YES
chr1	85484941	85486752	-	MCOLN3	2	0	1	0	0	4	3	4	-0.673333	YES
chr11	85342853	85345129	+	TMEM126B	2	0	1	2	2	0	3	4	-0.213333	YES
chr12	102291709	102295068	+	DRAM1	2	0	1	1	3	0	3	4	0	YES
chr12	105569861	105570653	-	APPL2	2	0	1	2	2	0	3	4	0.0266667	YES
chr14	21487902	21488078	-	NDRG2	2	0	1	2	2	0	3	4	-0.0833333	YES
chr14	71434961	71435737	+	PCNX	2	0	1	0	1	3	3	4	1.23333	YES
chr15	44900804	44903037	-	SPG11	2	0	1	0	4	0	3	4	0	YES
chr15	52538240	52539113	-	MYO5C	2	0	1	2	2	0	3	4	0.443333	YES
chr17	2569385	2570285	+	PAFAH1B1	2	0	1	4	0	0	3	4	0	YES
chr2	75917208	75917763	-	C2orf3	2	0	1	0	4	0	3	4	-2.81	YES
chr2	98458401	98460607	-	TMEM131	2	0	1	3	1	0	3	4	0	YES
chr4	104066492	104066679	-	CENPE	2	0	1	0	4	0	3	4	-0.686667	YES
chr6	13641540	13642710	-	RANBP9	2	0	1	1	3	0	3	4	0.146667	YES
chr6	33747957	33748853	-	LEMD2	2	0	1	2	2	0	3	4	0.136667	YES
chr6	90437675	90438649	-	MDN1	2	0	1	2	2	0	3	4	0	YES
chr6	99951742	99955303	-	USP45	2	0	1	0	4	0	3	4	0	YES
chr6	152453350	152454410	-	SYNE1	2	0	1	0	4	0	3	4	-0.653333	YES
chr8	109462722	109465290	+	TTC35	2	0	1	2	1	1	3	4	0	YES
chr1	43852342	43852528	-	MED8	1	0	1	0	0	3	2	3	0.0166667	YES
chr1	120491190	120491629	-	NOTCH2	1	0	1	0	0	3	2	3	-0.08	YES
chr11	47857362	47858438	-	NUP160	1	0	1	3	0	0	2	3	0	YES
chr11	65056560	65057269	+	POLA2	1	0	1	2	0	1	2	3	0	YES
chr11	117150976	117152029	+	RNF214	1	0	1	2	1	0	2	3	0	YES
chr12	6672938	6673056	-	NOP2	1	0	1	0	3	0	2	3	0.0666667	YES
chr12	113753282	113754330	-	SLC24A6	1	0	1	3	0	0	2	3	0	YES
chr14	55312571	55313816	-	GCH1	1	0	1	0	0	3	2	3	-0.8	YES
chr14	102499520	102499605	+	DYNC1H1	1	0	1	3	0	0	2	3	0.0366667	YES
chr15	65994850	65995210	-	DENND4A	1	0	1	0	3	0	2	3	-0.433333	YES
chr16	57063769	57063906	+	NLRC5	1	0	1	0	2	1	2	3	0	YES
chr17	30526051	30526423	+	RHOT1	1	0	1	1	2	0	2	3	0	YES
chr17	41347057	41348497	+	NBR1	1	0	1	0	3	0	2	3	0.0833333	YES
chr19	10574652	10577562	+	PDE4A	1	0	1	0	3	0	2	3	-1.23333	YES
chr19	39976932	39977036	+	TIMM50	1	0	1	2	1	0	2	3	0.0566667	YES
chr2	27911635	27916551	+	SLC4A1AP	1	0	1	0	2	1	2	3	-0.546667	YES
chr2	88887623	88888278	-	EIF2AK3	1	0	1	3	0	0	2	3	0	YES
chr2	121728183	121729516	+	GLI2	1	0	1	2	1	0	2	3	0	YES
chr2	220161545	220161706	-	PTPRN	1	0	1	3	0	0	2	3	-0.236667	YES
chr3	20181857	20187807	+	KAT2B	1	0	1	2	1	0	2	3	-0.953333	YES
chr3	47035511	47035944	+	NBEAL2	1	0	1	0	3	0	2	3	-0.273333	YES
chr3	132218653	132219637	+	DNAJC13	1	0	1	0	3	0	2	3	0	YES
chr3	169700700	169700948	+	SEC62	1	0	1	0	3	0	2	3	-0.0733333	YES
chr3	195013182	195015447	-	ACAP2	1	0	1	2	1	0	2	3	0	YES
chr4	56319992	56322063	-	CLOCK	1	0	1	1	1	1	2	3	0	YES
chr5	102260747	102262288	+	PAM	1	0	1	0	1	2	2	3	0	YES
chr5	150844164	150844634	+	SLC36A1	1	0	1	0	3	0	2	3	0	YES
chr6	13584458	13588562	+	SIRT5	1	0	1	1	2	0	2	3	0.67	YES
chr6	49403337	49407918	-	MUT	1	0	1	0	3	0	2	3	-0.0766667	YES
chr6	158565453	158567813	-	SERAC1	1	0	1	0	1	2	2	3	6.93333	YES
chr7	6088476	6089542	-	EIF2AK1	1	0	1	3	0	0	2	3	-0.0433333	YES
chr7	33303987	33312623	+	BBS9	1	0	1	2	1	0	2	3	-3.33333	YES
chr7	151807731	151810330	+	GALNT11	1	0	1	1	1	1	2	3	0.253333	YES
chr8	66636587	66637011	-	PDE7A	1	0	1	1	0	2	2	3	-0.22	YES
chr9	111689734	111692048	-	IKBKAP	1	0	1	0	3	0	2	3	0	YES
chr9	130476704	130476881	-	PTRH1	1	0	1	0	3	0	2	3	-0.25	YES
chr9	137642463	137642635	+	COL5A1	1	0	1	2	1	0	2	3	0	YES
chrX	122755439	122756608	-	THOC2	1	0	1	0	3	0	2	3	0	YES
chr1	6269600	6269983	+	RNF207	0	0	1	0	1	1	1	2	-0.583333	YES
chr1	10356724	10356954	+	KIF1B	0	0	1	1	1	0	1	2	0.17	YES
chr1	11893696	11893933	+	CLCN6	0	0	1	1	1	0	1	2	-0.94	YES
chr1	17314970	17316185	-	ATP13A2	0	0	1	2	0	0	1	2	-0.6	YES
chr1	46195442	46206572	-	IPP	0	0	1	0	2	0	1	2	0.3	YES
chr1	53279406	53279531	+	ZYG11B	0	0	1	0	0	2	1	2	-0.23	YES
chr1	64022919	64027379	+	EFCAB7	0	0	1	0	1	1	1	2	0.433333	YES
chr1	153947312	153948301	-	JTB	0	0	1	1	1	0	1	2	0.00666667	YES
chr1	231056341	231057166	-	TTC13	0	0	1	0	2	0	1	2	0	YES
chr1	249110862	249111020	-	SH3BP5L	0	0	1	2	0	0	1	2	-0.296667	YES
chr10	114428048	114428695	+	VTI1A	0	0	1	2	0	0	1	2	0	YES
chr11	8715678	8717009	-	ST5	0	0	1	0	2	0	1	2	-4	YES
chr11	45971809	45975077	-	PHF21A	0	0	1	0	2	0	1	2	0.583333	YES
chr11	47281531	47281959	+	NR1H3	0	0	1	2	0	0	1	2	-0.616667	YES
chr11	47744869	47745579	-	FNBP4	0	0	1	0	2	0	1	2	0.26	YES
chr11	108224608	108225537	+	ATM	0	0	1	0	2	0	1	2	0	YES
chr12	41316231	41318358	+	CNTN1	0	0	1	2	0	0	1	2	0	YES
chr12	51501130	51502903	-	TFCP2	0	0	1	0	2	0	1	2	0.0833333	YES
chr12	65116894	65122735	-	GNS	0	0	1	1	0	1	1	2	-0.04	YES
chr12	89885893	89890947	-	POC1B	0	0	1	0	1	1	1	2	0	YES
chr12	105570795	105571003	-	APPL2	0	0	1	2	0	0	1	2	-1.44667	YES
chr12	123343493	123343607	+	HIP1R	0	0	1	0	2	0	1	2	2	YES
chr13	21165160	21165756	+	IFT88	0	0	1	2	0	0	1	2	0	YES
chr13	21166544	21170288	+	IFT88	0	0	1	0	2	0	1	2	0	YES
chr13	25828103	25828522	-	MTMR6	0	0	1	1	1	0	1	2	0.543333	YES
chr13	49030486	49033823	+	RB1	0	0	1	2	0	0	1	2	0	YES
chr13	73335660	73335783	-	DIS3	0	0	1	0	0	2	1	2	0.736667	YES
chr13	77842073	77844126	-	MYCBP2	0	0	1	0	1	1	1	2	0	YES
chr13	110815909	110817208	-	COL4A1	0	0	1	2	0	0	1	2	0	YES
chr14	35005482	35008760	-	EAPP	0	0	1	2	0	0	1	2	-0.473333	YES
chr14	50788313	50789228	+	ATP5S	0	0	1	0	2	0	1	2	1.41333	YES
chr14	58814597	58817790	+	ARID4A	0	0	1	1	1	0	1	2	0	YES
chr14	89341454	89343637	+	TTC8	0	0	1	2	0	0	1	2	-0.98	YES
chr15	41146721	41146836	+	SPINT1	0	0	1	0	2	0	1	2	0.77	YES
chr15	62174936	62176326	-	VPS13C	0	0	1	1	1	0	1	2	0.606667	YES
chr15	73409199	73414865	+	NEO1	0	0	1	0	2	0	1	2	0	YES
chr16	1636277	1637198	-	IFT140	0	0	1	0	0	2	1	2	0.563333	YES
chr16	4746898	4747017	-	ANKS3	0	0	1	2	0	0	1	2	0.01	YES
chr16	15758719	15761142	+	NDE1	0	0	1	2	0	0	1	2	0	YES
chr16	29853162	29853235	+	MVP	0	0	1	2	0	0	1	2	0	YES
chr16	30004879	30004960	-	HIRIP3	0	0	1	0	2	0	1	2	-5.69667	YES
chr16	57153563	57155004	+	CPNE2	0	0	1	0	2	0	1	2	0.193333	YES
chr16	58549785	58549856	+	SETD6	0	0	1	0	2	0	1	2	-4.61667	YES
chr16	69969890	69970214	+	WWP2	0	0	1	0	2	0	1	2	0.203333	YES
chr16	70512363	70512453	+	FUK	0	0	1	0	2	0	1	2	1.81333	YES
chr16	70543925	70546141	-	COG4	0	0	1	0	2	0	1	2	0	YES
chr17	722786	725596	-	NXN	0	0	1	0	1	1	1	2	0	YES
chr17	2594977	2595054	-	KIAA0664	0	0	1	2	0	0	1	2	0.206667	YES
chr17	4725203	4725934	+	PLD2	0	0	1	1	1	0	1	2	-0.503333	YES
chr17	7229033	7229573	-	NEURL4	0	0	1	2	0	0	1	2	0.47	YES
chr17	29253937	29258906	+	ADAP2	0	0	1	0	1	1	1	2	0	YES
chr17	40879782	40880842	-	EZH1	0	0	1	0	0	2	1	2	0.296667	YES
chr17	56293605	56294026	-	MKS1	0	0	1	0	1	1	1	2	0.246667	YES
chr17	80391699	80393564	+	HEXDC	0	0	1	2	0	0	1	2	1.07667	YES
chr19	18288575	18288658	+	IFI30	0	0	1	2	0	0	1	2	0.0733333	YES
chr19	33980964	33984195	-	PEPD	0	0	1	0	2	0	1	2	0	YES
chr19	36038143	36038225	+	TMEM147	0	0	1	0	0	2	1	2	-0.126667	YES
chr19	37063295	37064041	-	ZNF529	0	0	1	0	2	0	1	2	-1.15	YES
chr19	41198943	41201893	-	ADCK4	0	0	1	0	1	1	1	2	-0.3	YES
chr19	45260981	45261502	+	BCL3	0	0	1	1	1	0	1	2	-0.793333	YES
chr19	47763680	47763844	+	CCDC9	0	0	1	2	0	0	1	2	0	YES
chr19	48220274	48221765	+	EHD2	0	0	1	2	0	0	1	2	-0.0866667	YES
chr19	49862757	49863100	-	TEAD2	0	0	1	2	0	0	1	2	0	YES
chr2	9658119	9658231	-	ADAM17	0	0	1	2	0	0	1	2	-0.233333	YES
chr2	70096997	70098876	+	GMCL1	0	0	1	0	2	0	1	2	0	YES
chr2	136479577	136480038	+	R3HDM1	0	0	1	0	0	2	1	2	-0.293333	YES
chr2	160027317	160028631	+	TANC1	0	0	1	2	0	0	1	2	0	YES
chr2	198262841	198263184	-	SF3B1	0	0	1	1	0	1	1	2	-0.0433333	YES
chr2	234402198	234405403	-	USP40	0	0	1	0	2	0	1	2	0	YES
chr2	242648798	242650791	+	ING5	0	0	1	2	0	0	1	2	0	YES
chr20	1143828	1144961	+	PSMF1	0	0	1	0	0	2	1	2	0.07	YES
chr20	3782748	3782927	+	CDC25B	0	0	1	2	0	0	1	2	-0.09	YES
chr20	5935337	5935747	+	MCM8	0	0	1	0	2	0	1	2	0.26	YES
chr20	33440076	33440191	-	GGT7	0	0	1	0	0	2	1	2	-0.126667	YES
chr20	60967552	60967975	-	CABLES2	0	0	1	1	1	0	1	2	0.423333	YES
chr21	34652224	34655398	+	IL10RB	0	0	1	0	2	0	1	2	0	YES
chr22	19959935	19960259	-	ARVCF	0	0	1	0	2	0	1	2	-1.15	YES
chr22	38028173	38028411	+	GGA1	0	0	1	2	0	0	1	2	-0.0266667	YES
chr22	38028523	38028607	+	GGA1	0	0	1	0	2	0	1	2	0.186667	YES
chr3	45153938	45159903	-	CDCP1	0	0	1	0	2	0	1	2	0	YES
chr3	69027587	69028818	-	C3orf64	0	0	1	0	2	0	1	2	-0.456667	YES
chr3	98541206	98541512	-	DCBLD2	0	0	1	0	2	0	1	2	0.896667	YES
chr3	123366275	123367817	-	MYLK	0	0	1	0	2	0	1	2	1.15	YES
chr3	130716598	130717137	+	ATP2C1	0	0	1	1	1	0	1	2	0.396667	YES
chr3	138117411	138119375	+	MRAS	0	0	1	0	2	0	1	2	0.263333	YES
chr3	138453647	138456548	-	PIK3CB	0	0	1	0	2	0	1	2	0	YES
chr3	145797045	145799524	-	PLOD2	0	0	1	0	2	0	1	2	-0.41	YES
chr3	179076791	179080145	+	MFN1	0	0	1	0	2	0	1	2	0.0766667	YES
chr3	196735837	196736488	-	MFI2	0	0	1	0	2	0	1	2	0	YES
chr3	197428018	197428578	-	KIAA0226	0	0	1	2	0	0	1	2	0	YES
chr4	1348636	1348904	+	KIAA1530	0	0	1	0	2	0	1	2	1.07333	YES
chr4	25256888	25258164	+	PI4K2B	0	0	1	2	0	0	1	2	0	YES
chr4	84216657	84222112	-	HPSE	0	0	1	0	2	0	1	2	-0.226667	YES
chr4	104017432	104020939	-	BDH2	0	0	1	2	0	0	1	2	0.716667	YES
chr5	54948552	54952542	-	SLC38A9	0	0	1	2	0	0	1	2	0	YES
chr5	61643052	61643874	+	KIF2A	0	0	1	0	1	1	1	2	0.02	YES
chr5	79745533	79746249	+	ZFYVE16	0	0	1	0	2	0	1	2	1.63	YES
chr5	127727849	127728827	-	FBN2	0	0	1	0	2	0	1	2	0	YES
chr5	131553042	131553444	-	P4HA2	0	0	1	0	0	2	1	2	0	YES
chr5	137524838	137525321	-	CDC23	0	0	1	0	2	0	1	2	-0.01	YES
chr5	148687177	148689518	+	AFAP1L1	0	0	1	2	0	0	1	2	0	YES
chr6	13618372	13620439	+	NOL7	0	0	1	2	0	0	1	2	-0.0466667	YES
chr6	35391926	35392105	+	PPARD	0	0	1	0	2	0	1	2	-0.243333	YES
chr6	76595812	76596560	+	MYO6	0	0	1	1	0	1	1	2	0	YES
chr6	108798139	108798394	+	LACE1	0	0	1	1	1	0	1	2	0	YES
chr7	26765185	26765541	-	SKAP2	0	0	1	2	0	0	1	2	0	YES
chr7	73811564	73814699	+	CLIP2	0	0	1	1	1	0	1	2	0	YES
chr7	107188626	107188722	-	COG5	0	0	1	1	1	0	1	2	0	YES
chr7	127731934	127732044	+	SND1	0	0	1	2	0	0	1	2	0.0133333	YES
chr8	20068828	20069162	+	ATP6V1B2	0	0	1	0	1	1	1	2	-0.113333	YES
chr8	30614405	30618404	+	UBXN8	0	0	1	2	0	0	1	2	-0.37	YES
chr8	90792389	90796277	+	RIPK2	0	0	1	0	1	1	1	2	0	YES
chr9	26956515	26961946	+	IFT74	0	0	1	1	1	0	1	2	0	YES
chr9	35717438	35717615	-	TLN1	0	0	1	1	1	0	1	2	0.116667	YES
chr9	79933508	79934487	+	VPS13A	0	0	1	0	2	0	1	2	0	YES
chr9	102783014	102784323	-	ERP44	0	0	1	0	2	0	1	2	0	YES
chr9	106876363	106876971	+	SMC2	0	0	1	2	0	0	1	2	0	YES
chr9	127660924	127661607	-	GOLGA1	0	0	1	2	0	0	1	2	-0.513333	YES
chr9	130217900	130219594	+	LRSAM1	0	0	1	0	2	0	1	2	0	YES
chr9	137686973	137687107	+	COL5A1	0	0	1	0	2	0	1	2	0	YES
chr9	139564174	139564365	+	EGFL7	0	0	1	0	2	0	1	2	-0.48	YES
chr9	139564462	139564620	+	EGFL7	0	0	1	0	2	0	1	2	0	YES
chrX	54160480	54161263	-	FAM120C	0	0	1	0	2	0	1	2	0	YES
chrX	71872502	71873284	-	PHKA1	0	0	1	0	0	2	1	2	0	YES
chrX	108780251	108781273	+	NXT2	0	0	1	0	0	2	1	2	-0.12	YES
chrX	133547997	133549045	+	PHF6	0	0	1	0	2	0	1	2	0	YES
chrX	149678317	149680273	+	MAMLD1	0	0	1	0	2	0	1	2	0	YES
chr1	46739889	46740209	+	RAD54L	0	7	0	2	6	0	7	8	0.256667	YES
chr9	125582916	125585294	-	PDCL	0	6	0	1	4	2	6	7	-0.0666667	YES
chr21	37785614	37787592	+	CHAF1B	1	5	0	2	5	0	6	7	-0.0933333	YES
chr5	93964630	93964796	+	ANKRD32	0	5	0	1	5	0	5	6	0	YES
chr11	17115933	17118603	-	PIK3C2A	2	4	0	4	2	1	6	7	-0.00333333	YES
chr3	113514787	113517089	+	ATP6V1A	0	4	0	1	3	1	4	5	-0.08	YES
chr1	179972423	179975588	+	CEP350	5	3	0	4	4	1	8	9	0	YES
chr12	50146333	50146755	+	TMBIM6	4	3	0	2	0	6	7	8	-0.0433333	YES
chr3	15719862	15720807	-	ANKRD28	4	3	0	0	6	2	7	8	-0.11	YES
chr1	204394870	204396775	-	PIK3C2B	3	3	0	3	3	1	6	7	0.103333	YES
chr10	61424081	61432527	-	SLC16A9	3	3	0	3	4	0	6	7	0	YES
chr2	27861899	27862909	+	GPN1	1	3	0	0	4	1	4	5	0.00666667	YES
chr8	59544106	59547747	-	NSMAF	1	3	0	0	3	2	4	5	0	YES
chr17	35929027	35930735	-	SYNRG	0	3	0	0	2	2	3	4	0	YES
chr8	42022675	42022944	+	AP3M2	0	3	0	4	0	0	3	4	-0.453333	YES
chr9	125864043	125865369	+	RABGAP1	0	3	0	1	1	2	3	4	-0.54	YES
chr13	28011411	28014125	-	MTIF3	6	2	0	7	2	0	8	9	-1.63	YES
chr12	2074860	2077009	-	DCP1B	3	2	0	3	3	0	5	6	0.68	YES
chr9	32418196	32418325	+	ACO1	2	2	0	0	5	0	4	5	0	YES
chr10	94372888	94373133	+	KIF11	1	2	0	1	3	0	3	4	0	YES
chr10	103792930	103793039	-	C10orf76	1	2	0	3	1	0	3	4	0	YES
chr12	27538494	27540160	+	ARNTL2	1	2	0	1	3	0	3	4	0	YES
chr12	105464583	105467638	-	ALDH1L2	1	2	0	4	0	0	3	4	0	YES
chr15	35830669	35834613	-	ATPBD4	1	2	0	0	4	0	3	4	0	YES
chr20	21314633	21314715	+	XRN2	1	2	0	3	1	0	3	4	0.136667	YES
chr9	107571846	107573080	-	ABCA1	1	2	0	1	3	0	3	4	0	YES
chr1	169951239	169951842	-	KIFAP3	0	2	0	1	2	0	2	3	0	YES
chr10	35324225	35327847	-	CUL2	0	2	0	2	1	0	2	3	0	YES
chr10	111877181	111878344	+	ADD3	0	2	0	0	3	0	2	3	0	YES
chr10	116595401	116595882	+	FAM160B1	0	2	0	0	0	3	2	3	0.483333	YES
chr11	19251536	19251787	-	E2F8	0	2	0	0	3	0	2	3	0.56	YES
chr11	66616619	66616700	-	PC	0	2	0	3	0	0	2	3	0.75	YES
chr12	26628352	26629844	-	ITPR2	0	2	0	3	0	0	2	3	0	YES
chr12	112746696	112747364	-	C12orf51	0	2	0	3	0	0	2	3	0	YES
chr17	38318165	38318254	+	CASC3	0	2	0	0	3	0	2	3	-0.116667	YES
chr18	2796106	2796404	+	SMCHD1	0	2	0	0	3	0	2	3	0	YES
chr3	52582252	52584436	-	PBRM1	0	2	0	2	1	0	2	3	0.33	YES
chr3	108353820	108355462	+	DZIP3	0	2	0	0	3	0	2	3	0	YES
chr3	141900408	141901764	-	GK5	0	2	0	1	2	0	2	3	0	YES
chr5	52193360	52194068	+	ITGA1	0	2	0	0	3	0	2	3	0	YES
chr7	17915205	17915291	-	SNX13	0	2	0	0	3	0	2	3	0	YES
chr7	111381718	111382068	-	DOCK4	0	2	0	0	3	0	2	3	-1.11	YES
chr15	62205615	62207831	-	VPS13C	5	1	0	0	6	1	6	7	-0.776667	YES
chr21	34056430	34058057	-	SYNJ1	4	1	0	2	2	2	5	6	0.41	YES
chr11	107959387	107960218	+	CUL5	3	1	0	1	0	4	4	5	0	YES
chr14	31790887	31792770	-	HEATR5A	3	1	0	4	1	0	4	5	0.136667	YES
chr5	61745827	61747556	+	IPO11	3	1	0	0	5	0	4	5	0	YES
chr5	112418706	112419797	-	MCC	3	1	0	0	3	2	4	5	0	YES
chr6	123118114	123122454	+	SMPDL3A	3	1	0	1	2	2	4	5	3.66667	YES
chr1	2082418	2087433	+	PRKCZ	2	1	0	3	1	0	3	4	0	YES
chr10	124248518	124248937	+	HTRA1	2	1	0	1	3	0	3	4	-0.296667	YES
chr15	91557664	91560192	-	VPS33B	2	1	0	0	4	0	3	4	-0.516667	YES
chr19	45385622	45389193	+	PVRL2	2	1	0	1	2	1	3	4	-1.39667	YES
chr20	47282894	47292730	-	PREX1	2	1	0	1	3	0	3	4	0	YES
chr3	126348315	126349554	-	TXNRD3	2	1	0	3	0	1	3	4	-1.71333	YES
chr3	132390726	132390893	+	UBA5	2	1	0	0	1	3	3	4	-0.136667	YES
chr3	158320729	158322885	+	MLF1	2	1	0	3	0	1	3	4	-0.143333	YES
chr5	127607811	127609531	-	FBN2	2	1	0	2	2	0	3	4	0	YES
chr6	76542665	76545617	+	MYO6	2	1	0	0	3	1	3	4	0	YES
chr7	114303575	114304327	+	FOXP2	2	1	0	2	2	0	3	4	0	YES
chrX	128642074	128645780	-	SMARCA1	2	1	0	0	4	0	3	4	0	YES
chrX	152135783	152137925	+	ZNF185	2	1	0	1	3	0	3	4	-0.853333	YES
chr1	52255106	52255239	-	NRD1	1	1	0	3	0	0	2	3	-0.02	YES
chr10	79613296	79613984	-	DLG5	1	1	0	0	3	0	2	3	0	YES
chr12	124495989	124496092	+	ZNF664	1	1	0	3	0	0	2	3	0	YES
chr17	38557334	38559157	-	TOP2A	1	1	0	0	3	0	2	3	0.0733333	YES
chr2	27319670	27320370	+	KHK	1	1	0	0	3	0	2	3	0.38	YES
chr2	98412868	98413306	-	TMEM131	1	1	0	2	0	1	2	3	0	YES
chr2	201750496	201752335	-	PPIL3	1	1	0	0	3	0	2	3	0.25	YES
chr21	34116066	34117102	-	GCFC1	1	1	0	0	2	1	2	3	-0.56	YES
chr4	15539761	15542459	+	CC2D2A	1	1	0	2	1	0	2	3	4.18333	YES
chr4	85717906	85719148	-	WDFY3	1	1	0	1	2	0	2	3	1.22333	YES
chr4	123130493	123130972	+	KIAA1109	1	1	0	0	3	0	2	3	0	YES
chr5	118861719	118862827	+	HSD17B4	1	1	0	2	1	0	2	3	0	YES
chr6	24505214	24515394	+	ALDH5A1	1	1	0	3	0	0	2	3	0	YES
chr6	168344156	168344620	+	MLLT4	1	1	0	1	0	2	2	3	0	YES
chr9	114345870	114348277	-	PTGR1	1	1	0	2	0	1	2	3	0	YES
chr9	124081159	124083545	+	GSN	1	1	0	2	1	0	2	3	-0.963333	YES
chr1	27688359	27688581	-	MAP3K6	0	1	0	2	0	0	1	2	1.37333	YES
chr1	29602269	29605523	+	PTPRU	0	1	0	1	1	0	1	2	0.483333	YES
chr1	60299210	60301016	+	HOOK1	0	1	0	2	0	0	1	2	0	YES
chr1	115166265	115167799	-	DENND2C	0	1	0	0	0	2	1	2	0	YES
chr1	207640258	207641871	+	CR2	0	1	0	0	2	0	1	2	1.27333	YES
chr1	227261714	227261959	-	CDC42BPA	0	1	0	0	2	0	1	2	0	YES
chr1	229637850	229641786	-	NUP133	0	1	0	1	1	0	1	2	0	YES
chr10	35317816	35318415	-	CUL2	0	1	0	2	0	0	1	2	0	YES
chr10	101487321	101489309	-	COX15	0	1	0	0	2	0	1	2	0.56	YES
chr11	86152483	86153862	-	ME3	0	1	0	2	0	0	1	2	0.873333	YES
chr12	71078045	71078483	-	PTPRR	0	1	0	2	0	0	1	2	0	YES
chr12	88477732	88478362	-	CEP290	0	1	0	0	2	0	1	2	0	YES
chr12	104476680	104480624	+	HCFC2	0	1	0	0	2	0	1	2	0	YES
chr12	123054372	123055422	+	KNTC1	0	1	0	0	2	0	1	2	-0.216667	YES
chr13	26792744	26793593	-	RNF6	0	1	0	2	0	0	1	2	0.233333	YES
chr13	32921034	32928997	+	BRCA2	0	1	0	2	0	0	1	2	0	YES
chr13	43986190	43986980	-	ENOX1	0	1	0	0	2	0	1	2	0	YES
chr14	39621044	39623414	-	TRAPPC6B	0	1	0	2	0	0	1	2	-0.08	YES
chr15	52664561	52667500	-	MYO5A	0	1	0	0	2	0	1	2	0	YES
chr15	56981349	56981497	-	ZNF280D	0	1	0	0	0	2	1	2	-1.96	YES
chr16	23546682	23555834	-	EARS2	0	1	0	0	2	0	1	2	0	YES
chr16	47675002	47675509	+	PHKB	0	1	0	2	0	0	1	2	0	YES
chr16	67691757	67691888	-	ACD	0	1	0	0	1	1	1	2	-1.47	YES
chr17	26912234	26912336	-	SPAG5	0	1	0	2	0	0	1	2	-0.14	YES
chr17	27209047	27209135	-	FLOT2	0	1	0	2	0	0	1	2	-0.05	YES
chr17	41598248	41598736	+	DHX8	0	1	0	1	1	0	1	2	0.26	YES
chr17	42271780	42271884	-	ATXN7L3	0	1	0	0	2	0	1	2	-0.02	YES
chr17	48746890	48750331	+	ABCC3	0	1	0	1	0	1	1	2	3.08	YES
chr17	59955450	59958367	-	INTS2	0	1	0	0	2	0	1	2	0.546667	YES
chr19	4668658	4670172	-	C19orf10	0	1	0	0	0	2	1	2	-0.02	YES
chr19	10259694	10260128	-	DNMT1	0	1	0	0	0	2	1	2	0.22	YES
chr19	11446460	11447847	-	RAB3D	0	1	0	2	0	0	1	2	0	YES
chr2	39239490	39240600	-	SOS1	0	1	0	0	2	0	1	2	-0.19	YES
chr2	220161855	220161954	-	PTPRN	0	1	0	2	0	0	1	2	0.103333	YES
chr20	55748367	55749986	-	BMP7	0	1	0	0	0	2	1	2	0	YES
chr22	25581087	25586668	+	KIAA1671	0	1	0	0	2	0	1	2	0.47	YES
chr3	43607220	43616300	-	ANO10	0	1	0	1	1	0	1	2	-0.306667	YES
chr3	142116303	142119285	-	XRN1	0	1	0	0	2	0	1	2	0	YES
chr3	160968115	160968567	+	NMD3	0	1	0	2	0	0	1	2	-0.24	YES
chr4	4281258	4281368	-	LYAR	0	1	0	2	0	0	1	2	0	YES
chr4	85603624	85605095	-	WDFY3	0	1	0	1	1	0	1	2	-1.33333	YES
chr4	141300807	141302115	+	SCOC	0	1	0	0	1	1	1	2	-0.02	YES
chr4	144466001	144466622	+	SMARCA5	0	1	0	2	0	0	1	2	0.0566667	YES
chr5	68692374	68695875	+	RAD17	0	1	0	2	0	0	1	2	0	YES
chr5	96363519	96364105	+	LNPEP	0	1	0	0	2	0	1	2	0	YES
chr6	37451066	37452585	-	C6orf129	0	1	0	2	0	0	1	2	-1.21333	YES
chr6	76589838	76591405	+	MYO6	0	1	0	0	1	1	1	2	0	YES
chr7	26404256	26404666	+	SNX10	0	1	0	2	0	0	1	2	0	YES
chr7	86567531	86568123	-	KIAA1324L	0	1	0	2	0	0	1	2	0	YES
chr8	86050479	86050572	+	LRRCC1	0	1	0	0	2	0	1	2	-0.583333	YES
chr8	131179869	131181237	-	ASAP1	0	1	0	1	0	1	1	2	0	YES
chrX	38009148	38013714	-	SRPX	0	1	0	2	0	0	1	2	0	YES
chrX	46844342	46845113	+	PHF16	0	1	0	1	1	0	1	2	0	YES
chr2	172670008	172671630	-	SLC25A12	9	0	0	2	7	1	9	10	-0.38	YES
chr11	117266897	117267265	+	CEP164	5	0	0	2	1	3	5	6	0	YES
chr1	26314819	26315938	-	PAFAH2	4	0	0	5	0	0	4	5	0.43	YES
chr15	63930976	63932350	-	HERC1	4	0	0	3	2	0	4	5	0	YES
chr17	58539277	58539354	-	APPBP2	4	0	0	0	5	0	4	5	0.536667	YES
chr19	37656599	37660740	-	ZNF585A	4	0	0	4	1	0	4	5	0	YES
chr21	40650740	40652073	-	BRWD1	4	0	0	4	1	0	4	5	0	YES
chr8	17055161	17055889	+	ZDHHC2	4	0	0	3	2	0	4	5	0	YES
chrX	106065433	106066455	+	TBC1D8B	4	0	0	0	4	1	4	5	0.116667	YES
chr11	66589236	66590034	+	C11orf80	3	0	0	1	3	0	3	4	0	YES
chr14	24587744	24587958	+	DCAF11	3	0	0	4	0	0	3	4	-0.636667	YES
chr2	10928896	10929022	-	PDIA6	3	0	0	4	0	0	3	4	0.00666667	YES
chr9	136221813	136223123	-	SURF1	3	0	0	0	3	1	3	4	0.44	YES
chr1	65330656	65332548	-	JAK1	2	0	0	0	3	0	2	3	0	YES
chr1	227216952	227218108	-	CDC42BPA	2	0	0	2	1	0	2	3	0	YES
chr10	18823157	18825029	+	CACNB2	2	0	0	1	2	0	2	3	-0.19	YES
chr10	72635306	72636297	+	SGPL1	2	0	0	0	1	2	2	3	0	YES
chr11	31822405	31823108	-	PAX6	2	0	0	3	0	0	2	3	-1.69333	YES
chr11	43904739	43905532	+	ALKBH3	2	0	0	2	1	0	2	3	0	YES
chr11	107422639	107423833	-	ALKBH8	2	0	0	0	3	0	2	3	1.36667	YES
chr12	41410719	41414138	+	CNTN1	2	0	0	1	0	2	2	3	0	YES
chr12	44172106	44176109	+	IRAK4	2	0	0	3	0	0	2	3	0	YES
chr12	101504335	101505340	+	ANO4	2	0	0	1	2	0	2	3	0.756667	YES
chr12	111894061	111895017	-	ATXN2	2	0	0	2	1	0	2	3	0.03	YES
chr13	31860957	31891702	+	B3GALTL	2	0	0	3	0	0	2	3	0.0166667	YES
chr14	45590158	45590687	-	FKBP3	2	0	0	1	1	1	2	3	0	YES
chr15	66820251	66821189	+	ZWILCH	2	0	0	2	1	0	2	3	-0.146667	YES
chr15	73575453	73580653	+	NEO1	2	0	0	1	2	0	2	3	0	YES
chr15	77134273	77150149	-	SCAPER	2	0	0	1	2	0	2	3	0	YES
chr16	19505689	19508442	+	TMC5	2	0	0	0	3	0	2	3	-1.02667	YES
chr17	30519319	30520154	+	RHOT1	2	0	0	0	3	0	2	3	0	YES
chr18	43579501	43585434	-	PSTPIP2	2	0	0	0	1	2	2	3	0	YES
chr19	9017017	9017345	-	MUC16	2	0	0	0	0	3	2	3	0	YES
chr19	49852103	49854557	-	TEAD2	2	0	0	0	3	0	2	3	0.293333	YES
chr2	37247021	37247797	-	HEATR5B	2	0	0	0	3	0	2	3	-1.56333	YES
chr2	44028849	44031780	+	DYNC2LI1	2	0	0	0	1	2	2	3	0.35	YES
chr2	204356043	204359956	-	RAPH1	2	0	0	0	1	2	2	3	0	YES
chr21	37706017	37709171	+	MORC3	2	0	0	0	1	2	2	3	0	YES
chr21	45499586	45499895	+	TRAPPC10	2	0	0	0	1	2	2	3	0.37	YES
chr3	133375702	133376641	-	TOPBP1	2	0	0	0	1	2	2	3	-0.0166667	YES
chr4	56768705	56770508	+	EXOC1	2	0	0	3	0	0	2	3	0.123333	YES
chr5	55260141	55264103	-	IL6ST	2	0	0	0	2	1	2	3	0	YES
chr5	68668045	68669656	+	RAD17	2	0	0	3	0	0	2	3	0.8	YES
chr5	74677903	74680466	-	COL4A3BP	2	0	0	1	0	2	2	3	0	YES
chr5	77412059	77423853	-	AP3B1	2	0	0	0	3	0	2	3	-0.14	YES
chr5	127493857	127497351	+	SLC12A2	2	0	0	0	1	2	2	3	0	YES
chr6	119226994	119228566	+	ASF1A	2	0	0	1	2	0	2	3	-0.113333	YES
chr7	89854889	89856284	+	STEAP2	2	0	0	3	0	0	2	3	2.87	YES
chr7	129029041	129029474	+	AHCYL2	2	0	0	3	0	0	2	3	0	YES
chr8	38682887	38684685	+	TACC1	2	0	0	1	2	0	2	3	2.25333	YES
chr8	42256383	42257168	+	VDAC3	2	0	0	0	3	0	2	3	-0.00333333	YES
chr8	90982786	90983400	-	NBN	2	0	0	0	1	2	2	3	0	YES
chr9	135205887	135206438	-	SETX	2	0	0	2	0	1	2	3	0	YES
chrX	18275151	18276163	-	SCML2	2	0	0	0	0	3	2	3	0	YES
chrX	128599940	128602749	-	SMARCA1	2	0	0	0	3	0	2	3	0	YES
chr1	12638985	12639320	-	DHRS3	1	0	0	2	0	0	1	2	-1.13333	YES
chr1	35919291	35919962	-	KIAA0319L	1	0	0	0	2	0	1	2	0	YES
chr1	40535955	40536101	+	CAP1	1	0	0	1	1	0	1	2	3.46945e-18	YES
chr1	62321912	62327222	+	INADL	1	0	0	0	2	0	1	2	0	YES
chr1	65117994	65119440	+	CACHD1	1	0	0	0	2	0	1	2	0	YES
chr1	78407894	78408145	+	NEXN	1	0	0	2	0	0	1	2	0	YES
chr1	82445645	82447491	+	LPHN2	1	0	0	2	0	0	1	2	-0.563333	YES
chr1	87200375	87200761	+	SH3GLB1	1	0	0	0	2	0	1	2	0	YES
chr1	93312917	93316404	-	FAM69A	1	0	0	2	0	0	1	2	0.563333	YES
chr1	150919489	150921597	+	SETDB1	1	0	0	0	2	0	1	2	0	YES
chr1	151274444	151274669	-	PI4KB	1	0	0	0	0	2	1	2	-0.45	YES
chr1	204106378	204109162	-	ETNK2	1	0	0	0	2	0	1	2	0	YES
chr1	222903044	222903368	+	C1orf58	1	0	0	0	0	2	1	2	0.0666667	YES
chr1	223991155	223991875	-	TP53BP2	1	0	0	0	2	0	1	2	0	YES
chr10	13330542	13333830	-	PHYH	1	0	0	1	0	1	1	2	-0.426667	YES
chr10	74968545	74970008	+	FAM149B1	1	0	0	0	2	0	1	2	0	YES
chr10	74994699	74994950	+	FAM149B1	1	0	0	0	2	0	1	2	-0.803333	YES
chr10	114220342	114224305	+	VTI1A	1	0	0	0	2	0	1	2	0	YES
chr10	127525425	127526774	-	DHX32	1	0	0	0	2	0	1	2	0.86	YES
chr11	4130934	4132830	+	RRM1	1	0	0	1	1	0	1	2	0	YES
chr11	10050105	10051311	-	SBF2	1	0	0	0	2	0	1	2	0	YES
chr11	10781869	10783493	+	CTR9	1	0	0	0	2	0	1	2	0.00666667	YES
chr11	27397918	27398704	-	LGR4	1	0	0	0	2	0	1	2	0	YES
chr11	64567689	64567782	-	MAP4K2	1	0	0	2	0	0	1	2	-0.306667	YES
chr11	87025590	87029178	+	TMEM135	1	0	0	0	2	0	1	2	0.373333	YES
chr11	124747206	124747414	+	ROBO3	1	0	0	1	1	0	1	2	-0.403333	YES
chr11	129751404	129751621	-	NFRKB	1	0	0	2	0	0	1	2	0	YES
chr12	48060864	48061536	-	RPAP3	1	0	0	2	0	0	1	2	0	YES
chr12	57499123	57499250	-	STAT6	1	0	0	0	2	0	1	2	-0.186667	YES
chr12	64889385	64889478	+	TBK1	1	0	0	2	0	0	1	2	-0.06	YES
chr13	45578573	45580336	+	KIAA1704	1	0	0	0	1	1	1	2	0.483333	YES
chr13	96237165	96238259	-	DZIP1	1	0	0	0	2	0	1	2	0	YES
chr13	99461720	99462422	-	DOCK9	1	0	0	0	2	0	1	2	0	YES
chr13	111143688	111144416	+	COL4A2	1	0	0	0	2	0	1	2	0	YES
chr13	113740564	113741548	+	MCF2L	1	0	0	2	0	0	1	2	0.24	YES
chr14	67859145	67859378	-	PLEK2	1	0	0	0	0	2	1	2	0.466667	YES
chr14	74349142	74350803	+	PTGR2	1	0	0	1	0	1	1	2	-2.31333	YES
chr14	100364640	100367265	+	EML1	1	0	0	0	2	0	1	2	0	YES
chr14	102800984	102802025	+	ZNF839	1	0	0	0	2	0	1	2	12.4	YES
chr15	43708008	43708422	-	TP53BP1	1	0	0	0	2	0	1	2	0.92	YES
chr15	63447931	63448611	-	RPS27L	1	0	0	0	0	2	1	2	0	YES
chr15	63982847	63984609	-	HERC1	1	0	0	0	1	1	1	2	0	YES
chr15	64020038	64021434	-	HERC1	1	0	0	0	0	2	1	2	0	YES
chr15	65962264	65962350	-	DENND4A	1	0	0	0	2	0	1	2	-1.38333	YES
chr16	1872366	1872865	-	HAGH	1	0	0	1	1	0	1	2	0.01	YES
chr16	4945409	4945594	-	PPL	1	0	0	0	2	0	1	2	0.246667	YES
chr16	75642887	75646140	-	ADAT1	1	0	0	0	2	0	1	2	0	YES
chr17	19713752	19720061	-	ULK2	1	0	0	0	2	0	1	2	0	YES
chr17	29664899	29665042	+	NF1	1	0	0	0	2	0	1	2	0.27	YES
chr17	35800764	35802664	+	TADA2A	1	0	0	0	2	0	1	2	0	YES
chr17	61661074	61662572	+	DCAF7	1	0	0	0	2	0	1	2	-0.09	YES
chr18	21946931	21948250	-	OSBPL1A	1	0	0	2	0	0	1	2	0.32	YES
chr18	48446936	48447030	+	ME2	1	0	0	0	2	0	1	2	0	YES
chr18	52544970	52546599	+	RAB27B	1	0	0	0	1	1	1	2	0	YES
chr19	4355019	4355093	+	MPND	1	0	0	2	0	0	1	2	0.893333	YES
chr19	6829930	6832101	+	VAV1	1	0	0	0	2	0	1	2	-0.196667	YES
chr19	11217364	11218067	+	LDLR	1	0	0	0	2	0	1	2	0	YES
chr2	37319180	37319307	+	CCDC75	1	0	0	2	0	0	1	2	0	YES
chr2	42530370	42530454	+	EML4	1	0	0	2	0	0	1	2	-0.09	YES
chr2	46845978	46846765	+	CRIPT	1	0	0	2	0	0	1	2	0	YES
chr2	74086494	74087178	+	STAMBP	1	0	0	1	1	0	1	2	-0.16	YES
chr2	170917697	170917827	+	UBR3	1	0	0	0	1	1	1	2	0	YES
chr2	171862793	171862983	-	TLK1	1	0	0	2	0	0	1	2	0	YES
chr2	183616513	183616798	+	DNAJC10	1	0	0	2	0	0	1	2	0	YES
chr2	203620405	203621935	+	FAM117B	1	0	0	0	2	0	1	2	0	YES
chr2	208486642	208488952	-	FAM119A	1	0	0	0	0	2	1	2	0	YES
chr20	3581672	3584751	+	ATRN	1	0	0	1	0	1	1	2	0.48	YES
chr20	47589822	47591302	+	ARFGEF2	1	0	0	2	0	0	1	2	0.206667	YES
chr3	10264516	10268054	+	IRAK2	1	0	0	0	0	2	1	2	-2.15333	YES
chr3	25685276	25686790	-	TOP2B	1	0	0	1	1	0	1	2	0	YES
chr3	48615799	48615885	-	COL7A1	1	0	0	0	2	0	1	2	0.233333	YES
chr3	48623912	48623995	-	COL7A1	1	0	0	0	2	0	1	2	0	YES
chr3	52778322	52780076	-	NEK4	1	0	0	0	2	0	1	2	0	YES
chr3	63823739	63824047	-	THOC7	1	0	0	1	1	0	1	2	0	YES
chr3	107910491	107925474	-	IFT57	1	0	0	0	0	2	1	2	0	YES
chr3	137942374	137942477	+	ARMC8	1	0	0	2	0	0	1	2	0	YES
chr3	183439925	183442206	+	YEATS2	1	0	0	0	2	0	1	2	0	YES
chr4	3133125	3133364	+	HTT	1	0	0	0	0	2	1	2	0	YES
chr4	15559131	15560787	+	CC2D2A	1	0	0	0	2	0	1	2	0.63	YES
chr4	48563654	48564905	-	FRYL	1	0	0	0	0	2	1	2	0	YES
chr4	79792215	79793003	+	BMP2K	1	0	0	1	1	0	1	2	0	YES
chr4	123254965	123255498	+	KIAA1109	1	0	0	2	0	0	1	2	0.63	YES
chr5	1064368	1065397	-	SLC12A7	1	0	0	0	2	0	1	2	2.90667	YES
chr5	132062191	132069896	-	KIF3A	1	0	0	0	0	2	1	2	0	YES
[truncated: 127,271 more rows]

## Sheet: T7Aci
chr	intron_start	intron_end	strd	gene_name	reads_AciL	reads_AciS	reads_T7Aci	reads_ContL	reads_ContS	reads_T7ContL	reads_Aci	reads_Cont	delta_pir	reliable_delta_pir
chr17	4449238	4451252	-	MYBBP1A	86	20	245	4	9	1	351	14	0.84	YES
chr16	88803148	88803966	-	FAM38A	224	95	236	7	11	1	555	19	-2.36	YES
chr20	62317226	62318990	+	RTEL1	92	59	218	5	8	1	369	14	2.13333	YES
chr16	599839	601301	+	SOLH	20	19	214	7	17	0	253	24	-1.14	YES
chr9	139723937	139726172	+	C9orf86	73	42	209	7	8	1	324	16	-0.0833333	YES
chr20	60887837	60887943	-	LAMA5	168	126	205	6	8	0	499	14	-1.83667	YES
chr14	23531733	23532137	-	ACIN1	3	2	204	0	0	0	209	0	3.22	YES
chr7	5569295	5570154	-	ACTB	24	9	198	6	13	0	231	19	0.203333	YES
chr19	3186213	3192467	+	NCLN	18	9	196	12	8	1	223	21	0	YES
chr17	43351961	43362178	-	MAP3K14	76	46	191	14	13	0	313	27	-0.616667	YES
chr20	62575023	62575749	-	UCKL1	107	49	188	1	13	1	344	15	-8.43667	YES
chr9	35684548	35685060	-	TPM2	188	73	185	7	7	0	446	14	0.466667	YES
chr7	129945761	129946626	+	CPA4	475	321	182	32	41	0	978	73	0.776667	YES
chr20	60890264	60891003	-	LAMA5	76	56	173	9	21	1	305	31	-0.666667	YES
chr19	14520686	14521027	-	DDX39	96	54	172	6	4	1	322	11	0.633333	YES
chr18	46448281	46468850	-	SMAD7	45	39	172	23	52	1	256	76	-0.433333	YES
chr3	13384804	13393378	-	NUP210	117	86	169	45	35	0	372	80	-0.45	YES
chr21	46957923	46962281	-	SLC19A1	14	8	168	8	6	1	190	15	0.31	YES
chr8	144877701	144885552	-	SCRIB	31	14	167	22	21	0	212	43	-0.87	YES
chr11	68658864	68660357	-	MRPL21	18	12	165	8	4	1	195	13	-0.29	YES
chr8	145010183	145011146	-	PLEC	46	14	163	1	4	1	223	6	-1.55	YES
chr16	89662012	89662891	+	CPNE7	112	60	163	11	24	0	335	35	-13.5533	YES
chr16	89795727	89799709	+	ZNF276	74	33	163	19	17	0	270	36	-3.40333	YES
chr17	79414875	79418693	+	BAHCC1	26	20	161	6	12	1	207	19	25.5633	YES
chr20	60907774	60908145	-	LAMA5	123	90	161	11	8	0	374	19	-0.93	YES
chr17	4446461	4447783	-	MYBBP1A	19	21	159	1	8	0	199	9	0.19	YES
chr20	60900603	60901732	-	LAMA5	305	164	158	19	29	1	627	49	-1.21	YES
chr8	128751266	128752641	+	MYC	116	53	311	25	37	2	480	64	1.69667	YES
chr9	132502140	132510933	-	PTGES	71	55	152	14	36	0	278	50	-0.00333333	YES
chr9	140007949	140008316	-	DPP7	68	67	149	7	8	0	284	15	-3.51333	YES
chr20	60885368	60885474	-	LAMA5	120	82	148	8	3	0	350	11	12.4833	YES
chr19	2227127	2229783	+	DOT1L	30	31	148	8	6	0	209	14	0.99	YES
chr19	39208715	39212177	+	ACTN4	38	19	145	14	12	1	202	27	-0.143333	YES
chr20	30193617	30193855	+	ID1	39	24	145	3	3	0	208	6	1.53667	YES
chr16	56938375	56947175	+	SLC12A3	403	237	144	87	113	0	784	200	0.933333	YES
chr19	48640946	48643227	-	LIG1	111	82	144	16	12	0	337	28	0.583333	YES
chr7	156799334	156802353	-	MNX1	27	16	144	11	9	0	187	20	-0.74	YES
chr19	3980065	3980511	-	EEF2	60	31	140	7	4	1	231	12	-0.0933333	YES
chr1	204192714	204197210	-	PLEKHA6	42	24	140	19	20	0	206	39	0.686667	YES
chr20	60903502	60903899	-	LAMA5	677	384	549	30	40	4	1610	74	4.76667	YES
chr21	46596580	46600244	+	ADARB1	121	82	137	28	32	1	340	61	-1.25	YES
chr7	73123453	73133931	-	STX1A	20	9	136	8	17	1	165	26	0	NO
chr7	5569032	5569165	-	ACTB	11	13	136	5	3	0	160	8	0.0133333	YES
chrX	152991622	152994686	+	ABCD1	31	16	135	9	15	1	182	25	0.25	YES
chr7	43283532	43351361	+	HECW1	57	39	135	16	45	0	231	61	NA	NO
chr9	116299199	116345729	+	RGS3	45	35	131	13	44	1	211	58	-1.23333	YES
chr7	126746767	126882748	-	GRM8	0	4	130	0	1	0	134	1	NA	NO
chr5	133861977	133871547	+	PHF15	37	18	128	13	32	1	183	46	-2.52	NO
chr19	10822976	10823228	+	QTRT1	127	44	128	3	7	0	299	10	27.6433	YES
chr7	1522344	1523377	-	INTS1	66	14	128	1	8	0	208	9	2.59333	YES
chr19	10506020	10506110	-	CDC37	22	23	127	1	4	1	172	6	0.526667	YES
chr13	113490566	113496589	+	ATP11A	50	20	127	2	5	1	197	8	-0.0833333	YES
chr16	89180896	89187208	+	ACSF3	36	18	127	5	7	1	181	13	-0.806667	YES
chr19	3506473	3522953	+	FZR1	9	13	127	10	28	1	149	39	-0.223333	YES
chr8	145620767	145621562	-	CPSF1	52	44	127	0	4	0	223	4	3.66	YES
chr16	841371	841850	+	CHTF18	104	46	126	7	8	1	276	16	-0.603333	YES
chr16	88794070	88798113	-	FAM38A	69	39	126	22	24	1	234	47	-0.163333	YES
chr19	2245555	2246751	+	SF3A2	51	32	126	8	6	1	209	15	-0.586667	YES
chr8	145011411	145012318	-	PLEC	52	45	126	6	4	0	223	10	1.32667	YES
chr17	80047603	80048250	-	FASN	46	34	126	10	16	0	206	26	0.523333	YES
chr1	6270499	6270929	+	RNF207	100	50	125	2	7	1	275	10	-15.6033	YES
chr1	8934977	8938638	-	ENO1	40	41	125	21	47	1	206	69	0.00666667	YES
chr3	134076606	134077381	-	AMOTL2	16	7	125	9	1	1	148	11	4.10333	YES
chr11	69458015	69458599	+	CCND1	16	5	125	0	1	0	146	1	-0.476667	YES
chr7	102963080	102963149	-	DNAJC2	37	29	123	4	1	0	189	5	3.52667	YES
chr10	121156285	121182677	+	GRK5	29	28	123	13	25	0	180	38	-0.366667	YES
chr10	13900913	14372056	-	FRMD4A	2	0	123	1	3	0	125	4	NA	NO
chr20	2637865	2638574	+	NOP56	72	60	122	6	12	1	254	19	-1.29667	YES
chr5	92924151	92929267	+	NR2F1	62	42	122	31	47	0	226	78	0.716667	YES
chrX	153593855	153594391	-	FLNA	46	10	121	0	1	1	177	2	0.48	YES
chr19	1120023	1122137	-	SBNO2	48	19	120	9	3	0	187	12	0.276667	YES
chr1	110754800	110765585	+	KCNC4	13	4	119	4	1	1	136	6	1.52667	NO
chr19	1821682	1823570	-	REXO1	14	8	118	3	6	1	140	10	0.73	YES
chr19	1124022	1127602	-	SBNO2	22	11	117	5	8	1	150	14	0.183333	YES
chr17	4445187	4445758	-	MYBBP1A	27	9	117	2	1	1	153	4	2.04667	YES
chr11	67374548	67375866	+	NDUFV1	63	36	117	2	6	0	216	8	2.06333	YES
chr9	108275218	108296773	+	FSD1L	120	65	116	4	20	1	301	25	1.88333	NO
chr17	74085402	74087223	-	EXOC7	64	29	116	9	9	1	209	19	11.16	YES
chr19	13059628	13059894	+	RAD23A	55	28	116	3	6	0	199	9	0.693333	YES
chrX	153196301	153197523	-	NAA10	37	17	116	8	8	0	170	16	-0.696667	YES
chr21	46945873	46950683	-	SLC19A1	22	6	115	4	12	1	143	17	-0.41	YES
chr14	103986930	103987599	-	CKB	57	22	115	3	14	0	194	17	0.106667	YES
chr9	139836137	139836497	-	FBXW5	58	24	114	2	6	1	196	9	-3.36667	YES
chr18	8826231	8828905	+	KIAA0802	66	27	227	28	41	2	320	71	0	YES
chr1	44054672	44056642	+	PTPRF	20	19	113	8	7	1	152	16	-0.156667	YES
chr11	870500	883147	-	CHID1	24	20	112	14	18	1	156	33	-0.2	YES
chr11	68575107	68579904	-	CPT1A	64	45	112	8	23	0	221	31	-0.0533333	YES
chr17	4442271	4442733	-	MYBBP1A	22	10	111	5	9	1	143	15	1.84667	YES
chr13	102106452	102220049	+	ITGBL1	148	97	221	59	108	2	466	169	0	YES
chr20	60922085	60926759	-	LAMA5	236	130	552	66	71	5	918	142	-0.733333	YES
chr20	60908538	60908619	-	LAMA5	108	87	110	4	10	1	305	15	-0.826667	YES
chr1	153609130	153610770	+	C1orf77	107	72	110	24	38	1	289	63	1.43333	YES
chr17	40267054	40267740	-	KAT2A	52	33	110	5	2	0	195	7	0.13	YES
chr16	30077249	30078554	+	ALDOA	30	28	110	0	27	0	168	27	0.01	YES
chr12	3104159	3120169	+	TEAD4	11	14	110	7	13	0	135	20	0	YES
chr4	1309389	1316168	+	MAEA	52	39	218	7	12	2	309	21	-0.203333	YES
chr1	897428	897734	+	KLHL17	41	23	109	3	4	1	173	8	-7.16	YES
chr11	819906	821627	+	PNPLA2	28	22	109	6	7	1	159	14	1.41	YES
chr16	88098939	88105674	+	BANP	20	15	109	14	17	1	144	32	-0.696667	NO
chr5	179306790	179315102	-	TBC1D9B	25	12	109	2	8	1	146	11	2.53667	YES
chr17	2595392	2595654	-	KIAA0664	57	21	109	1	2	0	187	3	3.31	YES
chr2	211477018	211481146	+	CPS1	128	116	108	81	95	1	352	177	-0.0366667	YES
chr19	3982423	3982804	-	EEF2	45	19	108	2	9	1	172	12	-0.0133333	YES
chr9	130271411	130272424	-	FAM129B	50	25	108	1	7	0	183	8	-0.0833333	YES
chr1	981257	981343	+	AGRN	37	23	108	0	0	0	168	0	-1.58	YES
chr16	29819150	29819550	+	MAZ	15	15	108	7	5	0	138	12	-2.24	YES
chr16	692250	697416	+	FAM195A	44	28	214	5	23	2	286	30	-0.126667	YES
chr7	100271547	100273799	+	GNB2	20	22	107	14	7	1	149	22	0.886667	YES
chr1	6409927	6445553	-	ACOT7	20	8	107	14	16	1	135	31	NA	NO
chr14	93404872	93412675	-	ITPK1	20	6	107	5	7	0	133	12	-53.2567	NO
chr12	52567549	52574296	-	KRT80	43	28	106	7	15	1	177	23	-0.456667	YES
chr19	18871039	18876213	+	CRTC1	30	16	106	11	14	0	152	25	1.06333	YES
chr16	29811370	29814089	+	KIF22	43	43	105	5	15	1	191	21	1.04667	YES
chr20	48599679	48600360	+	SNAI1	1	2	105	0	3	1	108	4	1.23333	YES
chr21	45108122	45110168	+	RRP1B	20	11	105	3	12	0	136	15	0.476667	YES
chr16	88805145	88807885	-	FAM38A	63	51	209	22	19	2	323	43	-0.48	YES
chrX	64734854	64737866	-	LAS1L	20	22	104	8	14	1	146	23	-0.173333	YES
chr2	233128151	233164749	+	DIS3L2	37	19	104	19	16	1	160	36	0	YES
chr1	220978617	220986633	+	MOSC1	81	56	104	44	37	0	241	81	0.92	YES
chr1	156514265	156517864	-	IQGAP3	64	56	103	18	18	1	223	37	-0.23	YES
chr1	159890328	159895239	-	TAGLN2	17	15	103	4	12	1	135	17	0.0766667	YES
chr19	13216211	13216300	-	TRMT1	39	38	103	0	3	0	180	3	-0.823333	YES
chr7	128493086	128493522	+	FLNC	51	16	103	0	4	0	170	4	0.17	YES
chr7	720364	750965	-	PRKAR1B	20	12	103	10	13	0	135	23	-0.09	YES
chr9	117170299	117185593	-	DFNB31	34	19	102	14	17	1	155	32	-3.48	YES
chr21	44840338	44840889	-	SIK1	38	24	102	10	8	0	164	18	-0.66	YES
chr19	10919257	10922939	+	DNM2	41	23	102	13	11	0	166	24	0.04	YES
chr14	105181194	105181620	+	INF2	39	23	101	3	6	1	163	10	0.74	YES
chr8	145533583	145534859	+	HSF1	48	22	101	6	1	1	171	8	0.576667	YES
chr22	19493005	19494908	+	CDC45	31	19	101	8	9	1	151	18	0.203333	YES
chr7	44805179	44805762	+	ZMIZ2	113	34	101	3	8	0	248	11	46.45	YES
chr5	138609851	138611809	+	MATR3	21	32	100	11	18	0	153	29	1.88667	YES
chr7	1533548	1534451	-	INTS1	52	17	100	5	5	0	169	10	0.506667	YES
chr20	60910326	60911395	-	LAMA5	142	144	199	34	39	2	485	75	-0.196667	YES
chr16	2809663	2810301	+	SRRM2	222	109	199	15	28	2	530	45	-6.00333	YES
chr21	35186377	35190570	+	ITSN1	43	35	99	13	23	1	177	37	0.203333	YES
chr22	18310548	18314619	-	MICAL3	37	22	99	18	14	1	158	33	6.06	NO
chr19	3984349	3985375	-	EEF2	16	8	99	7	4	1	123	12	-0.00333333	YES
chr16	840667	841160	+	CHTF18	72	35	98	4	2	1	205	7	-4.09	YES
chr14	102515007	102515776	+	DYNC1H1	131	76	98	8	5	0	305	13	0.936667	YES
chr7	142985623	142988632	+	CASP2	69	63	98	25	32	0	230	57	-0.946667	YES
chr18	8784842	8785933	+	KIAA0802	54	17	98	16	8	0	169	24	-0.233333	YES
chr19	5690612	5691329	+	RPL36	20	9	98	5	7	0	127	12	-0.00333333	YES
chr11	68696826	68700766	+	IGHMBP2	53	32	195	9	16	2	280	27	16.9567	YES
chr9	127101945	127109987	+	NEK6	26	9	97	3	2	1	132	6	-0.713333	YES
chr16	844202	845131	+	CHTF18	29	23	97	3	2	0	149	5	-1.06	YES
chr9	136215102	136215776	+	RPL7A	15	6	97	3	2	0	118	5	-0.0533333	YES
chr15	67008837	67073334	+	SMAD6	167	115	578	113	163	6	860	282	0.113333	YES
chr22	50181143	50187681	-	BRD1	50	38	96	20	22	1	184	43	13.4733	NO
chr19	18968343	18971129	+	UPF1	30	20	96	0	2	1	146	3	-0.346667	YES
chr3	45978036	45996740	-	FYCO1	36	14	96	6	13	1	146	20	0.69	YES
chr8	38775589	38793511	+	PLEKHA2	50	38	96	24	42	0	184	66	-0.0566667	YES
chr21	44839359	44839738	-	SIK1	86	20	96	12	18	0	202	30	-0.28	YES
chr5	179300249	179301901	-	TBC1D9B	21	9	96	2	5	0	126	7	-0.153333	YES
chr20	60891115	60891726	-	LAMA5	408	235	381	25	20	4	1024	49	-1.09	YES
chr17	45235670	45247282	-	CDC27	39	30	95	15	27	1	164	43	0.0466667	YES
chr19	15508667	15510112	-	AKAP8L	25	20	95	4	4	1	140	9	0.203333	YES
chr6	33638593	33638941	+	ITPR3	50	29	95	0	0	0	174	0	-1.67333	YES
chr12	132627424	132628239	-	DDX51	16	9	95	4	3	0	120	7	-0.84	YES
chr9	140006683	140007196	-	DPP7	169	109	378	11	8	4	656	23	-5.75	YES
chr10	134041633	134059403	-	STK32C	43	18	377	16	31	4	438	51	2.60333	YES
chr20	34785964	34797409	+	EPB41L1	37	27	94	10	16	1	158	27	-0.456667	YES
chr20	62371885	62372722	+	SLC2A4RG	21	7	94	7	7	1	122	15	-0.03	YES
chr4	1730515	1732613	+	TACC3	34	37	94	4	7	0	165	11	2.04	YES
chr20	62319959	62320407	+	RTEL1	34	30	94	2	5	0	158	7	0.96	YES
chr17	4444860	4445078	-	MYBBP1A	13	1	94	0	0	0	108	0	3.36667	YES
chr5	133909453	133914186	+	PHF15	28	32	93	9	9	1	153	19	-3.27667	NO
chr1	228540764	228550276	+	OBSCN	32	28	93	12	11	1	153	24	NA	NO
chr7	44606124	44607716	-	DDX56	32	23	93	3	21	1	148	25	-0.463333	YES
chr16	31191549	31193718	+	FUS	15	18	93	20	25	1	126	46	0.163333	YES
chr19	56171588	56171881	+	U2AF2	24	19	93	2	1	0	136	3	3.38333	YES
chr19	19760750	19762497	-	ATP13A1	41	18	93	5	5	0	152	10	-1.33	YES
chr19	12831805	12834062	-	TNPO2	28	18	93	12	12	0	139	24	1.23333	YES
chr13	95900008	95953494	-	ABCC4	23	17	93	12	13	0	133	25	2.30333	YES
chr2	43452892	43453403	-	ZFP36L2	8	5	93	4	3	0	106	7	-2.15333	YES
chr7	126544738	126746549	-	GRM8	1	0	93	2	2	0	94	4	NA	NO
chr12	6644028	6645659	+	GAPDH	57	26	277	20	30	3	360	53	0.0166667	YES
chr8	642613	665860	-	ERICH1	60	21	184	5	5	2	265	12	0.906667	YES
chr19	18418366	18420487	-	LSM4	27	11	92	15	6	0	130	21	-0.21	YES
chr1	110163889	110167924	+	AMPD2	35	30	182	13	13	2	247	28	3.56	YES
chr20	33891873	33894468	-	UQCC	43	25	91	5	16	1	159	22	3.16667	YES
chr5	149759296	149763300	+	TCOF1	7	4	91	4	3	1	102	8	5.35	YES
chr17	74902270	74921047	+	MGAT5B	40	40	91	15	38	0	171	53	1.26	YES
chr19	648976	649678	-	RNF126	25	15	91	0	4	0	131	4	-1.24333	YES
chr12	125398321	125399132	-	UBC	12	4	91	3	3	0	107	6	0.22	YES
chr16	87866632	87868019	-	SLC7A5	163	96	361	34	23	4	620	61	0.393333	YES
chr17	43198740	43209614	-	PLCD3	46	26	180	24	36	2	252	62	-0.59	YES
chr22	50945465	50946010	-	LMF2	67	52	90	0	11	1	209	12	15.8033	YES
chr21	33840157	33867336	+	C21orf63	38	24	90	43	36	1	152	80	-0.09	YES
chr18	11981765	11999052	+	IMPA2	41	21	90	27	27	1	152	55	-0.05	YES
chr10	24822167	24833909	+	KIAA1217	43	11	90	4	11	1	144	16	0	NO
chr17	2594072	2594902	-	KIAA0664	28	9	90	5	4	1	127	10	2.43667	YES
chr1	44003949	44010701	+	PTPRF	12	4	90	4	3	1	106	8	0	YES
chr1	861394	865534	+	SAMD11	67	67	90	33	49	0	224	82	-3.67667	YES
chr8	145009482	145010015	-	PLEC	27	13	90	0	3	0	130	3	-0.183333	YES
chr5	1467006	1470940	-	LPCAT1	48	29	267	10	13	3	344	26	-0.386667	YES
chr2	240037007	240048151	-	HDAC4	56	31	89	12	21	1	176	34	0	NO
chr1	3418486	3421771	-	MEGF6	22	18	89	8	30	1	129	39	-0.886667	YES
chr19	507845	518888	+	C19orf20	11	8	89	2	4	1	108	7	-0.473333	YES
chr1	118148776	118165463	+	FAM46C	1	3	89	2	2	1	93	5	-6.73333	NO
chr12	56137546	56142369	+	GDF11	12	19	89	12	12	0	120	24	-0.746667	YES
chr20	62572562	62575005	-	UCKL1	80	25	177	10	22	2	282	34	-3.86667	YES
chr4	89726204	89772170	-	FAM13A	53	45	88	36	44	1	186	81	-0.0166667	NO
chr5	167826573	167833202	+	WWC1	33	24	88	17	13	1	145	31	0	YES
chr14	105959072	105963693	+	C14orf80	23	21	88	8	8	1	132	17	-8.40667	NO
chr3	49028348	49038870	+	P4HTM	38	18	88	17	32	1	144	50	-1.67	YES
chr17	36861995	36863202	+	MLLT6	20	14	88	4	9	1	122	14	-0.04	YES
chr9	139274317	139275191	-	SNAPC4	11	12	88	0	2	1	111	3	-3.29333	YES
chr1	1424655	1425636	+	ATAD3B	20	10	88	0	2	1	118	3	1.14667	YES
chr7	107642179	107643293	-	LAMB1	28	7	88	9	8	1	123	18	-0.936667	YES
chr10	103919782	103919989	+	NOLC1	34	24	88	3	1	0	146	4	1.34	YES
chr7	101091069	101176362	+	EMID2	27	23	88	13	28	0	138	41	0	YES
chr7	100479035	100479279	+	SRRT	122	51	87	3	5	1	260	9	3.97	YES
chr1	153906348	153906610	-	DENND4B	59	44	87	0	0	0	190	0	3.26333	YES
chr1	155238584	155239278	-	CLK2	74	29	87	0	8	0	190	8	-10.5867	YES
chr3	134080650	134084658	-	AMOTL2	30	27	86	10	11	1	143	22	-0.24	YES
chr20	60879634	60881252	+	ADRM1	19	13	86	1	11	1	118	13	-0.25	YES
chr20	60971649	60981970	-	CABLES2	21	7	86	22	12	1	114	35	-2.74333	YES
chr7	1588325	1589489	-	TMEM184A	77	52	86	3	5	0	215	8	-6.07667	YES
chr11	65388438	65389715	+	PCNXL3	31	31	86	7	3	0	148	10	4.20333	YES
chr22	24567964	24572078	+	CABIN1	12	21	86	10	3	0	119	13	0.833333	YES
chr9	139918689	139922526	-	ABCA2	17	17	86	19	6	0	120	25	-1.63	YES
chr16	719607	720122	+	RHOT2	42	12	86	2	5	0	140	7	-4.14333	YES
chr1	204230577	204234069	-	PLEKHA6	30	9	86	6	9	0	125	15	-5.75333	YES
chr21	44836998	44837422	-	SIK1	25	9	86	10	9	0	120	19	1.27667	YES
chr19	3981451	3981944	-	EEF2	28	8	86	1	1	0	122	2	-0.0133333	YES
chr5	179050166	179050636	-	HNRNPH1	12	2	86	4	8	0	100	12	-5.15	YES
chr17	80051648	80053195	-	FASN	107	49	171	4	11	2	327	17	0.473333	YES
chr19	42392937	42396095	+	ARHGEF1	51	32	85	5	7	1	168	13	-0.4	YES
chr11	6498499	6498947	-	ARFIP2	50	31	85	2	4	0	166	6	4.66667	YES
chr14	105622327	105624042	-	JAG2	21	21	85	2	6	0	127	8	-1.4	YES
chr7	1523807	1524733	-	INTS1	39	17	85	3	2	0	141	5	0.806667	YES
chr8	145722837	145724152	+	PPP1R16A	41	15	85	5	7	0	141	12	0.17	YES
chr16	705890	706301	+	WDR90	88	55	168	6	3	2	311	11	18.75	YES
chr7	116139986	116146024	+	CAV2	52	36	168	24	27	2	256	53	1.00667	NO
chr20	60927417	60928189	-	LAMA5	57	42	84	10	13	1	183	24	0.133333	YES
chr7	148703146	148705250	-	PDIA4	39	14	84	6	17	1	137	24	-0.43	YES
chr1	25233909	25245730	-	RUNX3	10	12	84	5	15	1	106	21	0.456667	YES
chr9	127115989	127119042	-	PSMB7	23	10	84	5	7	1	117	13	0.4	YES
chr1	249151697	249152026	-	ZNF692	66	60	84	6	7	0	210	13	-11.5	YES
chr2	240016753	240024471	-	HDAC4	30	21	84	12	36	0	135	48	-0.33	YES
chr11	460289	473894	+	PTDSS2	14	9	84	2	15	0	107	17	-1.62667	YES
chr20	42747264	42788257	-	JPH2	6	2	84	6	6	0	92	12	0	NO
chr18	8821497	8824696	+	KIAA0802	130	57	167	28	59	2	354	89	-0.65	YES
chr7	99696827	99696901	-	MCM7	97	48	83	2	5	1	228	8	-0.55	YES
chr22	50724717	50725539	-	PLXNB2	51	14	83	7	5	1	148	13	-0.3	YES
chr13	111299587	111303380	-	CARS2	49	28	83	10	16	0	160	26	-0.893333	YES
chr19	50919084	50919652	+	POLD1	41	17	83	0	5	0	141	5	-2.18	YES
chr19	6214050	6216415	-	MLLT1	22	7	83	4	7	0	112	11	-0.00666667	YES
chr1	86046731	86047047	+	CYR61	7	7	83	1	0	0	97	1	2.55	YES
chr17	38279014	38279537	+	MSL1	27	4	83	8	8	0	114	16	1.21	YES
chr10	72238816	72285678	+	KIAA1274	30	27	248	17	47	3	305	67	1.77333	NO
chr1	6271179	6271926	+	RNF207	64	30	165	5	12	2	259	19	-13.2333	YES
chr11	71718482	71719733	-	NUMA1	105	60	82	7	9	1	247	17	-0.266667	YES
chr1	11994913	12008032	+	PLOD1	15	15	82	13	12	1	112	26	-0.07	YES
chr16	2079784	2086324	+	SLC9A3R2	20	13	82	6	15	1	115	22	2.32333	YES
chr16	2338331	2339434	-	ABCA3	47	12	82	0	5	1	141	6	-0.59	YES
chr17	18882987	18891559	-	FAM83G	4	5	82	4	4	1	91	9	6.31667	YES
chr20	32247810	32248064	-	NECAB3	85	54	82	2	7	0	221	9	-2.61667	YES
chr15	69745360	69747508	+	RPLP1	31	38	82	8	12	0	151	20	-11.4367	YES
chr1	156566271	156567826	-	GPATCH4	31	35	82	3	4	0	148	7	-0.34	YES
chr3	14177409	14180679	+	TMEM43	21	21	82	8	14	0	124	22	0.143333	YES
chr3	134086646	134089541	-	AMOTL2	22	15	82	6	8	0	119	14	-0.143333	YES
chr5	177027262	177031179	+	B4GALT7	28	14	82	11	12	0	124	23	-3.44333	YES
chr17	80016695	80017823	-	DUS1L	30	9	82	3	3	0	121	6	0.446667	YES
chr11	118779365	118780622	-	BCL9L	14	9	82	14	10	0	105	24	1.00333	YES
chr21	33720121	33721612	-	URB1	27	8	82	3	5	0	117	8	0.356667	YES
chr12	57499383	57499973	-	STAT6	60	39	81	1	3	1	180	5	8.39333	YES
chr17	80016293	80016656	-	DUS1L	40	33	81	4	3	1	154	8	1.06667	YES
chr7	150733737	150737354	+	ABCB8	49	32	81	9	22	1	162	32	1.20333	YES
chr16	89960267	89961445	+	TCF25	48	31	81	4	8	1	160	13	0.0233333	YES
chr8	22054934	22059315	+	BMP1	40	28	81	18	11	1	149	30	1.6	YES
chrX	153595219	153595764	-	FLNA	36	25	81	1	0	1	142	2	0.113333	YES
chr16	707222	707761	+	WDR90	40	20	81	1	2	1	141	4	15.6767	YES
chr10	99130839	99131829	-	RRP12	30	19	81	1	2	1	130	4	1.52	YES
chr16	2131800	2133695	+	TSC2	32	16	81	0	7	1	129	8	6.97333	YES
chr20	48600889	48604408	+	SNAI1	7	5	81	2	5	1	93	8	1.74667	YES
chr17	80847574	80851422	+	TBCD	31	17	81	0	6	0	129	6	-0.33	YES
chr8	144875254	144876069	-	SCRIB	24	17	81	2	5	0	122	7	0.133333	YES
chr22	41645822	41647010	-	RANGAP1	42	16	81	6	14	0	139	20	-0.186667	YES
chr20	62312073	62316875	+	RTEL1	43	32	242	8	14	3	317	25	2.21667	YES
chrX	153579410	153579948	-	FLNA	96	47	161	6	10	2	304	18	8.12	YES
chr16	4312703	4322658	-	TFAP4	29	13	161	15	15	2	203	32	-0.333333	YES
chr7	150765142	150767033	+	SLC4A2	44	32	80	3	6	1	156	10	-0.106667	YES
chr17	7125401	7125495	+	ACADVL	81	30	80	0	4	1	191	5	0.423333	YES
chr8	145668190	145668520	-	NFKBIL2	43	14	80	1	2	1	137	4	-3.07333	YES
chr17	79679550	79681982	+	SLC25A10	15	12	80	2	4	1	107	7	0.406667	YES
chr19	49494741	49496251	-	GYS1	24	6	80	8	15	1	110	24	0.576667	YES
chr14	105931521	105932762	+	MTA1	19	6	80	4	6	1	105	11	-2.58333	YES
chr17	77809512	77811635	-	CBX4	26	5	80	10	10	1	111	21	1.02	YES
chr16	703804	705028	+	WDR90	86	50	80	9	16	0	216	25	34.9867	YES
chr12	6780005	6782381	-	ZNF384	47	17	80	5	3	0	144	8	-1.41667	YES
chr19	15536580	15537792	-	WIZ	20	17	80	3	9	0	117	12	0.823333	YES
chr8	128748870	128750493	+	MYC	77	33	558	17	33	7	668	57	2.66667	YES
chr12	125302254	125348140	-	SCARB1	50	29	237	32	50	3	316	85	-0.05	YES
chr14	23447655	23450469	-	JUB	14	29	79	1	19	1	122	21	0.37	YES
chr19	8032675	8038608	-	ELAVL1	20	26	79	3	12	1	125	16	0.05	YES
chr19	11559107	11559354	+	PRKCSH	51	15	79	1	1	1	145	3	-1.54667	YES
chr12	132575489	132593116	+	EP400NL	31	14	79	8	13	1	124	22	NA	NO
chr9	139744590	139745206	+	PHPT1	41	12	79	0	4	1	132	5	-0.953333	YES
chr1	44072130	44072484	+	PTPRF	32	11	79	3	2	1	122	6	0.516667	YES
chr9	136199597	136200553	-	SURF6	17	11	79	3	7	1	107	11	1.14	YES
chr21	45163689	45165959	+	PDXK	45	40	79	11	12	0	164	23	-0.0166667	YES
chr1	1686916	1687696	-	NADK	42	33	79	5	6	0	154	11	3.09333	YES
chr19	13049585	13049947	+	CALR	14	7	79	0	5	0	100	5	0.303333	YES
chr17	79479387	79479759	-	ACTG1	26	18	157	2	12	2	201	16	0.34	YES
chr3	48628250	48628896	-	COL7A1	60	24	78	3	4	1	162	8	1.17667	YES
chr17	2808663	2861052	+	RAP1GAP2	15	24	78	21	23	1	117	45	0	NO
chr5	179298531	179299891	-	TBC1D9B	72	41	78	2	3	0	191	5	0.413333	YES
chr22	41997195	41999262	-	PPPDE2	43	27	78	8	8	0	148	16	-0.776667	YES
chr1	3703875	3712425	-	LRRC47	14	14	78	4	2	0	106	6	-0.02	YES
chr16	28109961	28112778	-	XPO6	84	66	155	13	11	2	305	26	2.98667	YES
chr4	1742714	1746244	+	TACC3	20	14	77	4	10	1	111	15	0.0166667	YES
chr11	47204621	47207899	-	PACSIN3	13	14	77	4	6	1	104	11	-0.27	YES
chr19	45864901	45867000	-	ERCC2	18	18	77	1	5	0	113	6	-3.50667	YES
chr9	100965691	100970949	-	TBC1D2	16	17	77	3	5	0	110	8	0.1	YES
chr11	68115712	68125117	+	LRP5	13	13	77	11	6	0	103	17	0.0333333	YES
chr12	56498610	56500371	+	PA2G4	11	11	77	4	7	0	99	11	-0.07	YES
chr17	79827834	79828511	-	ARHGDIA	13	5	77	6	5	0	95	11	15.4467	YES
chr19	1014473	1020770	-	C19orf6	17	13	230	15	25	3	260	43	-0.193333	YES
chr12	120653077	120659425	-	PXN	189	98	536	29	49	7	823	85	-0.32	YES
chr6	33652721	33653135	+	ITPR3	150	56	228	2	1	3	434	6	2.97	YES
chr7	131193788	131194123	-	PODXL	47	47	76	3	9	1	170	13	3.34333	YES
chr3	50326369	50326685	-	IFRD2	31	27	76	1	1	1	134	3	0.0233333	YES
chr1	230410311	230415048	+	GALNT2	39	16	76	13	25	1	131	39	-0.0466667	YES
chr22	50695623	50696671	-	MAPK12	40	14	76	6	7	1	130	14	-5.28667	YES
chr16	339608	343487	-	AXIN1	11	9	76	0	8	1	96	9	0.606667	YES
chr16	84213951	84214648	-	TAF1C	37	17	76	4	5	0	130	9	12.21	YES
chr10	17271985	17272648	+	VIM	16	5	76	1	3	0	97	4	-0.02	YES
chr20	62129188	62130410	-	EEF1A2	8	5	76	5	9	0	89	14	0.226667	YES
chr16	88783620	88785981	-	FAM38A	396	291	379	12	17	5	1066	34	5.92	YES
chr5	137801758	137802445	+	EGR1	0	0	151	0	0	2	151	2	0.793333	YES
chr5	640720	644413	+	CEP72	78	34	301	19	20	4	413	43	17.4533	YES
chr7	5633400	5642887	+	FSCN1	34	24	301	13	35	4	359	52	0.00666667	YES
chr19	18963106	18963795	+	UPF1	39	19	75	2	5	1	133	8	-1.05	YES
chr19	39217744	39218585	+	ACTN4	69	17	75	3	6	1	161	10	0.21	YES
chr8	144672252	144672777	-	EEF1D	15	15	75	4	8	1	105	13	-6.53667	NO
chr19	18420672	18423413	-	LSM4	9	6	75	3	11	1	90	15	-0.01	YES
chr2	241398606	241401607	+	GPC1	27	4	75	12	6	1	106	19	-0.0333333	YES
chr11	66136143	66136530	-	SLC29A2	29	23	75	5	1	0	127	6	6.14667	YES
chr22	18305827	18310409	-	MICAL3	43	21	75	17	21	0	139	38	-8.33333	NO
chr20	2637196	2637419	+	NOP56	28	18	75	2	3	0	121	5	-0.596667	YES
chr9	127089725	127101849	+	NEK6	22	15	75	8	6	0	112	14	0.333333	YES
chr8	145743426	145744998	+	LRRC14	15	11	75	6	6	0	101	12	-10.3233	NO
chr2	38298454	38301488	-	CYP1B1	16	10	75	2	3	0	101	5	-0.32	YES
chr8	145000053	145000951	-	PLEC	64	46	298	5	11	4	408	20	-0.91	YES
chr19	46321405	46324641	-	SYMPK	70	24	148	8	18	2	242	28	-1.43	YES
chr9	117008191	117012894	+	COL27A1	23	22	148	5	9	2	193	16	32.1633	NO
chr17	40063826	40065241	-	ACLY	77	37	74	7	17	1	188	25	-0.11	YES
chr20	30137136	30137866	+	HM13	69	22	74	5	8	1	165	14	0.22	YES
chr6	33669198	33679325	-	C6orf125	35	20	74	14	27	1	129	42	0.0266667	YES
chr1	1274034	1274741	-	DVL1	22	15	74	1	3	1	111	5	-6.04333	YES
chr2	153476233	153481951	+	FMNL2	31	14	74	7	16	1	119	24	-0.19	YES
chr22	19748804	19750763	+	TBX1	21	7	74	6	16	1	102	23	0.963333	YES
chr1	156531794	156532378	-	IQGAP3	79	61	74	13	8	0	214	21	-4.47667	YES
chr9	140161799	140166532	+	COBRA1	28	18	74	8	2	0	120	10	-0.183333	YES
chr12	6669493	6669612	-	NOP2	39	12	74	1	1	0	125	2	0.343333	YES
chr20	62298907	62303908	+	RTEL1	35	12	74	11	8	0	121	19	-0.12	YES
chr16	814144	814646	+	MSLN	34	12	74	1	8	0	120	9	-1.96667	YES
chr14	99983521	99988469	-	CCDC85C	15	11	74	6	15	0	100	21	0.49	YES
chr19	18879604	18882251	+	CRTC1	14	7	74	6	15	0	95	21	-17.5267	YES
chr11	69458760	69462761	+	CCND1	90	52	736	38	44	10	878	92	-0.84	YES
chr1	3425810	3426433	-	MEGF6	77	77	73	11	9	1	227	21	-5.83333	YES
chr12	110783188	110783805	+	ATP2A2	58	48	73	2	6	1	179	9	-0.28	YES
chr7	148718240	148725412	-	PDIA4	38	9	73	11	22	1	120	34	0.04	YES
chr1	6409927	6420629	-	ACOT7	4	7	73	8	12	1	84	21	NA	NO
chr17	80007883	80008277	-	RFNG	73	50	73	0	6	0	196	6	0.233333	YES
chr22	19486675	19492884	+	CDC45	30	20	73	1	5	0	123	6	-0.07	YES
chr22	46749765	46751340	+	TRMU	23	10	73	2	2	0	106	4	0.623333	YES
chr16	28177907	28181070	-	XPO6	89	85	145	12	25	2	319	39	-0.486667	YES
chr16	89759876	89760580	+	CDK10	60	33	144	9	4	2	237	15	7.71667	YES
chr11	377328	379417	+	B4GALNT4	47	30	144	8	14	2	221	24	-1.83333	YES
chr1	2305997	2316416	-	MORN1	52	27	144	17	13	2	223	32	4.38	NO
chr17	53158545	53218670	+	STXBP4	19	22	72	4	26	1	113	31	0.183333	NO
chr2	242435950	242437030	-	STK25	26	21	72	2	12	1	119	15	-0.0166667	YES
chr16	89651266	89651871	+	CPNE7	25	17	72	4	0	1	114	5	-1.61667	YES
chr3	122873889	122880167	+	PDIA5	15	13	72	5	8	1	100	14	-0.326667	YES
chr22	19776484	19789523	-	GNB1L	10	9	72	4	5	1	91	10	-0.396667	YES
chr3	48608712	48609433	-	COL7A1	85	59	72	4	3	0	216	7	19.1467	YES
chr9	139750602	139751161	+	MAMDC4	46	34	72	1	6	0	152	7	0	YES
chr1	6270031	6270282	+	RNF207	33	19	72	2	0	0	124	2	-5.69	YES
chr19	5894866	5896463	-	NDUFA11	31	19	72	4	3	0	122	7	-0.38	YES
chr20	60575778	60578215	-	TAF4	17	19	72	5	1	0	108	6	0.01	YES
chr10	79793663	79795109	+	RPS24	14	17	72	3	7	0	103	10	0.0266667	YES
chr17	27074283	27074860	+	TRAF4	30	16	72	4	4	0	118	8	-3.06	YES
chr16	730685	731151	+	STUB1	42	13	72	4	1	0	127	5	0.763333	YES
chr10	71899898	71905176	-	TYSND1	22	13	72	3	7	0	107	10	-5.70333	NO
chr16	1556331	1556952	+	TELO2	31	11	72	3	4	0	114	7	-6.03333	YES
chr20	62122089	62124489	-	EEF1A2	10	10	72	3	1	0	92	4	-0.05	YES
chr12	133148111	133148873	+	FBRSL1	12	9	72	1	2	0	93	3	10.15	YES
chr3	87027953	87039767	-	VGLL3	49	29	71	15	31	1	149	47	-0.266667	YES
chr16	67863992	67864292	-	CENPT	76	20	71	3	3	1	167	7	2.06667	YES
chr1	2332375	2333645	+	RER1	17	18	71	0	9	1	106	10	0.916667	YES
chr17	78858949	78865519	+	RPTOR	25	13	71	2	13	1	109	16	-2.57333	YES
chr12	124812180	124815390	-	NCOR2	32	12	71	11	12	1	115	24	-0.06	YES
chr19	6216525	6217964	-	MLLT1	6	4	71	0	6	1	81	7	1.36	YES
chr1	155238151	155238498	-	CLK2	111	61	71	6	10	0	243	16	-0.593333	YES
chr12	6495611	6497563	+	LTBR	29	21	71	11	12	0	121	23	-0.756667	YES
chr19	2808443	2810301	+	THOP1	28	18	71	0	3	0	117	3	-0.466667	YES
chr16	3716120	3721722	-	TRAP1	24	15	71	12	6	0	110	18	0.0366667	YES
chr11	71711604	71712829	+	IL18BP	28	14	71	3	1	0	113	4	0	NO
chr16	626255	628378	+	PIGQ	33	12	71	8	11	0	116	19	4.7	YES
chr19	10400802	10401747	+	ICAM5	20	7	71	0	5	0	98	5	-1.53333	YES
chr16	718700	719552	+	RHOT2	11	7	71	1	1	0	89	2	-0.486667	YES
chr17	7140980	7142564	-	PHF23	11	3	71	1	10	0	85	11	0.82	YES
chr20	60897506	60897713	-	LAMA5	173	92	212	12	27	3	477	42	6.90333	YES
chr19	1012188	1012461	-	C19orf6	100	43	140	1	5	2	283	8	-5.86667	YES
chr7	1521125	1522181	-	INTS1	34	28	140	6	11	2	202	19	0.0633333	YES
chr11	65315517	65318596	-	LTBP3	53	45	70	10	27	1	168	38	0.106667	YES
chr10	12221132	12226887	-	NUDT5	63	38	70	12	15	1	171	28	-0.106667	YES
chr9	139108569	139110524	-	QSOX2	23	21	70	5	9	1	114	15	0.71	YES
chr16	89724830	89735693	+	C16orf55	8	17	70	4	6	1	95	11	6.68	YES
chr3	133293960	133302845	+	CDV3	34	13	70	16	23	1	117	40	-0.123333	YES
chr9	127622544	127623697	-	RPL35	18	11	70	6	6	1	99	13	-0.00333333	YES
chr20	62660845	62663270	+	PRPF6	9	7	70	7	7	1	86	15	-0.183333	YES
chr11	70830079	70858165	-	SHANK2	23	6	70	4	8	1	99	13	0	NO
chr16	88105819	88110195	+	BANP	12	5	70	7	9	1	87	17	-3.18333	YES
chr19	10464323	10464717	-	TYK2	48	27	70	0	7	0	145	7	26.2933	YES
chr16	2983981	2987121	+	FLYWCH1	27	26	70	4	11	0	123	15	0.216667	YES
chr16	712332	712678	+	WDR90	50	19	70	3	6	0	139	9	-1.23667	YES
chr12	110152703	110181905	+	C12orf34	13	2	70	10	12	0	85	22	0.14	NO
chr8	145007520	145008165	-	PLEC	35	24	138	5	6	2	197	13	0.413333	YES
chr21	44513360	44514580	-	U2AF1	44	26	69	1	1	1	139	3	-0.0733333	YES
chrX	153672694	153673980	+	FAM50A	20	15	69	7	3	1	104	11	-1.15333	YES
chr6	2779727	2783639	+	WRNIP1	25	13	69	11	20	1	107	32	2.45	YES
chr11	77327741	77330650	-	CLNS1A	94	77	69	5	20	0	240	25	-0.0233333	YES
chr17	34870392	34870955	-	MYO19	57	53	69	5	7	0	179	12	-0.146667	YES
chr16	68387470	68389625	+	PRMT7	59	41	69	1	15	0	169	16	-1.39667	YES
chr1	981469	981539	+	AGRN	36	27	69	0	4	0	132	4	-2.70333	YES
chr10	116251638	116304763	-	ABLIM1	27	25	69	10	17	0	121	27	NA	NO
chr2	239990304	240002790	-	HDAC4	65	23	69	22	32	0	157	54	0.336667	YES
chr1	1230197	1230826	-	ACAP3	45	21	69	1	9	0	135	10	2.58333	YES
chr2	153520767	153525650	-	PRPF40A	37	20	69	8	12	0	126	20	-0.0566667	YES
chr20	60921272	60921561	-	LAMA5	38	19	69	6	7	0	126	13	0.24	YES
chr22	36629502	36635486	-	APOL2	20	15	69	9	17	0	104	26	-10.0567	YES
chr2	27440885	27444085	+	CAD	23	12	69	13	7	0	104	20	0.626667	YES
chr1	1277186	1277432	-	DVL1	25	6	69	0	2	0	100	2	-2.17333	YES
chr17	2291344	2297336	-	MNT	47	33	206	29	27	3	286	59	-4.82333	YES
chr17	17064671	17075031	+	MPRIP	245	124	2057	52	66	30	2426	148	0.19	YES
chr20	60897815	60898511	-	LAMA5	509	240	682	28	46	10	1431	84	11.84	YES
chr2	230282947	230312031	-	DNER	61	43	68	22	24	1	172	47	0.2	YES
chr16	3727660	3729719	-	TRAP1	55	38	68	1	12	1	161	14	0.393333	YES
chr3	45677744	45707141	+	LIMD1	28	25	68	23	25	1	121	49	0	YES
chr1	44818598	44820563	-	ERI3	43	23	68	13	18	1	134	32	0.373333	YES
chr7	148959449	148963425	+	ZNF783	23	21	68	7	9	1	112	17	8.04667	YES
chr10	356033	372945	-	DIP2C	24	18	68	4	23	1	110	28	-0.0966667	YES
chr19	4442339	4442921	+	CHAF1A	10	18	68	0	1	1	96	2	0.566667	YES
chr1	44085530	44085765	+	PTPRF	18	13	68	0	7	1	99	8	0.87	YES
chr19	45754898	45762246	+	MARK4	11	10	68	10	10	1	89	21	2.52667	YES
chr8	144811494	144812305	-	FAM83H	20	5	68	7	3	1	93	11	0.0766667	YES
chr19	19613336	19616152	+	GATAD2A	11	4	68	0	10	1	83	11	0.143333	YES
chr17	80207479	80209254	-	CSNK1D	62	40	68	9	8	0	170	17	0.0133333	YES
chr7	129950827	129951877	+	CPA4	71	20	68	8	17	0	159	25	-0.726667	YES
chr11	722166	722400	+	EPS8L2	49	19	68	4	2	0	136	6	6.09333	YES
chr17	74084204	74084544	-	EXOC7	40	16	68	0	1	0	124	1	-1.29333	YES
chr4	1824040	1824714	-	LETM1	16	16	68	1	0	0	100	1	-0.483333	YES
chr2	232576130	232576596	+	PTMA	25	15	68	7	7	0	108	14	-1.58333	YES
chr22	19349455	19363153	-	HIRA	18	10	68	3	6	0	96	9	-0.0866667	YES
chr3	49753911	49757943	+	RNF123	19	7	68	3	8	0	94	11	5.73333	YES
chr9	139960827	139964341	-	C9orf140	7	7	68	2	6	0	82	8	-1.17	YES
chr19	19105296	19105952	-	SUGP2	185	106	135	8	10	2	426	20	11.4533	YES
chr12	44537428	44605072	+	TMEM117	38	49	67	26	25	1	154	52	0	YES
chr1	12040542	12049221	+	MFN2	33	17	67	9	16	1	117	26	-0.0466667	YES
chr14	24687638	24701455	-	NEDD8	22	13	67	17	20	1	102	38	-0.0133333	YES
chr19	1149442	1154182	-	SBNO2	19	13	67	9	14	1	99	24	0	YES
chr20	60888517	60888704	-	LAMA5	38	7	67	3	2	1	112	6	0.09	YES
chr3	51708579	51718428	+	TEX264	13	6	67	8	9	1	86	18	-0.86	YES
chr11	6500489	6501201	-	ARFIP2	45	25	67	3	8	0	137	11	2.45333	YES
chr2	241402930	241404032	+	GPC1	35	24	67	5	10	0	126	15	0	YES
chr20	60908763	60908956	-	LAMA5	35	20	67	5	6	0	122	11	0.316667	YES
chr16	89650180	89650435	+	CPNE7	19	14	67	1	2	0	100	3	1.71667	YES
chr1	2236025	2237458	+	SKI	6	11	67	5	3	0	84	8	-0.163333	YES
chr19	803637	804035	+	PTBP1	24	10	67	3	3	0	101	6	0.203333	YES
chr19	15218333	15219866	+	SYDE1	11	8	67	3	3	0	86	6	-3.66	YES
chr16	88815888	88851308	-	FAM38A	332	200	1531	227	312	23	2063	562	0.0466667	YES
chr22	19808899	19841965	-	GNB1L	151	107	396	60	119	6	654	185	-1.55333	YES
chr7	150817233	150820880	+	AGAP3	29	26	132	6	14	2	187	22	-1.87	YES
chr17	30796212	30800818	+	PSMD11	49	38	66	6	23	1	153	30	0.0866667	YES
chr17	43003555	43003781	-	KIF18B	28	28	66	0	5	1	122	6	-8.32667	YES
chr17	34857076	34858936	-	MYO19	21	21	66	4	7	1	108	12	-1.10667	YES
chr10	28032427	28034635	-	MKX	7	7	66	4	3	1	80	8	20.2633	YES
chr1	6266787	6267438	+	RNF207	23	6	66	3	6	1	95	10	-0.596667	YES
chr19	17434694	17435525	-	ANO8	24	5	66	5	3	1	95	9	0	NO
chr20	62368065	62368885	+	LIME1	26	3	66	1	5	1	95	7	-3.56333	NO
chr2	211504784	211507207	+	CPS1	58	61	66	11	33	0	185	44	-0.00666667	YES
chr20	60926858	60926964	-	LAMA5	59	41	66	2	0	0	166	2	-0.38	YES
chr5	6739966	6742602	+	PAPD7	52	40	66	18	26	0	158	44	-1.3	YES
chr7	99687370	99688021	+	COPS6	51	40	66	5	4	0	157	9	0.246667	YES
chr8	144460517	144460865	+	RHPN1	32	27	66	4	1	0	125	5	15.9333	NO
chr1	249148251	249149578	-	ZNF692	25	27	66	3	9	0	118	12	0.153333	YES
chr2	47238575	47249000	+	TTC7A	35	24	66	11	26	0	125	37	0	YES
chr20	60893707	60893898	-	LAMA5	32	24	66	0	8	0	122	8	0.283333	YES
chr11	2973040	2975756	-	NAP1L4	43	23	66	4	17	0	132	21	0.48	YES
chr19	861957	863091	+	CFD	66	32	131	20	36	2	229	58	-6.29667	YES
chr11	75115913	75116657	+	RPS3	58	58	65	11	14	1	181	26	-0.00333333	YES
chr10	54074846	54076054	+	DKK1	59	36	65	13	25	1	160	39	0.526667	YES
chr1	117605096	117616282	+	TTF2	47	36	65	11	24	1	148	36	-0.2	YES
chr9	139996125	140000576	+	MAN1B1	66	34	65	9	11	1	165	21	-1.68667	YES
chr12	106480664	106500182	-	NUAK1	16	23	65	8	20	1	104	29	0	YES
chr16	67914120	67914459	+	EDC4	61	22	65	8	3	1	148	12	-2.51	YES
chr5	10261024	10261671	+	CCT5	36	18	65	7	6	1	119	14	0.0233333	YES
chr10	105185283	105187085	+	PDCD11	30	16	65	0	4	1	111	5	0.21	YES
chr4	2341383	2343204	-	ZFYVE28	28	16	65	6	12	1	109	19	12.9933	NO
chr7	128495369	128496571	+	FLNC	15	12	65	3	8	1	92	12	0.116667	YES
chr21	45563244	45564702	+	C21orf33	14	11	65	12	23	1	90	36	-2.00667	YES
chr12	3121399	3127710	+	TEAD4	25	9	65	7	6	1	99	14	-2.22333	NO
chr4	89859393	89912123	-	FAM13A	33	42	65	23	35	0	140	58	5.54	YES
chr17	26875724	26879355	-	UNC119	20	32	65	3	9	0	117	12	19.93	YES
chr11	61908517	61912453	+	INCENP	38	30	65	6	12	0	133	18	-1.31667	YES
chr2	39075545	39081195	-	DHX57	11	22	65	1	5	0	98	6	4.01667	YES
chr14	105175070	105175617	+	INF2	43	20	65	3	10	0	128	13	0.136667	YES
chr1	86047262	86047610	+	CYR61	14	9	65	4	3	0	88	7	1.41667	YES
chr9	140450101	140458885	-	WDR85	11	9	65	3	5	0	85	8	-2.36333	YES
chr8	144333511	144341944	+	ZFP41	23	5	65	10	9	0	93	19	35.52	NO
chr16	89653511	89655082	+	CPNE7	375	225	453	23	19	7	1053	49	-0.366667	NO
chr12	125263133	125270902	-	SCARB1	42	25	194	23	28	3	261	54	27.51	NO
chr16	88808831	88815791	-	FAM38A	49	33	258	29	53	4	340	86	0.0533333	YES
chr7	101928550	101943805	+	SH2B2	20	21	128	14	31	2	169	47	NA	NO
chr5	133902271	133909334	+	PHF15	30	20	128	8	16	2	178	26	-0.116667	YES
chr1	117624570	117626639	+	TTF2	139	67	64	9	13	1	270	23	6.53667	YES
chr17	38285881	38287789	+	MSL1	72	43	64	16	22	1	179	39	16.2533	YES
chr14	37892155	37969112	+	MIPOL1	53	43	64	28	34	1	160	63	-0.05	YES
chr1	153660698	153661428	+	NPR1	72	31	64	6	9	1	167	16	0.143333	YES
chr16	16196575	16200594	+	ABCC1	35	25	64	4	8	1	124	13	-0.41	YES
chr21	45166007	45168875	+	PDXK	46	23	64	12	11	1	133	24	-0.396667	YES
chr5	167798539	167812215	+	WWC1	34	21	64	17	28	1	119	46	-0.48	YES
chr1	1234060	1234724	-	ACAP3	48	19	64	3	7	1	131	11	-2.19333	YES
chr22	19438268	19442271	-	UFD1L	17	13	64	3	7	1	94	11	-0.273333	YES
chr19	1556923	1567462	-	MEX3D	7	6	64	2	5	1	77	8	0.573333	YES
chr10	12077441	12084912	-	UPF2	14	2	64	8	7	1	80	16	0	NO
chr12	120599863	120600650	-	GCN1L1	43	36	64	1	3	0	143	4	2.62667	YES
chr6	35996051	36020475	+	MAPK14	35	26	64	12	33	0	125	45	-0.136667	YES
chr7	156755870	156756598	+	NOM1	58	25	64	1	6	0	147	7	-4.17	YES
chr12	6494546	6495231	+	LTBR	39	24	64	3	3	0	127	6	-0.166667	YES
chr2	128018923	128028911	-	ERCC3	32	23	64	1	9	0	119	10	0.676667	YES
chr19	55753008	55753533	-	PPP6R1	30	23	64	0	2	0	117	2	-2.01667	YES
chr1	43914400	43915773	+	KIAA0467	29	22	64	3	10	0	115	13	9.58	YES
chr19	39200117	39200896	+	ACTN4	23	12	64	5	3	0	99	8	0.07	YES
chr22	22049786	22051035	+	PPIL2	13	8	64	6	6	0	85	12	-2.94667	YES
chr16	89787685	89788938	+	ZNF276	10	8	64	3	6	0	82	9	11.1733	NO
chr20	44600100	44600760	-	ZNF335	13	5	64	0	1	0	82	1	-14.8267	YES
chr3	52085139	52087955	-	DUSP7	9	3	64	3	6	0	76	9	0.16	YES
chr13	67205544	67799536	-	PCDH9	411	414	255	247	355	4	1080	606	0	NO
chr11	11362552	11394061	-	GALNTL4	49	36	191	14	18	3	276	35	0	YES
chrX	48434056	48434701	+	RBM3	223	134	127	3	9	2	484	14	4.64667	YES
chr7	100479863	100481690	+	SRRT	315	138	380	26	23	6	833	55	2.77333	YES
chr19	16641692	16643408	-	CHERP	83	39	190	7	16	3	312	26	-0.616667	YES
chr2	127808820	127816586	-	BIN1	60	26	189	25	31	3	275	59	3.88333	YES
chr1	955754	957580	+	AGRN	17	19	126	9	13	2	162	24	-0.0666667	YES
chr9	111855872	111868787	-	C9orf5	51	53	63	21	24	1	167	46	0.0766667	YES
chr1	207269961	207271494	+	C4BPB	60	40	63	24	25	1	163	50	0.116667	YES
chr7	803612	810107	+	HEATR2	13	7	63	6	14	1	83	21	-0.513333	YES
chr11	65623714	65625567	-	CFL1	16	5	63	10	4	1	84	15	0.0433333	YES
chr19	3633519	3638881	-	PIP5K1C	12	5	63	2	15	1	80	18	10.3533	NO
chr16	18810157	18812752	-	ARL6IP1	10	5	63	4	5	1	78	10	-0.04	YES
chr19	15375578	15376164	-	BRD4	21	4	63	0	0	1	88	1	0.566667	YES
chr17	3568093	3571781	-	TAX1BP3	19	2	63	4	5	1	84	10	-0.35	YES
chr2	109473427	109489906	+	CCDC138	38	30	63	10	22	0	131	32	-0.153333	YES
chr11	836443	836768	+	CD151	53	29	63	2	3	0	145	5	-0.48	YES
chr7	150761455	150761612	+	SLC4A2	23	29	63	2	2	0	115	4	0.133333	YES
chr22	19863331	19864562	-	TXNRD2	33	22	63	10	11	0	118	21	-0.376667	YES
chr20	60904112	60904193	-	LAMA5	44	21	63	2	2	0	128	4	-0.236667	YES
chr17	47075283	47076470	+	IGF2BP1	19	16	63	3	4	0	98	7	-0.26	YES
chr14	100608131	100610037	+	EVL	17	8	63	2	3	0	88	5	-1.22	YES
chr16	88709980	88712523	-	CYBA	17	7	63	7	6	0	87	13	-0.503333	YES
chr16	3024658	3025319	-	PKMYT1	6	7	63	2	1	0	76	3	1.30667	YES
chr22	45128272	45130906	+	PRR5	6	7	63	7	2	0	76	9	-1.83	YES
chr22	33198109	33245438	+	TIMP3	10	1	63	13	12	0	74	25	0	YES
chr7	150831656	150835229	+	AGAP3	95	43	251	10	21	4	389	35	1.43667	YES
chr17	79478653	79478928	-	ACTG1	134	51	188	7	8	3	373	18	0.03	YES
chr20	60928308	60937455	-	LAMA5	189	158	1002	111	197	16	1349	324	-0.266667	YES
chr16	88799141	88799685	-	FAM38A	382	210	438	25	17	7	1030	49	15.4333	YES
chr20	60908300	60908430	-	LAMA5	85	48	125	3	13	2	258	18	-1.01667	YES
chr3	50655216	50677796	+	MAPKAPK3	22	27	125	17	12	2	174	31	0.146667	YES
chr16	87872424	87873307	-	SLC7A5	117	73	187	7	13	3	377	23	-0.256667	YES
chr5	179160429	179192326	+	MAML1	49	61	124	10	33	2	234	45	0.74	YES
[truncated: 49,511 more rows]

## Sheet: AciL
chr	intron_start	intron_end	strd	gene_name	reads_AciL	reads_AciS	reads_T7Aci	reads_ContL	reads_ContS	reads_T7ContL	reads_Aci	reads_Cont	delta_pir	reliable_delta_pir
[truncated: 27,120 more rows]

[truncated: 1 more sheets: AciS]
