# Supplementary material for: The RNA-binding profile of Acinus, a peripheral component of the exon junction complex, reveals its role in splicing regulation
Source: RNA. 2016 Sep;22(9):1411–26. doi: 10.1261/rna.057158.116 (PMC4986896; doi:10.1261/rna.057158.116)
Supplement: Supplemental Material [file supp_057158.116_Supp_Table_S2.xlsx]

## Sheet: change_gene_exp
ENSEMBL_Id	normalised_count_siAci	normalised_count_siControl	foldChange siAcinus vs siControl	log2(FoldChange)	pval	padj
ENSG00000258064	112.294	3.41818	0.0304396	-5.03791	3.59125e-05	9.39498e-05
ENSG00000237829	215.703	17.0975	0.0792643	-3.65719	6.97868e-35	1.05664e-33
ENSG00000175084	29.2788	2.38454	0.0814425	-3.61807	0.000259136	0.000616721
ENSG00000079308	161.326	13.8902	0.0861001	-3.53784	2.95905e-24	2.77772e-23
ENSG00000187800	78.0966	6.81297	0.0872376	-3.51891	4.47449e-11	1.96492e-10
ENSG00000173432	230.497	20.8027	0.0902513	-3.46991	1.98504e-35	3.06469e-34
ENSG00000170298	16.5329	1.69393	0.102458	-3.2869	0.0198109	0.035161
ENSG00000101331	44.9033	4.74299	0.105627	-3.24295	7.81515e-06	2.19693e-05
ENSG00000184599	31.9762	3.38785	0.105949	-3.23856	0.000840848	0.00186636
ENSG00000270249	142.9	15.2919	0.107011	-3.22417	1.81057e-06	5.40139e-06
ENSG00000230778	34.543	3.72664	0.107884	-3.21245	0.000161714	0.000395054
ENSG00000162366	114.861	12.6237	0.109904	-3.18568	5.50253e-15	3.15585e-14
ENSG00000116254	102.887	11.5187	0.111955	-3.15901	3.82519e-13	1.94685e-12
ENSG00000128165	160.395	18.7871	0.11713	-3.09381	1.71811e-18	1.20745e-17
ENSG00000102539	19.8789	2.3715	0.119297	-3.06737	0.0109866	0.0204408
ENSG00000048462	19.192	2.40092	0.1251	-2.99885	0.0138747	0.0253245
ENSG00000128482	39.9932	5.14482	0.128643	-2.95856	7.99818e-05	0.000202354
ENSG00000128965	1122.88	151.68	0.135081	-2.8881	9.98505e-10	3.98335e-09
ENSG00000161905	24.7587	3.40648	0.137588	-2.86158	0.00472283	0.00936035
ENSG00000229544	20.204	3.04907	0.150914	-2.7282	0.017174	0.0308193
ENSG00000178997	33.4671	5.10972	0.152679	-2.71143	0.000882245	0.00195189
ENSG00000249693	21.1303	3.40648	0.161213	-2.63296	0.016064	0.0289533
ENSG00000272000	45.164	7.48867	0.165811	-2.59239	0.000100909	0.000252129
ENSG00000204659	46.5009	7.83686	0.168532	-2.56891	8.32789e-05	0.000210187
ENSG00000248710	33.4867	5.75935	0.171989	-2.53961	0.0015021	0.00321664
ENSG00000183186	81.7609	14.3587	0.175618	-2.50949	9.81594e-07	3.01376e-06
ENSG00000197808	26.706	4.76912	0.178579	-2.48537	0.00677986	0.0130794
ENSG00000179776	100.615	18.0456	0.179353	-2.47913	8.97771e-10	3.59429e-09
ENSG00000182175	173.736	31.3428	0.180405	-2.47069	2.29133e-17	1.50384e-16
ENSG00000100813	26970.1	4936.16	0.183024	-2.4499	0	0
ENSG00000075290	69.3756	12.9485	0.186643	-2.42164	1.42519e-06	4.29831e-06
ENSG00000148357	27.3232	5.11211	0.187098	-2.41814	0.00692528	0.0133321
ENSG00000054179	402.068	75.6611	0.18818	-2.40982	3.19344e-20	2.45671e-19
ENSG00000260272	150.162	28.4399	0.189395	-2.40053	1.60249e-06	4.80075e-06
ENSG00000221843	376.487	71.5032	0.189922	-2.39652	1.60152e-38	2.75757e-37
ENSG00000101638	183.664	35.1259	0.191251	-2.38646	2.01719e-12	9.71793e-12
ENSG00000130377	24.4044	4.74299	0.19435	-2.36327	0.0140278	0.0255712
ENSG00000077616	24.3938	4.76908	0.195504	-2.35473	0.0139975	0.025522
ENSG00000128606	22.4697	4.40421	0.196007	-2.35102	0.020676	0.0365436
ENSG00000242361	153.862	30.3045	0.196958	-2.34404	0.0049355	0.0097541
ENSG00000172379	41.26	8.18124	0.198285	-2.33435	0.0175515	0.0314535
ENSG00000107159	418.146	84.5017	0.202087	-2.30695	1.27705e-37	2.13104e-36
ENSG00000182264	38.7154	7.82426	0.202097	-2.30688	0.0011243	0.00245452
ENSG00000007314	132.113	26.9908	0.2043	-2.29124	7.62419e-12	3.53721e-11
ENSG00000124507	66.7494	13.6681	0.204767	-2.28795	0.00190867	0.0040214
ENSG00000125462	585.554	119.962	0.204869	-2.28723	2.00197e-11	9.01605e-11
ENSG00000206262	73.3208	15.383	0.209804	-2.25289	2.05656e-06	6.1097e-06
ENSG00000181773	109.631	23.1648	0.211299	-2.24264	1.71744e-09	6.6931e-09
ENSG00000172955	41.63	8.86908	0.213046	-2.23077	0.000855767	0.00189679
ENSG00000188095	69.9	14.9929	0.21449	-2.22102	4.9959e-06	1.42951e-05
ENSG00000006047	1358.39	291.804	0.214817	-2.21882	5.76666e-140	1.11674e-137
ENSG00000132518	26.3856	5.79297	0.21955	-2.18738	0.0139548	0.0254529
ENSG00000102879	310.142	68.4435	0.220685	-2.17994	5.29281e-12	2.48423e-11
ENSG00000167281	23.1151	5.10972	0.221056	-2.17752	0.0249408	0.0433679
ENSG00000173213	62.847	13.9827	0.222487	-2.16821	2.61697e-05	6.9576e-05
ENSG00000124253	79.3555	17.7064	0.223128	-2.16406	1.32431e-06	4.01102e-06
ENSG00000126259	239.143	53.879	0.225301	-2.15008	1.186e-20	9.33449e-20
ENSG00000187808	25.738	5.80974	0.225727	-2.14735	0.0168269	0.0302275
ENSG00000170689	2017.22	461.219	0.228641	-2.12884	1.03606e-192	3.86946e-190
ENSG00000196074	776.337	178.916	0.230461	-2.1174	8.60416e-15	4.88472e-14
ENSG00000126895	26.3512	6.15507	0.233578	-2.09802	0.0167709	0.0301442
ENSG00000141576	1068.26	256.301	0.239923	-2.05935	6.86241e-98	5.85021e-96
ENSG00000136859	84.9284	20.7798	0.244674	-2.03107	1.48572e-06	4.46884e-06
ENSG00000173557	207.613	51.4127	0.247638	-2.0137	3.12717e-16	1.9335e-15
ENSG00000165905	1900.09	475.061	0.250021	-1.99988	2.21807e-54	6.158e-53
ENSG00000162745	81.7064	20.8087	0.254677	-1.97326	4.07269e-06	1.17672e-05
ENSG00000085552	205.405	53.1165	0.258594	-1.95124	1.20945e-12	5.92674e-12
ENSG00000205129	165.757	42.9655	0.259207	-1.94782	3.06172e-12	1.45932e-11
ENSG00000163958	70.6332	18.4157	0.260723	-1.93941	3.09942e-05	8.15731e-05
ENSG00000242866	113.005	29.5544	0.261532	-1.93494	8.37332e-07	2.58704e-06
ENSG00000171812	114.484	30.3017	0.26468	-1.91768	3.31583e-08	1.16489e-07
ENSG00000104888	29.3234	7.83491	0.26719	-1.90406	0.0187191	0.0333705
ENSG00000175832	1060.94	283.578	0.26729	-1.90352	8.47461e-51	2.158e-49
ENSG00000126218	47.1448	12.62	0.267686	-1.90139	0.00133065	0.00287144
ENSG00000086159	31.8954	8.57471	0.268838	-1.89519	0.0118504	0.0219049
ENSG00000179855	1512.01	410.041	0.27119	-1.88263	3.08582e-92	2.28321e-90
ENSG00000188883	589.042	161.109	0.27351	-1.87033	2.80528e-44	5.78995e-43
ENSG00000186376	384.962	105.619	0.274362	-1.86585	3.81748e-28	4.29254e-27
ENSG00000127561	401.164	110.065	0.274365	-1.86583	2.0429e-29	2.44432e-28
ENSG00000129991	28.5815	7.86299	0.275107	-1.86193	0.020596	0.0364185
ENSG00000165887	81.3159	22.4737	0.276375	-1.8553	1.14205e-05	3.15503e-05
ENSG00000119411	81.3931	22.5175	0.276652	-1.85386	1.12797e-05	3.11832e-05
ENSG00000189410	75.1368	20.8189	0.277081	-1.85162	2.85841e-05	7.56744e-05
ENSG00000013725	78.1316	21.8181	0.279248	-1.84038	2.05367e-05	5.51417e-05
ENSG00000100311	325.698	91.0226	0.279469	-1.83924	3.97413e-23	3.51598e-22
ENSG00000106327	2117.15	596.64	0.281813	-1.82719	2.04756e-125	2.79287e-123
ENSG00000198959	582.97	166.597	0.285773	-1.80706	9.80509e-42	1.8688e-40
ENSG00000103154	115.395	33.0581	0.286477	-1.80351	1.09196e-07	3.65602e-07
ENSG00000167371	48.5217	13.9923	0.288372	-1.79399	0.025681	0.0445168
ENSG00000019102	37.6745	10.8952	0.289194	-1.78989	0.00761036	0.0145403
ENSG00000114854	1310.35	380.771	0.290587	-1.78296	2.89047e-46	6.26243e-45
ENSG00000158859	50.7458	14.7485	0.290635	-1.78272	0.0129006	0.023701
ENSG00000157554	80.8154	23.5107	0.290918	-1.78131	0.000428312	0.000990637
ENSG00000132383	17344.9	5062.46	0.29187	-1.7766	2.4004e-231	1.25509e-228
ENSG00000146205	224.89	65.7761	0.292481	-1.77358	5.64615e-15	3.23586e-14
ENSG00000123685	61.2387	18.0532	0.2948	-1.76219	0.000381513	0.000887894
ENSG00000178403	62.8747	18.754	0.298276	-1.74528	0.000335047	0.000785934
ENSG00000105048	1544.19	461.335	0.298755	-1.74296	1.49914e-111	1.61066e-109
ENSG00000241106	47.5416	14.3751	0.302369	-1.72562	0.00265287	0.00547251
ENSG00000139445	388.268	119.25	0.307132	-1.70307	5.51092e-25	5.37255e-24
ENSG00000163083	1849.05	575.124	0.311038	-1.68484	2.5664e-125	3.44073e-123
ENSG00000074317	98.5912	30.6857	0.311242	-1.68389	4.50112e-06	1.29431e-05
ENSG00000143320	10431.3	3251.39	0.311694	-1.6818	3.19433e-226	1.51837e-223
ENSG00000134317	1516.11	473.995	0.312638	-1.67743	1.9867e-103	1.91186e-101
ENSG00000177374	52.1035	16.4096	0.314943	-1.66684	0.00196984	0.00413806
ENSG00000139318	374.519	118.2	0.315604	-1.66381	2.82326e-23	2.51623e-22
ENSG00000138336	362.746	114.542	0.315763	-1.66308	1.59067e-22	1.35752e-21
ENSG00000163884	128.009	40.531	0.316627	-1.65915	6.35802e-06	1.80184e-05
ENSG00000108387	299.129	95.0801	0.317857	-1.65355	3.14031e-18	2.17095e-17
ENSG00000172638	141.475	44.9969	0.318056	-1.65265	1.90356e-08	6.83277e-08
ENSG00000180066	68.3381	21.8078	0.319116	-1.64785	0.0024894	0.00516313
ENSG00000126562	312.955	100.172	0.320085	-1.64347	8.24977e-16	4.99059e-15
ENSG00000267216	210.378	67.442	0.320575	-1.64126	1.47736e-12	7.18123e-12
ENSG00000105357	150.103	48.1434	0.320735	-1.64055	6.90851e-09	2.56611e-08
ENSG00000228672	66.4218	21.4587	0.323067	-1.63009	0.00043118	0.000996683
ENSG00000143578	1126.44	364.383	0.323482	-1.62824	9.72527e-74	4.60878e-72
ENSG00000124257	80.1033	25.94	0.323831	-1.62669	8.04487e-05	0.00020347
ENSG00000104808	44.01	14.3013	0.324956	-1.62169	0.00653501	0.012646
ENSG00000185269	541.73	176.187	0.325229	-1.62047	5.21862e-33	7.30234e-32
ENSG00000145911	1815.94	591.014	0.325459	-1.61945	4.6708e-116	5.34789e-114
ENSG00000186642	158.629	51.7618	0.326308	-1.6157	1.52322e-06	4.57463e-06
ENSG00000169894	270.474	88.2764	0.326376	-1.61539	4.39423e-16	2.69355e-15
ENSG00000132688	13611.7	4444.17	0.326496	-1.61486	0	0
ENSG00000240694	935.967	307.795	0.328852	-1.60449	3.82798e-59	1.19852e-57
ENSG00000179148	75.8202	24.9516	0.329089	-1.60345	0.000157248	0.000384983
ENSG00000039139	339.109	111.637	0.329205	-1.60294	7.20179e-20	5.45999e-19
ENSG00000139597	33.2356	10.9546	0.329604	-1.6012	0.0231631	0.0405555
ENSG00000182575	73.3472	24.1816	0.329687	-1.60083	0.000230517	0.000552466
ENSG00000178150	808.109	266.849	0.330214	-1.59853	2.58771e-23	2.31023e-22
ENSG00000255072	286.092	95.306	0.33313	-1.58584	3.61663e-06	1.05212e-05
ENSG00000168243	393.542	132.631	0.337018	-1.5691	1.327e-22	1.13497e-21
ENSG00000117148	472.012	161.818	0.342827	-1.54445	2.95195e-20	2.27652e-19
ENSG00000108309	41.6071	14.3018	0.343734	-1.54064	0.0155978	0.0282004
ENSG00000152969	114.479	39.4862	0.344922	-1.53566	2.95737e-06	8.64987e-06
ENSG00000198576	366.318	126.736	0.345973	-1.53127	3.1838e-20	2.4505e-19
ENSG00000153574	2143.91	741.807	0.346006	-1.53113	1.03576e-88	7.03328e-87
ENSG00000179673	89.5309	30.9946	0.346189	-1.53037	5.88199e-05	0.000150957
ENSG00000189431	242.919	84.1526	0.346423	-1.52939	2.72487e-13	1.39589e-12
ENSG00000111846	4409.94	1535.32	0.348149	-1.52222	2.33995e-207	9.41141e-205
ENSG00000101265	1030.58	359.22	0.34856	-1.52052	1.46243e-60	4.7991e-59
ENSG00000259803	162.191	56.5804	0.348851	-1.51932	1.10776e-08	4.04666e-08
ENSG00000186897	424.934	148.24	0.348856	-1.5193	7.51685e-20	5.68511e-19
ENSG00000171388	250.307	87.5498	0.34977	-1.51552	1.48112e-13	7.71601e-13
ENSG00000173992	1927.77	684.075	0.354852	-1.49471	4.47559e-92	3.28056e-90
ENSG00000133393	4847.04	1725.52	0.355995	-1.49007	9.58455e-222	4.29552e-219
ENSG00000131747	61561.7	21957.7	0.356679	-1.4873	0	0
ENSG00000126500	42.0112	14.9864	0.356724	-1.48712	0.0133678	0.0244962
ENSG00000167646	873.026	312.482	0.35793	-1.48225	1.01787e-21	8.40775e-21
ENSG00000150764	60.9658	21.8334	0.358126	-1.48146	0.00578611	0.0112999
ENSG00000163357	51.4199	18.4176	0.35818	-1.48124	0.0051165	0.0100763
ENSG00000105255	1281.01	459.793	0.35893	-1.47823	1.67075e-72	7.55254e-71
ENSG00000188176	54.0379	19.4167	0.359315	-1.47668	0.00403371	0.0080705
ENSG00000124098	4485.94	1614.14	0.359823	-1.47464	5.94364e-125	7.76933e-123
ENSG00000163485	504.63	181.635	0.359936	-1.47419	1.06443e-26	1.13121e-25
ENSG00000204086	50.1024	18.0499	0.36026	-1.47289	0.00613939	0.0119319
ENSG00000092295	144.608	52.1062	0.360328	-1.47262	3.83676e-05	0.000100055
ENSG00000171435	165.778	59.9645	0.361715	-1.46708	1.78241e-08	6.4111e-08
ENSG00000100060	110.889	40.2067	0.362584	-1.46361	9.78724e-06	2.72107e-05
ENSG00000106333	1009.37	366.252	0.362853	-1.46254	8.41981e-56	2.43677e-54
ENSG00000173376	58.9496	21.4769	0.364327	-1.45669	0.00268441	0.00553466
ENSG00000189266	13272.9	4840.08	0.36466	-1.45538	0	0
ENSG00000163888	181.522	66.4556	0.366102	-1.44968	3.64128e-09	1.37764e-08
ENSG00000164078	6755.65	2482.56	0.367479	-1.44427	1.83549e-131	2.79529e-129
ENSG00000119915	322.68	118.649	0.367699	-1.4434	2.51483e-16	1.566e-15
ENSG00000124920	1216.08	447.914	0.368326	-1.44094	3.35592e-66	1.29022e-64
ENSG00000027869	2613.73	963.504	0.368632	-1.43975	2.39502e-132	3.87301e-130
ENSG00000117519	4002.89	1478.52	0.369364	-1.43689	7.75498e-183	2.64445e-180
ENSG00000169605	173.276	64.0687	0.369748	-1.43538	4.43076e-08	1.54446e-07
ENSG00000107859	119.757	44.3029	0.36994	-1.43464	5.18112e-06	1.47927e-05
ENSG00000118513	586.679	217.391	0.370545	-1.43228	5.72198e-30	7.02308e-29
ENSG00000188060	822.259	305.065	0.371009	-1.43048	2.80467e-43	5.57592e-42
ENSG00000114124	36.4317	13.5868	0.372939	-1.42299	0.0290152	0.0497794
ENSG00000133134	714.022	267.16	0.374162	-1.41827	1.46146e-36	2.35123e-35
ENSG00000258839	1049.64	392.821	0.374242	-1.41796	4.38625e-35	6.71247e-34
ENSG00000159753	584.135	219.091	0.375069	-1.41477	2.76174e-29	3.28435e-28
ENSG00000184261	88.8681	33.402	0.375861	-1.41173	0.000170896	0.000416254
ENSG00000145022	2617.66	988.064	0.377461	-1.4056	1.17255e-124	1.50759e-122
ENSG00000151164	116.304	43.9972	0.378294	-1.40242	1.09631e-05	3.0383e-05
ENSG00000230797	1128.66	428.347	0.379519	-1.39776	1.46679e-58	4.50256e-57
ENSG00000243897	248.331	94.3857	0.38008	-1.39562	0.000404599	0.000938976
ENSG00000189060	33480.1	12783.6	0.381826	-1.38901	0	0
ENSG00000135502	1363.66	521.211	0.382216	-1.38754	8.75219e-70	3.69051e-68
ENSG00000166780	1911.15	734.318	0.384228	-1.37997	2.92246e-57	8.71516e-56
ENSG00000189120	360.621	138.643	0.384456	-1.37911	4.16228e-17	2.69346e-16
ENSG00000130270	1153.28	443.516	0.384571	-1.37868	1.16663e-58	3.60943e-57
ENSG00000052802	3816.01	1469.09	0.38498	-1.37714	1.31093e-164	3.37103e-162
ENSG00000185664	291.154	112.098	0.385014	-1.37702	9.95796e-14	5.2522e-13
ENSG00000196155	2485.27	957.098	0.385108	-1.37667	5.41314e-118	6.43261e-116
ENSG00000176244	172.54	66.4751	0.385275	-1.37604	3.97265e-08	1.38941e-07
ENSG00000099994	2051.76	793.664	0.386821	-1.37026	2.50335e-80	1.39246e-78
ENSG00000171401	93.2033	36.1693	0.388069	-1.36561	0.000265763	0.000632012
ENSG00000132561	1617.66	628.896	0.388768	-1.36302	1.11983e-79	6.09917e-78
ENSG00000157388	262.92	102.625	0.390328	-1.35724	2.75741e-12	1.31587e-11
ENSG00000126583	130.553	51.1066	0.391464	-1.35305	4.61963e-06	1.32571e-05
ENSG00000176387	1254.37	491.183	0.391578	-1.35263	7.16511e-62	2.42747e-60
ENSG00000158164	60.8659	23.8344	0.391589	-1.35259	0.0039056	0.00783418
ENSG00000010319	212.453	83.4695	0.392885	-1.34782	9.39892e-10	3.75622e-09
ENSG00000231631	564.808	222.914	0.394672	-1.34127	5.7893e-14	3.09935e-13
ENSG00000125148	32141.1	12769.6	0.397299	-1.3317	0	0
ENSG00000166924	234.915	93.99	0.400102	-1.32156	2.13505e-08	7.61838e-08
ENSG00000176678	523.866	210.641	0.402089	-1.31441	2.00504e-23	1.80132e-22
ENSG00000170571	1871.28	754.507	0.403204	-1.31042	2.59208e-85	1.6199e-83
ENSG00000188707	1068.95	431.076	0.40327	-1.31018	4.02845e-50	1.00302e-48
ENSG00000132622	42.0227	16.9653	0.403718	-1.30858	0.0286573	0.04923
ENSG00000169989	68.3633	27.6026	0.403763	-1.30842	0.00253956	0.00525466
ENSG00000105605	229.686	93.0567	0.405148	-1.30348	4.19159e-10	1.71939e-09
ENSG00000133111	504.756	204.531	0.405207	-1.30327	9.81989e-17	6.24634e-16
ENSG00000173988	47.8362	19.4424	0.406436	-1.2989	0.0157699	0.0284817
ENSG00000100302	92.7967	37.7718	0.407038	-1.29676	0.000318248	0.000748769
ENSG00000181577	332.047	135.349	0.407619	-1.29471	2.25189e-14	1.2429e-13
ENSG00000206172	7021	2867.71	0.408448	-1.29177	4.73333e-36	7.49969e-35
ENSG00000241978	804.238	328.515	0.408479	-1.29166	3.50997e-36	5.57261e-35
ENSG00000129473	3911.57	1597.8	0.408482	-1.29166	1.83896e-150	4.06281e-148
ENSG00000168913	247.556	101.228	0.40891	-1.29015	9.25555e-11	3.98088e-10
ENSG00000251201	1526.88	624.439	0.408966	-1.28995	3.53224e-69	1.47358e-67
ENSG00000163462	292.563	119.669	0.409036	-1.2897	1.39288e-12	6.78951e-12
ENSG00000178878	840.267	344.161	0.409586	-1.28776	8.93723e-38	1.49775e-36
ENSG00000167525	236.962	97.1072	0.409801	-1.287	6.02943e-08	2.07362e-07
ENSG00000225968	251.029	102.888	0.409865	-1.28678	7.53135e-11	3.25805e-10
ENSG00000116983	93.0472	38.1488	0.409994	-1.28633	0.000331385	0.00077781
ENSG00000180044	258.331	105.937	0.410082	-1.28602	3.527e-11	1.56152e-10
ENSG00000159231	413.365	169.727	0.410599	-1.2842	8.88073e-18	5.98381e-17
ENSG00000167550	220.475	90.6973	0.411372	-1.28148	2.28094e-08	8.12231e-08
ENSG00000265264	51.413	21.1536	0.411444	-1.28123	0.0125108	0.0230308
ENSG00000163412	1272.41	524.13	0.41192	-1.27956	1.8051e-57	5.4036e-56
ENSG00000261794	66.0557	27.2601	0.412683	-1.27689	0.00372924	0.00751405
ENSG00000267757	853.385	352.693	0.413288	-1.27478	8.0961e-38	1.35824e-36
ENSG00000196337	96.9001	40.1596	0.414443	-1.27075	0.000270716	0.000642526
ENSG00000025423	435.409	180.692	0.414993	-1.26884	2.09684e-18	1.4677e-17
ENSG00000175643	873.032	362.312	0.415004	-1.2688	1.61703e-38	2.78123e-37
ENSG00000203727	221.264	92.011	0.415842	-1.26589	2.43392e-09	9.35516e-09
ENSG00000234745	244.207	101.577	0.415948	-1.26552	2.33486e-06	6.89729e-06
ENSG00000055118	616.036	256.565	0.416478	-1.26369	3.39763e-26	3.51088e-25
ENSG00000156509	870.446	362.605	0.416574	-1.26336	3.94039e-38	6.68205e-37
ENSG00000081923	908.929	378.701	0.416646	-1.26311	6.09101e-40	1.10839e-38
ENSG00000120075	432.592	180.258	0.416693	-1.26294	3.9428e-18	2.70664e-17
ENSG00000145569	6687.55	2792.2	0.417521	-1.26008	3.60304e-146	7.63748e-144
ENSG00000171695	61.8944	25.8928	0.418338	-1.25726	0.00598092	0.0116543
ENSG00000104368	95.2525	39.8847	0.418726	-1.25592	0.000346569	0.000811629
ENSG00000111664	380.804	159.553	0.41899	-1.25501	8.46479e-16	5.11277e-15
ENSG00000186480	5418.73	2272.16	0.419315	-1.25389	3.8323e-30	4.7483e-29
ENSG00000170270	1443.99	607.712	0.420857	-1.2486	2.69508e-62	9.21024e-61
ENSG00000168394	2092.4	881.495	0.421285	-1.24713	3.84537e-28	4.32081e-27
ENSG00000135842	837.579	352.984	0.421434	-1.24662	8.59498e-36	1.34821e-34
ENSG00000116014	183.517	77.3826	0.421665	-1.24583	1.37054e-07	4.54414e-07
ENSG00000161860	252.054	106.339	0.42189	-1.24506	1.93054e-10	8.10992e-10
ENSG00000258555	301.982	127.841	0.423338	-1.24012	3.82106e-06	1.10769e-05
ENSG00000160471	108.345	46.0416	0.424955	-1.23462	0.000137449	0.000338625
ENSG00000049089	108.995	46.3385	0.425142	-1.23398	0.000132955	0.000328017
ENSG00000167771	322.28	137.035	0.425205	-1.23377	5.18506e-13	2.61436e-12
ENSG00000137474	72.8996	31.0273	0.425617	-1.23237	0.00275402	0.00566552
ENSG00000074181	229.241	97.7721	0.426503	-1.22937	2.76917e-09	1.05996e-08
ENSG00000175175	243.633	103.955	0.426687	-1.22875	6.70697e-10	2.70451e-09
ENSG00000139626	75.8703	32.4231	0.427349	-1.22651	0.00223634	0.00467163
ENSG00000104953	225.182	96.3615	0.427927	-1.22456	4.50052e-09	1.69334e-08
ENSG00000143515	1743.5	748.399	0.429252	-1.2201	2.31855e-71	1.02159e-69
ENSG00000162894	59.4919	25.5405	0.42931	-1.21991	0.00870653	0.0164523
ENSG00000239789	5532.82	2376.41	0.429511	-1.21923	1.24671e-171	3.76073e-169
ENSG00000187486	532.8	228.964	0.429737	-1.21848	2.92873e-21	2.37294e-20
ENSG00000257242	95.0046	40.8987	0.430492	-1.21594	0.000508506	0.00116274
ENSG00000110324	77.5156	33.3974	0.430848	-1.21475	0.00216257	0.00452475
ENSG00000183248	690.551	297.814	0.43127	-1.21334	3.8483e-24	3.59741e-23
ENSG00000168175	15651.5	6751.69	0.431377	-1.21298	2.01412e-123	2.52747e-121
ENSG00000108511	1267.51	547.691	0.432101	-1.21056	2.08856e-52	5.55274e-51
ENSG00000134955	98.2972	42.5241	0.432607	-1.20887	0.000426954	0.000987787
ENSG00000117245	177.928	77.0115	0.432824	-1.20815	4.50918e-07	1.42603e-06
ENSG00000070087	20877.2	9043.89	0.433195	-1.20691	3.49395e-273	2.60981e-270
ENSG00000184584	1143.81	496.867	0.434397	-1.20291	5.70644e-47	1.25895e-45
ENSG00000214336	49.4564	21.4858	0.434439	-1.20277	0.0205411	0.0363337
ENSG00000113739	5817.16	2529.81	0.434888	-1.20128	2.65634e-40	4.89053e-39
ENSG00000206331	278.705	121.259	0.435079	-1.20065	0.00145258	0.00311826
ENSG00000196510	18552.1	8081.38	0.435604	-1.19891	1.8516e-264	1.26279e-261
ENSG00000090339	1339.41	583.553	0.43568	-1.19866	2.13436e-54	5.94664e-53
ENSG00000176092	626.008	272.744	0.435688	-1.19863	1.18637e-24	1.14168e-23
ENSG00000175414	3379.54	1473.53	0.436014	-1.19755	2.38091e-117	2.78709e-115
ENSG00000100218	71.2397	31.074	0.43619	-1.19697	0.0038509	0.00773434
ENSG00000008516	1035.34	451.869	0.436444	-1.19613	4.66033e-42	8.91487e-41
ENSG00000141736	9351.33	4095.84	0.437995	-1.19101	3.05289e-165	7.98126e-163
ENSG00000112761	45.8882	20.133	0.438741	-1.18856	0.0284509	0.0489129
ENSG00000179750	1615.73	709.891	0.439361	-1.18652	1.19976e-63	4.26744e-62
ENSG00000120051	79.7556	35.1067	0.440179	-1.18384	0.00222763	0.00465405
ENSG00000100593	321.464	141.817	0.441158	-1.18063	3.36087e-12	1.59754e-11
ENSG00000151882	155.262	68.815	0.443218	-1.17391	5.67539e-06	1.61393e-05
ENSG00000183655	773.06	343.096	0.443816	-1.17197	6.89916e-30	8.44152e-29
ENSG00000147166	90.4913	40.2515	0.44481	-1.16874	0.00107484	0.00235112
ENSG00000108840	2403.68	1069.46	0.444924	-1.16837	3.11114e-24	2.91874e-23
ENSG00000023892	116.944	52.0945	0.445467	-1.16661	0.00095588	0.00210402
ENSG00000100092	887.423	395.399	0.445558	-1.16631	1.99486e-34	2.97446e-33
ENSG00000197279	672.04	299.651	0.445883	-1.16526	1.7736e-25	1.76864e-24
ENSG00000153179	2330.37	1041.45	0.446902	-1.16197	1.88051e-47	4.22604e-46
ENSG00000100097	52042.6	23263.2	0.447004	-1.16164	2.36751e-75	1.19028e-73
ENSG00000142910	4359.8	1951.06	0.447511	-1.16	4.18227e-135	7.20914e-133
ENSG00000136206	76.0746	34.0614	0.447737	-1.15928	0.00345767	0.00699743
ENSG00000164949	369.229	165.329	0.447768	-1.15918	1.18775e-13	6.23112e-13
ENSG00000130433	169.685	76.0381	0.448114	-1.15806	2.18369e-06	6.46657e-06
ENSG00000050628	5437.34	2437.42	0.448274	-1.15755	6.00242e-42	1.14682e-40
ENSG00000198563	9141.72	4100.76	0.448576	-1.15657	1.11817e-201	4.27794e-199
ENSG00000140682	941.916	423.001	0.449086	-1.15494	3.11633e-21	2.52103e-20
ENSG00000119630	217.765	97.8216	0.449208	-1.15455	4.73572e-08	1.64492e-07
ENSG00000219607	80.4037	36.1198	0.44923	-1.15447	0.00261235	0.00539175
ENSG00000129038	96.3815	43.3146	0.449407	-1.1539	0.000778835	0.00173608
ENSG00000065717	3014.94	1355.44	0.449573	-1.15337	1.01179e-102	9.56079e-101
ENSG00000165046	110.439	49.7397	0.450382	-1.15078	0.00398313	0.0079754
ENSG00000085741	489.547	220.555	0.450529	-1.15031	2.4654e-15	1.44894e-14
ENSG00000128564	123.272	55.5514	0.45064	-1.14995	0.000100423	0.000250954
ENSG00000158402	2532.93	1141.65	0.450721	-1.14969	4.46032e-89	3.09578e-87
ENSG00000188112	83.9927	37.8716	0.450892	-1.14915	0.00204671	0.00429208
ENSG00000077713	2739.33	1235.38	0.450981	-1.14886	9.79028e-95	7.64032e-93
ENSG00000137285	147.493	66.5601	0.451276	-1.14792	4.982e-05	0.000128829
ENSG00000135424	1329.78	602.524	0.4531	-1.1421	5.51663e-50	1.36059e-48
ENSG00000186806	639.049	289.696	0.453324	-1.14139	2.1944e-23	1.96693e-22
ENSG00000147234	102.955	46.6828	0.453431	-1.14104	0.000542675	0.00123493
ENSG00000099958	276.101	125.368	0.454065	-1.13903	6.08748e-10	2.46548e-09
ENSG00000092758	186.592	84.8661	0.454822	-1.13663	7.98938e-07	2.47524e-06
ENSG00000185361	1130.97	514.611	0.455017	-1.13601	1.95787e-42	3.80088e-41
ENSG00000089356	220.024	100.239	0.455582	-1.13422	5.24228e-08	1.81364e-07
ENSG00000132470	6742.94	3074.07	0.455894	-1.13323	6.15589e-83	3.67153e-81
ENSG00000095596	172.594	78.7605	0.456333	-1.13184	2.65203e-06	7.79751e-06
ENSG00000092529	94.0572	42.9217	0.456335	-1.13183	0.00112868	0.00246238
ENSG00000166833	4158.04	1898.07	0.456483	-1.13137	1.83977e-35	2.84883e-34
ENSG00000067369	8910.5	4072.99	0.4571	-1.12942	2.44679e-191	8.52898e-189
ENSG00000037280	182.51	83.4952	0.457482	-1.12821	1.25605e-06	3.81608e-06
ENSG00000108379	930.132	425.6	0.457569	-1.12794	2.5771e-34	3.83169e-33
ENSG00000170175	631.636	289.516	0.458359	-1.12545	1.25239e-22	1.07291e-21
ENSG00000130052	1652.59	757.55	0.4584	-1.12532	1.41455e-59	4.49163e-58
ENSG00000128536	476.497	218.856	0.459301	-1.12249	8.63469e-17	5.51481e-16
ENSG00000154217	1011.55	464.939	0.45963	-1.12145	7.27702e-19	5.21459e-18
ENSG00000120833	3502.65	1611.46	0.46007	-1.12008	3.95705e-109	4.11061e-107
ENSG00000142621	283.138	130.5	0.460906	-1.11746	6.21302e-10	2.51308e-09
ENSG00000217236	215.772	99.5702	0.461461	-1.11572	1.0981e-07	3.67502e-07
ENSG00000107719	1580.22	729.437	0.461604	-1.11527	2.18482e-56	6.44192e-55
ENSG00000164404	54.7203	25.2605	0.46163	-1.11519	0.0204924	0.0362639
ENSG00000128040	95.0009	43.9782	0.462924	-1.11115	0.00123173	0.00267306
ENSG00000160233	733.111	339.383	0.462935	-1.11112	5.25822e-26	5.37723e-25
ENSG00000102743	2035.37	943.539	0.463571	-1.10914	3.61852e-34	5.34465e-33
ENSG00000151692	1241.79	575.839	0.463715	-1.10869	2.08587e-36	3.33187e-35
ENSG00000185614	111.596	51.7781	0.46398	-1.10787	0.000385922	0.000897757
ENSG00000160161	155.621	72.2332	0.464162	-1.1073	1.47406e-05	4.03105e-05
ENSG00000120055	99.8879	46.3907	0.464428	-1.10647	0.000895297	0.00198021
ENSG00000162620	205.199	95.4371	0.465095	-1.1044	3.18159e-07	1.01891e-06
ENSG00000106003	192.704	89.73	0.465637	-1.10272	8.76919e-07	2.70455e-06
ENSG00000159239	195.248	90.9685	0.465912	-1.10187	7.55674e-07	2.34816e-06
ENSG00000206455	521.529	242.994	0.465925	-1.10183	7.10822e-18	4.83101e-17
ENSG00000234674	521.529	242.994	0.465925	-1.10183	7.10822e-18	4.83101e-17
ENSG00000172059	2668.02	1246.45	0.467182	-1.09794	1.30576e-24	1.25426e-23
ENSG00000120832	1180.77	551.802	0.467325	-1.0975	8.54833e-39	1.48001e-37
ENSG00000182308	78.0526	36.4763	0.46733	-1.09749	0.00449785	0.00894854
ENSG00000123427	680.167	318.366	0.46807	-1.0952	1.78041e-23	1.60965e-22
ENSG00000008517	158.335	74.305	0.469291	-1.09144	1.45092e-05	3.96983e-05
ENSG00000128512	3504.4	1645.86	0.469653	-1.09033	2.74201e-104	2.7051e-102
ENSG00000074276	63.7637	29.9932	0.470381	-1.0881	0.0126685	0.0233073
ENSG00000080644	192.423	90.6544	0.47112	-1.08583	4.71017e-06	1.3512e-05
ENSG00000205795	59.202	27.9521	0.472148	-1.08269	0.0176301	0.0315835
ENSG00000214575	840.01	396.905	0.472499	-1.08162	7.6905e-29	8.92258e-28
ENSG00000004838	174.731	82.5684	0.472545	-1.08148	2.61371e-05	6.95011e-05
ENSG00000165943	2088.28	986.96	0.472619	-1.08125	1.65516e-68	6.76114e-67
ENSG00000178078	202.258	95.7269	0.47329	-1.0792	8.49962e-06	2.37741e-05
ENSG00000115163	5534.46	2623.46	0.474022	-1.07697	3.44746e-138	6.21572e-136
ENSG00000181418	913.946	434.145	0.475022	-1.07393	6.78916e-29	7.90608e-28
ENSG00000183979	282.21	134.317	0.475947	-1.07113	2.46513e-09	9.4728e-09
ENSG00000105711	462.768	220.387	0.476236	-1.07025	3.67255e-15	2.13203e-14
ENSG00000136167	241.799	115.162	0.476272	-1.07014	0.0156972	0.028367
ENSG00000188910	1661.59	791.778	0.476518	-1.0694	4.24062e-55	1.19208e-53
ENSG00000159640	103.523	49.4188	0.477368	-1.06682	0.00101009	0.00221628
ENSG00000068831	209.71	100.225	0.477924	-1.06515	5.17953e-07	1.62981e-06
ENSG00000131471	475.153	227.559	0.478917	-1.06215	2.17252e-15	1.28065e-14
ENSG00000117480	179.694	86.1658	0.479515	-1.06035	5.22135e-06	1.4894e-05
ENSG00000214357	1201.79	576.419	0.479634	-1.05999	2.81571e-17	1.83953e-16
ENSG00000149451	163.945	78.6798	0.479916	-1.05915	1.61321e-05	4.38635e-05
ENSG00000162975	55.3592	26.5774	0.480089	-1.05863	0.0256897	0.0445269
ENSG00000137404	997.513	479.67	0.480866	-1.05629	2.6608e-17	1.73978e-16
ENSG00000141505	60.9362	29.3114	0.481019	-1.05583	0.0182879	0.0326657
ENSG00000100167	1899.58	914.018	0.481169	-1.05539	1.1223e-60	3.69065e-59
ENSG00000100505	342.909	165.263	0.481944	-1.05306	5.04612e-11	2.20729e-10
ENSG00000164849	57.8616	27.9381	0.482844	-1.05037	0.0224457	0.0394271
ENSG00000188859	64.7236	31.3007	0.483606	-1.0481	0.0149356	0.0270718
ENSG00000142583	68.3183	33.0679	0.484028	-1.04684	0.011778	0.0217968
ENSG00000186792	1439.49	697.512	0.484554	-1.04527	7.16236e-30	8.74991e-29
ENSG00000143742	28895.6	14002.9	0.484603	-1.04512	2.40947e-215	9.94603e-213
ENSG00000116396	2486.28	1207.27	0.485574	-1.04224	1.92268e-74	9.42475e-73
ENSG00000117643	223.231	108.407	0.485628	-1.04208	3.02567e-07	9.70764e-07
ENSG00000109099	15020.3	7304.71	0.486321	-1.04002	1.61667e-156	3.72928e-154
ENSG00000167703	1528.04	743.627	0.486654	-1.03903	1.02224e-48	2.41127e-47
ENSG00000182742	395.427	192.533	0.4869	-1.0383	2.04884e-12	9.86132e-12
ENSG00000139289	4366.37	2128.01	0.487364	-1.03693	2.44667e-111	2.59314e-109
ENSG00000072571	9209.99	4491.79	0.487708	-1.03591	3.29905e-125	4.34864e-123
ENSG00000112276	886.157	432.188	0.487711	-1.0359	1.45882e-28	1.67397e-27
ENSG00000197457	265.349	129.551	0.48823	-1.03437	2.26144e-08	8.05656e-08
ENSG00000104765	3795.85	1853.83	0.488383	-1.03392	5.32798e-47	1.17711e-45
ENSG00000143494	765.472	374.138	0.488767	-1.03278	2.55009e-24	2.40678e-23
ENSG00000197768	75.1856	36.8091	0.489576	-1.03039	0.00848506	0.0160725
ENSG00000206289	324.578	159.328	0.490876	-1.02657	8.54694e-06	2.39022e-05
ENSG00000124143	101.274	49.7403	0.491145	-1.02578	0.00170437	0.00362189
ENSG00000121101	58.8779	28.9516	0.491723	-1.02408	0.0240751	0.0420116
ENSG00000136352	427.432	210.345	0.492114	-1.02294	4.06986e-13	2.06468e-12
ENSG00000187867	960.461	472.703	0.492162	-1.02279	1.88508e-30	2.36744e-29
ENSG00000154127	3648.01	1795.88	0.492291	-1.02242	6.40999e-44	1.29571e-42
ENSG00000183496	176.372	86.9235	0.492842	-1.0208	1.22696e-05	3.3783e-05
ENSG00000176909	71.926	35.4567	0.492961	-1.02045	0.0109947	0.0204494
ENSG00000235956	67.7122	33.3838	0.493026	-1.02026	0.0143959	0.0261904
ENSG00000238056	67.7122	33.3838	0.493026	-1.02026	0.0143959	0.0261904
ENSG00000080031	815.383	402.234	0.493307	-1.01944	2.9918e-15	1.74848e-14
ENSG00000131187	3577.27	1766.7	0.493867	-1.0178	5.78602e-94	4.47091e-92
ENSG00000114737	531.341	262.423	0.493888	-1.01774	3.69023e-16	2.27356e-15
ENSG00000213190	2319.48	1146.41	0.494254	-1.01668	1.85222e-67	7.2817e-66
ENSG00000185818	3200.88	1583.84	0.494813	-1.01504	2.70613e-86	1.71163e-84
ENSG00000143382	2246.7	1111.71	0.494817	-1.01503	5.27567e-59	1.64521e-57
ENSG00000138080	156.964	77.6817	0.494902	-1.01479	5.11695e-05	0.000132085
ENSG00000205981	2945.69	1458.27	0.495051	-1.01435	3.97735e-81	2.26046e-79
ENSG00000131378	94.1576	46.6739	0.4957	-1.01246	0.00579261	0.0113112
ENSG00000231274	62.4464	30.9755	0.496033	-1.01149	0.0207179	0.0366011
ENSG00000128973	8140.6	4039.14	0.496172	-1.01109	9.35451e-151	2.09621e-148
ENSG00000052344	144.131	71.5811	0.496638	-1.00973	0.000123492	0.000305777
ENSG00000175170	212.123	105.365	0.496715	-1.00951	1.28473e-06	3.89944e-06
ENSG00000244274	8804.39	4377.1	0.49715	-1.00825	7.3041e-87	4.7149e-85
ENSG00000197168	84.3202	41.9296	0.497266	-1.00791	0.00560379	0.0109753
ENSG00000140323	371.057	184.616	0.497541	-1.00711	3.8654e-11	1.7046e-10
ENSG00000181104	554.717	276.052	0.497645	-1.00681	5.02514e-13	2.53536e-12
ENSG00000161405	197.515	98.439	0.498386	-1.00466	3.96009e-06	1.14545e-05
ENSG00000197296	2689.31	1344.39	0.499902	-1.00028	7.19502e-74	3.45141e-72
ENSG00000163297	212.805	425.689	2.00037	1.00026	1.14357e-12	5.62323e-12
ENSG00000185088	7436.67	14876.5	2.00042	1.0003	2.2968e-118	2.77135e-116
ENSG00000049130	7043.39	14107.3	2.00291	1.0021	1.44343e-178	4.71702e-176
ENSG00000249624	169.899	340.532	2.00432	1.00312	3.13507e-10	1.29857e-09
ENSG00000163959	178.675	358.592	2.00696	1.00501	8.70576e-11	3.74852e-10
ENSG00000173530	1786.86	3595.7	2.01231	1.00885	2.29244e-32	3.12961e-31
ENSG00000140961	796.328	1603.76	2.01395	1.01003	9.93625e-49	2.35083e-47
ENSG00000248592	94.7676	191.019	2.01566	1.01125	0.000410168	0.000950915
ENSG00000172738	100.001	201.744	2.01743	1.01252	2.36866e-06	6.99057e-06
ENSG00000166147	5504.24	11127.2	2.02157	1.01547	1.36666e-27	1.50123e-26
ENSG00000178980	9456.73	19138.6	2.02381	1.01707	6.06679e-167	1.64075e-164
ENSG00000185532	47.4784	96.0988	2.02405	1.01725	0.0024919	0.00516764
ENSG00000258589	35.5226	71.9424	2.02526	1.01811	0.0109546	0.0203836
ENSG00000139278	1491.55	3022.5	2.02642	1.01893	3.88922e-50	9.72988e-49
ENSG00000164683	121.347	247.047	2.03588	1.02565	7.66786e-08	2.60568e-07
ENSG00000176697	963.464	1962.68	2.03711	1.02653	8.82562e-55	2.47654e-53
ENSG00000135049	3017.15	6146.61	2.03722	1.0266	2.52883e-135	4.40746e-133
ENSG00000183091	237.16	483.499	2.03871	1.02765	0.00598225	0.0116554
ENSG00000138829	8000.09	16332.6	2.04155	1.02966	3.20707e-63	1.1204e-61
ENSG00000111341	305.421	623.753	2.04227	1.03018	1.6224e-19	1.20212e-18
ENSG00000168702	2788.38	5696.2	2.04283	1.03057	2.77377e-29	3.29616e-28
ENSG00000138653	454.537	928.738	2.04326	1.03088	7.62861e-30	9.305e-29
ENSG00000145506	2593.37	5302.98	2.04482	1.03198	2.60302e-125	3.46025e-123
ENSG00000139174	170.296	348.344	2.04552	1.03247	6.43255e-11	2.79195e-10
ENSG00000187720	235.214	481.872	2.04865	1.03468	4.65743e-15	2.68787e-14
ENSG00000131152	171.968	353.006	2.05274	1.03755	3.72215e-11	1.64467e-10
ENSG00000084110	26.7022	54.8888	2.05559	1.03955	0.0283601	0.0487674
ENSG00000163513	2074.64	4265.6	2.05607	1.03989	3.80251e-75	1.90563e-73
ENSG00000197142	93.7684	192.887	2.05706	1.04058	2.64656e-06	7.78289e-06
ENSG00000141933	532.596	1096.24	2.0583	1.04145	1.01432e-11	4.66449e-11
ENSG00000107485	955.24	1971.47	2.06385	1.04534	7.82309e-62	2.63899e-60
ENSG00000013288	4081.4	8444.03	2.06891	1.04887	4.47222e-164	1.13147e-161
ENSG00000225614	170.869	353.659	2.06977	1.04947	2.39518e-11	1.07459e-10
ENSG00000084453	192.444	399.137	2.07405	1.05245	7.72085e-13	3.83865e-12
ENSG00000127415	1144.04	2377.7	2.07833	1.05542	1.33867e-73	6.3058e-72
ENSG00000113532	56.7188	117.913	2.0789	1.05582	0.000398703	0.000926389
ENSG00000213366	77.0695	160.223	2.07894	1.05585	2.19277e-05	5.87059e-05
ENSG00000249967	27.6891	57.5752	2.07935	1.05613	0.0219636	0.038645
ENSG00000164129	47.5357	98.8665	2.07983	1.05647	0.00148146	0.00317679
ENSG00000124406	1163.3	2419.57	2.07992	1.05653	3.43785e-73	1.59074e-71
ENSG00000171992	8203.22	17063	2.08003	1.05661	2.15585e-179	7.19503e-177
ENSG00000136542	1035.77	2155.3	2.08087	1.05719	5.09187e-68	2.05324e-66
ENSG00000141295	1782.22	3722.06	2.08844	1.06242	3.20319e-39	5.65189e-38
ENSG00000131409	31.2596	65.3832	2.09162	1.06462	0.0126636	0.023301
ENSG00000259956	177.278	371.947	2.0981	1.06908	0.000202834	0.000489862
ENSG00000162078	65.6536	137.754	2.0982	1.06915	0.00337412	0.00683804
ENSG00000006756	734.162	1540.97	2.09895	1.06967	1.1343e-51	2.95558e-50
ENSG00000262621	169.027	354.844	2.09933	1.06993	0.00119476	0.00259678
ENSG00000154309	1317.33	2769.31	2.10221	1.07191	7.43699e-64	2.66339e-62
ENSG00000174332	30.5923	64.44	2.10642	1.07479	0.0129656	0.0238009
ENSG00000255073	86.0384	181.27	2.10684	1.07508	0.00255569	0.00528524
ENSG00000102359	79.6396	168.324	2.11358	1.07969	8.42113e-06	2.35756e-05
ENSG00000174808	169.235	357.837	2.11444	1.08028	5.77961e-12	2.70624e-11
ENSG00000067715	38.4095	81.4316	2.12009	1.08413	0.00387219	0.00777411
ENSG00000152926	131.915	280.179	2.12393	1.08673	1.68317e-09	6.5612e-09
ENSG00000160211	18163.1	38624.7	2.12655	1.08851	1.47208e-130	2.19915e-128
ENSG00000141639	921.972	1961.54	2.12755	1.08919	5.65688e-66	2.15373e-64
ENSG00000181722	757.594	1612.61	2.12859	1.0899	1.40678e-55	4.05639e-54
ENSG00000179399	190.486	406.581	2.13444	1.09386	7.57047e-14	4.02135e-13
ENSG00000152936	31.6184	67.8444	2.14573	1.10147	0.00874595	0.0165129
ENSG00000137752	211.11	453.224	2.14686	1.10223	1.41299e-15	8.40823e-15
ENSG00000269028	30.9015	66.4196	2.14939	1.10393	0.00961	0.0180271
ENSG00000197766	4032.86	8670.24	2.1499	1.10427	3.57027e-28	4.01745e-27
ENSG00000135373	62.0869	133.513	2.15043	1.10462	0.00282959	0.00581107
ENSG00000197321	5481.19	11797.1	2.1523	1.10588	5.72635e-126	7.87925e-124
ENSG00000205363	78.6222	169.379	2.15433	1.10724	1.22391e-05	3.37106e-05
ENSG00000237412	422.294	910.537	2.15617	1.10847	3.44016e-27	3.73183e-26
ENSG00000138271	249.344	538.549	2.15986	1.11094	8.61371e-19	6.15276e-18
ENSG00000106258	162.733	351.516	2.16008	1.11108	1.84854e-06	5.50893e-06
ENSG00000106034	132.095	285.552	2.16173	1.11218	2.86886e-07	9.22152e-07
ENSG00000149571	175.455	379.847	2.16492	1.11431	5.31116e-11	2.31676e-10
ENSG00000115295	1235.08	2675.89	2.16657	1.11541	9.04032e-89	6.1655e-87
ENSG00000168000	979.715	2124.12	2.16809	1.11643	5.28914e-30	6.50709e-29
ENSG00000108602	688.602	1506.79	2.18819	1.12973	2.47211e-55	7.03765e-54
ENSG00000111912	6250.37	13693.9	2.1909	1.13152	1.42777e-97	1.17873e-95
ENSG00000065325	5746.98	12595.2	2.19162	1.132	3.83416e-217	1.62548e-214
ENSG00000183690	27.6702	60.6719	2.19268	1.1327	0.0123227	0.0227137
ENSG00000128510	32782	71882.7	2.19275	1.13274	2.06218e-239	1.15526e-236
ENSG00000182585	839.724	1842.27	2.1939	1.1335	3.36708e-63	1.17369e-61
ENSG00000221926	6388.01	14063.5	2.20155	1.13852	3.19073e-226	1.51837e-223
ENSG00000198732	12525.7	27662.8	2.20847	1.14305	4.26142e-255	2.67378e-252
ENSG00000197565	2921.52	6473.5	2.2158	1.14782	4.30649e-136	7.59007e-134
ENSG00000078114	1388.32	3077.07	2.2164	1.14822	2.13309e-102	1.99164e-100
ENSG00000206488	135.684	300.909	2.21772	1.14908	5.1843e-11	2.26269e-10
ENSG00000229061	135.684	300.909	2.21772	1.14908	5.1843e-11	2.26269e-10
ENSG00000234549	135.684	300.909	2.21772	1.14908	5.1843e-11	2.26269e-10
ENSG00000135905	49.084	108.957	2.2198	1.15043	0.000488304	0.00111916
ENSG00000069702	5373.37	11933.6	2.22088	1.15113	2.25598e-157	5.36172e-155
ENSG00000175899	2230.59	4961.57	2.22433	1.15337	1.73604e-80	9.72555e-79
ENSG00000170667	142.515	318.224	2.23292	1.15893	0.0204985	0.0362706
ENSG00000148450	895.481	2001.15	2.23472	1.16009	1.16006e-33	1.67096e-32
ENSG00000158639	73.9546	165.311	2.2353	1.16047	2.79979e-06	8.21657e-06
ENSG00000114251	4411.99	9864.91	2.23593	1.16087	1.87382e-157	4.52195e-155
ENSG00000083123	1861.49	4168.4	2.23928	1.16304	4.54187e-132	7.05383e-130
ENSG00000125657	4433.85	9929.99	2.23959	1.16323	8.66291e-58	2.6132e-56
ENSG00000169435	229.444	514.261	2.24133	1.16436	3.1301e-19	2.28367e-18
ENSG00000256566	21.4501	48.3473	2.25395	1.17245	0.0252369	0.0438148
ENSG00000125954	268.697	605.824	2.25468	1.17292	1.53192e-05	4.18126e-05
ENSG00000064205	3704.02	8352.19	2.2549	1.17306	1.3062e-97	1.08408e-95
ENSG00000187372	27.3318	61.686	2.25693	1.17436	0.00923362	0.0173709
ENSG00000105499	101.552	229.36	2.25856	1.1754	0.000532102	0.00121263
ENSG00000120211	202.765	459.218	2.26478	1.17937	1.82368e-17	1.20447e-16
ENSG00000213999	125.029	283.764	2.26958	1.18243	0.00245052	0.00509056
ENSG00000169085	28.3594	64.3645	2.2696	1.18244	0.00704193	0.0135367
ENSG00000256618	300.078	681.871	2.27232	1.18416	1.27974e-26	1.35544e-25
ENSG00000111961	21.4276	48.7384	2.27456	1.18559	0.0235878	0.0412254
ENSG00000112297	264.771	602.878	2.27698	1.18712	2.2746e-23	2.03649e-22
ENSG00000105143	22.7215	51.8001	2.27978	1.1889	0.0184872	0.0329846
ENSG00000244486	114.961	262.108	2.27997	1.18901	4.30141e-10	1.76259e-09
ENSG00000166750	819.858	1869.67	2.28048	1.18934	3.50668e-73	1.61782e-71
ENSG00000138483	83.6127	191.15	2.28614	1.19292	1.78173e-07	5.84446e-07
ENSG00000075461	26.1584	59.9836	2.29309	1.19729	0.00894853	0.0168669
ENSG00000073849	459.296	1054.12	2.29507	1.19854	3.96214e-43	7.82747e-42
ENSG00000255663	49.3842	113.523	2.29877	1.20086	0.00694064	0.0133584
ENSG00000136999	889.706	2047.78	2.30164	1.20266	7.80098e-68	3.12158e-66
ENSG00000110375	29.8976	68.835	2.30236	1.20311	0.00458061	0.00909627
ENSG00000144460	156.637	360.806	2.30346	1.2038	3.76944e-14	2.04735e-13
ENSG00000163898	519.311	1196.41	2.30385	1.20404	1.96113e-49	4.71091e-48
ENSG00000181444	1073.53	2477.95	2.30823	1.20679	3.07181e-95	2.43355e-93
ENSG00000179869	23.7479	54.8883	2.31129	1.2087	0.0131608	0.024131
ENSG00000159167	443.738	1026.69	2.31372	1.21021	6.9617e-30	8.51139e-29
ENSG00000080546	1604.69	3713.74	2.31431	1.21058	2.10499e-130	3.11498e-128
ENSG00000170965	72.2122	167.354	2.31753	1.21259	1.04919e-06	3.21374e-06
ENSG00000091129	665.008	1542.1	2.31892	1.21345	1.82624e-63	6.43738e-62
ENSG00000164176	164.69	382.174	2.32057	1.21448	1.87714e-09	7.28831e-09
ENSG00000156103	55.3534	128.574	2.32279	1.21586	2.95096e-05	7.79011e-05
ENSG00000053747	145.885	339.675	2.32836	1.21932	1.45356e-13	7.57746e-13
ENSG00000152580	994.728	2316.97	2.32925	1.21986	1.96085e-60	6.4079e-59
ENSG00000183785	104.529	244.445	2.33853	1.2256	6.35107e-10	2.5676e-09
ENSG00000070915	8088.42	18938.3	2.34141	1.22738	6.65101e-278	5.21638e-275
ENSG00000058404	27.6274	64.7836	2.3449	1.22953	0.00544377	0.0106765
ENSG00000137809	120.084	282.462	2.3522	1.23401	1.89962e-11	8.58221e-11
ENSG00000150687	12419.9	29311.1	2.36001	1.23879	2.04892e-298	1.78552e-295
ENSG00000267228	1702.49	4021.72	2.36226	1.24017	3.28015e-129	4.80865e-127
ENSG00000183671	470.151	1112.11	2.36542	1.2421	3.37035e-48	7.79754e-47
ENSG00000168079	4378.53	10383.5	2.37146	1.24577	8.17744e-243	4.75079e-240
ENSG00000163491	296.64	704.353	2.37444	1.24758	8.17979e-30	9.96956e-29
ENSG00000184226	220.145	522.77	2.37466	1.24772	9.96364e-22	8.23444e-21
ENSG00000154122	4906.53	11654.4	2.37529	1.2481	1.60727e-167	4.50207e-165
ENSG00000106018	1159.02	2757.71	2.37935	1.25057	3.03471e-110	3.1735e-108
ENSG00000168685	125.254	298.145	2.38032	1.25116	2.56758e-12	1.22753e-11
ENSG00000053108	152.217	362.339	2.3804	1.25121	5.55912e-15	3.18715e-14
ENSG00000118849	95.6868	228.702	2.3901	1.25707	1.34569e-09	5.30097e-09
ENSG00000144642	128.19	308.147	2.40384	1.26534	6.25216e-13	3.13527e-12
ENSG00000125398	31.5449	75.9635	2.40811	1.2679	0.00166562	0.00354311
ENSG00000139985	85.2072	205.49	2.41165	1.27002	1.00306e-08	3.68046e-08
ENSG00000158486	49.4446	119.263	2.41204	1.27026	3.54256e-05	9.27379e-05
ENSG00000151365	112.663	273.36	2.42635	1.27879	1.1876e-11	5.42954e-11
ENSG00000163219	21.1805	51.4799	2.43053	1.28127	0.0123195	0.0227137
ENSG00000187601	26.055	63.3286	2.43057	1.2813	0.0044401	0.00884074
ENSG00000163017	56.9397	138.711	2.43609	1.28457	4.87076e-06	1.39523e-05
ENSG00000113742	1340.32	3284.56	2.45057	1.29312	2.65492e-133	4.47797e-131
ENSG00000122861	32.2064	79.1194	2.45664	1.29668	0.00104525	0.00228863
ENSG00000069535	233.998	574.902	2.45687	1.29682	2.07739e-25	2.05979e-24
ENSG00000109321	435.074	1072.37	2.46479	1.30146	5.8558e-50	1.43747e-48
ENSG00000091592	6844.21	16918.7	2.47197	1.30566	4.45706e-223	2.05628e-220
ENSG00000133710	10001.2	24757.4	2.47544	1.30768	1.35092e-139	2.52268e-137
ENSG00000049192	108.683	269.186	2.4768	1.30848	7.66496e-12	3.55507e-11
ENSG00000196878	4076.01	10121.3	2.48314	1.31217	1.10533e-218	4.81617e-216
ENSG00000125726	1757.43	4370.43	2.48683	1.31431	5.1781e-168	1.50414e-165
ENSG00000120885	81531.1	203163	2.49184	1.31721	3.82755e-234	2.07031e-231
ENSG00000176771	547.714	1366.3	2.49454	1.31877	8.4697e-65	3.11868e-63
ENSG00000186567	141.187	352.419	2.49612	1.31969	9.60683e-16	5.79142e-15
ENSG00000213809	105.137	262.758	2.4992	1.32147	7.22401e-12	3.35552e-11
ENSG00000164708	21.5208	53.8827	2.50375	1.32409	0.008201	0.0155834
ENSG00000123700	38.0572	95.7833	2.51683	1.33161	0.000169663	0.000413507
ENSG00000172020	39.7328	100.218	2.52231	1.33475	0.000105997	0.00026421
ENSG00000273047	66.4984	169.249	2.54515	1.34775	0.00139217	0.00299597
ENSG00000257184	121.613	310.367	2.55209	1.35168	2.59368e-14	1.42403e-13
ENSG00000113248	44.2677	113.19	2.55694	1.35442	2.47016e-05	6.58178e-05
ENSG00000240583	18.2316	46.981	2.57691	1.36564	0.0127438	0.0234432
ENSG00000188659	24.743	63.7775	2.57759	1.36602	0.00269841	0.00555986
ENSG00000198270	693.409	1791.81	2.58406	1.36964	1.72368e-88	1.16542e-86
ENSG00000086717	245.241	634.198	2.58602	1.37073	1.20747e-30	1.52992e-29
ENSG00000244242	57.6498	149.245	2.58882	1.3723	4.67273e-07	1.47685e-06
ENSG00000023839	302.535	783.896	2.59109	1.37356	9.22903e-39	1.5961e-37
ENSG00000133466	3806.24	9867.95	2.59257	1.37438	4.19284e-284	3.46152e-281
ENSG00000107295	1504.78	3902.45	2.59336	1.37482	1.82945e-167	5.03452e-165
ENSG00000166546	18.495	48.0366	2.59728	1.377	0.0113512	0.0210666
ENSG00000115596	196.948	514.538	2.61256	1.38547	2.43075e-17	1.59401e-16
ENSG00000114541	194.62	508.983	2.61526	1.38695	9.81659e-25	9.47588e-24
ENSG00000054277	1779.38	4657.56	2.61751	1.3882	1.75782e-192	6.41237e-190
ENSG00000165617	116.213	308.02	2.65049	1.40626	4.76479e-15	2.74781e-14
ENSG00000153558	525.914	1397.36	2.65701	1.40981	8.44637e-64	3.01799e-62
ENSG00000151617	88.7881	236.946	2.66867	1.41612	1.06643e-11	4.89266e-11
ENSG00000157445	1093.58	2932.74	2.68178	1.42319	3.48677e-143	7.00233e-141
ENSG00000154438	43.5939	117.223	2.68898	1.42706	7.16535e-06	2.0226e-05
ENSG00000251537	28.0003	75.3479	2.69097	1.42812	0.000581653	0.0013179
ENSG00000171931	71.9125	194.221	2.7008	1.43339	1.0559e-09	4.20057e-09
ENSG00000113296	21.8054	58.9216	2.70216	1.43411	0.00294192	0.0060233
ENSG00000107902	817.143	2259.73	2.7654	1.46749	2.43603e-121	3.00879e-119
ENSG00000131095	15.3691	42.6385	2.7743	1.47212	0.0258541	0.0447773
ENSG00000179046	959.989	2664.07	2.77511	1.47254	3.2129e-140	6.29969e-138
ENSG00000198125	16.6262	46.3524	2.78791	1.47918	0.00852447	0.0161355
ENSG00000213015	1228.3	3429.58	2.79215	1.48138	5.01428e-70	2.13734e-68
ENSG00000176927	37.0172	103.528	2.79676	1.48376	0.000104265	0.000260098
ENSG00000164741	55.0746	154.1	2.79802	1.48441	4.71312e-08	1.63779e-07
ENSG00000108846	1029.74	2895.74	2.81211	1.49165	4.11965e-153	9.36533e-151
ENSG00000120471	19.8103	55.8473	2.8191	1.49524	0.00299757	0.00612477
ENSG00000140839	24.469	69.2237	2.82903	1.50031	0.000669623	0.00150418
ENSG00000114812	1154.95	3274.46	2.83515	1.50342	6.90424e-114	7.68085e-112
ENSG00000153294	23.0952	65.7644	2.84754	1.50972	0.00094206	0.00207544
ENSG00000164418	56.6292	162.547	2.87038	1.52124	9.27123e-09	3.41061e-08
ENSG00000206075	1927.18	5554.12	2.88199	1.52706	1.83284e-131	2.79529e-129
ENSG00000168874	193	561.874	2.91127	1.54165	4.63715e-32	6.249e-31
ENSG00000146477	129.007	376.468	2.9182	1.54508	3.23763e-21	2.61511e-20
ENSG00000114200	20.1741	59.2734	2.9381	1.55488	0.00148581	0.00318523
ENSG00000164938	225.236	662.801	2.9427	1.55714	6.80297e-39	1.17913e-37
ENSG00000177138	12.0281	35.4516	2.94741	1.55945	0.0206937	0.0365707
ENSG00000196562	89.2119	263.737	2.9563	1.56379	2.9292e-14	1.60375e-13
ENSG00000001626	17.5416	52.0632	2.96798	1.56948	0.00392328	0.00786661
ENSG00000165124	311.637	926.046	2.97155	1.57122	1.41189e-42	2.75459e-41
ENSG00000250722	1763.8	5259.05	2.98166	1.57612	4.97988e-258	3.25477e-255
ENSG00000041515	239.135	713.127	2.98211	1.57633	6.66112e-24	6.15712e-23
ENSG00000204174	15.3671	45.9638	2.99105	1.58065	0.00972736	0.0182342
ENSG00000133067	38.0876	116.159	3.04979	1.60871	9.47392e-07	2.91445e-06
ENSG00000153714	179.514	549.311	3.05999	1.61353	2.81127e-33	3.97992e-32
ENSG00000171451	2344.53	7188.1	3.0659	1.61631	0	0
ENSG00000262102	2344.53	7188.1	3.0659	1.61631	0	0
ENSG00000079215	2416.52	7419.65	3.07038	1.61842	1.39485e-144	2.91728e-142
ENSG00000176746	51.446	158.481	3.08053	1.62318	2.73591e-09	1.04851e-08
ENSG00000128218	18.2492	56.2925	3.08466	1.62511	0.00145132	0.00311634
ENSG00000075223	4036.93	12478.6	3.09111	1.62813	0	0
ENSG00000235109	722.804	2244.94	3.10588	1.635	3.52661e-143	7.00233e-141
ENSG00000164120	95.015	295.218	3.10707	1.63555	8.74226e-18	5.90065e-17
ENSG00000100292	2669.19	8302.99	3.11068	1.63723	0	0
ENSG00000127324	3599.95	11227.7	3.11883	1.64101	1.14418e-228	5.78956e-226
ENSG00000120327	42.2874	132.24	3.12718	1.64486	7.26845e-08	2.48016e-07
ENSG00000147041	59.8839	188.07	3.14057	1.65103	2.49635e-11	1.11911e-10
ENSG00000075826	570.626	1802.44	3.15871	1.65933	2.24413e-120	2.75012e-118
ENSG00000108448	3823.44	12107.8	3.16674	1.663	0	0
ENSG00000254806	24.0453	76.215	3.16964	1.66432	0.0215163	0.0378836
ENSG00000168743	30.9332	99.1515	3.20534	1.68048	4.09156e-06	1.1813e-05
ENSG00000172667	1279.11	4111.64	3.21446	1.68458	5.71743e-243	3.44937e-240
ENSG00000115221	127.978	412.33	3.22189	1.68791	1.87343e-26	1.96041e-25
ENSG00000268744	19.5229	63.119	3.23307	1.69291	0.00095708	0.00210617
ENSG00000148541	25.038	81.4606	3.25348	1.70198	3.69085e-05	9.64429e-05
ENSG00000205403	62.1994	202.398	3.25402	1.70222	9.47938e-13	4.69361e-12
ENSG00000183346	14.2985	46.6907	3.26544	1.70728	0.00324663	0.00659501
ENSG00000267618	31.7195	104.822	3.30467	1.7245	0.0244171	0.0425448
ENSG00000105855	669.151	2235.1	3.34021	1.73994	3.55874e-157	8.33169e-155
ENSG00000188710	11.4116	38.1646	3.34438	1.74174	0.00820304	0.0155854
ENSG00000184588	107.092	358.762	3.35005	1.74418	6.38214e-24	5.90273e-23
ENSG00000258588	74.9019	252.524	3.3714	1.75335	5.29756e-05	0.000136472
ENSG00000269905	74.3097	251.262	3.38128	1.75757	2.22088e-14	1.22665e-13
ENSG00000204540	29.6245	100.295	3.38553	1.75938	0.000274868	0.000651886
ENSG00000162645	410.43	1390.39	3.38766	1.76029	3.11048e-99	2.71061e-97
ENSG00000147576	91.0999	309.851	3.40122	1.76605	8.04972e-21	6.38039e-20
ENSG00000162595	105.709	361.412	3.41892	1.77354	3.239e-22	2.72862e-21
ENSG00000146674	11992.2	41136.4	3.43027	1.77832	0	0
ENSG00000117009	431.506	1499.98	3.47614	1.79749	2.3667e-114	2.67079e-112
ENSG00000205978	12.4205	43.9763	3.54061	1.824	0.00790844	0.0150695
ENSG00000198865	281.788	1019.29	3.61723	1.85489	1.1822e-80	6.64657e-79
ENSG00000125845	122.052	448.08	3.67123	1.87626	1.57637e-33	2.2623e-32
ENSG00000171786	21.8021	81.0719	3.71854	1.89473	8.10182e-06	2.27344e-05
ENSG00000137573	46.8662	175.108	3.73633	1.90162	1.20131e-12	5.89051e-12
ENSG00000168899	141.806	530.984	3.74443	1.90475	6.15418e-41	1.14785e-39
ENSG00000057657	82.4338	310.127	3.76213	1.91155	2.73331e-23	2.43745e-22
ENSG00000138356	42.9545	162.861	3.79149	1.92276	6.99515e-12	3.25307e-11
ENSG00000206458	15.0361	57.2719	3.80895	1.92939	0.00240364	0.00499848
ENSG00000158055	13.3375	52.1444	3.9096	1.96702	0.000457835	0.00105395
ENSG00000118777	238.513	933.529	3.91395	1.96863	1.03157e-79	5.63804e-78
ENSG00000077800	23.4686	92.3629	3.9356	1.97658	6.28234e-07	1.96539e-06
ENSG00000254979	64.7036	260.088	4.01968	2.00708	4.79999e-16	2.93767e-15
ENSG00000111291	14.2751	57.9332	4.05835	2.02089	0.000141084	0.000346873
ENSG00000235487	7.78849	31.6447	4.06301	2.02255	0.00878226	0.0165794
ENSG00000181690	9.9922	41.5674	4.15999	2.05658	0.0017447	0.00369829
ENSG00000138378	11.0714	46.3403	4.18559	2.06543	0.000726202	0.00162476
ENSG00000170468	14.3817	60.3504	4.19634	2.06913	0.00403992	0.00808101
ENSG00000145242	156.839	665.397	4.24254	2.08493	2.76516e-59	8.70968e-58
ENSG00000104081	15.04	64.0341	4.2576	2.09004	3.08819e-05	8.13185e-05
ENSG00000264187	12.9697	55.4501	4.27537	2.09605	0.00423844	0.00845854
ENSG00000231738	8.82512	38.1829	4.32661	2.11324	0.0022712	0.00473939
ENSG00000204397	48.8704	213.089	4.3603	2.12443	5.0178e-18	3.4281e-17
ENSG00000196569	40.9908	180.582	4.40544	2.13928	3.37801e-15	1.96541e-14
ENSG00000166257	17.1876	76.0647	4.42556	2.14586	0.000107615	0.000267818
ENSG00000139155	31.5404	144.139	4.56999	2.19219	2.53776e-12	1.21364e-11
ENSG00000117228	117.425	536.638	4.57003	2.1922	5.34141e-39	9.31985e-38
ENSG00000164266	6.51174	29.9732	4.60294	2.20256	0.00703007	0.0135172
ENSG00000223618	34.0053	160.37	4.71604	2.23758	0.00178643	0.00378012
ENSG00000154734	7.85065	37.1576	4.73306	2.24277	0.0017368	0.00368353
ENSG00000254995	76.2261	362.467	4.75516	2.24949	1.0098e-15	6.08049e-15
ENSG00000135919	446.454	2130.01	4.77095	2.25428	1.44944e-45	3.08074e-44
ENSG00000091428	8.50309	40.8731	4.80685	2.26509	0.000812111	0.00180564
ENSG00000169429	9.41698	45.3212	4.81271	2.26685	0.000374667	0.000873258
ENSG00000137440	525.818	2614.12	4.97153	2.31369	2.26032e-175	6.95202e-173
ENSG00000255339	68.4252	341.473	4.99045	2.31917	1.70819e-33	2.447e-32
ENSG00000114805	6.53712	32.7119	5.00402	2.32309	0.00304219	0.00620544
ENSG00000255633	4.53524	22.8526	5.03889	2.33311	0.0194748	0.0346016
ENSG00000109205	12.3323	63.0099	5.10934	2.35314	7.83866e-06	2.2021e-05
ENSG00000187848	4.57955	23.5092	5.13351	2.35995	0.0157715	0.0284817
ENSG00000155816	5.55656	29.3325	5.27889	2.40024	0.00470466	0.00932844
ENSG00000101049	4.90666	26.2208	5.34393	2.4179	0.008227	0.015629
ENSG00000185942	4.83494	26.568	5.49501	2.45812	0.00744051	0.0142384
ENSG00000170523	7.19084	39.5399	5.49865	2.45908	0.000519581	0.00118634
ENSG00000105146	13.3498	74.648	5.59168	2.48328	2.63477e-07	8.50391e-07
ENSG00000272896	8.79373	49.7425	5.65659	2.49993	9.75761e-05	0.000244034
ENSG00000163157	5.47959	31.6615	5.77807	2.53059	0.00220398	0.0046077
ENSG00000204291	573.288	3340.38	5.8267	2.54268	0	0
ENSG00000142513	3.59821	21.4713	5.96721	2.57706	0.0158976	0.0286896
ENSG00000204653	29.9484	182.986	6.11003	2.61118	8.27484e-20	6.25237e-19
ENSG00000254732	5.18595	31.9979	6.1701	2.62529	0.00153247	0.00327854
ENSG00000179242	10.1404	63.0579	6.21847	2.63656	1.23676e-06	3.75892e-06
ENSG00000148677	25.4136	158.16	6.22341	2.63771	4.10253e-17	2.65699e-16
ENSG00000198774	5.84267	37.1562	6.35947	2.66891	0.000434054	0.00100288
ENSG00000188897	19.7625	129.494	6.55251	2.71205	3.29589e-14	1.79761e-13
ENSG00000213931	12.9945	86.212	6.63448	2.72998	2.22803e-09	8.58696e-09
ENSG00000109511	9.11606	63.0168	6.91273	2.78926	5.04291e-07	1.58937e-06
ENSG00000206127	9.47384	67.1494	7.08788	2.82535	1.34952e-07	4.4754e-07
ENSG00000171502	23.0755	174.806	7.5754	2.92132	1.51442e-21	1.23983e-20
ENSG00000130513	594.301	4522.62	7.60998	2.92789	1.92937e-93	1.47629e-91
ENSG00000132821	4.90284	38.4913	7.85081	2.97284	0.000106964	0.000266324
ENSG00000196139	2246.18	18250.6	8.12518	3.0224	0	0
ENSG00000272897	2.2563	19.0994	8.46489	3.08149	0.0128184	0.023572
ENSG00000215262	16.9188	145.944	8.6261	3.10871	5.21454e-19	3.7538e-18
ENSG00000139329	3175.36	27766.8	8.74444	3.12837	2.30924e-272	1.64649e-269
ENSG00000134545	8.45752	74.9766	8.86508	3.14813	1.61975e-09	6.32025e-09
ENSG00000130305	11.776	104.529	8.87646	3.14998	0.000589458	0.00133423
ENSG00000065618	56.296	520.234	9.24104	3.20806	2.02793e-45	4.29286e-44
ENSG00000146166	7.19084	67.1667	9.3406	3.22351	9.71344e-09	3.56827e-08
ENSG00000205221	34.8238	341.5	9.80651	3.29374	8.0128e-52	2.09481e-50
ENSG00000163295	21.1733	213.598	10.0881	3.33458	1.97027e-31	2.56266e-30
ENSG00000187134	721.923	8246.98	11.4236	3.51395	0	0
ENSG00000107165	2.94399	34.0895	11.5793	3.53348	6.41799e-05	0.000163855
ENSG00000164125	11.444	138.325	12.0871	3.5954	3.93568e-21	3.17404e-20
ENSG00000205810	35.8265	502.144	14.016	3.809	6.72113e-93	5.09312e-91
ENSG00000255641	22.8438	353.724	15.4845	3.95275	1.73094e-38	2.97388e-37
ENSG00000000971	17.8773	284.94	15.9386	3.99446	9.68689e-53	2.59741e-51
ENSG00000011465	14.6771	240.177	16.364	4.03246	5.49478e-44	1.11647e-42
ENSG00000078018	59.5964	984.757	16.5238	4.04647	5.98463e-207	2.34687e-204
ENSG00000134215	8.43793	152.669	18.0932	4.17738	2.22911e-27	2.4265e-26
ENSG00000181804	1.96266	36.7717	18.7356	4.22771	3.52839e-06	1.02721e-05
ENSG00000104490	8.50106	163.274	19.2063	4.26351	3.64667e-30	4.52903e-29
ENSG00000168918	5.88341	118.256	20.0999	4.32912	1.97841e-21	1.61548e-20
ENSG00000106541	325.591	6828.96	20.9741	4.39054	0	0
ENSG00000005108	8.17496	182.316	22.3017	4.47908	9.8026e-36	1.5361e-34
ENSG00000149575	1.94832	48.373	24.8281	4.6339	9.16394e-09	3.37273e-08
ENSG00000151632	106.372	3190.36	29.9923	4.90652	0	0
ENSG00000268465	0.654221	21.8806	33.4453	5.06373	0.00383991	0.00771425
ENSG00000205809	2.94399	117.979	40.0744	5.32461	1.93791e-25	1.92637e-24
ENSG00000146374	0	383.692	Inf	Inf	1.54382e-123	1.95293e-121
ENSG00000203618	0	946.715	Inf	Inf	3.95226e-63	1.37462e-61
ENSG00000137975	0	183.007	Inf	Inf	2.10098e-54	5.86404e-53
ENSG00000244694	0	174.459	Inf	Inf	1.44364e-51	3.74916e-50
ENSG00000184564	0	103.921	Inf	Inf	6.23489e-29	7.27141e-28
ENSG00000198074	0	94.3993	Inf	Inf	5.2399e-26	5.36508e-25
ENSG00000187398	0	79.776	Inf	Inf	1.39623e-21	1.14546e-20
ENSG00000100678	0	77.6899	Inf	Inf	5.80408e-21	4.63794e-20
ENSG00000074706	0	58.9524	Inf	Inf	1.81268e-15	1.07378e-14
ENSG00000154263	0	43.6164	Inf	Inf	3.90791e-11	1.72189e-10
ENSG00000100385	0	43.2581	Inf	Inf	4.8891e-11	2.1392e-10
ENSG00000161544	0	39.8726	Inf	Inf	4.17796e-10	1.71424e-09
ENSG00000064787	0	38.8282	Inf	Inf	8.01098e-10	3.21546e-09
ENSG00000116194	0	38.2081	Inf	Inf	1.19835e-09	4.74681e-09
ENSG00000167165	0	38.1838	Inf	Inf	1.21008e-09	4.79207e-09
ENSG00000183542	0	37.4605	Inf	Inf	1.88576e-09	7.31637e-09
ENSG00000171509	0	36.8048	Inf	Inf	2.8591e-09	1.09199e-08
ENSG00000112077	0	35.4567	Inf	Inf	6.66659e-09	2.48154e-08
ENSG00000014257	0	32.4352	Inf	Inf	4.4712e-08	1.55683e-07
ENSG00000112175	0	32.0334	Inf	Inf	5.67794e-08	1.95659e-07
ENSG00000255819	0	30.7044	Inf	Inf	1.31575e-07	4.3708e-07
ENSG00000118785	0	30.6498	Inf	Inf	1.34564e-07	4.46346e-07
ENSG00000260869	0	29.9545	Inf	Inf	5.52705e-07	1.73568e-06
ENSG00000189184	0	27.5816	Inf	Inf	9.02623e-07	2.78164e-06
ENSG00000159784	0	27.2759	Inf	Inf	1.09623e-06	3.34802e-06
ENSG00000158865	0	27.2521	Inf	Inf	1.10681e-06	3.37639e-06
ENSG00000135248	0	35.1538	Inf	Inf	1.22445e-06	3.72368e-06
ENSG00000136928	0	26.5708	Inf	Inf	1.67503e-06	5.01039e-06
ENSG00000138639	0	25.1854	Inf	Inf	3.83293e-06	1.11093e-05
ENSG00000177551	0	24.5521	Inf	Inf	5.64424e-06	1.60594e-05
ENSG00000092607	0	24.5092	Inf	Inf	5.74005e-06	1.63202e-05
ENSG00000126759	0	24.1956	Inf	Inf	6.9523e-06	1.96529e-05
ENSG00000075213	0	23.8335	Inf	Inf	8.57857e-06	2.39863e-05
ENSG00000125551	0	22.8228	Inf	Inf	1.56129e-05	4.25549e-05
ENSG00000168843	0	22.8172	Inf	Inf	1.56469e-05	4.26404e-05
ENSG00000268738	0	20.4368	Inf	Inf	6.30574e-05	0.000161147
ENSG00000152583	0	19.7671	Inf	Inf	9.29301e-05	0.000233232
ENSG00000260170	0	46.539	Inf	Inf	0.000131938	0.000325712
ENSG00000236609	0	18.4031	Inf	Inf	0.000201634	0.000487115
ENSG00000196542	0	17.3891	Inf	Inf	0.000357954	0.000836915
ENSG00000146250	0	16.7008	Inf	Inf	0.000527377	0.00120239
ENSG00000096006	0	15.6859	Inf	Inf	0.000937185	0.00206528
ENSG00000196104	0	15.6695	Inf	Inf	0.000943076	0.00207739
ENSG00000179715	0	15.3149	Inf	Inf	0.00114813	0.00250342
ENSG00000101096	0	30.9021	Inf	Inf	0.00136094	0.00293277
ENSG00000104723	0	25.6282	Inf	Inf	0.00160521	0.00342157
ENSG00000273003	0	29.2742	Inf	Inf	0.00230003	0.00479446
ENSG00000174343	0	13.9471	Inf	Inf	0.00239651	0.00498562
ENSG00000102935	0	18.6854	Inf	Inf	0.00245891	0.00510461
ENSG00000157551	0	18.0022	Inf	Inf	0.00270987	0.00558128
ENSG00000204022	0	17.7699	Inf	Inf	0.00290157	0.00594876
ENSG00000102313	0	16.4096	Inf	Inf	0.00318054	0.0064725
ENSG00000169302	0	21.0513	Inf	Inf	0.00320869	0.00652385
ENSG00000144452	0	20.1544	Inf	Inf	0.00335987	0.00681005
ENSG00000166049	0	15.719	Inf	Inf	0.00363998	0.00734931
ENSG00000248483	0	16.4003	Inf	Inf	0.00373752	0.00752976
ENSG00000073464	0	14.3564	Inf	Inf	0.00388472	0.00779827
ENSG00000115252	0	13.6681	Inf	Inf	0.00471959	0.00935686
ENSG00000165443	0	12.6186	Inf	Inf	0.00490338	0.00969673
ENSG00000165240	0	26.4737	Inf	Inf	0.00500704	0.00987061
ENSG00000197054	0	12.6508	Inf	Inf	0.00522615	0.0102754
ENSG00000214978	0	11.9228	Inf	Inf	0.0072074	0.0138328
ENSG00000165917	0	11.6218	Inf	Inf	0.00850152	0.0160998
ENSG00000148482	0	11.6171	Inf	Inf	0.00851543	0.0161223
ENSG00000163032	0	10.9288	Inf	Inf	0.0121563	0.0224333
ENSG00000142233	0	10.8728	Inf	Inf	0.0124052	0.0228603
ENSG00000163879	0	10.8691	Inf	Inf	0.012422	0.0228887
ENSG00000221845	0	10.5654	Inf	Inf	0.014658	0.0266426
ENSG00000073737	0	10.2182	Inf	Inf	0.0177495	0.031772
ENSG00000178928	0	9.90922	Inf	Inf	0.0211263	0.0372555
ENSG00000269242	0	9.8915	Inf	Inf	0.0212645	0.0374678
ENSG00000113209	0	9.88782	Inf	Inf	0.0212933	0.037512
ENSG00000161180	0	9.85272	Inf	Inf	0.0215698	0.0379692
ENSG00000154269	0	9.57091	Inf	Inf	0.0252125	0.043782
ENSG00000186439	0	9.57091	Inf	Inf	0.0252125	0.043782
ENSG00000214360	0	9.51632	Inf	Inf	0.0257159	0.0445675
ENSG00000113946	0	9.51393	Inf	Inf	0.0257382	0.0446011
ENSG00000261832	0	17.978	Inf	Inf	0.0273296	0.0471246
ENSG00000004948	0	11.1967	Inf	Inf	0.0281118	0.048367
