# Supplementary material for: The RNA-binding profile of Acinus, a peripheral component of the exon junction complex, reveals its role in splicing regulation
Source: RNA. 2016 Sep;22(9):1411–26. doi: 10.1261/rna.057158.116 (PMC4986896; doi:10.1261/rna.057158.116)
Supplement: Supplemental Material [file supp_057158.116_Supp_Table_S3.xlsx]

## Sheet: Sheet1
GENE	ENSEMBL	EVENT	Full Coordinates	siAcinus_1	siAcinus_2	siAcinus_3	sicontrol_1	sicontrol_2	sicontrol_3	delta_psi	co-regulation_eIF4A3
ACAD11	ENSG00000240303	HsaALTA0000136-1/2	chr3:132298336,132297677-132297900+132297725	50	50	60	100	96.3	97.3	-44.5333	opp
ACAD11	ENSG00000240303	HsaALTA0000136-2/2	chr3:132298336,132297677-132297900+132297725	50	50	40	0	3.7	2.7	44.5333	opp
APH1A	ENSG00000117362	HsaALTA0000551-1/2	chr1:150241098,150240357-150240527+150240391	31.34	33.33	30.25	8.35	8.93	10.95	22.23	co-reg
APOO	ENSG00000184831	HsaALTA0000570-1/2	chrX:23858430,-23851729+23851627	47.35	46.16	50.46	28.06	28.11	30.88	18.9733	co-reg
APOO	ENSG00000184831	HsaALTA0000570-2/2	chrX:23858430,-23851729+23851627	52.65	53.84	49.54	71.94	71.89	69.12	-18.9733	co-reg
ARMCX3	ENSG00000102401	HsaALTA0000657-1/2	chrX:100878266,100878804+100878776-100878883	96.38	94.7	93.06	58.33	59.26	61.54	35.0033	no
ARMCX3	ENSG00000102401	HsaALTA0000657-2/2	chrX:100878266,100878804+100878776-100878883	3.62	5.3	6.94	41.67	40.74	38.46	-35.0033	no
C17orf68	ENSG00000178971	HsaALTA0001111-1/2	chr17:8141349,8140693-8140837+8140732	48.06	37.37	33.21	0	4.36	0	38.0933	co-reg
C17orf68	ENSG00000178971	HsaALTA0001111-2/2	chr17:8141349,8140693-8140837+8140732	51.94	62.63	66.79	100	95.64	100	-38.0933	co-reg
C3orf63	ENSG00000163946	HsaALTA0001278-2/2	chr3:56672734,56667072-56667994+56667871	88.3	90.29	92.36	72.77	71.27	72.95	17.9867	no
C9orf100	ENSG00000137135	HsaALTA0001377-1/2	chr9:35662509,35662176-35662264+35662224	33.53	35.63	46.1	3.22	0	3.29	36.25	no
C9orf100	ENSG00000137135	HsaALTA0001377-2/2	chr9:35662509,35662176-35662264+35662224	66.47	64.37	53.9	96.78	100	96.71	-36.25	no
ENTPD6	ENSG00000197586	HsaALTA0002923-2/2	chr20:25204793,25205841+25205798-25205953	22.03	18.23	26.77	47.37	44.44	46.43	-23.7367	no
MRPS22	ENSG00000175110	HsaALTA0005355-1/2	chr3:139069164,139069873+139069819-139069902	45.91	51.79	54.48	6.4	6.76	5.74	44.4267	co-reg
MRPS22	ENSG00000175110	HsaALTA0005355-2/2	chr3:139069164,139069873+139069819-139069902	54.09	48.21	45.52	93.6	93.24	94.26	-44.4267	co-reg
PDCD10	ENSG00000114209	HsaALTA0006139-1/3	chr3:167452594,167452002-167452138+167452133+167452034	72.72	63.88	83.95	16.9	21.11	10.02	57.5067	no
PSPH	ENSG00000146733	HsaALTA0006789-1/2	chr7:56101654,56099622-56099747+56099670	24.98	28.75	29.59	6.71	4.73	7.94	21.3133	co-reg
PSPH	ENSG00000146733	HsaALTA0006789-2/2	chr7:56101654,56099622-56099747+56099670	75.02	71.25	70.41	93.29	95.27	92.06	-21.3133	co-reg
RAB2B	ENSG00000129472	HsaALTA0006914-1/2	chr14:21943026,21936829-21936911+21936867	85.37	86.78	68.63	20.15	8.35	18.72	64.52	co-reg
38596	NA	HsaALTA0007624-1/2	chr22:19707977,19708165+19708072-19708189	26.72	31.71	28.93	1.59	4.56	0	27.07	no
38596	NA	HsaALTA0007624-2/2	chr22:19707977,19708165+19708072-19708189	73.28	68.29	71.07	98.41	95.44	100	-27.07	no
SGSM3	ENSG00000100359	HsaALTA0007748-2/2	chr22:40805022,40805344+40805254-40805376	48.66	42.62	46.87	88.14	83.87	69.03	-34.2967	co-reg
SLC25A36	ENSG00000114120	HsaALTA0007885-1/2	chr3:140682069,140685842+140685776-140685847	62.03	76.24	70	13.73	28	17.5	49.68	no
SLC25A36	ENSG00000114120	HsaALTA0007885-2/2	chr3:140682069,140685842+140685776-140685847	37.97	23.76	30	86.27	72	82.5	-49.68	no
SLC25A43	ENSG00000077713	HsaALTA0007892-1/2	chrX:118544325,118585972+118585813-118586106	30	28	28.57	80.6	84.06	78.87	-52.32	co-reg
SLC25A43	ENSG00000077713	HsaALTA0007892-2/2	chrX:118544325,118585972+118585813-118586106	70	72	71.43	19.4	15.94	21.13	52.32	co-reg
SRSF2	ENSG00000161547	HsaALTA0008227-1/3	chr17:74732236,74731854-74731957+74731921+74731885	52.28	58.33	63.9	6.44	16.34	18.22	44.5033	co-reg
SUPT7L	ENSG00000119760	HsaALTA0008372-1/2	chr2:27885046,27883851-27884468+27884255	48.76	56.49	54.23	82.68	87.69	82.71	-31.2	no
SUPT7L	ENSG00000119760	HsaALTA0008372-2/2	chr2:27885046,27883851-27884468+27884255	51.24	43.51	45.77	17.32	12.31	17.29	31.2	no
TMUB2	ENSG00000168591	HsaALTA0008833-1/2	chr17:42265377,42266390+42266303-42266667	59.91	70.74	58.73	30.28	43.02	24.38	30.5667	opp
UBR5	ENSG00000104517	HsaALTA0009253-1/2	chr8:103312228,103311680-103311775+103311724	28.99	39.79	31.75	4.9	1.23	2.82	30.5267	no
UBR5	ENSG00000104517	HsaALTA0009253-2/2	chr8:103312228,103311680-103311775+103311724	71.01	60.21	68.25	95.1	98.77	97.18	-30.5267	no
AGAP6	ENSG00000204149	HsaALTD0000193-2/2	chr10:51761201-51761456+51761506,51761756	84.21	75	93.75	40	57.14	85.71	23.37	opp
ATXN2L	ENSG00000168488	HsaALTD0000616-1/2	chr16:28847254-28847443+28847497,28848049	45.5	10	23.83	74.79	82.23	74.34	-50.6767	co-reg
ATXN2L	ENSG00000168488	HsaALTD0000616-2/2	chr16:28847254-28847443+28847497,28848049	54.5	90	76.17	25.21	17.77	25.66	50.6767	co-reg
C14orf153	ENSG00000126214	HsaALTD0000824-2/3	chr14:104145745-104145824+104145855+104145882,104153418	74.13	79.71	71.77	30.49	41.22	39.22	38.2267	no
C14orf153	ENSG00000126214	HsaALTD0000824-3/3	chr14:104145745-104145824+104145855+104145882,104153418	25.42	20.29	28.23	69.51	58.78	60.78	-38.3767	no
PVR	ENSG00000073008	HsaALTD0005188-1/2	chr19:45162010-45162033+45162168,45164559	68.4	52.88	57.25	24.94	20.8	24.04	36.25	co-reg
SNHG12	ENSG00000197989	HsaALTD0006103-1/2	chr1:28906454+28906424-28906493,28906099	57.14	36.36	43.42	14.49	15.09	16.44	30.3	co-reg
AARSD1	ENSG00000108825	HsaEX0000169	chr17:41108421,41108221-41108337,41107989	67.07	67.02	61.05	94.38	94.3	93.34	-28.96	co-reg
AC073995.2	ENSG00000174501	HsaEX0001319	chr2:96519457,96517874-96517944,96517535	100	100	100	62.85	65.11	72.33	33.2367	co-reg
AC092296.1	NA	HsaEX0001398	chr19:36821155,36813032-36813127+36813286,36812932	26.87	19.59	29.19	51.69	48.07	56.72	-26.9433	no
ADARB1	ENSG00000197381	HsaEX0002626	chr21:46494708,46540709-46540874,46548317	14.83	21.58	16.61	44.1	43.5	41.55	-25.3767	co-reg
ADARB1	ENSG00000197381	HsaEX0002629	chr21:46494708,46538479-46538534,46540709	13.04	12.47	11.83	31.93	34.05	28.43	-19.0233	co-reg
AHSA2	ENSG00000173209	HsaEX0003277	chr2:61408540,61410682-61410797+61411157,61411847	10.53	14.29	17.74	54.19	45.58	46.27	-34.4933	no
ANKRD10	ENSG00000088448	HsaEX0004267	chr13:111558380,111552877-111553008+111553041+111553424,111545610	62.64	39.47	43.6	12.67	6.65	8.67	39.24	no
AP2M1	ENSG00000161203	HsaEX0004932	chr3:183898039,183898433-183898438,183898637	66.72	70.13	69.67	52.07	56.27	52.14	15.3467	opp
APLP2	ENSG00000084234	HsaEX0005149	chr11:129992408,129993507-129993674,129996595	13.94	13.83	13.05	27.05	25.63	25.08	-12.3133	no
ARSA	ENSG00000100299	HsaEX0006060	chr22:51066326+51066374+51066419,51065984-51066220,51065834	58.06	47.37	54.17	80.49	86.96	88.89	-32.2467	no
ATRX	ENSG00000085224	HsaEX0007239	chrX:76952065,76949313-76949426,76944417+76944420	84.69	85.8	84.28	67.92	65.12	62.23	19.8333	co-reg
ATXN2L	ENSG00000168488	HsaEX0007272	chr16:28847443+28847497,28847647+28847770-28847806+28847811,28847919+28848049+28848069+28848072	57.56	50	52.61	29.23	25.3	28.01	25.8767	co-reg
C12orf10	ENSG00000139637	HsaEX0009115	chr12:53694046,53699982+53699986-53700104,53700444+53700464	87.05	87.9	86.17	96.75	97.17	98.64	-10.48	no
C16orf13	ENSG00000249124	HsaEX0009599	chr16:686094,685612-685774,685340	45.55	44.13	38.24	22.53	23.68	22.69	19.6733	no
C16orf93	ENSG00000196118	HsaEX0009730	chr16:30771605,30770499-30770568,30768975	34.26	37.37	42.37	70.35	70.04	65.63	-30.6733	no
C17orf57	ENSG00000178852	HsaEX0009786	chr17:45455269,45456548-45456619,45468803	100	85.71	83.84	33.33	100	100	12.0733	co-reg
C19orf25	ENSG00000119559	HsaEX0009939	chr19:1478653+1478773+1478881,1475137-1475238+1475257+1475513,1461823	62.5	60.36	65.91	91.78	89.33	83.56	-25.3	opp
C1orf77	ENSG00000160679	HsaEX0010327	chr1:153614905,153615703-153615840,153617540	78.18	80.05	75.62	93.7	95.58	94.34	-16.59	no
C3orf18	ENSG00000088543	HsaEX0010854	chr3:50604894,50603437-50603525,50603292	20.75	24.05	16.58	59.37	53.97	49.95	-33.97	no
C4orf43	ENSG00000198498	HsaEX0011055	chr4:164435310,164436465-164436613,164438586	59.03	55.09	56.96	81.76	83.93	79.98	-24.8633	co-reg
CAPN10	ENSG00000142330	HsaEX0012338	chr2:241534721,241535736-241535938,241536098	53.64	66.06	67.36	90.92	95.13	90.84	-29.9433	co-reg
CAPN10	ENSG00000142330	HsaEX0012339	chr2:241535938,241536098-241536359,241537305	44.81	52.72	37.88	87.26	84.4	85.81	-40.6867	co-reg
CASK	ENSG00000147044	HsaEX0012546	chrX:41419032,41416285-41416353,41414888	30.99	29.88	25.22	53.12	53.99	50.21	-23.7433	no
CBS	ENSG00000160200	HsaEX0012765	chr21:44480551,44479336-44479413,44478363	75.49	76.27	73.61	91.84	94.34	93.28	-18.03	co-reg
CBS	ENSG00000160200	HsaEX0012766	chr21:44480551,44478944-44479078,44478363	73.49	75.51	73.49	92.12	94.09	94.09	-19.27	co-reg
CD46	ENSG00000117335	HsaEX0013872	chr1:207940540,207941124-207941168,207943666	30.51	30.89	34.03	23.42	21.04	21.73	9.74667	no
CENPO	ENSG00000138092	HsaEX0014634	chr2:25016370+25016389,25016721-25016834,25022544	28.67	20.28	29.71	47.27	49.05	49.83	-22.4967	opp
CREM	ENSG00000095794	HsaEX0017225	chr10:35437419,35467800+35467817-35467914,35495823	63.07	59.96	63.06	82.04	82.55	80.66	-19.72	co-reg
CREM	ENSG00000095794	HsaEX0017226	chr10:35467914,35468062-35468204,35495823	65.03	64.84	67.96	88.53	86.52	85.65	-20.9567	co-reg
CYTSA	ENSG00000100014	HsaEX0018371	chr22:24717291,24717373-24718886,24720188	54.96	52.39	53	74.59	81.29	81.38	-25.6367	no
DCAF6	ENSG00000143164	HsaEX0018644	chr1:167974031,167992226-167992285,168007609	43.03	43.22	39.77	21.21	22.12	19.6	21.03	no
DCLRE1B	ENSG00000118655	HsaEX0018701	chr1:114448391+114448397,114449607+114449618-114449783,114450619+114450631	29.1	31.42	32.37	56.87	66.66	58.06	-29.5667	co-reg
DNAH14	ENSG00000185842	HsaEX0020149	chr1:225226525,225230537-225230816,225266909	40.57	34.46	100	68.01	49.21	83.85	-8.68	co-reg
DNM1L	ENSG00000087470	HsaEX0020452	chr12:32890095,32891198-32891230,32892998	75.56	78.23	80.12	61.76	60.66	63.19	16.1	opp
DPP7	ENSG00000176978	HsaEX0020853	chr9:140008317,140007809+140007813-140007930+140007948+140008167,140007739	91.29	89.38	91.85	55.08	63.01	57.84	32.1967	opp
ECHDC1	ENSG00000093144	HsaEX0021497	chr6:127648147,127637595-127637647,127636041	66.22	65.48	64.74	50.51	48.43	51.34	15.3867	co-reg
ECT2	ENSG00000114346	HsaEX0021536	chr3:172473164,172473273-172473365,172474773	66.07	65.4	65.74	44.69	43.81	42.11	22.2	opp
EIF4G2	ENSG00000110321	HsaEX0022051	chr11:10823596,10823208-10823321,10822634	67.73	68.4	68.59	84.7	84.67	84.31	-16.32	no
EVC	ENSG00000072840	HsaEX0023330	chr4:5815889,5819938-5819981,5825344	81.82	78.95	100	33.67	22.22	33.33	57.1833	co-reg
EXD3	ENSG00000187609	HsaEX0023408	chr9:140289755,140277765-140277829,140262441	93.85	100	97.14	66.67	55.56	52.94	38.6067	no
EXO1	ENSG00000174371	HsaEX0023418	chr1:242012329,242012411+242012414-242012518,242013711	56.82	50.91	59.32	24.03	28.57	23.6	30.2833	co-reg
EXOC7	ENSG00000182473	HsaEX0023505	chr17:74090495,74087224-74087316+74087353,74085401	20.21	17.13	24.86	56.8	50.47	65.6	-36.89	no
F3	ENSG00000117525	HsaEX0023640	chr1:94998646,94997877-94998036,94996152	73.48	72.66	74.14	89.97	92.67	91.91	-18.09	no
FAM173B	ENSG00000150756	HsaEX0024179	chr5:10236590+10236634,10235323-10235373,10227759+10227775	53.88	59.64	58.74	77.71	79.01	74.5	-19.6533	no
FAM189B	ENSG00000160767	HsaEX0024287	chr1:155224444,155224191-155224247,155223985	45.61	46.72	47.94	64.45	64.04	64.16	-17.46	co-reg
FAM189B	ENSG00000160767	HsaEX0024289	chr1:155223875,155223650-155223769,155223523	51.04	54.28	52.68	67.61	69.08	71.66	-16.7833	no
FAM193B	ENSG00000146067	HsaEX0024337	chr5:176981250,176980169-176980351,176966148	35.9	39.39	50.82	89.49	75.07	68.93	-35.7933	no
FAM48A	ENSG00000102710	HsaEX0024471	chr13:37625625,37622701-37622736,37622073	86.23	82.34	90.82	58.06	56.26	64.92	26.7167	opp
FASTK	ENSG00000164896	HsaEX0024941	chr7:150774397,150774188-150774301+150774323,150773919	86.62	87.94	84.51	69.86	66.81	64.09	19.4367	no
FLNB	ENSG00000136068	HsaEX0025938	chr3:58116635,58117654-58117716+58117746,58118535	42.96	45.45	43.88	64.52	69.19	59.62	-20.3467	no
GATS	ENSG00000160844	HsaEX0027122	chr7:99810670,99809017-99809617,99800226	36.36	20	50	55.56	71.43	83.33	-34.6533	NA
GINS3	ENSG00000181938	HsaEX0027486	chr16:58426691+58426697,58437002-58437235+58437239,58438403	56.1	66.46	68.55	83.52	88.14	93.01	-24.52	no
GLYCTK	ENSG00000168237	HsaEX0027751	chr3:52325127,52325763+52325844-52325938,52326276	47.42	65.59	58.4	86.57	91.52	87.59	-31.4233	no
GLYCTK	ENSG00000168237	HsaEX0027752	chr3:52325127,52326276-52326585,52327062+52327087	40.9	73.47	52.46	100	95.37	94.78	-41.1067	no
GOLIM4	ENSG00000173905	HsaEX0028003	chr3:167759180,167758574-167758657,167754782	80.78	80.84	82.6	65.65	68.12	62.56	15.9633	no
GPR137	ENSG00000173264	HsaEX0028305	chr11:64055418,64055467+64055537-64055686,64055812	87.86	91.56	85.8	59.74	66.16	67.31	24.0033	no
GPR180	ENSG00000152749	HsaEX0028391	chr13:95271771,95273332-95273489,95275363	85.12	80.42	77.63	100	100	100	-18.9433	no
H2AFY	ENSG00000113648	HsaEX0029173	chr5:134696187,134686513+134686517-134686603,134681747	16.25	13.95	15.58	4.23	5.69	5.28	10.1933	no
HCFC1R1	ENSG00000103145	HsaEX0029335	chr16:3073848,3073475-3073531,3073362	81.08	78.19	78.98	61.15	59.52	60.41	19.0567	co-reg
HNRNPH1	ENSG00000169045	HsaEX0030293	chr5:179047893,179045146-179045324,179044912+179044933	81.13	82.74	81.98	94.74	95.36	96.01	-13.42	co-reg
HNRNPH1	ENSG00000169045	HsaEX0030294	chr5:179047893,179044990-179045061,179044912+179044933	78.42	81.12	78.93	93.73	94.04	95.07	-14.79	co-reg
IQCE	ENSG00000106012	HsaEX0032098	chr7:2598851,2606750-2606797,2611160	43.97	44.12	43.9	75.72	77.82	81.48	-34.3433	co-reg
IQSEC1	ENSG00000144711	HsaEX0032160	chr3:12949849,12944273-12944322,12943022	23.93	27.34	17	57.56	56.33	54.09	-33.2367	opp
ISOC2	ENSG00000063241	HsaEX0032264	chr19:55967716,55967003-55967212,55966697+55966745	83.73	80.97	77.78	50.17	58.37	53.67	26.7567	opp
ISYNA1	ENSG00000105655	HsaEX0032278	chr19:18548409,18547494-18547915,18547289	88.68	94.32	93.6	72.59	75.07	72.67	18.7567	no
ISYNA1	ENSG00000105655	HsaEX0032280	chr19:18548670,18548409-18548570,18547289	89.2	86.49	92.47	65.98	70.48	69.29	20.8033	co-reg
KCNQ4	ENSG00000117013	HsaEX0033106	chr1:41288074,41289769-41289930,41296756	100	67.3	100	38.32	50	59.95	39.6767	opp
KIAA0141	ENSG00000081791	HsaEX0033456	chr5:141318325,141318417+141318421-141318469,141319071+141319075+141319119	52.31	55.46	52.55	9.59	20.91	16.11	37.9033	opp
KIAA1467	ENSG00000084444	HsaEX0034112	chr12:13232943,13233559-13233819+13233848,13235937	29.41	46.67	50	75	85.71	100	-44.8767	co-reg
KITLG	ENSG00000049130	HsaEX0034675	chr12:88910111,88909311-88909394,88900914	82.34	82.29	81.4	62.55	65.71	63.71	18.02	no
L1CAM	ENSG00000198910	HsaEX0035105	chrX:153129777,153129338-153129472,153129004	75.92	73.62	74.06	61.11	60.84	59.27	14.1267	no
LMO7	ENSG00000136153	HsaEX0036081	chr13:76378677,76383290-76383319,76391297	44.23	40.26	45.25	75.32	76.49	76.68	-32.9167	no
MAP3K7	ENSG00000135341	HsaEX0037601	chr6:91228977,91228166-91228281,91226400	96.49	97.38	98.77	80.05	82.55	79.06	16.9933	co-reg
MAPT	ENSG00000186868	HsaEX0037850	chr17:44064461,44067244-44067441,44068826	0.63	3.05	0	32.67	30.13	29.15	-29.4233	co-reg
37316	NA	HsaEX0037867	chr19:8478304+8478678,8483421-8483691,8486673	38.71	43.24	52.94	88.57	72.88	87.88	-38.1467	opp
MDM2	ENSG00000135679	HsaEX0038399	chr12:69202260+69202271,69202796-69202866,69202988	31.91	31.27	30.39	6.79	5.58	12.44	22.92	no
METTL4	ENSG00000101574	HsaEX0038921	chr18:2567511,2566820-2567152,2563858	100	100	83.33	60.71	37.14	63.08	40.8	no
MGA	ENSG00000174197	HsaEX0039070	chr15:42028566+42028896,42032104+42032251+42032255-42032401,42046635	73.03	73.91	77.78	94.64	97.92	98.02	-21.9533	co-reg
MON2	ENSG00000061987	HsaEX0039780	chr12:62959160,62959794-62959811,62960102	94.5	92.95	88.13	49.86	47.3	48.53	43.2967	opp
MST1R	ENSG00000164078	HsaEX0040367	chr3:49933628,49933148-49933313,49932806+49932829	48.89	46.81	51.11	87.83	82.96	91.45	-38.4767	opp
MST1R	ENSG00000164078	HsaEX0040368	chr3:49933628,49932880-49932981,49932806+49932829	45.88	43.18	46.99	84.69	79.9	90.15	-39.5633	opp
MUM1	ENSG00000160953	HsaEX0040787	chr19:1358463,1358587-1358692+1358699,1360135	38.58	27.52	28.67	71.07	65.29	56.94	-32.8433	no
MYCBP2	ENSG00000005810	HsaEX0040930	chr13:77817194,77807291-77807398,77799689	61.04	58.08	50.54	83.05	80.56	81.18	-25.0433	opp
MYH10	ENSG00000133026	HsaEX0040951	chr17:8480554,8479961-8479990,8473130	51.5	45.08	45.36	17.14	16.35	18.08	30.1233	opp
NDUFV3	ENSG00000160194	HsaEX0042343	chr21:44317157,44323292-44324386,44328974	19.66	17.48	18.45	34.62	32.2	32.29	-14.5067	no
NID2	ENSG00000087303	HsaEX0042906	chr14:52495440,52493919-52494062,52486896	81.11	86.44	88.85	63.11	66.73	68.98	19.1933	no
NSUN5P1	ENSG00000223705	HsaEX0043968	chr7:75041042,75042067-75042210,75044163	37.68	41.48	39.15	24.1	19.49	22.49	17.41	opp
NT5DC2	ENSG00000168268	HsaEX0044016	chr3:52558833,52558629-52558747,52558627	60.53	62.64	65.58	78.91	80.12	82.35	-17.5433	co-reg
OSGEPL1	ENSG00000128694	HsaEX0044977	chr2:190626146,190619899-190620281+190620286,190618790	50.7	65.12	71.7	100	100	100	-37.4933	opp
OSGEPL1	ENSG00000128694	HsaEX0044978	chr2:190619899,190618867-190619071,190618790	47.15	67.38	70.31	100	100	100	-38.3867	opp
PAQR3	ENSG00000163291	HsaEX0045473	chr4:79860194,79856275-79856437,79851479	83.72	80.25	78.09	96.69	98.58	100	-17.7367	co-reg
PHF15	ENSG00000043143	HsaEX0046971	chr5:133909452,133912458-133912586,133914184+133914187	56.02	54.49	50.68	78.24	72.28	69.51	-19.6133	opp
PHTF1	ENSG00000116793	HsaEX0047235	chr1:114243416,114242815-114242865,114242421	21.65	19.32	18.87	57.01	47.45	52.31	-32.31	opp
PIAS2	ENSG00000078043	HsaEX0047318	chr18:44400896,44398241-44398410,44395312	34.33	40.31	41.73	8.96	13.14	12.71	27.1867	co-reg
PPHLN1	ENSG00000134283	HsaEX0049396	chr12:42729776,42745687-42745851,42748963	43.81	41.33	43.81	59.65	58.71	60.89	-16.7667	no
PPHLN1	ENSG00000134283	HsaEX0049400	chr12:42768876,42778742-42778798,42781258	54.18	54.21	48.02	77.51	74.44	77.87	-24.47	co-reg
PPIL5	ENSG00000165501	HsaEX0049450	chr14:50069181+50069186,50074118-50074839,50080974	68.09	60.13	67.25	41.52	47.68	47.79	19.4933	no
PPOX	ENSG00000143224	HsaEX0049526	chr1:161137917,161138203+161138222+161138235-161138366,161140410+161140470	62.87	66.12	64.29	86.59	91.05	82.16	-22.1733	co-reg
PPOX	ENSG00000143224	HsaEX0049527	chr1:161138366,161138783-161138973,161140410+161140470	68.15	73.02	77.04	94.94	98.27	90.4	-21.8	co-reg
PPP3CB	ENSG00000107758	HsaEX0049746	chr10:75204483,75199630-75199659,75198178	86.51	86.14	76.94	57.2	61.86	48.19	27.4467	opp
PSPH	ENSG00000146733	HsaEX0050684	chr7:56118831+56119007,56101654-56101796+56101799+56101847,56099670+56099747	72.13	69.16	71.66	90.67	96.78	90.95	-21.8167	co-reg
PTPRS	ENSG00000105426	HsaEX0051217	chr19:5219321,5218798-5218809,5218543	72.85	81.65	77.08	19.69	26.48	22.72	54.23	no
PUS1	ENSG00000177192	HsaEX0051298	chr12:132417378,132419189-132419300+132420740,132423718	24.13	27.85	28.28	9.42	5.5	8.21	19.0433	no
PXN	ENSG00000089159	HsaEX0051413	chr12:120703420,120664156+120664165+120664642-120664920,120662180	13.69	14.43	12.71	35.17	29.57	30.9	-18.27	opp
PYCR1	ENSG00000183010	HsaEX0051418	chr17:79892529,79892202-79892365,79891252	90.73	90.23	90.45	70.49	71.61	71.71	19.2	opp
RAG1AP1	ENSG00000169241	HsaEX0051988	chr1:155108852+155108872,155109304-155109427,155110037+155110055	80.68	75.36	70.02	56.58	57.87	54.77	18.9467	co-reg
RASA4B	ENSG00000170667	HsaEX0052378	chr7:102133563,102131433-102131570,102129045	75.34	80	79.59	48.28	56.92	48.48	27.0833	opp
RFFL	ENSG00000092871	HsaEX0053189	chr17:33353393,33348390-33348800,33344625	45.01	44.2	49.56	78.11	69.8	82.32	-30.4867	no
RFXANK	ENSG00000064490	HsaEX0053288	chr19:19307855,19307995-19308060,19308330	57.75	58.7	56.85	38.01	40.22	41.05	18.0067	no
RNF4	ENSG00000063978	HsaEX0054133	chr4:2498848+2502465,2513683-2513692,2514165+2514810+2502386	91.76	90.46	79.4	0	40.11	73.11	49.4667	no
RP11-27I1.2	NA	HsaEX0054579	chr9:123605717+123605807,123606101-123607177,123607271	11.11	16.67	11.11	27.27	62.5	100	-50.2933	opp
RSAD1	ENSG00000136444	HsaEX0055782	chr17:48556380,48556990-48557123,48557241	74.55	79.6	67.5	98.16	100	100	-25.5033	no
RSAD1	ENSG00000136444	HsaEX0055784	chr17:48557123,48557241-48557445,48559452	71.7	80.19	70.26	98.73	94.12	94.63	-21.7767	no
SEC31A	ENSG00000138674	HsaEX0056948	chr4:83784471,83783687-83783725,83778917	51.71	50.88	52.34	37.84	33.29	34.92	16.2933	no
SLC25A44	ENSG00000160785	HsaEX0059141	chr1:156165964,156168784-156169512,156169626	21.74	28	17.07	64.91	51.43	60	-36.51	opp
SLMAP	ENSG00000163681	HsaEX0060187	chr3:57908750,57911572-57911661,57913023	33.35	24.37	28.8	65.19	65.68	66.8	-37.05	no
SMPD4	ENSG00000136699	HsaEX0060509	chr2:130921947,130918759-130918845,130914969	14.4	17.14	13.78	32.76	33.97	33.33	-18.2467	no
SNX19	ENSG00000120451	HsaEX0060829	chr11:130786175,130784161+130784589-130784644,130781666	68	69.23	65.43	94.03	94.12	92.59	-26.0267	no
SPTAN1	ENSG00000197694	HsaEX0061552	chr9:131353904,131355262-131355321,131356454	63.58	60.84	62.25	77.04	77.87	77.53	-15.2567	no
STRA13	ENSG00000169689	HsaEX0062599	chr17:79977734,79977386+79977517-79977570,79977257	61.9	58.98	66.08	38.82	40.07	38.68	23.13	no
TAF1	ENSG00000147133	HsaEX0063414	chrX:70678207+70678216,70679000-70679101,70679402	14.22	17.01	15.48	38.28	40.31	32.13	-21.3367	no
TBC1D23	ENSG00000036054	HsaEX0063853	chr3:100029386,100030677-100030721,100034943	25.4	37.86	38.8	70.26	67.29	64.71	-33.4	co-reg
TEX15	ENSG00000133863	HsaEX0064558	chr8:30744683,30732453-30732618,30725018	32	61.29	36	83.33	96.15	80.77	-43.6533	NA
THOC2	ENSG00000125676	HsaEX0064853	chrX:122757638,122757495-122757560,122757134	39.78	40.6	41.18	12.21	12.5	13.66	27.73	no
TP53I3	ENSG00000115129	HsaEX0066605	chr2:24303689,24302314-24302510,24300631	72.92	74.39	74.92	90.76	94.02	93.02	-18.5233	no
TRIM65	ENSG00000141569	HsaEX0067175	chr17:73888092+73888096,73887894-73887959,73887428	71.25	61.62	69.18	89.07	93.48	92.95	-24.4833	no
TRMT1	ENSG00000104907	HsaEX0067284	chr19:13220972,13220729-13220815,13220652	90.65	88.86	89.75	56.85	55.65	58.13	32.8767	opp
TSNARE1	ENSG00000171045	HsaEX0067593	chr8:143365774,143361221-143361685,143356220+143356224	71.55	50.19	100	25.42	23.08	33.55	46.5633	opp
TTF2	ENSG00000116830	HsaEX0068042	chr1:117638921,117639973-117640055,117641455	66.85	63.7	54.2	87.9	91.16	92.68	-28.9967	co-reg
TTF2	ENSG00000116830	HsaEX0068043	chr1:117640055,117640828-117640860,117641455	35.54	27.45	33.7	6.22	7.29	5.77	25.8033	co-reg
UGGT2	ENSG00000102595	HsaEX0069175	chr13:96638587,96637493-96637591,96636118	46.43	46.03	42.22	13.64	15.29	17.36	29.4633	no
UNK	ENSG00000132478	HsaEX0069419	chr17:73781065,73787841-73788100,73805841	38.88	36.02	36.7	64.43	62.28	67.36	-27.49	no
UNK	ENSG00000132478	HsaEX0069420	chr17:73781065,73788394-73788559,73805841	44.11	32.49	40.44	73.21	64.99	74.65	-31.9367	co-reg
UNK	ENSG00000132478	HsaEX0069421	chr17:73781065,73789524-73789612+73789617,73805841	35.69	20.81	27.92	64.18	52.2	66.36	-32.7733	co-reg
URB2	ENSG00000135763	HsaEX0069509	chr1:229763506,229768016-229768192,229779280	46.94	51.84	52.11	94.06	93.23	94.81	-43.7367	co-reg
URB2	ENSG00000135763	HsaEX0069510	chr1:229763506,229770664-229772163,229779280	32.48	34	39.34	89.6	88.55	89.33	-53.8867	co-reg
URB2	ENSG00000135763	HsaEX0069512	chr1:229763506,229773929-229773994,229779280	32.71	39.87	39.51	96	95.32	88.65	-55.96	co-reg
USP36	ENSG00000055483	HsaEX0069827	chr17:76794482,76792399-76793961+76793984,76783740	63.38	58.27	60.76	88.16	85.4	82.78	-24.6433	no
WDR90	ENSG00000161996	HsaEX0071418	chr16:716792,716905-716989,717432+717514	63.18	69.54	63.97	92.28	86.45	91.06	-24.3667	no
ZDHHC8	ENSG00000099904	HsaEX0072552	chr22:20127338+20127415+20127530,20127638-20127740,20128140	100	93.47	96.72	71.72	76.24	71.12	23.7033	no
ZMIZ2	ENSG00000122515	HsaEX0072863	chr7:44799059+44799345,44799750-44799827,44800024	90	82.61	85.05	52.45	48.84	38.19	39.3933	opp
ZMIZ2	ENSG00000122515	HsaEX0072864	chr7:44805178,44805566-44805655,44805763+44805821	38.82	29.58	33.33	9.62	11.24	5.26	25.2033	co-reg
ZNF772	ENSG00000197128	HsaEX0074328	chr19:57988002,57987028-57987154,57985789	24.39	40.3	11.11	85.34	100	64.5	-58.0133	NA
ZZZ3	ENSG00000036549	HsaEX0074700	chr1:78107069,78105134-78105287,78050340	74.38	79.91	74.71	93.23	93.78	95.86	-17.9567	co-reg
ZZZ3	ENSG00000036549	HsaEX0074701	chr1:78105134,78098800-78099090,78050340	64.29	66.67	62.42	87.11	85.53	84.62	-21.2933	co-reg
ANKRD10	ENSG00000088448	HsaINT0008386	chr13:111558380-111558471=111545375-111545610:-	91.49	72.97	69.77	48.2	45.04	34.64	35.45	no		41
APH1A	ENSG00000117362	HsaINT0010455	chr1:150238933-150239056=150237799-150238594:-	45.99	45.94	45.07	60.19	61.85	57.01	-14.0167	no
ATP5D	ENSG00000099624	HsaINT0014977	chr19:1244314-1244439=1244736-1244824:+	44.76	44.48	40.97	61.98	65.42	61.65	-19.6133	no
BRIP1	ENSG00000136492	HsaINT0018637	chr17:59940645-59940920=59938808-59938930:-	65	45.45	56.86	2.04	3.23	3.45	52.8633	no
C14orf79	ENSG00000140104	HsaINT0020823	chr14:105455280-105455425=105457828-105457957:+	70.37	76	80	32.14	38.03	23.29	44.3033	co-reg
C16orf93	ENSG00000196118	HsaINT0021236	chr16:30770975-30771045=30770663-30770779:-	31.58	38.89	4.76	80	71.43	82.61	-52.9367	opp
C21orf2	ENSG00000160226	HsaINT0023068	chr21:45750706-45750802=45748827-45750209:-	18.75	25.45	24.44	57.65	45.95	53.62	-29.5267	opp
C21orf58	ENSG00000160298	HsaINT0023122	chr21:47722399-47722490=47721047-47722068:-	30.77	16.67	9.52	63.16	71.43	51.72	-43.1167	no
C2orf60	ENSG00000162971	HsaINT0023509	chr2:200803656-200803793=200801128-200801215:-	49.43	43.34	53.06	18.89	14.4	9.38	34.3867	no
C6orf170	ENSG00000146350	HsaINT0024667	chr6:121433651-121433805=121427169-121427309:-	75	100	73.98	14.29	11.11	16.67	68.97	NA
C8orf40	ENSG00000176209	HsaINT0025154	chr8:42396298-42396342=42401612-42401749:+	100	55.56	100	55.56	36.36	66.67	32.3233	opp
C9orf100	ENSG00000137135	HsaINT0025275	chr9:35663319-35663389=35662943-35663071:-	52.63	56.76	42.57	25.79	25.71	23.88	25.5267	no
C9orf100	ENSG00000137135	HsaINT0025277	chr9:35662509-35662738=35662176-35662264:-	44	43.59	42.22	15.11	7.59	8.7	32.8033	co-reg
C9orf142	ENSG00000148362	HsaINT0025360	chr9:139887092-139887152=139887377-139887426:+	32.13	33.72	35.14	60.36	58.37	56.88	-24.8733	co-reg
C9orf86	ENSG00000196642	HsaINT0025590	chr9:139732314-139732467=139733361-139733573:+	50.29	48.17	45.19	70.48	72.38	63.27	-20.8267	no
C9orf86	ENSG00000196642	HsaINT0025592	chr9:139733674-139733938=139734146-139734317:+	25.71	30	26.58	57.69	52.52	56.01	-27.9767	no
C9orf86	ENSG00000196642	HsaINT0025596	chr9:139730194-139730297=139731798-139732114:+	60.13	65.05	57.47	79.35	77.82	78.56	-17.6933	opp
CCDC121	ENSG00000176714	HsaINT0028875	chr2:27851263-27851745=27848506-27850784:-	100	0	NA	NA	68.63	NA	-18.63	NA
CCDC142	ENSG00000135637	HsaINT0029076	chr2:74708944-74710357=74708579-74708665:-	83.33	73.33	91.67	53.49	53.12	52.78	29.6467	opp
CD46	ENSG00000117335	HsaINT0031166	chr1:207940358-207940540=207956637-207956675:+	81.89	84.99	89.69	50.07	50.14	43.94	37.4733	opp
CDC16	ENSG00000130177	HsaINT0031484	chr13:115037659-115037956=115038039-115038150:+	41.51	45.7	43.96	62.92	64.29	65.58	-20.54	no
CDK5RAP3	ENSG00000108465	HsaINT0032633	chr17:46052880-46053019=46053235-46053379:+	83.11	67.55	79.65	26.83	16.16	18.39	56.31	no
CELSR2	ENSG00000143126	HsaINT0033222	chr1:109812555-109812755=109813048-109813222:+	38.84	53.49	42.86	14.73	10	13.91	32.1833	co-reg
CLCNKB	ENSG00000184908	HsaINT0036037	chr1:16376310-16376411=16377011-16377095:+	57.38	64.44	0	0	7.65	23.71	30.1533	opp
CLINT1	ENSG00000113282	HsaINT0036338	chr5:157218711-157219003=157216371-157216575:-	25.77	26.52	25.82	6.61	5.62	6.1	19.9267	co-reg
COL7A1	ENSG00000114270	HsaINT0039618	chr3:48632508-48632593=48631801-48631981:-	26.85	22.69	29.35	5.39	3.09	4.46	21.9833	no
COL7A1	ENSG00000114270	HsaINT0039702	chr3:48630003-48630132=48629784-48629900:-	65.07	58.23	62.85	25	25	19.6	38.85	no
CUX1	ENSG00000257923	HsaINT0043504	chr7:101916637-101916764=101917515-101917581:+	3.47	4.07	3.92	23.27	24.62	23.46	-19.9633	co-reg
DMAP1	ENSG00000178028	HsaINT0048752	chr1:44680375-44680570=44683983-44684141:+	38.04	45.71	42.07	14.81	9.31	12.37	29.7767	no
DNHD1	ENSG00000179532	HsaINT0050591	chr11:6561106-6561313=6565351-6565476:+	78.95	78.95	33.33	33.33	25	20	37.6333	opp
DNHD1	ENSG00000179532	HsaINT0050594	chr11:6565804-6565901=6566022-6568896:+	93.33	78.95	81.25	45.45	30.77	38.1	46.4033	no
DPP7	ENSG00000176978	HsaINT0051824	chr9:140009099-140009195=140008915-140009028:-	53.27	50.72	49.42	69.46	74.24	70.86	-20.3833	no
EDN1	ENSG00000078401	HsaINT0054017	chr6:12290529-12290926=12292574-12292742:+	8.33	4.35	6.67	0	47.5	50	-26.05	NA
ERBB2	ENSG00000141736	HsaINT0057484	chr17:37871993-37872192=37872554-37872686:+	58.76	64.36	63.38	10.68	10.58	7.34	52.6333	co-reg
FBXL15	ENSG00000107872	HsaINT0062627	chr10:104181111-104181264=104181544-104182049:+	30.16	33.03	37.02	61.05	56.98	61.94	-26.5867	opp
FCHSD1	ENSG00000197948	HsaINT0063277	chr5:141024426-141024509=141024140-141024257:-	68.25	56.36	72.31	25.42	19.05	20	44.15	no
FNBP1L	ENSG00000137942	HsaINT0065338	chr1:94016504-94016662=94017966-94020218:+	65.66	68.95	69.26	46.13	52.78	45.54	19.8067	co-reg
GEN1	ENSG00000178295	HsaINT0068620	chr2:17935414-17935612=17941196-17941371:+	83.89	86.01	87.54	49.06	45.9	12.5	49.9933	no
GIGYF1	ENSG00000146830	HsaINT0069028	chr7:100280635-100280853=100280213-100280400:-	88.94	88.5	92.66	59.8	57.45	61.05	30.6	no
GLIPR1	ENSG00000139278	HsaINT0069501	chr12:75892474-75892500=75892604-75895716:+	48.37	55.93	43.22	79.66	90.44	79.32	-33.9667	no
GMPPA	ENSG00000144591	HsaINT0069941	chr2:220363617-220363976=220364683-220364737:+	68.75	67.18	63.11	43.94	39.34	24.21	30.5167	co-reg
GNPTG	ENSG00000090581	HsaINT0070339	chr16:1412207-1412321=1412453-1412535:+	18.28	17.14	13.87	42.11	38.71	44.3	-25.2767	opp
GNRH1	ENSG00000147437	HsaINT0070342	chr8:25279089-25279184=25276774-25276976:-	85.58	69.27	100	36.88	32.26	70.77	38.3133	no
HAGHL	ENSG00000103253	HsaINT0074118	chr16:779009-779088=779288-779715:+	14.98	22.12	16.26	60.78	45.81	48.25	-33.8267	no
HDAC10	ENSG00000100429	HsaINT0074550	chr22:50688856-50688952=50688492-50688589:-	83.03	91.3	91.76	59.42	51.21	60.34	31.7067	no
HDAC7	ENSG00000061273	HsaINT0074699	chr12:48189370-48189550=48188967-48189163:-	36.19	36.42	37.17	13.25	10.37	10.99	25.0567	co-reg
HLTF	ENSG00000071794	HsaINT0076516	chr3:148749988-148750159=148747904-148749150:-	65.03	60.41	58.21	79.65	86.05	81.26	-21.1033	no
HMG20A	ENSG00000140382	HsaINT0076670	chr15:77771521-77771663=77775312-77777945:+	42.06	48.39	33.33	7.35	11.81	7.56	32.3533	co-reg
HNRNPM	ENSG00000099783	HsaINT0077072	chr19:8530208-8530246=8530364-8530399:+	22.18	20.75	21.55	49.01	48.07	48.72	-27.1067	co-reg
KBTBD4	ENSG00000123444	HsaINT0084173	chr11:47600380-47600521=47598963-47599580:-	11.11	33.33	28.57	82.98	0	68.63	-26.2	opp
KCNC4	ENSG00000116396	HsaINT0084261	chr1:110768597-110768800=110774843-110775219:+	66.67	77.27	83.33	52.94	22.86	26.83	41.5467	co-reg
LAMB2	ENSG00000172037	HsaINT0090401	chr3:49167037-49167149=49166678-49166757:-	73.91	50.56	60	32.2	22.35	15.38	38.18	co-reg
LAMB2	ENSG00000172037	HsaINT0090408	chr3:49163180-49163323=49162686-49162917:-	72.15	86.49	79.41	39.78	25.81	29.52	47.6467	co-reg
LAMB2	ENSG00000172037	HsaINT0090418	chr3:49160137-49160485=49159596-49159803:-	63.13	63.64	60.27	28.92	25.41	30.57	34.0467	no
LAMB2	ENSG00000172037	HsaINT0090424	chr3:49169549-49169622=49168968-49169156:-	55.56	52.38	49.21	8.57	12.87	5.98	43.2433	co-reg
MAGED2	ENSG00000102316	HsaINT0098440	chrX:54841681-54842123=54842314-54842445:+	6.41	5.97	5.07	23.71	19.79	23.96	-16.67	no
39873	NA	HsaINT0099929	chr12:58150712-58150867=58151891-58152083:+	66.1	60.87	54.1	16.67	20.59	18.07	41.9133	co-reg
MDM2	ENSG00000135679	HsaINT0101115	chr12:69229609-69229764=69230452-69230529:+	37.63	37.39	30.74	3.2	4.39	5.38	30.93	co-reg
MEGF6	ENSG00000162591	HsaINT0101822	chr1:3418360-3418485=3417741-3417872:-	96.52	94.23	95.88	68.86	73.83	72.28	23.8867	co-reg
MEGF8	ENSG00000105429	HsaINT0101869	chr19:42862296-42862459=42862939-42863106:+	80	71.43	100	28	46.67	15.79	53.6567	co-reg
MMP25	ENSG00000008516	HsaINT0104040	chr16:3108182-3108334=3108413-3108670:+	64.71	66.67	27.27	14.29	20	25	33.12	no
MPI	ENSG00000178802	HsaINT0104666	chr15:75188493-75188666=75189352-75189560:+	38.64	34.21	34.12	7.91	12.94	10	25.3733	co-reg
MRI1	ENSG00000037757	HsaINT0105009	chr19:13876768-13876943=13879375-13879551:+	49.57	46.75	36.53	23.03	15.71	22.55	23.8533	no
MST1R	ENSG00000164078	HsaINT0105747	chr3:49935484-49935644=49934953-49935118:-	72.73	77.42	90.16	32.71	26.14	25.2	52.0867	opp
MYBL1	ENSG00000185697	HsaINT0107148	chr8:67507818-67507992=67505355-67505429:-	34.61	29.63	40.71	6.44	13.54	8.73	25.4133	co-reg
NAT9	ENSG00000109065	HsaINT0110132	chr17:72768357-72768416=72768099-72768193:-	79.66	83.91	82.93	52.08	48.21	56.67	29.8467	no
NDOR1	ENSG00000188566	HsaINT0111727	chr9:140100119-140100364=140100684-140100761:+	53.85	74.07	62.96	33.77	33.87	26.13	32.37	no
NLRX1	ENSG00000160703	HsaINT0114127	chr11:119052803-119053054=119053827-119054725:+	50	60.87	54.84	14.29	20	15.62	38.6	co-reg
NOL3	ENSG00000140939	HsaINT0114420	chr16:67204405-67204477=67205055-67205360:+	71.43	25	100	60	28.57	42.86	21.6667	co-reg
NRF1	ENSG00000106459	HsaINT0115846	chr7:129251555-129251665=129297186-129297414:+	0	36.84	0	0	0	0	12.28	no
OCEL1	ENSG00000099330	HsaINT0117728	chr19:17337502-17337678=17337803-17338008:+	45.02	51.72	50.3	70.73	70	78.14	-23.9433	no
PCNXL2	ENSG00000135749	HsaINT0121467	chr1:233121838-233122286=233119882-233120223:-	55.56	50	29.41	100	33.33	42.86	-13.74	opp
PFKM	ENSG00000152556	HsaINT0123417	chr12:48528726-48528821=48529074-48529166:+	36.96	40.17	46.29	9.62	5.19	8.38	33.41	no
PGBD1	ENSG00000137338	HsaINT0123533	chr6:28264593-28264722=28265672-28265768:+	89.04	86.96	95.29	11.86	8.05	14.81	78.8567	co-reg
PIGO	ENSG00000165282	HsaINT0124807	chr9:35092540-35092764=35091237-35091288:-	92.17	91.37	90.57	63.18	60.95	61.16	29.6067	no
PIGT	ENSG00000124155	HsaINT0124856	chr20:44049168-44049333=44052856-44053021:+	90	80.95	66.67	24.32	18.92	30.43	54.65	opp
POMT2	ENSG00000009830	HsaINT0129592	chr14:77746166-77746271=77745072-77745212:-	59.64	63.01	51.13	23.46	13.56	15.22	40.5133	co-reg
PORCN	ENSG00000102312	HsaINT0129695	chrX:48370977-48371107=48371223-48371240:+	0	100	100	4.98	7.28	100	29.2467	opp
PRMT10	ENSG00000164169	HsaINT0132303	chr4:148594110-148594277=148591792-148591894:-	60	48.15	40	3.33	7.69	5.45	43.8933	co-reg
PTPRM	ENSG00000173482	HsaINT0134923	chr18:8376460-8376595=8378263-8378412:+	41.18	37.82	34.07	13.14	16.92	14.29	22.9067	opp
QTRT1	ENSG00000213339	HsaINT0135832	chr19:10822837-10822975=10823229-10823304:+	71.57	73.96	82.47	50.31	44.76	50	27.6433	co-reg
RBM25	ENSG00000119707	HsaINT0138427	chr14:73566375-73566458=73569900-73570186:+	26.61	27.56	24.18	6.44	5.9	5.07	20.3133	no
RREB1	ENSG00000124782	HsaINT0143332	chr6:7181357-7181479=7182103-7182315:+	81.05	74.55	73.63	13.73	12.24	24.73	59.51	no
SEC31B	ENSG00000075826	HsaINT0146944	chr10:102248615-102248731=102247784-102247855:-	10.2	0	2.56	7.69	33.33	49.3	-25.8533	no
SETD6	ENSG00000103037	HsaINT0148343	chr16:58550712-58550832=58551955-58552135:+	59.11	55.31	48.72	22.86	22.01	24.16	31.37	co-reg
SLC25A43	ENSG00000077713	HsaINT0151887	chrX:118544153-118544325=118585972-118586106:+	65.52	51.72	77.78	13.33	9.68	6.31	55.2333	co-reg
SLCO1B3	ENSG00000111700	HsaINT0154328	chr12:21032370-21032565=21033789-21033954:+	100	85.89	88.12	16.76	14.94	6.47	78.6133	NA
SMG5	ENSG00000198952	HsaINT0155400	chr1:156221194-156221268=156220649-156220787:-	23.72	21.68	24.22	7.02	4.96	6.78	16.9533	co-reg
SPG7	ENSG00000197912	HsaINT0157863	chr16:89597091-89597216=89598312-89598474:+	33.33	27.61	32.87	11.66	9.39	6.75	22.0033	co-reg
SRSF2	ENSG00000161547	HsaINT0159248	chr17:74731854-74731957=74730199-74731240:-	39.26	35.6	42.86	72.96	67.65	63.37	-28.7533	co-reg
SRSF5	ENSG00000100650	HsaINT0159278	chr14:70235899-70235968=70237184-70237257:+	30.12	33.33	34.56	17.37	10.37	11.93	19.4467	no
STK25	ENSG00000115694	HsaINT0160790	chr2:242439588-242439696=242438672-242438829:-	24.21	25.99	27.5	7.13	6.13	7.14	19.1	co-reg
TAF15	ENSG00000172660	HsaINT0163393	chr17:34151082-34151202=34160911-34160945:+	26.18	26.81	18.45	4.03	2.9	2.19	20.7733	no
TOMM40	ENSG00000130204	HsaINT0170806	chr19:45394477-45394571=45394664-45394946:+	44.25	42.04	39.18	70.79	57.88	64.99	-22.73	no
TP53BP1	ENSG00000067369	HsaINT0171096	chr15:43714053-43714324=43713223-43713372:-	25.64	30.56	54.55	5.13	5.04	2.86	32.5733	co-reg
TRIM41	ENSG00000146063	HsaINT0172365	chr5:180661932-180661995=180662354-180662808:+	56.9	63.14	70.51	83.84	83.47	86.27	-21.01	no
TTF2	ENSG00000116830	HsaINT0174610	chr1:117639973-117640055=117641455-117641529:+	54.72	52.04	54.29	10.48	5.14	7.69	45.9133	co-reg
TUG1	ENSG00000253352	HsaINT0175507	chr22:31365634-31367765=31368841-31369587:+	90.07	86.84	93.51	40.54	33.33	26.18	56.79	opp
TYK2	ENSG00000105397	HsaINT0175836	chr19:10464718-10464910=10464204-10464322:-	55.91	53.15	61.29	27.52	31.87	32.08	26.2933	co-reg
ULK3	ENSG00000140474	HsaINT0177575	chr15:75132839-75132982=75132575-75132657:-	73.08	81.58	79.78	48.1	58.27	43.75	28.1067	co-reg
WDR90	ENSG00000161996	HsaINT0182719	chr16:703746-703803=705029-705147:+	91.3	80.56	86.44	54.55	37.5	61.29	34.9867	co-reg
ZMIZ2	ENSG00000122515	HsaINT0185942	chr7:44804934-44805178=44805763-44805932:+	61.83	62.96	53.04	18.14	11.11	9.23	46.45	co-reg
ZMIZ2	ENSG00000122515	HsaINT0185950	chr7:44798880-44799059=44799750-44799827:+	60.98	73.1	62.2	31.21	24.41	32.84	35.94	co-reg
ZMIZ2	ENSG00000122515	HsaINT0185951	chr7:44799750-44799827=44800024-44800192:+	43.35	43.9	44.09	21.05	20	24.53	21.92	no
ZNF266	ENSG00000174652	HsaINT0186643	chr19:9529438-9529571=9529181-9529307:-	30.43	55.56	27.27	79.75	57.14	86.61	-36.7467	no
ZNF839	ENSG00000022976	HsaINT0188532	chr14:102805431-102805560=102807660-102809044:+	89.71	77.64	77.1	30.13	24.59	31.57	52.72	no
