# Supplementary material for: The RNA-binding profile of Acinus, a peripheral component of the exon junction complex, reveals its role in splicing regulation
Source: RNA. 2016 Sep;22(9):1411–26. doi: 10.1261/rna.057158.116 (PMC4986896; doi:10.1261/rna.057158.116)
Supplement: Supplemental Material [file supp_057158.116_Supp_Table_S4.xlsx]

## Sheet: Sheet1
primer name	primer sequence	events detection	exon/intron number and transcript reference	expected size of PCR products
hPPHLN1_F	GAGCGGACGGCTGCATTTAC	alternative cassette exon HsaEX0049396	exon 6 of NM_016488	618 and 783nt
hPPHLN1_R	TTTCAGCAGCCCACTTGCTTG			minor band: 561 and 726
hECT2_F	ACTACTGGGAGGACTAGCTTG	alternative cassette exon HsaEX0021536	exon 4 of NM_001258315	399 and 492nt
hECT2_R	ACAATACAACGGGCGACATG
hERBB2_F	ACTGAGGGAACTGGGCAGT	intron retention HsaINT0057484	intron 12 of NM_004448	269 and 630nt
hERBB2_R	GTACTCGGCATTCCTCCACG
hMST1R_F	CCCTGTGTGGCTCCAACTTC	intron retention HsaINT0105747	intron 5 of NM_002447	252 and 617 nt
hMST1R_R	CGTCTACCCGGAAGTGCTTG
hMDM2_F	AGGTGATTGGTTGGATCAGG	intron retention HsaINT0101115	intron 9 of NM_002392	298 and 985nt
hMDM2_R	AGGAAGCCAATTCTCACGAAGG
hLAMB2_F	CATGGTGGTCAGTGCCTGTG	intron retention HsaINT0090408	Intron 18 of NM_002292	196 and 458nt
hLAMB2_R	GGTCACAGCGAAGCCCAAAG
hCDK5RAP3_F	AGCAAGAATACAGCCGCAAGG	intron retention HsaINT0032633	intron 6 of NM_001278217	260 and 475nt
hCDK5RAP3_R	CATTGGCAACACCTGCTCTG
hSRSF5_F	GGTGGAAGAGGTAGAGGACG	intron retention HsaINT0159278	intron 6 of NM_006925	200nt and 1.4kb
hSRSF5_R	AATTTAGGTCGGTGTGCATCC
qPCR_hDFFA_F	GTTGCCTTGAACTGGGACAT	intron retention HsaINT0047067	exon 6 of NM_004401
qPCR_hDFFA_R	TCGCTTAGGATTCTGCAGGT
qPCR_hDFFA2_F	ATAGCAGGGCCCAATCTTCT		intron 5 of NM_004401
qPCR_hDFFA_R	ATCCCCTCAAGTTTGCCTTT
hTAF15_F	ACCAGCAGTCAGGCTATGATC	alternative donor splice site	exon7 of NM_139215	210 and 308nt
hTAF15_R	TCCATAATCCCTGTGACCACC
hAPH1A_F	TTTCGGCTGCACTTTCGTCG	alternative acceptor splice site HsaALTA0000551	exon2 of NM_001077628	338 and 475nt
hAPH1A_R	TGTCAGAAAGGCTGAAGTCAGG		use of downstream splice in NM_001243772
